# Supplementary material for: Blockade of the deubiquitinating enzyme USP48 degrades oncogenic HMGA2 and inhibits colorectal cancer invasion and metastasis
Source: PubMed Central journal article supplement — Acta Pharm Sin B. 2024 Jan 17;14(4):1624–43. doi: 10.1016/j.apsb.2024.01.006 (PMC10985028; doi:10.1016/j.apsb.2024.01.006), 2024-01-17
Supplement: mmc1.pdf [file mmc1.pdf]

**Supporting Information for  
Original article**

**Blockade of the deubiquitinating enzyme USP48 degrades oncogenic  
HMGA2 and inhibits colorectal cancer invasion and metastasis**

Can Cheng<sup>a,b,†</sup>, Hanhui Yao<sup>a,b,†</sup>, Heng Li<sup>b,c,†</sup>, Jingwen Liu<sup>d</sup>, Zhengyi Liu<sup>e</sup>, Yang Wu<sup>a,b</sup>,  
Liang Zhu<sup>a</sup>, Hejie Hu<sup>a,\*</sup>, Zhengdong Fang<sup>a,\*</sup>, Liang Wu<sup>a,b,\*</sup>

<sup>a</sup>*Department of General Surgery, the First Affiliated Hospital of USTC, Division of Life Sciences and Medicine, University of Science and Technology of China, Hefei 230001, China*

<sup>b</sup>*Anhui Province Key Laboratory of Hepatopancreatobiliary Surgery, the First Affiliated Hospital of USTC, Division of Life Sciences and Medicine, University of Science and Technology of China, Hefei 230001, China*

<sup>c</sup>*Department of Comprehensive Surgery, Anhui Provincial Cancer Hospital, West District of the First Affiliated Hospital of USTC, Division of Life Sciences and Medicine, University of Science and Technology of China, Hefei 230001, China*

<sup>d</sup>*Anhui Provincial Hospital Health Management Center, the First Affiliated Hospital of USTC, Division of Life Sciences and Medicine, University of Science and Technology of China, Hefei 230001, China*

<sup>e</sup>*Department of Breast Surgery, Henan Provincial People's Hospital, People's Hospital of Zhengzhou University, People's Hospital of Henan University, Zhengzhou 450003, China*

Received 24 October 2023; received in revised form 14 December 2023; accepted 8 January 2024

<sup>†</sup>These authors made equal contributions to this work.

\*Corresponding authors.

E-mail addresses: [wu8722@ustc.edu.cn](mailto:wu8722@ustc.edu.cn) (Liang Wu), [fangzhengdong@126.com](mailto:fangzhengdong@126.com) (Zhengdong Fang), [huhejie@163.com](mailto:huhejie@163.com) (Hejie Hu).

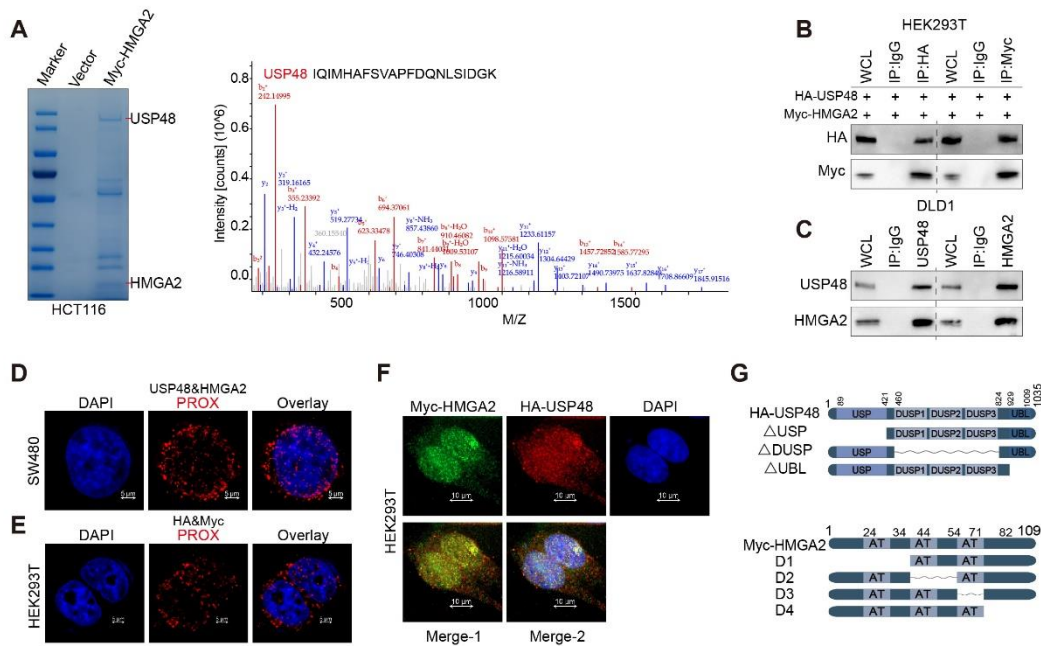

**Figure S1. USP48 interacts with HMGA2.** (A) Mass spectrometry was employed to analyze a USP48 peptide present in the Myc-HMGA2 precipitate. (B) Co-transfection of HA-USP48 and Myc-HMGA2 was performed in 293T cells, followed by IP with anti-HA or anti-Myc antibodies. (C) IP assays were performed on DLD1 cell lysates using control IgG, anti-USP48, or anti-HMGA2 antibodies and detected with appropriate antibodies. (D) In situ PLA between endogenous USP48 and HMGA2 in SW480 cells. Representative images are shown with merged PLA and DAPI channels from PLA experiments. Scale bar, 10  $\mu$ m. (E) In situ PLA between exogenous USP48 and HMGA2 in HEK293T cells. Representative images are shown with merged PLA and DAPI channels from PLA experiments. Scale bar, 10  $\mu$ m. (F) HEK293T cells were co-transfected with HA-USP48 and Myc-HMGA2, followed by Immunofluorescence using antibodies against HA and Myc. Scale bar, 10  $\mu$ m. (G) A schematic diagram depicting the full-length USP48 and HMGA2 proteins, as well as their respective deletion mutants.

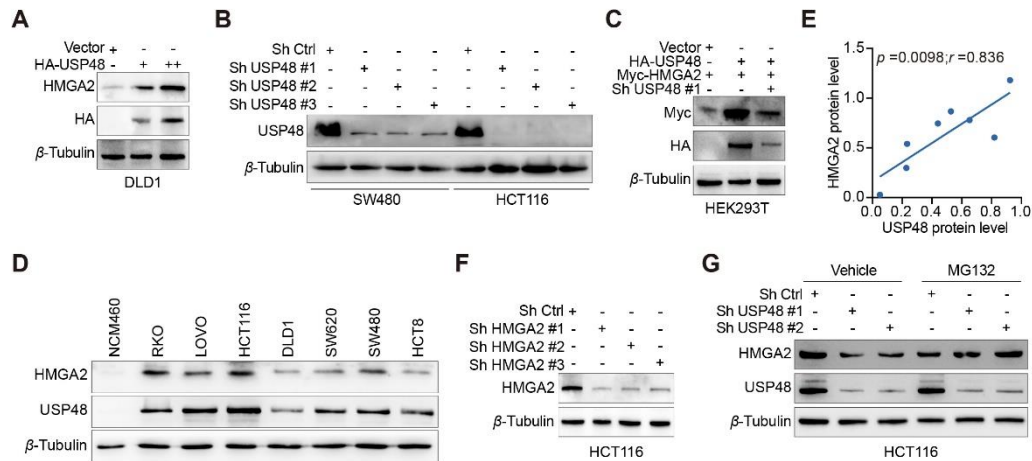

**Figure S2. USP48 maintains HMGA2 stability.** (A) DLD1 cells were transfected with increasing amounts of HA-tagged USP48, and cell lysates were analyzed by IB using antibodies against HMGA2. (B) SW480 and HCT116 cells were transfected with three distinct USP48 shRNA constructs, followed by subsequent analysis of USP48 protein expression levels. (C) IB analysis of Myc-HMGA2 levels in HEK293T cells transduced with equal amounts of Myc-HMGA2, together with either HA-tagged USP48-WT alone or both HA-tagged USP48-WT and USP48 shRNA. (D) Cell lysates from several CRC cell lines were blotted with USP48 and HMGA2 antibodies. (E) The Pearson correlations of analysis of USP48 and HMGA2 in CRC cell lines. Pearson  $r$  indicates the correlation coefficient. (F) SW480 cells were transfected with three independent HMGA2 shRNA, and then HMGA2 protein levels were analyzed. (G) HCT116 cells transfected with two independent USP48 shRNA were treated with DMSO or MG132 (10  $\mu\text{mol/L}$ ) for 6 h, and then USP48 and HMGA2 were analyzed. Data are presented as mean  $\pm$  SD. One-way ANOVA test. All experiments were performed independently at least three times.

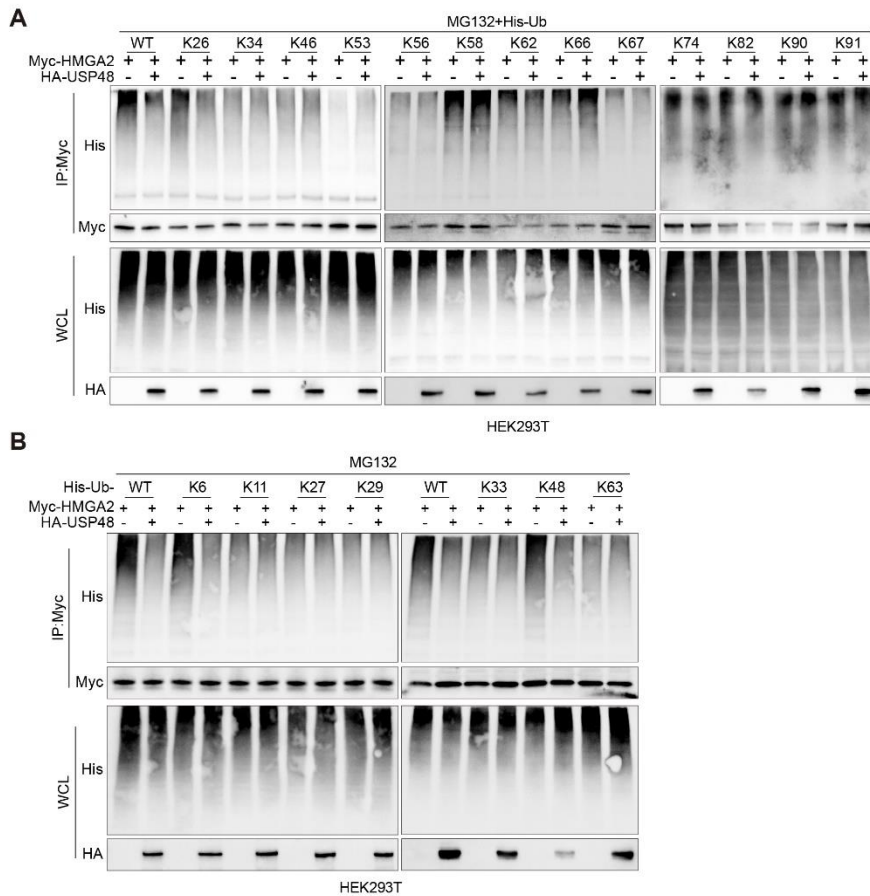

**Figure S3. USP48 deubiquitinates HMGA2.** (A) USP48 deubiquitinates specific Lys residues on HMGA2. De-ubiquitination assay was performed in HEK293T cells co-transfected with His-Ub, HA-USP48, Myc-HMGA2-WT, and Myc-HMGA2 K26/34/46/53/56/58/62/66/67/74/82/90/91, followed by treatment with 10  $\mu$ mol/L of MG132 for 6 h. (B) HEK293T cells were co-transfected with indicated plasmids, treated with MG132 for 6 h, and subjected to IP with Myc antibody. IB was performed using anti-His antibodies to detect ubiquitinated HMGA2. For all panels, data are representative results of three independent experiments.



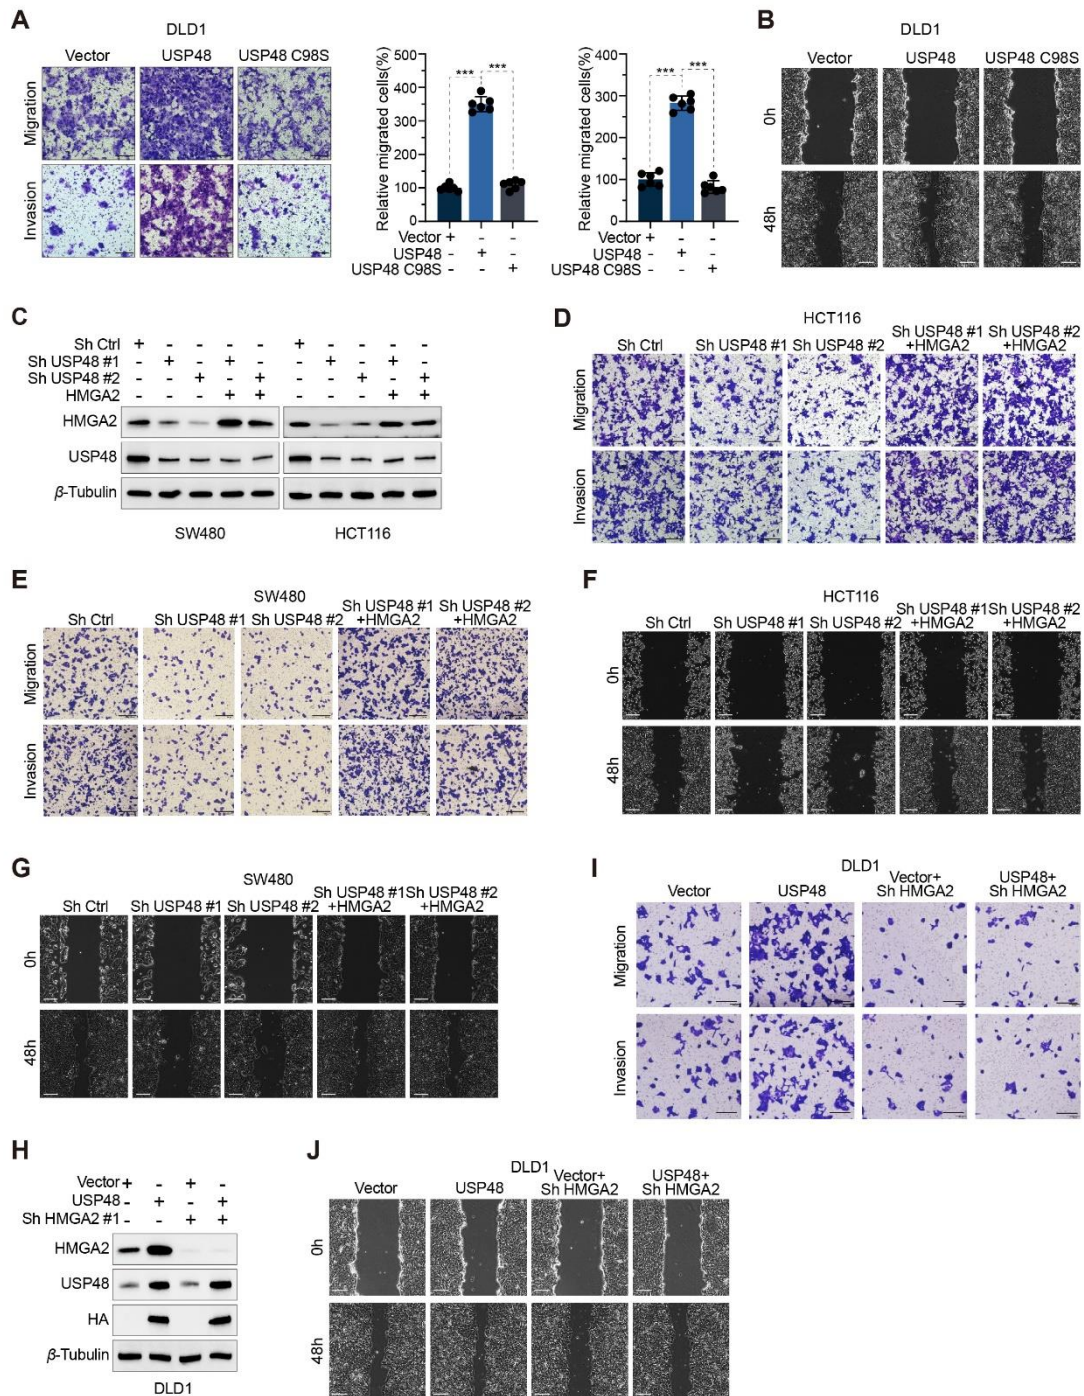

**Figure S4. Ablation of USP48 expression impairs the metastatic potential of CRC cells.** (A) Transwell migration and invasion assays of DLD1 cells transfected with USP48-WT, USP48-C98S, or vector control. Relative migrated cells in each group were quantified. (B) Wound-healing assay of DLD1 cells transfected with USP48-WT, USP48-C98S, or vector control. Photographs were taken at 0 and 48 h following the initial scratch. (C) IB analysis of USP48 and HMGA2 levels in SW480 and

HCT116 cells expressing Sh-Ctrl or Sh-USP48 #1 or Sh-USP48 #2, reconstituted with vector control or HMGA2. (D-G) Knockdown of USP48 was performed in HCT116 and SW480 cells, with or without overexpression of HMGA2. Representative images of migrated cells were captured for each group (D, E), and representative photographs were taken at 0 and 48 h after the initial scratch (F, G). (H) IB analysis of USP48 and HMGA2 levels in DLD1 cells expressing vector control or HMGA2, reconstituted with Sh-Ctrl or Sh-HMGA2 #1. (I-J) USP48 was upregulated in DLD1 cells with or without HMGA2 knockdown. Representative images of migrated cells were captured for each group (I), and representative photographs were taken at 0 and 48 h after the initial scratch (J). Scale bar, 200  $\mu$ m (A, B, D-G, I and J). Data are presented as mean  $\pm$  SD. One-way ANOVA test (A). All in vitro experiments were performed independently at least three times. \*\*\* $P$ <0.001.

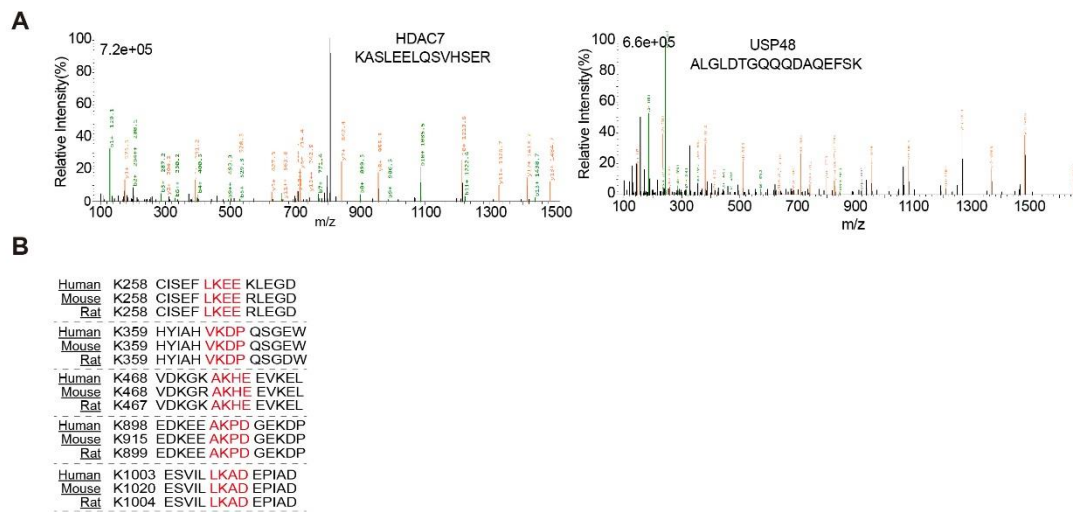

**Figure S5. USP48 is SUMOylated by SUMO1 at Lys-258.** (A) Mass-spectrometry analysis of HDAC7 and USP48 peptides in HA-USP48 precipitate. (B) Identified five potential SUMO-conjugation consensus motifs are evolutionarily conserved (red) from mouse to man.

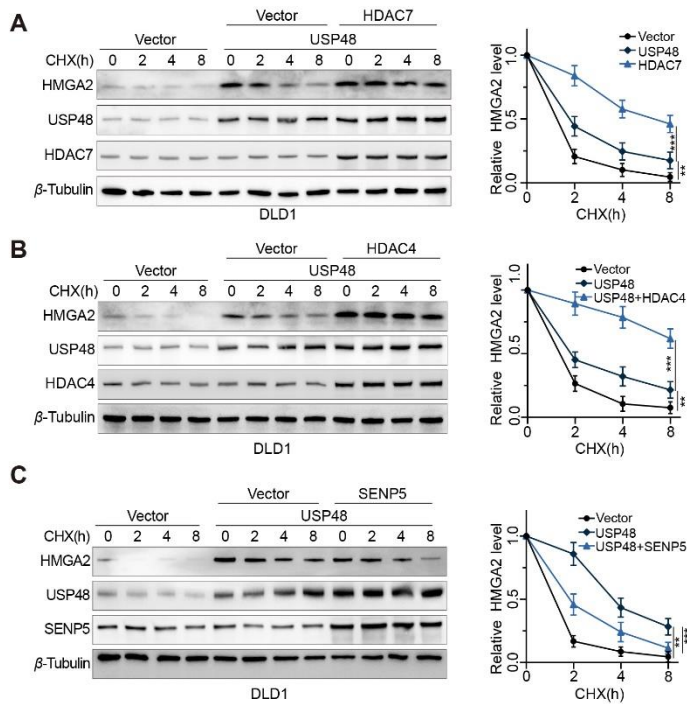

**Figure S6. The function of USP48 on HMGGA2 is significantly enhanced by SUMOylation at Lys-258.**

(A-C) DLD1 cells were transfected with specific plasmids, as indicated and treated with CHX (50  $\mu\text{g/ml}$ ) for the indicated time points. Quantification of HMGGA2 levels relative to  $\beta$ -Tubulin is shown. Data are presented as mean  $\pm$  SD. One-way ANOVA test (A-C). All experiments were performed independently at least three times. \*\*\* $P < 0.001$ .

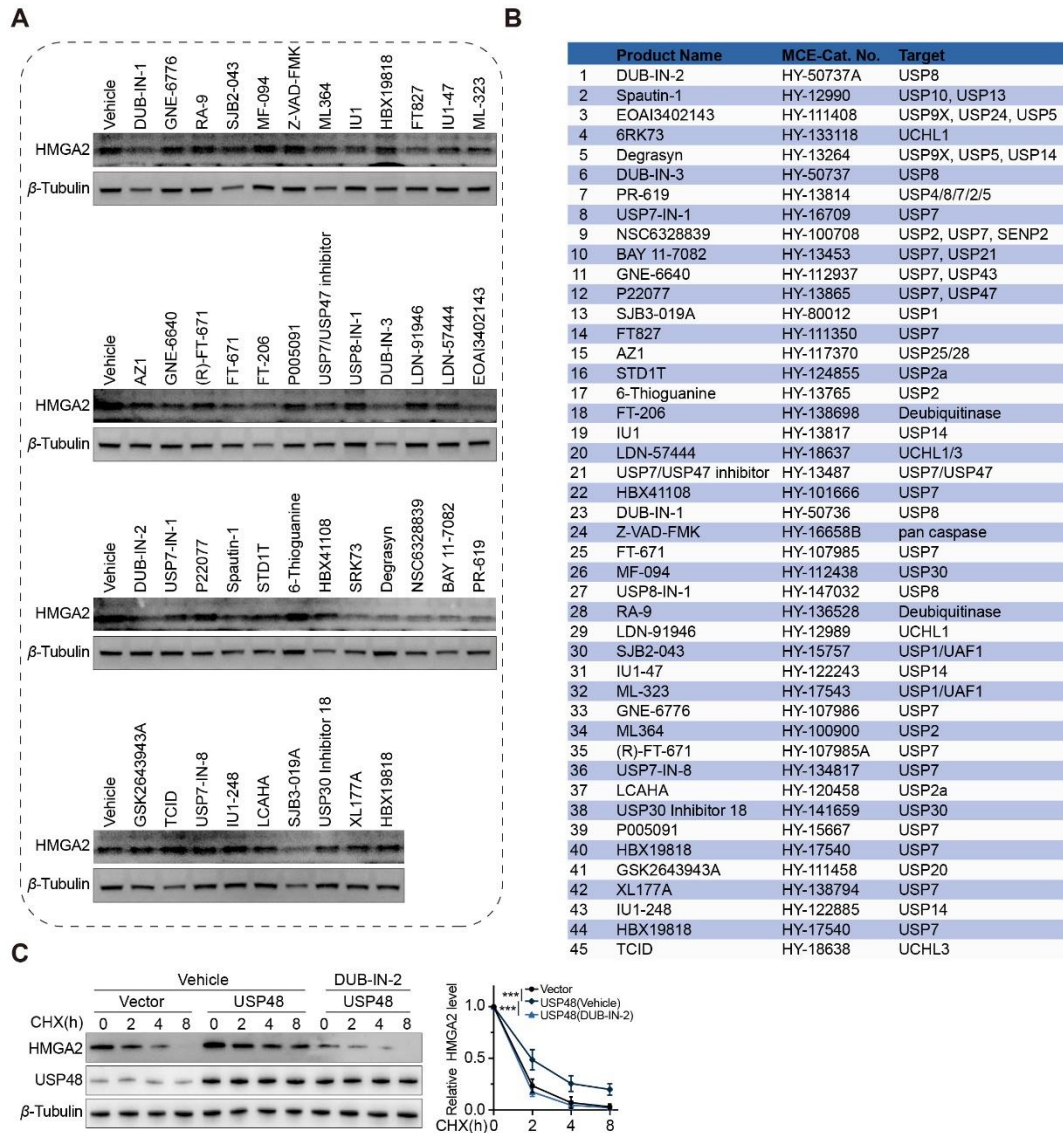

**Figure S7. DUB-IN-2 hinders the deubiquitinating activity of USP48 and induces the degradation of HMGA2.** (A) IB analysis of exogenous HMGA2 expression in SW480 cells. SW480 cells were treated with the library of 45 reported DUB inhibitors at a concentration of 2.5  $\mu\text{mol/L}$  for 12 h and assessed by IB. (B) The information of the library of 45 reported DUB inhibitors. (C) DLD1 cells transfected with control vector or HA-USP48 were treated with DMSO or DUB-IN-2 (2.5  $\mu\text{mol/L}$ ) 24 h, then CHX (50  $\mu\text{g/ml}$ ) was added at a set time point, and USP48 and HMGA2 were analyzed by IB analysis. \*\*\* $P < 0.001$ .



**Table S1. The primers list**

| <b>Gene</b> | <b>Forward (5'to3')</b> | <b>Reverse (5'to3')</b> |
|-------------|-------------------------|-------------------------|
| USP48       | CACATCGAGACCGCTTACCG    | ACCAACCAAGCAATTCCGGATT  |
| HMGA2       | ACCCAGGGGAAGACCCAAA     | CCTCTTGGCCGTTTTTCTCCA   |
| Slug        | CGAACTGGACACACATACAGTG  | CTGAGGATCTCTGGTTGTGGT   |
| IGF2BP2     | AGCCTGTCACCATCCATGC     | CTTCGGCTAGTTTGGTCTCATC  |
| SOX2        | GCCGAGTGGAACTTTTGTCG    | GGCAGCGTGTACTTATCCTTCT  |
| GAPDH       | GGAGCGAGATCCCTCCAAAAT   | GGCTGTTGTCATACTTCTCATGG |

**Table S2. The sequences of shRNA**

| <b>Gene</b> |        | <b>Sense Sequence (5'to3')</b> |
|-------------|--------|--------------------------------|
| shControl   | shRNA  | TACAAACGCTCTCATCGACAAG         |
| USP48       | shRNA1 | AAGAAGATTCTAAACTTAT            |
| USP48       | shRNA2 | GCGAGAACTGTCAAAGCAA            |
| USP48       | shRNA3 | AGCCCAACACTACTGTTCA            |
| HMGA2       | shRNA1 | CAACAAGTTGTTTCAGAAGA           |
| HMGA2       | shRNA2 | AGGACTATATTAATCACCT            |
| HMGA2       | shRNA3 | ACAACAAGTTGTTTCAGAAG           |

**Table S3. Related to Figure 1; HMGA2 interacting proteins**

| Accession | Protein | Description                                               | MW.[kDa] | Protein.score | Sequence.c<br>overage.(%) | #.Unique.<br>Peptides | #.Peptides | #.PSMs | Abundances  |
|-----------|---------|-----------------------------------------------------------|----------|---------------|---------------------------|-----------------------|------------|--------|-------------|
| Q86UV5    | USP48   | Ubiquitin carboxyl-terminal hydrolase 48                  | 119      | 2349          | 50                        | 39                    | 39         | 61     | 5767203050  |
| P14618    | PKM     | Pyruvate kinase PKM                                       | 57.9     | 1230          | 47                        | 19                    | 19         | 29     | 498628917.3 |
| O60343    | TBC1D4  | TBC1 domain family member 4                               | 146.5    | 594           | 15                        | 15                    | 15         | 16     | 122079611.3 |
| P12956    | XRCC6   | X-ray repair cross-complementing protein 6                | 69.8     | 481           | 28                        | 13                    | 13         | 14     | 92465227.81 |
| P00338    | LDHA    | L-lactate dehydrogenase A chain                           | 36.7     | 395           | 32                        | 11                    | 12         | 15     | 613604796.5 |
| P53396    | ACLY    | ATP-citrate synthase                                      | 120.8    | 342           | 14                        | 11                    | 11         | 12     | 73329547    |
| P49327    | FASN    | Fatty acid synthase                                       | 273.3    | 442           | 7                         | 11                    | 11         | 13     | 35023880.19 |
| P12277    | CKB     | Creatine kinase B-type                                    | 42.6     | 693           | 39                        | 10                    | 10         | 14     | 212590327.9 |
| P00558    | PGK1    | Phosphoglycerate kinase 1                                 | 44.6     | 454           | 29                        | 10                    | 10         | 12     | 203919777.1 |
| Q00610    | CLTC    | Clathrin heavy chain 1                                    | 191.5    | 225           | 7                         | 9                     | 9          | 9      | 44531201.88 |
| P49368    | CCT3    | T-complex protein 1 subunit gamma                         | 60.5     | 188           | 24                        | 8                     | 8          | 9      | 109349572.3 |
| P22033    | MMUT    | Methylmalonyl-CoA mutase, mitochondrial                   | 83.1     | 274           | 16                        | 8                     | 8          | 9      | 86657579.75 |
| Q96QC0    | PPP1R10 | Serine/threonine-protein phosphatase 1 regulatory subunit | 99       | 203           | 13                        | 7                     | 7          | 9      | 35973364.63 |
| Q99729    | HNRNPAB | Heterogeneous nuclear ribonucleoprotein A/B               | 36.2     | 196           | 22                        | 6                     | 7          | 8      | 180104832.5 |
| P49411    | TUFM    | Elongation factor Tu, mitochondrial                       | 49.5     | 258           | 20                        | 6                     | 6          | 7      | 231885119   |
| P48643    | CCT5    | T-complex protein 1 subunit epsilon                       | 59.6     | 227           | 19                        | 6                     | 6          | 6      | 39817375    |
| P04181    | OAT     | Ornithine aminotransferase, mitochondrial                 | 48.5     | 122           | 15                        | 6                     | 6          | 6      | 41321821.75 |
| Q13263    | TRIM28  | Transcription intermediary factor 1-beta                  | 88.5     | 321           | 12                        | 6                     | 6          | 7      | 23311911.63 |
| P22314    | UBA1    | Ubiquitin-like modifier-activating enzyme 1               | 117.8    | 166           | 8                         | 6                     | 6          | 6      | 26099544.25 |

|        |          |                                                           |       |     |    |   |    |    |             |
|--------|----------|-----------------------------------------------------------|-------|-----|----|---|----|----|-------------|
| P22102 | GART     | Trifunctional purine biosynthetic protein adenosine-3     | 107.7 | 228 | 7  | 6 | 6  | 6  | 27596251.75 |
| P07737 | PFN1     | Profilin-1                                                | 15    | 233 | 55 | 5 | 5  | 6  | 113427829   |
| P00492 | HPRT1    | Hypoxanthine-guanine phosphoribosyltransferase            | 24.6  | 200 | 28 | 5 | 5  | 5  | 22595299.5  |
| P62826 | RAN      | GTP-binding nuclear protein Ran                           | 24.4  | 157 | 25 | 5 | 5  | 5  | 54109130    |
| P04075 | ALDOA    | Fructose-bisphosphate aldolase A                          | 39.4  | 180 | 24 | 5 | 5  | 5  | 24828406    |
| P07900 | HSP90AA1 | Heat shock protein HSP 90-alpha                           | 84.6  | 537 | 18 | 5 | 10 | 12 | 63286648    |
| P23526 | AHCY     | Adenosylhomocysteinase                                    | 47.7  | 257 | 16 | 5 | 5  | 5  | 53815497    |
| Q13838 | DDX39B   | Spliceosome RNA helicase DDX39B                           | 49    | 163 | 15 | 5 | 5  | 5  | 32126999.5  |
| P22234 | PAICS    | Multifunctional protein ADE2                              | 47    | 171 | 13 | 5 | 5  | 5  | 30025386.13 |
| P40939 | HADHA    | Trifunctional enzyme subunit alpha, mitochondrial         | 82.9  | 264 | 12 | 5 | 5  | 5  | 6648115.375 |
| Q96QK1 | VPS35    | Vacuolar protein sorting-associated protein 35            | 91.6  | 181 | 9  | 5 | 5  | 5  | 22767036.63 |
| P68371 | TUBB4B   | Tubulin beta-4B chain                                     | 49.8  | 918 | 57 | 4 | 18 | 26 | 1196126405  |
| P35232 | PHB      | Prohibitin                                                | 29.8  | 173 | 21 | 4 | 4  | 4  | 12883002.88 |
| P60891 | PRPS1    | Ribose-phosphate pyrophosphokinase 1                      | 34.8  | 189 | 16 | 4 | 4  | 4  | 35725547    |
| P62136 | PPP1CA   | Serine/threonine-protein phosphatase PP1-alpha catalytic  | 37.5  | 157 | 14 | 4 | 4  | 4  | 9409114.25  |
| P04844 | RPN2     | Dolichyl-diphosphooligosaccharide--protein glycosyltransf | 69.2  | 188 | 12 | 4 | 4  | 4  | 2777882.5   |
| Q09028 | RBBP4    | Histone-binding protein RBBP4                             | 47.6  | 187 | 10 | 4 | 4  | 4  | 35302922    |
| P27694 | RPA1     | Replication protein A 70 kDa DNA-binding subunit          | 68.1  | 139 | 9  | 4 | 4  | 4  | 15018820.25 |
| Q12931 | TRAP1    | Heat shock protein 75 kDa, mitochondrial                  | 80.1  | 156 | 8  | 4 | 4  | 4  | 98440227.25 |
| P36871 | PGM1     | Phosphoglucomutase-1                                      | 61.4  | 100 | 8  | 4 | 4  | 4  | 12675501.25 |
| Q9NSD9 | FARSB    | Phenylalanine--tRNA ligase beta subunit                   | 66.1  | 122 | 7  | 4 | 4  | 4  | 11867746.13 |
| P04843 | RPN1     | Dolichyl-diphosphooligosaccharide--protein glycosyltransf | 68.5  | 89  | 7  | 4 | 4  | 4  | 18797843.25 |

|        |        |                                                           |       |     |    |   |   |   |             |
|--------|--------|-----------------------------------------------------------|-------|-----|----|---|---|---|-------------|
| P34932 | HSPA4  | Heat shock 70 kDa protein 4                               | 94.3  | 115 | 6  | 4 | 4 | 4 | 8528908.25  |
| Q9P2J5 | LARS1  | Leucine--tRNA ligase, cytoplasmic                         | 134.4 | 141 | 5  | 4 | 4 | 4 | 4478860.75  |
| P53621 | COPA   | Coatomer subunit alpha                                    | 138.3 | 87  | 5  | 4 | 4 | 4 | 8269097.813 |
| P01031 | C5     | Complement C5                                             | 188.2 | 70  | 3  | 4 | 4 | 4 | 24731683.5  |
| P52926 | HMGA2  | High mobility group protein HMGI-C                        | 11.8  | 179 | 33 | 3 | 3 | 5 | 515931864   |
| P62987 | UBA52  | Ubiquitin-60S ribosomal protein L40                       | 14.7  | 83  | 30 | 3 | 3 | 3 | 177859651.3 |
| P32119 | PRDX2  | Peroxiredoxin-2                                           | 21.9  | 128 | 19 | 3 | 4 | 4 | 25972879.25 |
| Q07021 | C1QBP  | Complement component 1 Q subcomponent-binding protei      | 31.3  | 97  | 17 | 3 | 3 | 3 | 27398328.5  |
| P12004 | PCNA   | Proliferating cell nuclear antigen                        | 28.8  | 107 | 16 | 3 | 3 | 3 | 25164288.5  |
| Q9HAN9 | NMNAT1 | Nicotinamide/nicotinic acid mononucleotide adenylyltransf | 31.9  | 85  | 15 | 3 | 3 | 3 | 15467312.5  |
| P16152 | CBR1   | Carbonyl reductase [NADPH] 1                              | 30.4  | 163 | 13 | 3 | 3 | 4 | 28667731    |
| Q16795 | NDUFA9 | NADH dehydrogenase [ubiquinone] 1 alpha subcomplex s      | 42.5  | 66  | 13 | 3 | 3 | 3 | 6131614.063 |
| P29692 | EEF1D  | Elongation factor 1-delta                                 | 31.1  | 62  | 12 | 3 | 3 | 3 | 38769531    |
| Q9H9B4 | SFXN1  | Sideroflexin-1                                            | 35.6  | 126 | 11 | 3 | 3 | 3 | 24302534    |
| P22695 | UQCRC2 | Cytochrome b-c1 complex subunit 2, mitochondrial          | 48.4  | 97  | 11 | 3 | 3 | 3 | 3261186     |
| P62195 | PSMC5  | 26S proteasome regulatory subunit 8                       | 45.6  | 186 | 10 | 3 | 3 | 4 | 17997023    |
| P43686 | PSMC4  | 26S proteasome regulatory subunit 6B                      | 47.3  | 149 | 9  | 3 | 3 | 4 | 8496432.125 |
| P34897 | SHMT2  | Serine hydroxymethyltransferase, mitochondrial            | 56    | 137 | 8  | 3 | 3 | 3 | 23066143.5  |
| P08243 | ASNS   | Asparagine synthetase [glutamine-hydrolyzing]             | 64.3  | 129 | 8  | 3 | 3 | 3 | 6561163.75  |
| Q9UQ80 | PA2G4  | Proliferation-associated protein 2G4                      | 43.8  | 84  | 8  | 3 | 3 | 3 | 15349949.75 |
| P17812 | CTPS1  | CTP synthase 1                                            | 66.6  | 186 | 7  | 3 | 3 | 4 | 15257876.25 |
| P52209 | PGD    | 6-phosphogluconate dehydrogenase, decarboxylating         | 53.1  | 139 | 7  | 3 | 3 | 3 | 12614580.63 |

|        |          |                                                             |       |     |    |   |    |    |             |
|--------|----------|-------------------------------------------------------------|-------|-----|----|---|----|----|-------------|
| P31939 | ATIC     | Bifunctional purine biosynthesis protein ATIC               | 64.6  | 71  | 7  | 3 | 3  | 3  | 5501426     |
| O14744 | PRMT5    | Protein arginine N-methyltransferase 5                      | 72.6  | 59  | 7  | 3 | 3  | 3  | 20045108.5  |
| Q16658 | FSCN1    | Fascin                                                      | 54.5  | 80  | 6  | 3 | 3  | 3  | 26050094    |
| O43776 | NARS1    | Asparagine--tRNA ligase, cytoplasmic                        | 62.9  | 68  | 6  | 3 | 3  | 3  | 13419340.5  |
| P54886 | ALDH18A1 | Delta-1-pyrroline-5-carboxylate synthase                    | 87.2  | 85  | 5  | 3 | 3  | 3  | 13036177.75 |
| P49588 | AARS1    | Alanine--tRNA ligase, cytoplasmic                           | 106.7 | 120 | 4  | 3 | 3  | 3  | 33485952.5  |
| P16615 | ATP2A2   | Sarcoplasmic/endoplasmic reticulum calcium ATPase 2         | 114.7 | 68  | 3  | 3 | 3  | 3  | 8848696.625 |
| Q13885 | TUBB2A   | Tubulin beta-2A chain                                       | 49.9  | 864 | 52 | 2 | 17 | 23 | 94581273.75 |
| P18085 | ARF4     | ADP-ribosylation factor 4                                   | 20.5  | 148 | 26 | 2 | 4  | 4  | 23049683.25 |
| P63241 | EIF5A    | Eukaryotic translation initiation factor 5A-1               | 16.8  | 155 | 23 | 2 | 2  | 3  | 15563643.25 |
| Q9BUF5 | TUBB6    | Tubulin beta-6 chain                                        | 49.8  | 419 | 21 | 2 | 8  | 11 | 4979366.875 |
| Q15185 | PTGES3   | Prostaglandin E synthase 3                                  | 18.7  | 55  | 18 | 2 | 2  | 2  | 9060008.5   |
| P56537 | EIF6     | Eukaryotic translation initiation factor 6                  | 26.6  | 66  | 17 | 2 | 2  | 2  | 2491518.75  |
| P00491 | PNP      | Purine nucleoside phosphorylase                             | 32.1  | 102 | 14 | 2 | 2  | 2  | 2861677.25  |
| P00387 | CYB5R3   | NADH-cytochrome b5 reductase 3                              | 34.2  | 59  | 12 | 2 | 2  | 2  | 8804801.75  |
| Q9NP79 | VTA1     | Vacuolar protein sorting-associated protein VTA1 homolog    | 33.9  | 57  | 11 | 2 | 2  | 2  | 6625079     |
| Q15181 | PPA1     | Inorganic pyrophosphatase                                   | 32.6  | 145 | 10 | 2 | 2  | 2  | 1877094.75  |
| P13804 | ETFFA    | Electron transfer flavoprotein subunit alpha, mitochondrial | 35.1  | 61  | 10 | 2 | 2  | 2  | 6628321.25  |
| P11177 | PDHB     | Pyruvate dehydrogenase E1 component subunit beta, mit       | 39.2  | 93  | 9  | 2 | 2  | 2  | 5662778.5   |
| Q96FW1 | OTUB1    | Ubiquitin thioesterase OTUB1                                | 31.3  | 73  | 9  | 2 | 2  | 2  | 8612140.75  |
| Q9UBE0 | SAE1     | SUMO-activating enzyme subunit 1                            | 38.4  | 66  | 9  | 2 | 2  | 2  | 3508511     |
| P10768 | ESD      | S-formylglutathione hydrolase                               | 31.4  | 55  | 9  | 2 | 2  | 2  | 4940103.5   |



|        |         |                                                           |      |     |   |   |   |   |             |
|--------|---------|-----------------------------------------------------------|------|-----|---|---|---|---|-------------|
| Q9Y6C9 | MTCH2   | Mitochondrial carrier homolog 2                           | 33.3 | 91  | 8 | 2 | 2 | 2 | 5482844.5   |
| P23381 | WARS1   | Tryptophan--tRNA ligase, cytoplasmic                      | 53.1 | 75  | 8 | 2 | 2 | 2 | 6541823     |
| P39748 | FEN1    | Flap endonuclease 1                                       | 42.6 | 53  | 8 | 2 | 2 | 2 | 9707932     |
| P11766 | ADH5    | Alcohol dehydrogenase class-3                             | 39.7 | 39  | 8 | 2 | 2 | 2 | 10570800    |
| P27695 | APEX1   | DNA-(apurinic or apyrimidinic site) endonuclease          | 35.5 | 112 | 7 | 2 | 2 | 4 | 220027073.3 |
| O14929 | HAT1    | Histone acetyltransferase type B catalytic subunit        | 49.5 | 94  | 7 | 2 | 2 | 2 | 6233844.5   |
| P62333 | PSMC6   | 26S proteasome regulatory subunit 10B                     | 44.1 | 79  | 7 | 2 | 2 | 2 | 8952334.5   |
| Q99873 | PRMT1   | Protein arginine N-methyltransferase 1                    | 42.4 | 78  | 7 | 2 | 2 | 2 | 8013396.75  |
| Q9P035 | HACD3   | Very-long-chain (3R)-3-hydroxyacyl-CoA dehydratase 3      | 43.1 | 71  | 7 | 2 | 2 | 2 | 7590247.75  |
| P06737 | PYGL    | Glycogen phosphorylase, liver form                        | 97.1 | 102 | 6 | 2 | 3 | 3 | 5217013.25  |
| Q9H0C8 | ILKAP   | Integrin-linked kinase-associated serine/threonine phosph | 42.9 | 84  | 6 | 2 | 2 | 2 | 555246      |
| Q9HAV0 | GNB4    | Guanine nucleotide-binding protein subunit beta-4         | 37.5 | 62  | 6 | 2 | 2 | 2 | 12054803    |
| P13489 | RNH1    | Ribonuclease inhibitor                                    | 49.9 | 60  | 6 | 2 | 2 | 2 | 8607313.25  |
| P06493 | CDK1    | Cyclin-dependent kinase 1                                 | 34.1 | 59  | 6 | 2 | 2 | 2 | 26145493    |
| O75874 | IDH1    | Isocitrate dehydrogenase [NADP] cytoplasmic               | 46.6 | 55  | 6 | 2 | 2 | 2 | 2614135.25  |
| Q00325 | SLC25A3 | Phosphate carrier protein, mitochondrial                  | 40.1 | 54  | 6 | 2 | 2 | 2 | 40295813    |
| P48735 | IDH2    | Isocitrate dehydrogenase [NADP], mitochondrial            | 50.9 | 43  | 6 | 2 | 2 | 2 | 4364945     |
| P50995 | ANXA11  | Annexin A11                                               | 54.4 | 42  | 6 | 2 | 2 | 2 | 4109689     |
| Q9Y265 | RUVBL1  | RuvB-like 1                                               | 50.2 | 39  | 6 | 2 | 2 | 2 | 12714800    |
| P15121 | AKR1B1  | Aldo-keto reductase family 1 member B1                    | 35.8 | 37  | 6 | 2 | 2 | 2 | 23139682    |
| Q9BV20 | MRI1    | Methylthioribose-1-phosphate isomerase                    | 39.1 | 36  | 6 | 2 | 2 | 2 | 10788652.75 |
| P49915 | GMPS    | GMP synthase [glutamine-hydrolyzing]                      | 76.7 | 152 | 5 | 2 | 2 | 3 | 7820966.75  |

|        |          |                                                      |       |     |   |   |   |   |             |
|--------|----------|------------------------------------------------------|-------|-----|---|---|---|---|-------------|
| P61221 | ABCE1    | ATP-binding cassette sub-family E member 1           | 67.3  | 106 | 5 | 2 | 2 | 2 | 2253009     |
| Q9UHB9 | SRP68    | Signal recognition particle subunit SRP68            | 70.7  | 91  | 5 | 2 | 2 | 2 | 6132342.25  |
| Q15758 | SLC1A5   | Neutral amino acid transporter B(0)                  | 56.6  | 81  | 5 | 2 | 2 | 2 | 3208796.25  |
| Q15046 | KARS1    | Lysine--tRNA ligase                                  | 68    | 76  | 5 | 2 | 2 | 2 | 5743760.5   |
| P33993 | MCM7     | DNA replication licensing factor MCM7                | 81.3  | 76  | 5 | 2 | 2 | 2 | 6351708.75  |
| P00734 | F2       | Prothrombin                                          | 70    | 71  | 5 | 2 | 2 | 2 | 4413048     |
| Q14498 | RBM39    | RNA-binding protein 39                               | 59.3  | 65  | 5 | 2 | 2 | 2 | 8691258.5   |
| P61160 | ACTR2    | Actin-related protein 2                              | 44.7  | 47  | 5 | 2 | 2 | 2 | 5991902     |
| P07237 | P4HB     | Protein disulfide-isomerase                          | 57.1  | 46  | 5 | 2 | 2 | 2 | 2109756     |
| P48444 | ARCN1    | Coatomer subunit delta                               | 57.2  | 46  | 5 | 2 | 2 | 2 | 8086343.25  |
| P05023 | ATP1A1   | Sodium/potassium-transporting ATPase subunit alpha-1 | 112.8 | 114 | 3 | 2 | 2 | 2 |             |
| P26639 | TARS1    | Threonine--tRNA ligase 1, cytoplasmic                | 83.4  | 97  | 3 | 2 | 2 | 2 | 7389461.625 |
| Q13200 | PSMD2    | 26S proteasome non-ATPase regulatory subunit 2       | 100.1 | 95  | 3 | 2 | 2 | 3 | 4072206.375 |
| P49591 | SARS1    | Serine--tRNA ligase, cytoplasmic                     | 58.7  | 84  | 3 | 2 | 2 | 2 | 8842737.875 |
| O95373 | IPO7     | Importin-7                                           | 119.4 | 78  | 3 | 2 | 2 | 2 | 759849.6875 |
| P43490 | NAMPT    | Nicotinamide phosphoribosyltransferase               | 55.5  | 62  | 3 | 2 | 2 | 2 | 9252771.5   |
| P13797 | PLS3     | Plastin-3                                            | 70.8  | 57  | 3 | 2 | 2 | 2 | 10786233    |
| Q16531 | DDB1     | DNA damage-binding protein 1                         | 126.9 | 46  | 3 | 2 | 2 | 2 | 3931207.25  |
| P26640 | VARs1    | Valine--tRNA ligase                                  | 140.4 | 77  | 2 | 2 | 2 | 2 | 73267270.75 |
| P55265 | ADAR     | Double-stranded RNA-specific adenosine deaminase     | 136   | 75  | 2 | 2 | 2 | 2 | 4694519.25  |
| P12814 | ACTN1    | Alpha-actinin-1                                      | 103   | 69  | 2 | 2 | 2 | 2 | 3366506.5   |
| O75643 | SNRNP200 | U5 small nuclear ribonucleoprotein 200 kDa helicase  | 244.4 | 64  | 2 | 2 | 2 | 2 | 1105709.75  |

|            |         |                                                         |       |     |    |   |   |   |             |
|------------|---------|---------------------------------------------------------|-------|-----|----|---|---|---|-------------|
| Q86VP6     | CAND1   | Cullin-associated NEDD8-dissociated protein 1           | 136.3 | 50  | 2  | 2 | 2 | 2 | 9906105     |
| P35579     | MYH9    | Myosin-9                                                | 226.4 | 57  | 1  | 2 | 2 | 2 | 6965459.75  |
| Q71DI3     | H3C15   | Histone H3.2                                            | 15.4  | 34  | 24 | 1 | 1 | 2 |             |
| P61204     | ARF3    | ADP-ribosylation factor 3                               | 20.6  | 135 | 22 | 1 | 3 | 3 | 7598234     |
| P31946     | YWHAB   | 14-3-3 protein beta/alpha                               | 28.1  | 113 | 15 | 1 | 3 | 3 | 645343.5625 |
| P13929     | ENO3    | Beta-enolase                                            | 47    | 389 | 14 | 1 | 4 | 6 | 31342040    |
| A0A0C4DH72 | IGKV1-6 | Immunoglobulin kappa variable 1-6                       | 12.7  | 35  | 14 | 1 | 1 | 1 | 17365038    |
| P61981     | YWHAG   | 14-3-3 protein gamma                                    | 28.3  | 127 | 13 | 1 | 3 | 3 | 5445280     |
| P06454     | PTMA    | Prothymosin alpha                                       | 12.2  | 52  | 13 | 1 | 1 | 1 | 4033580.5   |
| P56134     | ATP5MF  | ATP synthase subunit f, mitochondrial                   | 10.9  | 37  | 12 | 1 | 1 | 1 | 3153842     |
| O00487     | PSMD14  | 26S proteasome non-ATPase regulatory subunit 14         | 34.6  | 43  | 11 | 1 | 1 | 1 |             |
| P14406     | COX7A2  | Cytochrome c oxidase subunit 7A2, mitochondrial         | 9.4   | 24  | 11 | 1 | 1 | 1 | 1334592     |
| Q06830     | PRDX1   | Peroxiredoxin-1                                         | 22.1  | 66  | 10 | 1 | 2 | 2 | 14150475    |
| P81605     | DCD     | Dermcidin                                               | 11.3  | 25  | 10 | 1 | 1 | 1 |             |
| O14880     | MGST3   | Microsomal glutathione S-transferase 3                  | 16.5  | 88  | 9  | 1 | 1 | 1 | 3426874.75  |
| Q9NVQ4     | FAIM    | Fas apoptotic inhibitory molecule 1                     | 20.2  | 58  | 9  | 1 | 1 | 1 |             |
| Q13185     | CBX3    | Chromobox protein homolog 3                             | 20.8  | 51  | 9  | 1 | 1 | 1 | 1695501.875 |
| P52434     | POLR2H  | DNA-directed RNA polymerases I, II, and III subunit RPA | 17.1  | 38  | 9  | 1 | 1 | 1 | 2350833     |
| Q15056     | EIF4H   | Eukaryotic translation initiation factor 4H             | 27.4  | 57  | 8  | 1 | 1 | 1 | 2803987     |
| O60762     | DPM1    | Dolichol-phosphate mannosyltransferase subunit 1        | 29.6  | 39  | 8  | 1 | 1 | 1 | 1620260.875 |
| P14174     | MIF     | Macrophage migration inhibitory factor                  | 12.5  | 31  | 8  | 1 | 1 | 1 | 17117540    |
| A6NHL2     | TUBAL3  | Tubulin alpha chain-like 3                              | 49.9  | 122 | 7  | 1 | 3 | 4 | 5058086.5   |

|         |          |                                                     |      |    |   |   |   |   |             |
|---------|----------|-----------------------------------------------------|------|----|---|---|---|---|-------------|
| Q9UL25  | RAB21    | Ras-related protein Rab-21                          | 24.3 | 71 | 7 | 1 | 1 | 1 | 5168701     |
| P24534  | EEF1B2   | Elongation factor 1-beta                            | 24.7 | 69 | 7 | 1 | 1 | 1 | 21787794    |
| Q9NVS2  | MRPS18A  | 39S ribosomal protein S18a, mitochondrial           | 22.2 | 66 | 7 | 1 | 1 | 1 | 1034303.438 |
| O00299  | CLIC1    | Chloride intracellular channel protein 1            | 26.9 | 62 | 7 | 1 | 1 | 1 | 3482020.25  |
| P19623  | SRM      | Spermidine synthase                                 | 33.8 | 45 | 7 | 1 | 1 | 1 | 1288989.5   |
| P08134  | RHOC     | Rho-related GTP-binding protein RhoC                | 22   | 32 | 7 | 1 | 1 | 1 | 3005311.75  |
| Q9UKK9  | NUDT5    | ADP-sugar pyrophosphatase                           | 24.3 | 29 | 7 | 1 | 1 | 1 | 4451319     |
| P48047  | ATP5PO   | ATP synthase subunit O, mitochondrial               | 23.3 | 27 | 7 | 1 | 1 | 1 | 8115029     |
| Q9BYZ2  | LDHAL6B  | L-lactate dehydrogenase A-like 6B                   | 41.9 | 70 | 6 | 1 | 2 | 3 |             |
| O75396  | SEC22B   | Vesicle-trafficking protein SEC22b                  | 24.7 | 69 | 6 | 1 | 1 | 1 | 6193561     |
| P21266  | GSTM3    | Glutathione S-transferase Mu 3                      | 26.5 | 67 | 6 | 1 | 1 | 1 | 3063222.5   |
| P09972  | ALDOC    | Fructose-bisphosphate aldolase C                    | 39.4 | 64 | 6 | 1 | 1 | 1 | 4484634     |
| P12268  | IMPDH2   | Inosine-5'-monophosphate dehydrogenase 2            | 55.8 | 60 | 6 | 1 | 1 | 1 |             |
| P52907  | CAPZA1   | F-actin-capping protein subunit alpha-1             | 32.9 | 51 | 6 | 1 | 1 | 1 | 4515663     |
| P31930  | UQCRC1   | Cytochrome b-c1 complex subunit 1, mitochondrial    | 52.6 | 50 | 6 | 1 | 1 | 1 |             |
| Q16629  | SRSF7    | Serine/arginine-rich splicing factor 7              | 27.4 | 41 | 6 | 1 | 1 | 1 | 6294779     |
| P01706  | IGLV2-11 | Immunoglobulin lambda variable 2-11                 | 12.6 | 31 | 6 | 1 | 1 | 1 | 82753912    |
| Q16637  | SMN1     | Survival motor neuron protein                       | 31.8 | 30 | 6 | 1 | 1 | 1 | 2255687.75  |
| Q92665  | MRPS31   | 28S ribosomal protein S31, mitochondrial            | 45.3 | 24 | 6 | 1 | 1 | 1 | 987568.75   |
| Q12849  | GRSF1    | G-rich sequence factor 1                            | 53.1 | 76 | 5 | 1 | 1 | 1 | 1968221.5   |
| Q96C36  | PYCR2    | Pyrroline-5-carboxylate reductase 2                 | 33.6 | 75 | 5 | 1 | 1 | 1 |             |
| O96008  | TOMM40   | Mitochondrial import receptor subunit TOM40 homolog | 37.9 | 71 | 5 | 1 | 1 | 1 | 820417.3125 |
| Q9NQ T5 | EXOSC3   | Exosome complex component RRP40                     | 29.6 | 66 | 5 | 1 | 1 | 1 | 4340486.5   |

|        |          |                                                             |      |    |   |   |   |   |             |
|--------|----------|-------------------------------------------------------------|------|----|---|---|---|---|-------------|
| P35250 | RFC2     | Replication factor C subunit 2                              | 39.1 | 55 | 5 | 1 | 1 | 1 |             |
| Q9UBQ7 | GRHPR    | Glyoxylate reductase/hydroxypyruvate reductase              | 35.6 | 50 | 5 | 1 | 1 | 1 | 2501210.5   |
| Q15050 | RRS1     | Ribosome biogenesis regulatory protein homolog              | 41.2 | 48 | 5 | 1 | 1 | 1 | 1085017600  |
| Q14257 | RCN2     | Reticulocalbin-2                                            | 36.9 | 47 | 5 | 1 | 1 | 1 | 3226434.5   |
| P30520 | ADSS2    | Adenylosuccinate synthetase isozyme 2                       | 50.1 | 47 | 5 | 1 | 1 | 1 | 2043345.125 |
| P43897 | TSFM     | Elongation factor Ts, mitochondrial                         | 35.4 | 46 | 5 | 1 | 1 | 1 | 1633265.75  |
| P57088 | TMEM33   | Transmembrane protein 33                                    | 28   | 41 | 5 | 1 | 1 | 1 | 3913598     |
| P60900 | PSMA6    | Proteasome subunit alpha type-6                             | 27.4 | 40 | 5 | 1 | 1 | 1 | 2818280.25  |
| Q96CW1 | AP2M1    | AP-2 complex subunit mu                                     | 49.6 | 37 | 5 | 1 | 1 | 1 | 1711324     |
| P30048 | PRDX3    | Thioredoxin-dependent peroxide reductase, mitochondrial     | 27.7 | 37 | 5 | 1 | 1 | 1 | 3517441.25  |
| P62714 | PPP2CB   | Serine/threonine-protein phosphatase 2A catalytic subunit   | 35.6 | 36 | 5 | 1 | 1 | 1 | 1705104.125 |
| Q5XKP0 | MICOS13  | MICOS complex subunit MIC13                                 | 13.1 | 28 | 5 | 1 | 1 | 1 | 920486.625  |
| Q9Y4Z0 | LSM4     | U6 snRNA-associated Sm-like protein LSm4                    | 15.3 | 26 | 5 | 1 | 1 | 1 | 3451556.75  |
| Q13595 | TRA2A    | Transformer-2 protein homolog alpha                         | 32.7 | 25 | 5 | 1 | 1 | 1 | 3053881.75  |
| Q16186 | ADRM1    | Proteasomal ubiquitin receptor ADRM1                        | 42.1 | 65 | 4 | 1 | 1 | 1 | 1796114     |
| P40925 | MDH1     | Malate dehydrogenase, cytoplasmic                           | 36.4 | 54 | 4 | 1 | 1 | 1 | 3681855     |
| Q15102 | PAFAH1B3 | Platelet-activating factor acetylhydrolase IB subunit alpha | 25.7 | 51 | 4 | 1 | 1 | 1 | 4717042.5   |
| P30041 | PRDX6    | Peroxiredoxin-6                                             | 25   | 43 | 4 | 1 | 1 | 1 | 2029202.5   |
| O76003 | GLRX3    | Glutaredoxin-3                                              | 37.4 | 40 | 4 | 1 | 1 | 1 | 3300081.25  |
| P68402 | PAFAH1B2 | Platelet-activating factor acetylhydrolase IB subunit alpha | 25.6 | 39 | 4 | 1 | 1 | 1 | 1692729.75  |
| P17980 | PSMC3    | 26S proteasome regulatory subunit 6A                        | 49.2 | 38 | 4 | 1 | 1 | 1 | 1648111.25  |
| Q9UJZ1 | STOML2   | Stomatin-like protein 2, mitochondrial                      | 38.5 | 37 | 4 | 1 | 1 | 1 |             |



|        |          |                                                        |       |     |   |   |   |   |             |
|--------|----------|--------------------------------------------------------|-------|-----|---|---|---|---|-------------|
| P50395 | GDI2     | Rab GDP dissociation inhibitor beta                    | 50.6  | 34  | 4 | 1 | 1 | 1 |             |
| P00403 | MT-CO2   | Cytochrome c oxidase subunit 2                         | 25.5  | 30  | 4 | 1 | 1 | 1 | 5288784     |
| Q9BQA1 | WDR77    | Methylosome protein 50                                 | 36.7  | 30  | 4 | 1 | 1 | 1 | 5522065     |
| Q12765 | SCRN1    | Secernin-1                                             | 46.4  | 29  | 4 | 1 | 1 | 1 |             |
| P53007 | SLC25A1  | Tricarboxylate transport protein, mitochondrial        | 34    | 27  | 4 | 1 | 1 | 1 | 3009174.75  |
| Q14558 | PRPSAP1  | Phosphoribosyl pyrophosphate synthase-associated prote | 39.4  | 23  | 4 | 1 | 1 | 1 | 1587866.375 |
| Q9H9J2 | MRPL44   | 39S ribosomal protein L44, mitochondrial               | 37.5  | 23  | 4 | 1 | 1 | 1 |             |
| P41250 | GARS1    | Glycine--tRNA ligase                                   | 83.1  | 158 | 3 | 1 | 1 | 2 | 1844549.5   |
| O43242 | PSMD3    | 26S proteasome non-ATPase regulatory subunit 3         | 60.9  | 108 | 3 | 1 | 1 | 2 | 5523251.75  |
| Q9UMR2 | DDX19B   | ATP-dependent RNA helicase DDX19B                      | 53.9  | 87  | 3 | 1 | 1 | 1 | 1527581.875 |
| P11216 | PYGB     | Glycogen phosphorylase, brain form                     | 96.6  | 83  | 3 | 1 | 2 | 2 | 2584958     |
| P27169 | PON1     | Serum paraoxonase/arylesterase 1                       | 39.7  | 77  | 3 | 1 | 1 | 2 | 75924042    |
| O00232 | PSMD12   | 26S proteasome non-ATPase regulatory subunit 12        | 52.9  | 71  | 3 | 1 | 1 | 1 | 2016867.875 |
| Q3SXM5 | HSDL1    | Inactive hydroxysteroid dehydrogenase-like protein 1   | 37    | 67  | 3 | 1 | 1 | 1 | 812361.4375 |
| P27824 | CANX     | Calnexin                                               | 67.5  | 66  | 3 | 1 | 1 | 1 |             |
| Q14739 | LBR      | Delta(14)-sterol reductase LBR                         | 70.7  | 65  | 3 | 1 | 1 | 1 | 5269150.5   |
| Q9UJS0 | SLC25A13 | Calcium-binding mitochondrial carrier protein Aralar2  | 74.1  | 64  | 3 | 1 | 1 | 1 | 719684.1875 |
| P35998 | PSMC2    | 26S proteasome regulatory subunit 7                    | 48.6  | 55  | 3 | 1 | 1 | 1 | 5291414.5   |
| P78347 | GTF2I    | General transcription factor II-I                      | 112.3 | 53  | 3 | 1 | 1 | 1 | 1254423.125 |
| Q9Y5K5 | UCHL5    | Ubiquitin carboxyl-terminal hydrolase isozyme L5       | 37.6  | 52  | 3 | 1 | 1 | 1 | 966898.0625 |
| O75083 | WDR1     | WD repeat-containing protein 1                         | 66.2  | 52  | 3 | 1 | 1 | 1 | 3679914.25  |
| O00154 | ACOT7    | Cytosolic acyl coenzyme A thioester hydrolase          | 41.8  | 47  | 3 | 1 | 1 | 1 | 4622503     |

|        |         |                                                          |       |     |   |   |   |   |             |
|--------|---------|----------------------------------------------------------|-------|-----|---|---|---|---|-------------|
| P62191 | PSMC1   | 26S proteasome regulatory subunit 4                      | 49.2  | 45  | 3 | 1 | 1 | 1 | 4269369.5   |
| P55010 | EIF5    | Eukaryotic translation initiation factor 5               | 49.2  | 43  | 3 | 1 | 1 | 1 | 1040244.75  |
| P13861 | PRKAR2A | cAMP-dependent protein kinase type II-alpha regulatory s | 45.5  | 39  | 3 | 1 | 1 | 1 | 1158570.625 |
| P53582 | METAP1  | Methionine aminopeptidase 1                              | 43.2  | 38  | 3 | 1 | 1 | 1 |             |
| P48382 | RFX5    | DNA-binding protein RFX5                                 | 65.3  | 38  | 3 | 1 | 1 | 1 | 704025.5    |
| P41240 | CSK     | Tyrosine-protein kinase CSK                              | 50.7  | 36  | 3 | 1 | 1 | 1 | 1721485.5   |
| O75955 | FLOT1   | Flotillin-1                                              | 47.3  | 33  | 3 | 1 | 1 | 1 | 1182583.625 |
| Q96KP4 | CNDP2   | Cytosolic non-specific dipeptidase                       | 52.8  | 33  | 3 | 1 | 1 | 1 | 484485.9063 |
| P05198 | EIF2S1  | Eukaryotic translation initiation factor 2 subunit 1     | 36.1  | 32  | 3 | 1 | 1 | 1 | 1183472.875 |
| Q6P1J9 | CDC73   | Parafibromin                                             | 60.5  | 29  | 3 | 1 | 1 | 1 | 1197483.5   |
| O00442 | RTCA    | RNA 3'-terminal phosphate cyclase                        | 39.3  | 24  | 3 | 1 | 1 | 1 |             |
| Q53GS9 | USP39   | U4/U6.U5 tri-snRNP-associated protein 2                  | 65.3  | 22  | 3 | 1 | 1 | 1 |             |
| P31040 | SDHA    | Succinate dehydrogenase [ubiquinone] flavoprotein subun  | 72.6  | 127 | 2 | 1 | 1 | 1 |             |
| Q08945 | SSRP1   | FACT complex subunit SSRP1                               | 81    | 55  | 2 | 1 | 1 | 1 | 4621388     |
| Q9NRW7 | VPS45   | Vacuolar protein sorting-associated protein 45           | 65    | 53  | 2 | 1 | 1 | 1 | 778508.3125 |
| P63010 | AP2B1   | AP-2 complex subunit beta                                | 104.5 | 53  | 2 | 1 | 1 | 1 |             |
| Q6P4Q7 | CNNM4   | Metal transporter CNNM4                                  | 86.6  | 51  | 2 | 1 | 1 | 1 | 3983875.5   |
| P18754 | RCC1    | Regulator of chromosome condensation                     | 44.9  | 45  | 2 | 1 | 1 | 1 | 6983288.5   |
| P10155 | RO60    | 60 kDa SS-A/Ro ribonucleoprotein                         | 60.6  | 44  | 2 | 1 | 1 | 1 | 3421549.75  |
| P56545 | CTBP2   | C-terminal-binding protein 2                             | 48.9  | 43  | 2 | 1 | 1 | 1 | 7677481     |
| O00505 | KPNA3   | Importin subunit alpha-4                                 | 57.8  | 42  | 2 | 1 | 1 | 1 | 1132129.875 |
| Q96T37 | RBM15   | RNA-binding protein 15                                   | 107.1 | 42  | 2 | 1 | 1 | 1 |             |

|        |         |                                                           |       |    |   |   |   |   |             |
|--------|---------|-----------------------------------------------------------|-------|----|---|---|---|---|-------------|
| P14923 | JUP     | Junction plakoglobin                                      | 81.7  | 41 | 2 | 1 | 1 | 1 |             |
| P36957 | DLST    | Dihydrolipoyllysine-residue succinyltransferase componen  | 48.7  | 41 | 2 | 1 | 1 | 1 | 4379225     |
| Q15645 | TRIP13  | Pachytene checkpoint protein 2 homolog                    | 48.5  | 40 | 2 | 1 | 1 | 1 | 4016814     |
| P33992 | MCM5    | DNA replication licensing factor MCM5                     | 82.2  | 40 | 2 | 1 | 1 | 1 | 2800414.5   |
| Q15436 | SEC23A  | Protein transport protein Sec23A                          | 86.1  | 39 | 2 | 1 | 1 | 1 | 3622323.75  |
| P30837 | ALDH1B1 | Aldehyde dehydrogenase X, mitochondrial                   | 57.2  | 38 | 2 | 1 | 1 | 1 |             |
| P55060 | CSE1L   | Exportin-2                                                | 110.3 | 37 | 2 | 1 | 1 | 1 |             |
| P33176 | KIF5B   | Kinesin-1 heavy chain                                     | 109.6 | 36 | 2 | 1 | 1 | 1 |             |
| P56192 | MARS1   | Methionine--tRNA ligase, cytoplasmic                      | 101.1 | 34 | 2 | 1 | 1 | 1 | 3237876.75  |
| Q8WVM8 | SCFD1   | Sec1 family domain-containing protein 1                   | 72.3  | 34 | 2 | 1 | 1 | 1 | 1905743     |
| P33991 | MCM4    | DNA replication licensing factor MCM4                     | 96.5  | 33 | 2 | 1 | 1 | 1 | 568122.5625 |
| Q9H9T3 | ELP3    | Elongator complex protein 3                               | 62.2  | 33 | 2 | 1 | 1 | 1 |             |
| P35611 | ADD1    | Alpha-adducin                                             | 80.9  | 33 | 2 | 1 | 1 | 1 |             |
| Q15291 | RBBP5   | Retinoblastoma-binding protein 5                          | 59.1  | 32 | 2 | 1 | 1 | 1 |             |
| P14868 | DARS1   | Aspartate--tRNA ligase, cytoplasmic                       | 57.1  | 31 | 2 | 1 | 1 | 1 | 4917642     |
| P35520 | CBS     | Cystathionine beta-synthase                               | 60.5  | 30 | 2 | 1 | 1 | 1 | 2073406.5   |
| Q9NPQ8 | RIC8A   | Synembryn-A                                               | 59.7  | 30 | 2 | 1 | 1 | 1 | 576408.5    |
| Q14145 | KEAP1   | Kelch-like ECH-associated protein 1                       | 69.6  | 29 | 2 | 1 | 1 | 1 | 16070964    |
| P49643 | PRIM2   | DNA primase large subunit                                 | 58.8  | 28 | 2 | 1 | 1 | 1 | 1173046.375 |
| Q9UBT2 | UBA2    | SUMO-activating enzyme subunit 2                          | 71.2  | 28 | 2 | 1 | 1 | 1 | 4652618.5   |
| P54578 | USP14   | Ubiquitin carboxyl-terminal hydrolase 14                  | 56    | 28 | 2 | 1 | 1 | 1 | 1366149.75  |
| Q9NQW7 | XPNPEP1 | Xaa-Pro aminopeptidase 1                                  | 69.9  | 27 | 2 | 1 | 1 | 1 |             |
| P46977 | STT3A   | Dolichyl-diphosphooligosaccharide--protein glycosyltransf | 80.5  | 27 | 2 | 1 | 1 | 1 |             |

|        |          |                                                          |       |    |   |   |   |   |             |
|--------|----------|----------------------------------------------------------|-------|----|---|---|---|---|-------------|
| O43929 | ORC4     | Origin recognition complex subunit 4                     | 50.3  | 26 | 2 | 1 | 1 | 1 |             |
| O94808 | GFPT2    | Glutamine--fructose-6-phosphate aminotransferase [isome  | 76.9  | 26 | 2 | 1 | 1 | 1 | 654845      |
| P08195 | SLC3A2   | 4F2 cell-surface antigen heavy chain                     | 68    | 25 | 2 | 1 | 1 | 1 | 1926039.75  |
| Q6NVY1 | HIBCH    | 3-hydroxyisobutyryl-CoA hydrolase, mitochondrial         | 43.5  | 24 | 2 | 1 | 1 | 1 | 2477920     |
| O75390 | CS       | Citrate synthase, mitochondrial                          | 51.7  | 24 | 2 | 1 | 1 | 1 | 4235922.5   |
| Q8WTT2 | NOC3L    | Nucleolar complex protein 3 homolog                      | 92.5  | 23 | 2 | 1 | 1 | 1 | 909306.375  |
| P43246 | MSH2     | DNA mismatch repair protein Msh2                         | 104.7 | 80 | 1 | 1 | 1 | 1 | 1124893.875 |
| Q99460 | PSMD1    | 26S proteasome non-ATPase regulatory subunit 1           | 105.8 | 72 | 1 | 1 | 1 | 1 | 2243860.75  |
| P42704 | LRPPRC   | Leucine-rich PPR motif-containing protein, mitochondrial | 157.8 | 67 | 1 | 1 | 1 | 1 | 1173530.125 |
| P00450 | CP       | Ceruloplasmin                                            | 122.1 | 65 | 1 | 1 | 1 | 1 | 2427498.25  |
| Q9Y4L1 | HYOU1    | Hypoxia up-regulated protein 1                           | 111.3 | 65 | 1 | 1 | 1 | 1 | 1208369     |
| Q9Y2L1 | DIS3     | Exosome complex exonuclease RRP44                        | 108.9 | 60 | 1 | 1 | 1 | 1 | 3172484.5   |
| Q68EM7 | ARHGAP17 | Rho GTPase-activating protein 17                         | 95.4  | 59 | 1 | 1 | 1 | 1 |             |
| Q8WUM4 | PDCD6IP  | Programmed cell death 6-interacting protein              | 96    | 54 | 1 | 1 | 1 | 1 |             |
| P53992 | SEC24C   | Protein transport protein Sec24C                         | 118.2 | 51 | 1 | 1 | 1 | 1 | 1177476.5   |
| P08133 | ANXA6    | Annexin A6                                               | 75.8  | 47 | 1 | 1 | 1 | 1 | 1612213.375 |
| Q13620 | CUL4B    | Cullin-4B                                                | 103.9 | 46 | 1 | 1 | 1 | 1 | 1019978     |
| Q9BVJ6 | UTP14A   | U3 small nucleolar RNA-associated protein 14 homolog A   | 87.9  | 41 | 1 | 1 | 1 | 1 | 1918060.5   |
| Q7L014 | DDX46    | Probable ATP-dependent RNA helicase DDX46                | 117.3 | 40 | 1 | 1 | 1 | 1 |             |
| O43747 | AP1G1    | AP-1 complex subunit gamma-1                             | 91.3  | 39 | 1 | 1 | 1 | 1 | 1506611     |
| P53618 | COPB1    | Coatomer subunit beta                                    | 107.1 | 39 | 1 | 1 | 1 | 1 |             |
| O95782 | AP2A1    | AP-2 complex subunit alpha-1                             | 107.5 | 39 | 1 | 1 | 1 | 1 |             |

|        |           |                                                         |       |    |   |   |   |   |             |
|--------|-----------|---------------------------------------------------------|-------|----|---|---|---|---|-------------|
| Q13045 | FLII      | Protein flightless-1 homolog                            | 144.7 | 39 | 1 | 1 | 1 | 1 | 1046191.5   |
| Q9Y3T9 | NOC2L     | Nucleolar complex protein 2 homolog                     | 84.9  | 39 | 1 | 1 | 1 | 1 | 1371463.25  |
| Q9NQH7 | XPNPEP3   | Xaa-Pro aminopeptidase 3                                | 57    | 38 | 1 | 1 | 1 | 1 | 27984678    |
| Q9HAV4 | XPO5      | Exportin-5                                              | 136.2 | 36 | 1 | 1 | 1 | 1 |             |
| Q14974 | KPNB1     | Importin subunit beta-1                                 | 97.1  | 36 | 1 | 1 | 1 | 1 | 1610898.75  |
| Q9BPX3 | NCAPG     | Condensin complex subunit 3                             | 114.3 | 35 | 1 | 1 | 1 | 1 |             |
| O00159 | MYO1C     | Unconventional myosin-Ic                                | 121.6 | 35 | 1 | 1 | 1 | 1 |             |
| Q6PI48 | DARS2     | Aspartate--tRNA ligase, mitochondrial                   | 73.5  | 35 | 1 | 1 | 1 | 1 | 2541134.5   |
| Q8TEX9 | IPO4      | Importin-4                                              | 118.6 | 35 | 1 | 1 | 1 | 1 |             |
| Q01813 | PFKP      | ATP-dependent 6-phosphofructokinase, platelet type      | 85.5  | 34 | 1 | 1 | 1 | 1 | 2369671.25  |
| P52701 | MSH6      | DNA mismatch repair protein Msh6                        | 152.7 | 34 | 1 | 1 | 1 | 1 | 1696498.25  |
| Q86YS3 | RAB11FIP4 | Rab11 family-interacting protein 4                      | 71.9  | 33 | 1 | 1 | 1 | 1 | 2897770.75  |
| P28331 | NDUFS1    | NADH-ubiquinone oxidoreductase 75 kDa subunit, mitoch   | 79.4  | 32 | 1 | 1 | 1 | 1 | 4429126.5   |
| P19367 | HK1       | Hexokinase-1                                            | 102.4 | 30 | 1 | 1 | 1 | 1 | 6765532.5   |
| Q9C0C9 | UBE2O     | (E3-independent) E2 ubiquitin-conjugating enzyme        | 141.2 | 29 | 1 | 1 | 1 | 1 | 834833.8125 |
| O95347 | SMC2      | Structural maintenance of chromosomes protein 2         | 135.6 | 29 | 1 | 1 | 1 | 1 | 1851995.25  |
| P35606 | COPB2     | Coatomer subunit beta'                                  | 102.4 | 27 | 1 | 1 | 1 | 1 | 5704954     |
| O60299 | LZTS3     | Leucine zipper putative tumor suppressor 3              | 71.7  | 27 | 1 | 1 | 1 | 1 | 8168197.5   |
| P49189 | ALDH9A1   | 4-trimethylaminobutyraldehyde dehydrogenase             | 53.8  | 26 | 1 | 1 | 1 | 1 | 6977843     |
| Q5BKZ1 | ZNF326    | DBIRD complex subunit ZNF326                            | 65.6  | 25 | 1 | 1 | 1 | 1 | 4168504.25  |
| Q15020 | SART3     | Squamous cell carcinoma antigen recognized by T-cells 3 | 109.9 | 25 | 1 | 1 | 1 | 1 |             |
| O60763 | USO1      | General vesicular transport factor p115                 | 107.8 | 23 | 1 | 1 | 1 | 1 | 1429639.875 |



Q9Y4W6 AFG3L2 AFG3-like protein 2 88.5 20 1 1 1 1 3175201.75

**Table S4. Related to Figure 5; USP48 interacting proteins**

| Accession  | Description                                                                                                        | Gene_names | #PepCount | #UniquePepCount | CoverPercent | MW [kDa]  | PI   |
|------------|--------------------------------------------------------------------------------------------------------------------|------------|-----------|-----------------|--------------|-----------|------|
| P35579     | sp P35579 MYH9_HUMAN Myosin-9 OS=Homo sapiens OX=9606 GN=MYH9 PE=1 SV=4                                            | MYH9       | 75        | 61              | 33.320%      | 226529.66 | 5.5  |
| Q86UV5     | sp Q86UV5 UBP48_HUMAN Ubiquitin carboxyl-terminal hydrolase 48 OS=Homo sapiens OX=9606 GN=USP48 PE=1 SV=1          | USP48      | 102       | 58              | 57.290%      | 119030.99 | 5.75 |
| P56524     | sp P56524 HDAC4_HUMAN Histone deacetylase 4 OS=Homo sapiens OX=9606 GN=HDAC4 PE=1 SV=3                             | HDAC4      | 121       | 57              | 60.240%      | 119038.31 | 6.49 |
| B2R9F5     | tr B2R9F5 B2R9F5_HUMAN cDNA, FLJ94365 OS=Homo sapiens OX=9606 PE=2 SV=1                                            |            | 98        | 57              | 71.130%      | 86693.03  | 9.26 |
| A0A0U4BW16 | tr A0A0U4BW16 A0A0U4BW16_HUMAN Non-muscle myosin heavy chain 9 OS=Homo sapiens OX=9606 GN=MYH9 PE=2 SV=1           | MYH9       | 68        | 55              | 29.440%      | 226514.51 | 5.43 |
| P09874     | sp P09874 PARP1_HUMAN Poly [ADP-ribose] polymerase 1 OS=Homo sapiens OX=9606 GN=PARP1 PE=1 SV=4                    | PARP1      | 71        | 52              | 46.550%      | 113082.48 | 8.99 |
| Q8WUI4     | sp Q8WUI4 HDAC7_HUMAN Histone deacetylase 7 OS=Homo sapiens OX=9606 GN=HDAC7 PE=1 SV=2                             | HDAC7      | 96        | 43              | 51.890%      | 102925.99 | 7.24 |
| Q00839     | sp Q00839 HNRPU_HUMAN Heterogeneous nuclear ribonucleoprotein U OS=Homo sapiens OX=9606 GN=HNRNPU HNRNPU PE=1 SV=6 | HNRNPU     | 60        | 40              | 50.300%      | 90583.42  | 5.76 |
| A0A7I2V428 | tr A0A7I2V428 A0A7I2V428_HUMAN Nucleolin OS=Homo sapiens OX=9606 GN=NCL PE=1 SV=1                                  | NCL        | 46        | 37              | 43.540%      | 74739.48  | 4.55 |

|            |                                                                                                                                    |           |    |    |         |           |       |
|------------|------------------------------------------------------------------------------------------------------------------------------------|-----------|----|----|---------|-----------|-------|
| P07900     | sp P07900 HS90A_HUMAN Heat shock protein HSP 90-alpha<br>OS=Homo sapiens OX=9606 GN=HSP90AA1 PE=1 SV=5                             | HSP90AA1  | 45 | 34 | 46.170% | 84658.73  | 4.94  |
| P08238     | sp P08238 HS90B_HUMAN Heat shock protein HSP 90-beta<br>OS=Homo sapiens OX=9606 GN=HSP90AB1 PE=1 SV=4                              | HSP90AB1  | 40 | 34 | 47.790% | 83263.22  | 4.97  |
| Q92499     | sp Q92499 DDX1_HUMAN ATP-dependent RNA helicase DDX1<br>OS=Homo sapiens OX=9606 GN=DDX1 PE=1 SV=2                                  | DDX1      | 42 | 32 | 47.030% | 82431.21  | 6.8   |
| P49327     | sp P49327 FAS_HUMAN Fatty acid synthase OS=Homo<br>sapiens OX=9606 GN=FASN PE=1 SV=3                                               | FASN      | 32 | 31 | 15.530% | 273423.4  | 6.01  |
| P11142     | sp P11142 HSP7C_HUMAN Heat shock cognate 71 kDa protein<br>OS=Homo sapiens OX=9606 GN=HSPA8 PE=1 SV=1                              | HSPA8     | 40 | 29 | 45.670% | 70897.24  | 5.37  |
| Q9Y2W1     | sp Q9Y2W1 TR150_HUMAN Thyroid hormone receptor-<br>associated protein 3 OS=Homo sapiens OX=9606 GN=THRAP3<br>PE=1 SV=2             | THRAP3    | 35 | 28 | 25.970% | 108664.45 | 10.16 |
| O75643     | sp O75643 U520_HUMAN U5 small nuclear ribonucleoprotein<br>200 kDa helicase OS=Homo sapiens OX=9606 GN=SNRNP200<br>PE=1 SV=2       | SNRNP200  | 29 | 28 | 14.470% | 244504.79 | 5.73  |
| A0A024R5M9 | tr A0A024R5M9 A0A024R5M9_HUMAN Nuclear mitotic<br>apparatus protein 1, isoform CRA_a OS=Homo sapiens<br>OX=9606 GN=NUMA1 PE=4 SV=1 | NUMA1     | 29 | 28 | 15.900% | 236512.79 | 5.64  |
| P23246     | sp P23246 SFPQ_HUMAN Splicing factor, proline- and<br>glutamine-rich OS=Homo sapiens OX=9606 GN=SFPQ<br>PE=1 SV=2                  | SFPQ      | 36 | 25 | 32.250% | 76148.51  | 9.45  |
| P08670     | sp P08670 VIME_HUMAN Vimentin OS=Homo sapiens<br>OX=9606 GN=VIM PE=1 SV=4                                                          | VIM       | 29 | 25 | 47.000% | 53651.05  | 5.06  |
| A0A7I2V5Y7 | tr A0A7I2V5Y7 A0A7I2V5Y7_HUMAN Non-POU domain-<br>containing octamer-binding protein OS=Homo sapiens<br>OX=9606 GN=NONO PE=1 SV=1  | NONO      | 34 | 24 | 42.020% | 54825.68  | 8.85  |
| A8K5I0     | tr A8K5I0 A8K5I0_HUMAN Epididymis secretory protein Li 103<br>OS=Homo sapiens OX=9606 GN=HEL-S-103 PE=2 SV=1                       | HEL-S-103 | 33 | 24 | 43.680% | 70051.38  | 5.48  |
| Q6P2Q9     | sp Q6P2Q9 PRP8_HUMAN Pre-mRNA-processing-splicing<br>factor 8 OS=Homo sapiens OX=9606 GN=PRPF8 PE=1 SV=2                           | PRPF8     | 25 | 24 | 9.720%  | 273597.13 | 8.95  |

|            |                                                                                                                        |         |    |    |         |           |       |
|------------|------------------------------------------------------------------------------------------------------------------------|---------|----|----|---------|-----------|-------|
| P39023     | sp P39023 RL3_HUMAN 60S ribosomal protein L3 OS=Homo sapiens OX=9606 GN=RPL3 PE=1 SV=2                                 | RPL3    | 29 | 22 | 50.120% | 46108.35  | 10.19 |
| O76021     | sp O76021 RL1D1_HUMAN Ribosomal L1 domain-containing protein 1 OS=Homo sapiens OX=9606 GN=RSL1D1 PE=1 SV=3             | RSL1D1  | 24 | 22 | 41.020% | 54971.83  | 10.13 |
| Q9BQG0     | sp Q9BQG0 MBB1A_HUMAN Myb-binding protein 1A OS=Homo sapiens OX=9606 GN=MYBBP1A PE=1 SV=2                              | MYBBP1A | 24 | 21 | 16.340% | 148852.77 | 9.34  |
| A0A024R1N4 | tr A0A024R1N4 A0A024R1N4_HUMAN ATP-dependent DNA helicase 2 subunit 1 OS=Homo sapiens OX=9606 GN=XRCC6 XRCC6 PE=3 SV=1 | XRCC6   | 24 | 21 | 30.050% | 69842.23  | 6.23  |
| H7BXY3     | tr H7BXY3 H7BXY3_HUMAN RNA helicase OS=Homo sapiens OX=9606 GN=DHX30 PE=1 SV=1                                         | DHX30   | 23 | 21 | 19.380% | 130548.66 | 8.8   |
| Q53SY7     | tr Q53SY7 Q53SY7_HUMAN Aspartate carbamoyltransferase (Fragment) OS=Homo sapiens OX=9606 GN=CAD PE=3 SV=1              | CAD     | 22 | 21 | 10.930% | 235175.06 | 6.15  |
| P53621     | sp P53621 COPA_HUMAN Coatomer subunit alpha OS=Homo sapiens OX=9606 GN=COPA PE=1 SV=2                                  | COPA    | 21 | 21 | 18.060% | 138344.15 | 7.7   |
| Q00610     | sp Q00610 CLH1_HUMAN Clathrin heavy chain 1 OS=Homo sapiens OX=9606 GN=CLTC PE=1 SV=5                                  | CLTC    | 21 | 21 | 14.510% | 191612.41 | 5.48  |
| F4ZW66     | tr F4ZW66 F4ZW66_HUMAN NF110b OS=Homo sapiens OX=9606 PE=2 SV=1                                                        | NF110b  | 24 | 20 | 23.160% | 95776.73  | 8.9   |
| J3KTA4     | tr J3KTA4 J3KTA4_HUMAN DEAD box protein 5 OS=Homo sapiens OX=9606 GN=DDX5 PE=1 SV=1                                    | DDX5    | 23 | 20 | 32.410% | 69086.33  | 9.01  |
| H0YAR2     | tr H0YAR2 H0YAR2_HUMAN Polyadenylate-binding protein OS=Homo sapiens OX=9606 GN=PABPC1 PE=1 SV=2                       | PABPC1  | 22 | 20 | 33.720% | 66649.4   | 9.31  |
| Q7Z406     | sp Q7Z406 MYH14_HUMAN Myosin-14 OS=Homo sapiens OX=9606 GN=MYH14 PE=1 SV=2                                             | MYH14   | 21 | 20 | 10.230% | 227867.88 | 5.52  |
| Q9H583     | sp Q9H583 HEAT1_HUMAN HEAT repeat-containing protein 1 OS=Homo sapiens OX=9606 GN=HEATR1 PE=1 SV=3                     | HEATR1  | 20 | 20 | 10.400% | 242367.36 | 6.11  |

|            |                                                                                                                                     |           |    |    |         |           |       |
|------------|-------------------------------------------------------------------------------------------------------------------------------------|-----------|----|----|---------|-----------|-------|
| P36578     | sp P36578 RL4_HUMAN 60S ribosomal protein L4 OS=Homo sapiens OX=9606 GN=RPL4 PE=1 SV=5                                              | RPL4      | 25 | 19 | 45.200% | 47696.77  | 11.07 |
| P13010     | sp P13010 XRCC5_HUMAN X-ray repair cross-complementing protein 5 OS=Homo sapiens OX=9606 GN=XRCC5 PE=1 SV=3                         | XRCC5     | 22 | 19 | 24.180% | 82703.57  | 5.55  |
| P68363     | sp P68363 TUBA1B_HUMAN Tubulin alpha-1B chain OS=Homo sapiens OX=9606 GN=TUBA1B PE=1 SV=1                                           | TUBA1B    | 24 | 18 | 44.790% | 50151.07  | 4.94  |
| A0A2R8Y5G6 | tr A0A2R8Y5G6 A0A2R8Y5G6_HUMAN RNA helicase OS=Homo sapiens OX=9606 GN=DDX3X PE=1 SV=1                                              | DDX3X     | 24 | 18 | 32.960% | 69047.05  | 7.21  |
| Q9H0A0     | sp Q9H0A0 NAT10_HUMAN RNA cytidine acetyltransferase OS=Homo sapiens OX=9606 GN=NAT10 PE=1 SV=2                                     | NAT10     | 21 | 18 | 19.510% | 115728.51 | 8.5   |
| P14625     | sp P14625 ENPL_HUMAN Endoplasmic reticulum protein OS=Homo sapiens OX=9606 GN=HSP90B1 PE=1 SV=1                                     | HSP90B1   | 19 | 18 | 20.800% | 92467.76  | 4.76  |
| P20700     | sp P20700 LMNB1_HUMAN Lamin-B1 OS=Homo sapiens OX=9606 GN=LMNB1 PE=1 SV=2                                                           | LMNB1     | 19 | 18 | 26.280% | 66407.58  | 5.11  |
| O43390     | sp O43390 HNRPR_HUMAN Heterogeneous nuclear ribonucleoprotein R OS=Homo sapiens OX=9606 GN=HNRNPR PE=1 SV=1                         | HNRNPR    | 18 | 18 | 28.590% | 70942.21  | 8.23  |
| A0A804HL40 | tr A0A804HL40 A0A804HL40_HUMAN Leucine-rich PPR motif-containing protein, mitochondrial OS=Homo sapiens OX=9606 GN=LRPPRC PE=4 SV=1 | LRPPRC    | 18 | 18 | 13.570% | 157774.1  | 5.85  |
| A0A024RBK3 | tr A0A024RBK3 A0A024RBK3_HUMAN 60S ribosomal protein L6 OS=Homo sapiens OX=9606 GN=RPL6 PE=3 SV=1                                   | RPL6      | 25 | 17 | 46.530% | 32727.51  | 10.59 |
| A0A7I2V3P1 | tr A0A7I2V3P1 A0A7I2V3P1_HUMAN Heterogeneous nuclear ribonucleoproteins A2/B1 OS=Homo sapiens OX=9606 GN=HNRNPA2B1 PE=1 SV=1        | HNRNPA2B1 | 23 | 17 | 46.930% | 33270.83  | 8.41  |
| B7Z475     | tr B7Z475 B7Z475_HUMAN cDNA FLJ55712, highly similar to F-box-like/WD repeat protein TBL1XR1 OS=Homo sapiens OX=9606 PE=2 SV=1      | TBL1XR1   | 21 | 17 | 49.730% | 40755.92  | 6.34  |
| P21333     | sp P21333 FLNA_HUMAN Filamin-A OS=Homo sapiens OX=9606 GN=FLNA PE=1 SV=4                                                            | FLNA      | 18 | 17 | 7.250%  | 280735.67 | 5.7   |

|        |                                                                                                                                                                  |           |    |    |         |           |      |
|--------|------------------------------------------------------------------------------------------------------------------------------------------------------------------|-----------|----|----|---------|-----------|------|
| Q5SU16 | tr Q5SU16 Q5SU16_HUMAN Tubulin beta chain OS=Homo sapiens OX=9606 GN=TUBB PE=1 SV=1                                                                              | TUBB      | 27 | 16 | 40.990% | 49670.28  | 4.78 |
| Q1KLZ0 | tr Q1KLZ0 Q1KLZ0_HUMAN HCG15971, isoform CRA_a OS=Homo sapiens OX=9606 GN=PS1TP5BP1 PE=1 SV=1                                                                    | PS1TP5BP1 | 19 | 16 | 44.530% | 41736.29  | 5.29 |
| Q1KMD3 | sp Q1KMD3 HNRL2_HUMAN Heterogeneous nuclear ribonucleoprotein U-like protein 2 OS=Homo sapiens OX=9606 HNRNPUL2 GN=HNRNPUL2 PE=1 SV=1                            | HNRNPUL2  | 17 | 16 | 21.150% | 85103.67  | 4.85 |
| Q92841 | sp Q92841 DDX17_HUMAN Probable ATP-dependent RNA helicase DDX17 OS=Homo sapiens OX=9606 GN=DDX17 DDX17 PE=1 SV=2                                                 | DDX17     | 17 | 16 | 23.730% | 80271.54  | 8.53 |
| O60264 | sp O60264 SMCA5_HUMAN SWI/SNF-related matrix-associated actin-dependent regulator of chromatin subfamily A member 5 OS=Homo sapiens OX=9606 GN=SMARCA5 PE=1 SV=1 | SMARCA5   | 16 | 16 | 15.300% | 121903.95 | 8.27 |
| E9PGM1 | tr E9PGM1 E9PGM1_HUMAN Eukaryotic translation initiation factor 4 gamma 1 OS=Homo sapiens OX=9606 GN=EIF4G1 EIF4G1 PE=1 SV=1                                     | EIF4G1    | 16 | 16 | 11.900% | 166745.25 | 5.15 |
| Q8IWP6 | tr Q8IWP6 Q8IWP6_HUMAN Tubulin beta chain OS=Homo sapiens OX=9606 PE=2 SV=1                                                                                      | TUBB      | 25 | 15 | 36.400% | 49752.41  | 4.82 |
| P09651 | sp P09651 ROA1_HUMAN Heterogeneous nuclear ribonucleoprotein A1 OS=Homo sapiens OX=9606 HNRNPA1 GN=HNRNPA1 PE=1 SV=5                                             | HNRNPA1   | 22 | 15 | 38.980% | 38746.19  | 9.17 |
| P14618 | sp P14618 KPYM_HUMAN Pyruvate kinase PKM OS=Homo sapiens OX=9606 GN=PKM PE=1 SV=4                                                                                | PKM       | 19 | 15 | 36.350% | 57936.25  | 7.96 |
| B4E356 | tr B4E356 B4E356_HUMAN ATP-dependent DNA helicase 2 subunit 1 OS=Homo sapiens OX=9606 PE=2 SV=1                                                                  | DNAAF1    | 17 | 15 | 29.620% | 54451.46  | 8.95 |
| O75376 | sp O75376 NCOR1_HUMAN Nuclear receptor corepressor 1 OS=Homo sapiens OX=9606 GN=NCOR1 PE=1 SV=2                                                                  | NCOR1     | 16 | 15 | 6.430%  | 270206.63 | 6.66 |
| F5H2F4 | tr F5H2F4 F5H2F4_HUMAN C-1-tetrahydrofolate synthase, cytoplasmic OS=Homo sapiens OX=9606 GN=MTHFD1 PE=1 SV=2                                                    | MTHFD1    | 16 | 15 | 17.530% | 104708.74 | 7.35 |

|            |                                                                                                                                                                                    |        |    |    |         |           |      |
|------------|------------------------------------------------------------------------------------------------------------------------------------------------------------------------------------|--------|----|----|---------|-----------|------|
| Q01804     | sp Q01804 OTUD4_HUMAN OTU domain-containing protein 4<br>OS=Homo sapiens OX=9606 GN=OTUD4 PE=1 SV=4                                                                                | OTUD4  | 15 | 15 | 14.720% | 124043.03 | 6.25 |
| A8K8U1     | tr A8K8U1 A8K8U1_HUMAN cDNA FLJ77762, highly similar to<br>Homo sapiens cullin-associated and neddylation-dissociated 1<br>(CAND1), mRNA OS=Homo sapiens OX=9606 PE=2 SV=1         |        | 15 | 15 | 14.390% | 136316.18 | 5.55 |
| A0A384MEE3 | tr A0A384MEE3 A0A384MEE3_HUMAN Tubulin beta chain<br>OS=Homo sapiens OX=9606 PE=2 SV=1                                                                                             |        | 23 | 14 | 35.060% | 49952.54  | 4.78 |
| A0A024RDE5 | tr A0A024RDE5 A0A024RDE5_HUMAN Ras-GTPase<br>activating protein SH3 domain-binding protein 2, isoform CRA_a G3BP2<br>OS=Homo sapiens OX=9606 GN=G3BP2 PE=4 SV=1                    |        | 19 | 14 | 28.420% | 54120.49  | 5.41 |
| B7Z597     | tr B7Z597 B7Z597_HUMAN 60 kDa chaperonin OS=Homo<br>sapiens OX=9606 PE=2 SV=1                                                                                                      |        | 16 | 14 | 26.950% | 60046.79  | 5.59 |
| B9EG90     | tr B9EG90 B9EG90_HUMAN DNA topoisomerase I OS=Homo<br>sapiens OX=9606 GN=TOP1 PE=2 SV=1                                                                                            | TOP1   | 16 | 14 | 17.390% | 90698.62  | 9.34 |
| P04843     | sp P04843 RPN1_HUMAN Dolichyl-diphosphooligosaccharide--<br>protein glycosyltransferase subunit 1 OS=Homo sapiens RPN1<br>OX=9606 GN=RPN1 PE=1 SV=1                                |        | 15 | 14 | 22.240% | 68568.55  | 5.96 |
| P11388     | sp P11388 TOP2A_HUMAN DNA topoisomerase 2-alpha<br>OS=Homo sapiens OX=9606 GN=TOP2A PE=1 SV=3                                                                                      | TOP2A  | 15 | 14 | 10.120% | 174383.05 | 8.82 |
| D2CFK9     | tr D2CFK9 D2CFK9_HUMAN Nucleolar GTP-binding protein 1<br>OS=Homo sapiens OX=9606 GN=GTPBP4 PE=3 SV=1                                                                              | GTPBP4 | 15 | 14 | 21.920% | 73963.66  | 9.52 |
| O60841     | sp O60841 EIF5B_HUMAN Eukaryotic translation initiation factor<br>5B OS=Homo sapiens OX=9606 GN=EIF5B PE=1 SV=4                                                                    | EIF5B  | 14 | 14 | 15.160% | 138825.19 | 5.39 |
| Q14690     | sp Q14690 RRP5_HUMAN Protein RRP5 homolog OS=Homo<br>sapiens OX=9606 GN=PDCD11 PE=1 SV=3                                                                                           | PDCD11 | 14 | 14 | 8.390%  | 208698.27 | 8.99 |
| A0A7I2V659 | tr A0A7I2V659 A0A7I2V659_HUMAN Elongation factor 1-alpha<br>OS=Homo sapiens OX=9606 GN=EEF1A1 PE=1 SV=1                                                                            | EEF1A1 | 18 | 13 | 32.900% | 49823.86  | 9.05 |
| A8K6V7     | tr A8K6V7 A8K6V7_HUMAN cDNA FLJ76053, highly similar to<br>Homo sapiens Ras-GTPase activating protein SH3 domain-<br>binding protein 2 (G3BP2), transcript variant 3, mRNA OS=Homo |        | 18 | 13 | 31.180% | 50815.83  | 5.27 |

sapiens OX=9606 PE=2 SV=1

|            |                                                                                                                                      |            |    |    |         |           |      |
|------------|--------------------------------------------------------------------------------------------------------------------------------------|------------|----|----|---------|-----------|------|
| P26599     | sp P26599 PTBP1_HUMAN Polypyrimidine tract-binding protein 1 OS=Homo sapiens OX=9606 GN=PTBP1 PE=1 SV=1                              | PTBP1      | 17 | 13 | 29.000% | 57220.64  | 9.22 |
| Q9NYF8     | sp Q9NYF8 BCLF1_HUMAN Bcl-2-associated transcription factor 1 OS=Homo sapiens OX=9606 GN=BCLAF1 PE=1 SV=2                            | BCLAF1     | 16 | 13 | 13.480% | 106120.82 | 9.99 |
| Q05CW7     | tr Q05CW7 Q05CW7_HUMAN NAT10 protein (Fragment) OS=Homo sapiens OX=9606 GN=NAT10 PE=2 SV=1                                           | NAT10      | 16 | 13 | 29.060% | 62383.72  | 9.35 |
| O00567     | sp O00567 NOP56_HUMAN Nucleolar protein 56 OS=Homo sapiens OX=9606 GN=NOP56 PE=1 SV=4                                                | NOP56      | 15 | 13 | 22.050% | 66049.12  | 9.24 |
| B4DUQ1     | tr B4DUQ1 B4DUQ1_HUMAN Heterogeneous nuclear ribonucleoprotein K OS=Homo sapiens OX=9606 PE=2 SV=1                                   |            | 15 | 13 | 36.220% | 48509.93  | 5.69 |
| P22314     | sp P22314 UBA1_HUMAN Ubiquitin-like modifier-activating enzyme 1 OS=Homo sapiens OX=9606 GN=UBA1 PE=1 SV=3                           | UBA1       | 14 | 13 | 13.520% | 117847.64 | 5.49 |
| A0A024R4F1 | tr A0A024R4F1 A0A024R4F1_HUMAN 2-phospho-D-glycerate hydro-lyase OS=Homo sapiens OX=9606 GN=HEL-S-17 PE=2 SV=1                       | HEL-S-17   | 14 | 13 | 33.410% | 47168.41  | 7.01 |
| A0A1U9X7W7 | tr A0A1U9X7W7 A0A1U9X7W7_HUMAN Epididymis secretory sperm binding protein OS=Homo sapiens OX=9606 PE=2 SV=1                          |            | 19 | 12 | 18.560% | 70374.21  | 5.76 |
| A8MXP9     | tr A8MXP9 A8MXP9_HUMAN Matrin-3 OS=Homo sapiens OX=9606 GN=MATR3 PE=1 SV=1                                                           | MATR3      | 16 | 12 | 19.110% | 99966.01  | 5.71 |
| V9HW26     | tr V9HW26 V9HW26_HUMAN ATP synthase subunit alpha OS=Homo sapiens OX=9606 GN=HEL-S-123m PE=1 SV=1                                    | HEL-S-123m | 16 | 12 | 27.310% | 59749.91  | 9.16 |
| O43143     | sp O43143 DHX15_HUMAN Pre-mRNA-splicing factor ATP-dependent RNA helicase DHX15 OS=Homo sapiens OX=9606 GN=DHX15 PE=1 SV=2           | DHX15      | 14 | 12 | 15.720% | 90931.82  | 7.12 |
| D3DTW3     | tr D3DTW3 D3DTW3_HUMAN Insulin-like growth factor 2 mRNA binding protein 1 deltaN CRDBP OS=Homo sapiens OX=9606 GN=IGF2BP1 PE=2 SV=1 | IGF2BP1    | 14 | 12 | 29.480% | 47912.39  | 9.52 |

|            |                                                                                                                                                        |            |    |    |         |           |       |
|------------|--------------------------------------------------------------------------------------------------------------------------------------------------------|------------|----|----|---------|-----------|-------|
| Q53YD7     | tr Q53YD7 Q53YD7_HUMAN Elongation factor 1-gamma<br>OS=Homo sapiens OX=9606 GN=EEF1G PE=2 SV=1                                                         | EEF1G      | 14 | 12 | 26.770% | 50118.19  | 6.25  |
| X5DR09     | tr X5DR09 X5DR09_HUMAN General transcription factor Ii<br>isoform A (Fragment) OS=Homo sapiens OX=9606 GN=GTF2I GTF2I<br>PE=2 SV=1                     |            | 14 | 12 | 11.820% | 112415.01 | 6.09  |
| O14654     | sp O14654 IRS4_HUMAN Insulin receptor substrate 4<br>OS=Homo sapiens OX=9606 GN=IRS4 PE=1 SV=1                                                         | IRS4       | 13 | 12 | 9.390%  | 133766.06 | 8.72  |
| P34932     | sp P34932 HSP74_HUMAN Heat shock 70 kDa protein 4<br>OS=Homo sapiens OX=9606 GN=HSPA4 PE=1 SV=4                                                        | HSPA4      | 13 | 12 | 17.140% | 94329.87  | 5.11  |
| M0QYS1     | tr M0QYS1 M0QYS1_HUMAN 60S ribosomal protein L13a<br>(Fragment) OS=Homo sapiens OX=9606 GN=RPL13A PE=1 RPL13A<br>SV=2                                  |            | 13 | 12 | 37.140% | 24104.41  | 10.85 |
| P17987     | sp P17987 TCPA_HUMAN T-complex protein 1 subunit alpha<br>OS=Homo sapiens OX=9606 GN=TCP1 PE=1 SV=1                                                    | TCP1       | 12 | 12 | 23.560% | 60342.9   | 5.8   |
| A0A024R4Z6 | tr A0A024R4Z6 A0A024R4Z6_HUMAN FACT complex subunit<br>SSRP1 OS=Homo sapiens OX=9606 GN=SSRP1 PE=3 SV=1                                                | SSRP1      | 12 | 12 | 16.930% | 81073.88  | 6.45  |
| A8K329     | tr A8K329 A8K329_HUMAN cDNA FLJ76656, highly similar to<br>Homo sapiens scaffold attachment factor B (SAFB), mRNA<br>OS=Homo sapiens OX=9606 PE=2 SV=1 |            | 12 | 12 | 14.520% | 102752.57 | 5.3   |
| V9HW84     | tr V9HW84 V9HW84_HUMAN 75 kDa glucose-regulated protein<br>OS=Homo sapiens OX=9606 GN=HEL-S-124m PE=2 SV=1                                             | HEL-S-124m | 12 | 12 | 20.320% | 73778.79  | 5.97  |
| B3KSM6     | tr B3KSM6 B3KSM6_HUMAN cDNA FLJ36606 fis, clone<br>TRACH2015654, highly similar to HEAT SHOCK 70 kDa<br>PROTEIN 6 OS=Homo sapiens OX=9606 PE=2 SV=1    |            | 17 | 11 | 15.710% | 70971.2   | 5.81  |
| E9PCY7     | tr E9PCY7 E9PCY7_HUMAN Heterogeneous nuclear<br>ribonucleoprotein H OS=Homo sapiens OX=9606 HNRNPH1<br>GN=HNRNPH1 PE=1 SV=1                            |            | 15 | 11 | 30.770% | 47086.62  | 5.93  |
| P62258     | sp P62258 1433E_HUMAN 14-3-3 protein epsilon OS=Homo<br>sapiens OX=9606 GN=YWHAE PE=1 SV=1                                                             | YWHAE      | 14 | 11 | 35.290% | 29173.58  | 4.63  |
| P68133     | sp P68133 ACTS_HUMAN Actin, alpha skeletal muscle<br>OS=Homo sapiens OX=9606 GN=ACTA1 PE=1 SV=1                                                        | ACTA1      | 14 | 11 | 25.990% | 42050.59  | 5.23  |



|            |                                                                                                                        |        |    |    |         |           |       |
|------------|------------------------------------------------------------------------------------------------------------------------|--------|----|----|---------|-----------|-------|
| Q9BZZ5     | sp Q9BZZ5 API5_HUMAN Apoptosis inhibitor 5 OS=Homo sapiens OX=9606 GN=API5 PE=1 SV=3                                   | API5   | 14 | 11 | 22.140% | 59003.87  | 6.99  |
| A8K088     | tr A8K088 A8K088_HUMAN RNA helicase OS=Homo sapiens OX=9606 PE=2 SV=1                                                  |        | 13 | 11 | 26.850% | 46125.37  | 5.32  |
| Q5U077     | tr Q5U077 Q5U077_HUMAN L-lactate dehydrogenase OS=Homo sapiens OX=9606 GN=LDHB PE=2 SV=1                               | LDHB   | 13 | 11 | 31.140% | 36638.07  | 5.71  |
| P00338     | sp P00338 LDHA_HUMAN L-lactate dehydrogenase A chain OS=Homo sapiens OX=9606 GN=LDHA PE=1 SV=2                         | LDHA   | 12 | 11 | 34.640% | 36688.3   | 8.44  |
| P10412     | sp P10412 H14_HUMAN Histone H1.4 OS=Homo sapiens OX=9606 GN=H1-4 PE=1 SV=2                                             | H1-4   | 12 | 11 | 34.250% | 21864.98  | 11.03 |
| P16403     | sp P16403 H12_HUMAN Histone H1.2 OS=Homo sapiens OX=9606 GN=H1-2 PE=1 SV=2                                             | H1-2   | 12 | 11 | 37.090% | 21364.47  | 10.94 |
| P63104     | sp P63104 1433Z_HUMAN 14-3-3 protein zeta/delta OS=Homo sapiens OX=9606 GN=YWHAZ PE=1 SV=1                             | YWHAZ  | 12 | 11 | 46.940% | 27744.79  | 4.73  |
| Q92598     | sp Q92598 HS105_HUMAN Heat shock protein 105 kDa OS=Homo sapiens OX=9606 GN=HSPH1 PE=1 SV=1                            | HSPH1  | 12 | 11 | 15.270% | 96863.87  | 5.28  |
| H3BUF6     | tr H3BUF6 H3BUF6_HUMAN Ataxin-2-like protein OS=Homo sapiens OX=9606 GN=ATXN2L PE=1 SV=1                               | ATXN2L | 12 | 11 | 9.270%  | 112712.57 | 8.79  |
| P41252     | sp P41252 SYIC_HUMAN Isoleucine--tRNA ligase, cytoplasmic OS=Homo sapiens OX=9606 GN=IARS1 PE=1 SV=2                   | IARS1  | 11 | 11 | 8.240%  | 144496.4  | 5.82  |
| A0A6Q8PFY2 | tr A0A6Q8PFY2 A0A6Q8PFY2_HUMAN Alanine--tRNA ligase OS=Homo sapiens OX=9606 GN=AARS1 PE=1 SV=1                         | AARS1  | 11 | 11 | 12.380% | 107929.55 | 5.34  |
| I6TRR8     | tr I6TRR8 I6TRR8_HUMAN SND1-BRAF fusion OS=Homo sapiens OX=9606 PE=2 SV=1                                              |        | 11 | 11 | 10.010% | 109145.65 | 9.36  |
| Q4ZG57     | tr Q4ZG57 Q4ZG57_HUMAN DNA replication licensing factor MCM6 (Fragment) OS=Homo sapiens OX=9606 GN=MCM6 MCM6 PE=3 SV=1 |        | 11 | 11 | 14.780% | 88944.82  | 5.44  |

|            |                                                                                                                       |    |    |         |           |       |
|------------|-----------------------------------------------------------------------------------------------------------------------|----|----|---------|-----------|-------|
| Q53HV2     | tr Q53HV2 Q53HV2_HUMAN T-complex protein 1 subunit eta (Fragment) OS=Homo sapiens OX=9606 PE=2 SV=1                   | 11 | 11 | 20.440% | 59339.88  | 7.55  |
| Q6IQ30     | tr Q6IQ30 Q6IQ30_HUMAN Polyadenylate-binding protein PABPC4 OS=Homo sapiens OX=9606 GN=PABPC4 PE=2 SV=1               | 11 | 11 | 19.390% | 72359.8   | 9.38  |
| Q96BS4     | tr Q96BS4 Q96BS4_HUMAN FBL protein (Fragment) FBL OS=Homo sapiens OX=9606 GN=FBL PE=2 SV=2                            | 12 | 10 | 44.620% | 28449.14  | 9.45  |
| V9HW80     | tr V9HW80 V9HW80_HUMAN 15S Mg(2+)-ATPase p97 subunit HEL-S-70 OS=Homo sapiens OX=9606 GN=HEL-S-70 PE=1 SV=1           | 12 | 10 | 16.500% | 89320.79  | 5.14  |
| P16402     | sp P16402 H13_HUMAN Histone H1.3 OS=Homo sapiens OX=9606 GN=H1-3 PE=1 SV=2                                            | 11 | 10 | 31.670% | 22349.61  | 11.02 |
| A0A024RCM3 | tr A0A024RCM3 A0A024RCM3_HUMAN RNA helicase hCG_20056 OS=Homo sapiens OX=9606 GN=hCG_2005638 PE=4 SV=1                | 11 | 10 | 21.260% | 48990.79  | 5.44  |
| Q6FI03     | tr Q6FI03 Q6FI03_HUMAN G3BP protein OS=Homo sapiens OX=9606 GN=G3BP PE=2 SV=1                                         | 11 | 10 | 24.250% | 52163.66  | 5.42  |
| P13797     | sp P13797 PLST_HUMAN Plastin-3 OS=Homo sapiens OX=9606 GN=PLS3 PE=1 SV=4                                              | 10 | 10 | 19.840% | 70810.21  | 5.41  |
| P46013     | sp P46013 KI67_HUMAN Proliferation marker protein Ki-67 MKI67 OS=Homo sapiens OX=9606 GN=MKI67 PE=1 SV=2              | 10 | 10 | 3.560%  | 358689.46 | 9.49  |
| Q04917     | sp Q04917 1433F_HUMAN 14-3-3 protein eta OS=Homo sapiens OX=9606 GN=YWHAH PE=1 SV=4                                   | 10 | 10 | 36.590% | 28218.4   | 4.76  |
| Q12788     | sp Q12788 TBL3_HUMAN Transducin beta-like protein 3 TBL3 OS=Homo sapiens OX=9606 GN=TBL3 PE=1 SV=2                    | 10 | 10 | 14.600% | 89033.66  | 6.44  |
| Q13263     | sp Q13263 TIF1B_HUMAN Transcription intermediary factor 1-beta OS=Homo sapiens OX=9606 GN=TRIM28 PE=1 SV=5            | 10 | 10 | 12.340% | 88548.76  | 5.52  |
| Q15029     | sp Q15029 U5S1_HUMAN 116 kDa U5 small nuclear ribonucleoprotein component OS=Homo sapiens OX=9606 GN=EFTUD2 PE=1 SV=1 | 10 | 10 | 10.910% | 109434.5  | 4.84  |

|            |                                                                                                                                                                                               |    |    |         |           |       |
|------------|-----------------------------------------------------------------------------------------------------------------------------------------------------------------------------------------------|----|----|---------|-----------|-------|
| A0A0S2Z3G9 | tr A0A0S2Z3G9 A0A0S2Z3G9_HUMAN Actinin alpha 4 isoform 1 (Fragment) OS=Homo sapiens OX=9606 GN=ACTN4 PE=2 ACTN4 SV=1                                                                          | 10 | 10 | 13.940% | 104852.81 | 5.27  |
| A0A384N6C7 | tr A0A384N6C7 A0A384N6C7_HUMAN Epididymis secretory sperm binding protein OS=Homo sapiens OX=9606 PE=2 SV=1                                                                                   | 10 | 10 | 15.620% | 64085.97  | 8.49  |
| A0A3B3IRQ9 | tr A0A3B3IRQ9 A0A3B3IRQ9_HUMAN Double-stranded RNA-specific adenosine deaminase (Fragment) OS=Homo sapiens ADAR OX=9606 GN=ADAR PE=1 SV=1                                                     | 10 | 10 | 10.100% | 128269.05 | 8.84  |
| A8K3W4     | tr A8K3W4 A8K3W4_HUMAN cDNA FLJ75163, highly similar to Homo sapiens heterogeneous nuclear ribonucleoprotein U-like 1 (HNRPUL1), transcript variant 4, mRNA OS=Homo sapiens OX=9606 PE=2 SV=1 | 10 | 10 | 16.010% | 84820.78  | 8.99  |
| B3KMR5     | tr B3KMR5 B3KMR5_HUMAN cDNA FLJ12434 fis, clone NT2RM1000037, highly similar to Homo sapiens KIAA0690 protein OS=Homo sapiens OX=9606 PE=2 SV=1                                               | 10 | 10 | 8.940%  | 143670.44 | 8.97  |
| B9A067     | tr B9A067 B9A067_HUMAN MICOS complex subunit MIC60 IMMT OS=Homo sapiens OX=9606 GN=IMMT PE=1 SV=2                                                                                             | 10 | 10 | 15.050% | 78972.79  | 6.62  |
| H0YEN5     | tr H0YEN5 H0YEN5_HUMAN 40S ribosomal protein S2 (Fragment) OS=Homo sapiens OX=9606 GN=RPS2 PE=1 RPS2 SV=1                                                                                     | 10 | 10 | 53.850% | 21153.69  | 9.86  |
| B0QYK0     | tr B0QYK0 B0QYK0_HUMAN RNA-binding protein EWS EWSR1 OS=Homo sapiens OX=9606 GN=EWSR1 PE=1 SV=1                                                                                               | 16 | 9  | 16.990% | 64928.66  | 9.42  |
| B2R4R0     | tr B2R4R0 B2R4R0_HUMAN Histone H4 OS=Homo sapiens HIST1H4J OX=9606 GN=HIST1H4J PE=2 SV=1                                                                                                      | 14 | 9  | 62.140% | 11367.2   | 11.36 |
| P62987     | sp P62987 RL40_HUMAN Ubiquitin-60S ribosomal protein L40 UBA52 OS=Homo sapiens OX=9606 GN=UBA52 PE=1 SV=2                                                                                     | 13 | 9  | 54.690% | 14728.16  | 9.87  |
| P11021     | sp P11021 BIP_HUMAN Endoplasmic reticulum chaperone BiP HSPA5 OS=Homo sapiens OX=9606 GN=HSPA5 PE=1 SV=2                                                                                      | 12 | 9  | 13.910% | 72332.07  | 5.07  |
| O60907     | sp O60907 TBL1X_HUMAN F-box-like/WD repeat-containing protein TBL1X OS=Homo sapiens OX=9606 GN=TBL1X PE=1 TBL1X SV=3                                                                          | 11 | 9  | 22.880% | 62494.98  | 6.08  |

|            |                                                                                                                           |                                       |    |   |         |           |      |
|------------|---------------------------------------------------------------------------------------------------------------------------|---------------------------------------|----|---|---------|-----------|------|
| P05141     | sp P05141 ADT2_HUMAN ADP/ATP translocase 2 OS=Homo sapiens OX=9606 GN=SLC25A5 PE=1 SV=7                                   | SLC25A5                               | 11 | 9 | 29.870% | 32851.84  | 9.71 |
| O00148     | sp O00148 DX39A_HUMAN ATP-dependent RNA helicase DDX39A OS=Homo sapiens OX=9606 GN=DDX39A PE=1 SV=2                       | DDX39A                                | 10 | 9 | 19.910% | 49128.98  | 5.46 |
| P40227     | sp P40227 TCPZ_HUMAN T-complex protein 1 subunit zeta OS=Homo sapiens OX=9606 GN=CCT6A PE=1 SV=3                          | CCT6A                                 | 10 | 9 | 18.640% | 58023.51  | 6.24 |
| Q9NVI7     | sp Q9NVI7 ATD3A_HUMAN ATPase family AAA domain-containing protein 3A OS=Homo sapiens OX=9606 GN=ATAD3A PE=1 SV=2          | ATAD3A                                | 10 | 9 | 15.140% | 71368.33  | 9.08 |
| A1A5C4     | tr A1A5C4 A1A5C4_HUMAN RRBP1 protein OS=Homo sapiens OX=9606 GN=RRBP1 PE=2 SV=1                                           | RRBP1                                 | 10 | 9 | 10.600% | 102823.45 | 5.32 |
| E9PFK5     | tr E9PFK5 E9PFK5_HUMAN Nucleolar protein 14 OS=Homo sapiens OX=9606 GN=NOP14 PE=1 SV=1                                    | NOP14                                 | 10 | 9 | 9.770%  | 88865     | 5.85 |
| Q6NXR8     | tr Q6NXR8 Q6NXR8_HUMAN 40S ribosomal protein S3a OS=Homo sapiens OX=9606 GN=RPS3A PE=1 SV=1                               | RPS3A                                 | 10 | 9 | 33.330% | 29974.62  | 9.75 |
| P27694     | sp P27694 RFA1_HUMAN Replication protein A 70 kDa DNA-binding subunit OS=Homo sapiens OX=9606 GN=RPA1 PE=1 SV=2           | RPA1                                  | 9  | 9 | 13.960% | 68137.42  | 6.92 |
| Q06787     | sp Q06787 FMR1_HUMAN Synaptic functional regulator FMR1 OS=Homo sapiens OX=9606 GN=FMR1 PE=1 SV=1                         | FMR1                                  | 9  | 9 | 15.350% | 71173.63  | 7    |
| Q14692     | sp Q14692 BMS1_HUMAN Ribosome biogenesis protein BMS1 homolog OS=Homo sapiens OX=9606 GN=BMS1 PE=1 SV=1                   | BMS1                                  | 9  | 9 | 7.330%  | 145805.51 | 6.04 |
| A0A0S2Z4T1 | tr A0A0S2Z4T1 A0A0S2Z4T1_HUMAN DNA replication licensing factor MCM3 (Fragment) OS=Homo sapiens OX=9606 GN=MCM3 PE=2 SV=1 | MCM3                                  | 9  | 9 | 11.880% | 90979.76  | 5.53 |
| A0A384NKW7 | tr A0A384NKW7 A0A384NKW7_HUMAN Chromosome segregation 1-like protein OS=Homo sapiens OX=9606 PE=2 SV=1                    | Chromosome segregation 1-like protein | 9  | 9 | 9.990%  | 110415.28 | 5.51 |
| A0A6Q8PGG9 | tr A0A6Q8PGG9 A0A6Q8PGG9_HUMAN E3 ubiquitin-protein ligase TRIP12 OS=Homo sapiens OX=9606 GN=TRIP12 PE=1 SV=1             | TRIP12                                | 9  | 9 | 6.000%  | 228581.02 | 8.85 |

|            |                                                                                                                                                            |    |   |         |           |       |
|------------|------------------------------------------------------------------------------------------------------------------------------------------------------------|----|---|---------|-----------|-------|
| A8K6V3     | tr A8K6V3 A8K6V3_HUMAN cDNA FLJ78677, highly similar to Homo sapiens splicing factor 3b, subunit 3, 130kDa (SF3B3), mRNA OS=Homo sapiens OX=9606 PE=2 SV=1 | 9  | 9 | 7.230%  | 135576.72 | 5.09  |
| B3KNB4     | tr B3KNB4 B3KNB4_HUMAN cDNA FLJ14168 fis, clone NT2RP2001440, highly similar to 14-3-3 protein gamma OS=Homo sapiens OX=9606 PE=2 SV=1                     | 9  | 9 | 31.170% | 28242.24  | 4.8   |
| B3KXX5     | tr B3KXX5 B3KXX5_HUMAN Structural maintenance of chromosomes protein OS=Homo sapiens OX=9606 PE=2 SV=1                                                     | 9  | 9 | 6.810%  | 144454.3  | 6.62  |
| B7ZAR1     | tr B7ZAR1 B7ZAR1_HUMAN CCT-epsilon OS=Homo sapiens OX=9606 GN=CCT5 PE=1 SV=1 CCT5                                                                          | 9  | 9 | 18.090% | 55348.35  | 5.33  |
| H3BLX5     | tr H3BLX5 H3BLX5_HUMAN Ubiquitin carboxyl-terminal hydrolase 48 (Fragment) OS=Homo sapiens OX=9606 USP48 GN=USP48 PE=1 SV=1                                | 16 | 8 | 77.390% | 13251.99  | 6.57  |
| A0A2U3TZH3 | tr A0A2U3TZH3 A0A2U3TZH3_HUMAN Elongation factor 1-alpha OS=Homo sapiens OX=9606 GN=EEF1A2 PE=1 SV=1 EEF1A2                                                | 11 | 8 | 16.940% | 54339.92  | 9.13  |
| B3KN82     | tr B3KN82 B3KN82_HUMAN cDNA FLJ13913 fis, clone Y79AA1000231, highly similar to Nucleolar protein NOP5 OS=Homo sapiens OX=9606 PE=2 SV=1                   | 11 | 8 | 21.890% | 52288.04  | 9.12  |
| Q5JR94     | tr Q5JR94 Q5JR94_HUMAN 40S ribosomal protein S8 OS=Homo sapiens OX=9606 GN=RPS8 PE=2 SV=1 RPS8                                                             | 10 | 8 | 37.980% | 24204.9   | 10.32 |
| Q8NCA5     | sp Q8NCA5 FA98A_HUMAN Protein FAM98A OS=Homo sapiens OX=9606 GN=FAM98A PE=1 SV=2 FAM98A                                                                    | 9  | 8 | 14.860% | 55271.88  | 9.1   |
| Q59EG8     | tr Q59EG8 Q59EG8_HUMAN 26S proteasome non-ATPase regulatory subunit 2 (Fragment) OS=Homo sapiens OX=9606 PE=2 SV=1                                         | 9  | 8 | 10.730% | 100587.03 | 5.04  |
| Q5SWX3     | tr Q5SWX3 Q5SWX3_HUMAN Calcium/calmodulin-dependent protein kinase OS=Homo sapiens OX=9606 GN=CAMK2G CAMK2G PE=1 SV=1                                      | 9  | 8 | 16.090% | 57796.03  | 6.87  |
| V9HWD6     | tr V9HWD6 V9HWD6_HUMAN Epididymis secretory protein Li 1 OS=Homo sapiens OX=9606 GN=HEL-S-1 PE=2 SV=1 HEL-S-1                                              | 9  | 8 | 33.330% | 28082.08  | 4.76  |
| O00541     | sp O00541 PESC_HUMAN Pescadillo homolog OS=Homo sapiens OX=9606 GN=PES1 PE=1 SV=1 PES1                                                                     | 8  | 8 | 13.950% | 68001.82  | 6.93  |

|            |                                                                                                                                                    |       |   |   |         |           |      |
|------------|----------------------------------------------------------------------------------------------------------------------------------------------------|-------|---|---|---------|-----------|------|
| P00558     | sp P00558 PGK1_HUMAN Phosphoglycerate kinase 1<br>OS=Homo sapiens OX=9606 GN=PGK1 PE=1 SV=3                                                        | PGK1  | 8 | 8 | 25.900% | 44614.2   | 8.3  |
| P05023     | sp P05023 AT1A1_HUMAN Sodium/potassium-transporting<br>ATPase subunit alpha-1 OS=Homo sapiens OX=9606 ATP1A1<br>GN=ATP1A1 PE=1 SV=1                |       | 8 | 8 | 6.550%  | 112894.82 | 5.33 |
| P19525     | sp P19525 E2AK2_HUMAN Interferon-induced, double-<br>stranded RNA-activated protein kinase OS=Homo sapiens EIF2AK2<br>OX=9606 GN=EIF2AK2 PE=1 SV=2 |       | 8 | 8 | 13.430% | 62093.53  | 8.58 |
| P26038     | sp P26038 MOES_HUMAN Moesin OS=Homo sapiens<br>OX=9606 GN=MSN PE=1 SV=3                                                                            | MSN   | 8 | 8 | 10.570% | 67819.26  | 6.08 |
| Q5T5X7     | sp Q5T5X7 BEND3_HUMAN BEN domain-containing protein 3<br>OS=Homo sapiens OX=9606 GN=BEND3 PE=1 SV=1                                                | BEND3 | 8 | 8 | 13.040% | 94473.51  | 5.29 |
| Q9Y2L1     | sp Q9Y2L1 RRP44_HUMAN Exosome complex exonuclease<br>RRP44 OS=Homo sapiens OX=9606 GN=DIS3 PE=1 SV=2                                               | DIS3  | 8 | 8 | 9.810%  | 109001.5  | 6.69 |
| A0A024R158 | tr A0A024R158 A0A024R158_HUMAN Structural maintenance<br>of chromosomes protein OS=Homo sapiens OX=9606 SMC2L1<br>GN=SMC2L1 PE=3 SV=1              |       | 8 | 8 | 7.940%  | 135654.48 | 8.54 |
| A0A024R592 | tr A0A024R592 A0A024R592_HUMAN Glucosidase, alpha<br>neutral AB, isoform CRA_b OS=Homo sapiens OX=9606 GANAB<br>GN=GANAB PE=3 SV=1                 |       | 8 | 8 | 11.100% | 96188.28  | 5.5  |
| A0A0S2Z471 | tr A0A0S2Z471 A0A0S2Z471_HUMAN Creatine kinase<br>(Fragment) OS=Homo sapiens OX=9606 GN=CKB PE=2 SV=1                                              | CKB   | 8 | 8 | 24.200% | 44921.28  | 5.72 |
| A0A1U9X609 | tr A0A1U9X609 A0A1U9X609_HUMAN ABCF1 OS=Homo<br>sapiens OX=9606 PE=4 SV=1                                                                          |       | 8 | 8 | 10.060% | 95924.6   | 6.4  |
| A0A223PQH6 | tr A0A223PQH6 A0A223PQH6_HUMAN HCFC1 OS=Homo<br>sapiens OX=9606 PE=4 SV=1                                                                          |       | 8 | 8 | 4.130%  | 208756.22 | 7.32 |
| A0A2R8Y212 | tr A0A2R8Y212 A0A2R8Y212_HUMAN DNA<br>helicase OS=Homo sapiens OX=9606 GN=CHD4 PE=1 SV=1                                                           | CHD4  | 8 | 8 | 3.970%  | 218187.33 | 5.64 |
| B4DED6     | tr B4DED6 B4DED6_HUMAN RNA helicase OS=Homo sapiens<br>OX=9606 PE=2 SV=1                                                                           |       | 8 | 8 | 15.090% | 72157.15  | 8.73 |

|            |                                                                                                                                |         |   |   |         |           |       |
|------------|--------------------------------------------------------------------------------------------------------------------------------|---------|---|---|---------|-----------|-------|
| C9JIJ5     | tr C9JIJ5 C9JIJ5_HUMAN 60S ribosomal protein L7 (Fragment)<br>OS=Homo sapiens OX=9606 GN=RPL7 PE=1 SV=1                        | RPL7    | 8 | 8 | 45.450% | 11892.22  | 11.38 |
| D3DP78     | tr D3DP78 D3DP78_HUMAN Aspartate--tRNA<br>cytoplasmic OS=Homo sapiens OX=9606 GN=DARS PE=3 DARS<br>SV=1                        | ligase, | 8 | 8 | 17.740% | 53463.55  | 6.1   |
| Q53FG5     | tr Q53FG5 Q53FG5_HUMAN DNA replication licensing factor<br>MCM5 (Fragment) OS=Homo sapiens OX=9606 PE=2 SV=1                   |         | 8 | 8 | 11.440% | 82235.59  | 8.56  |
| Q53HW2     | tr Q53HW2 Q53HW2_HUMAN 60S acidic ribosomal protein P0<br>(Fragment) OS=Homo sapiens OX=9606 PE=2 SV=1                         |         | 8 | 8 | 29.020% | 34301.12  | 5.72  |
| V9HWK0     | tr V9HWK0 V9HWK0_HUMAN Signal recognition particle<br>subunit SRP72 OS=Homo sapiens OX=9606 GN=HEL103 PE=2 HEL103<br>SV=1      |         | 8 | 8 | 15.650% | 74605.31  | 9.31  |
| F4ZW62     | tr F4ZW62 F4ZW62_HUMAN NF45 OS=Homo sapiens<br>OX=9606 PE=1 SV=1                                                               |         | 9 | 7 | 18.970% | 43061.62  | 5.19  |
| P33778     | sp P33778 H2B1B_HUMAN Histone H2B type 1-B OS=Homo<br>sapiens OX=9606 GN=H2BC3 PE=1 SV=2                                       | H2BC3   | 8 | 7 | 46.830% | 13950.02  | 10.31 |
| Q07020     | sp Q07020 RL18_HUMAN 60S ribosomal protein L18<br>OS=Homo sapiens OX=9606 GN=RPL18 PE=1 SV=2                                   | RPL18   | 8 | 7 | 34.570% | 21634.23  | 11.73 |
| A0A024RAC5 | tr A0A024RAC5 A0A024RAC5_HUMAN Epididymis secretory<br>sperm binding protein OS=Homo sapiens OX=9606 GN=RCC2 RCC2<br>PE=2 SV=1 |         | 8 | 7 | 15.520% | 56083.89  | 9.02  |
| A0A140VJE8 | tr A0A140VJE8 A0A140VJE8_HUMAN AP complex subunit<br>beta OS=Homo sapiens OX=9606 GN=AP2B1 PE=2 SV=1                           | AP2B1   | 8 | 7 | 6.730%  | 105690.58 | 5.19  |
| H0YEU2     | tr H0YEU2 H0YEU2_HUMAN 40S ribosomal protein S3<br>(Fragment) OS=Homo sapiens OX=9606 GN=RPS3 PE=1 RPS3<br>SV=1                |         | 8 | 7 | 42.690% | 18560.5   | 8.54  |
| J3KPS3     | tr J3KPS3 J3KPS3_HUMAN Fructose-bisphosphate aldolase<br>OS=Homo sapiens OX=9606 GN=ALDOA PE=1 SV=1                            | ALDOA   | 8 | 7 | 18.750% | 39817.02  | 8.3   |
| Q6PJV4     | tr Q6PJV4 Q6PJV4_HUMAN THRAP3 protein (Fragment)<br>OS=Homo sapiens OX=9606 GN=THRAP3 PE=2 SV=1                                | THRAP3  | 8 | 7 | 20.000% | 41857.06  | 11.51 |

|            |                                                                                                                                                |        |   |   |         |           |      |
|------------|------------------------------------------------------------------------------------------------------------------------------------------------|--------|---|---|---------|-----------|------|
| O75694     | sp O75694 NU155_HUMAN Nuclear pore complex protein Nup155 OS=Homo sapiens OX=9606 GN=NUP155 PE=1 SV=1                                          | NUP155 | 7 | 7 | 4.820%  | 155197.41 | 5.78 |
| Q02880     | sp Q02880 TOP2B_HUMAN DNA topoisomerase 2-beta OS=Homo sapiens OX=9606 GN=TOP2B PE=1 SV=3                                                      | TOP2B  | 7 | 7 | 4.000%  | 183264.98 | 8.14 |
| Q14008     | sp Q14008 CKAP5_HUMAN Cytoskeleton-associated protein 5 OS=Homo sapiens OX=9606 GN=CKAP5 PE=1 SV=3                                             | CKAP5  | 7 | 7 | 3.590%  | 225492    | 7.95 |
| Q5UIP0     | sp Q5UIP0 RIF1_HUMAN Telomere-associated protein RIF1 OS=Homo sapiens OX=9606 GN=RIF1 PE=1 SV=2                                                | RIF1   | 7 | 7 | 3.400%  | 274462.51 | 5.39 |
| Q9BVJ6     | sp Q9BVJ6 UT14A_HUMAN U3 small nucleolar RNA-associated protein 14 homolog A OS=Homo sapiens OX=9606 GN=UTP14A PE=1 SV=1                       | UTP14A | 7 | 7 | 11.800% | 87976.78  | 7.67 |
| Q9NSD9     | sp Q9NSD9 SYFB_HUMAN Phenylalanine--tRNA ligase beta subunit OS=Homo sapiens OX=9606 GN=FARSB PE=1 SV=3                                        | FARSB  | 7 | 7 | 12.390% | 66114.83  | 6.39 |
| Q9UIG0     | sp Q9UIG0 BAZ1B_HUMAN Tyrosine-protein kinase OS=Homo sapiens OX=9606 GN=BAZ1B PE=1 SV=2                                                       | BAZ1B  | 7 | 7 | 5.120%  | 170900.87 | 8.7  |
| A0A0A0MTB8 | tr A0A0A0MTB8 A0A0A0MTB8_HUMAN WD repeat-containing protein 36 OS=Homo sapiens OX=9606 GN=WDR36 PE=1 SV=1                                      | WDR36  | 7 | 7 | 7.600%  | 99365.03  | 6.96 |
| A0A7P0Z4B9 | tr A0A7P0Z4B9 A0A7P0Z4B9_HUMAN DNA damage-binding protein 1 OS=Homo sapiens OX=9606 GN=DDB1 PE=1 SV=1                                          | DDB1   | 7 | 7 | 6.230%  | 123277.26 | 5.1  |
| A4QPB0     | tr A4QPB0 A4QPB0_HUMAN IQ motif containing GTPase activating protein 1 OS=Homo sapiens OX=9606 GN=IQGAP1 PE=1 SV=1                             | IQGAP1 | 7 | 7 | 4.530%  | 189277.77 | 6.08 |
| B3GQE6     | tr B3GQE6 B3GQE6_HUMAN RNA helicase OS=Homo sapiens OX=9606 GN=DDX27 PE=2 SV=1                                                                 | DDX27  | 7 | 7 | 9.410%  | 86633.54  | 9.29 |
| B3KQH1     | tr B3KQH1 B3KQH1_HUMAN cDNA FLJ90452 fis, clone NT2RP3001475, highly similar to Splicing factor 3B subunit 3 OS=Homo sapiens OX=9606 PE=2 SV=1 | SF3B1  | 7 | 7 | 7.020%  | 99920.53  | 5.02 |
| B4DZC3     | tr B4DZC3 B4DZC3_HUMAN 5'-3' exoribonuclease OS=Homo sapiens OX=9606 PE=2 SV=1                                                                 | DIS3   | 7 | 7 | 9.040%  | 102415.18 | 7.55 |



|            |                                                                                                                                                     |         |   |   |         |           |       |
|------------|-----------------------------------------------------------------------------------------------------------------------------------------------------|---------|---|---|---------|-----------|-------|
| C6EMX8     | tr C6EMX8 C6EMX8_HUMAN DNA replication licensing factor MCM7 OS=Homo sapiens OX=9606 GN=MCM7 PE=2 SV=1                                              | MCM7    | 7 | 7 | 11.270% | 81278.95  | 5.98  |
| E7EQR4     | tr E7EQR4 E7EQR4_HUMAN Ezrin OS=Homo sapiens OX=9606 GN=EZR PE=1 SV=3                                                                               | EZR     | 7 | 7 | 9.040%  | 69370.88  | 5.87  |
| J9R021     | tr J9R021 J9R021_HUMAN Eukaryotic translation initiation factor 3 subunit A OS=Homo sapiens OX=9606 GN=eIF3a PE=2 eIF3a SV=1                        |         | 7 | 7 | 5.570%  | 166480.35 | 6.38  |
| P61313     | sp P61313 RL15_HUMAN 60S ribosomal protein L15 OS=Homo sapiens OX=9606 GN=RPL15 PE=1 SV=2                                                           | RPL15   | 8 | 6 | 30.390% | 24145.77  | 11.62 |
| F6KPG5     | tr F6KPG5 F6KPG5_HUMAN Albumin (Fragment) OS=Homo sapiens OX=9606 PE=2 SV=1                                                                         |         | 8 | 6 | 10.940% | 66530.6   | 5.73  |
| O00410     | sp O00410 IPO5_HUMAN Importin-5 OS=Homo sapiens OX=9606 GN=IPO5 PE=1 SV=4                                                                           | IPO5    | 7 | 6 | 9.210%  | 123628.63 | 4.83  |
| O60832     | sp O60832 DKC1_HUMAN H/ACA ribonucleoprotein complex subunit DKC1 OS=Homo sapiens OX=9606 GN=DKC1 PE=1 SV=3                                         | DKC1    | 7 | 6 | 12.260% | 57673.43  | 9.46  |
| P63151     | sp P63151 2ABA_HUMAN Serine/threonine-protein phosphatase 2A 55 kDa regulatory subunit B alpha isoform OS=Homo sapiens OX=9606 GN=PPP2R2A PE=1 SV=1 | PPP2R2A | 7 | 6 | 17.450% | 51691.5   | 5.82  |
| Q10567     | sp Q10567 AP1B1_HUMAN AP-1 complex subunit beta-1 OS=Homo sapiens OX=9606 GN=AP1B1 PE=1 SV=2                                                        | AP1B1   | 7 | 6 | 7.380%  | 104635.47 | 4.94  |
| Q93079     | sp Q93079 H2B1H_HUMAN Histone H2B type 1-H OS=Homo sapiens OX=9606 GN=H2BC9 PE=1 SV=3                                                               | H2BC9   | 7 | 6 | 46.030% | 13891.94  | 10.31 |
| A0A024R7T3 | tr A0A024R7T3 A0A024R7T3_HUMAN Heterogeneous nuclear ribonucleoprotein F, isoform CRA_a OS=Homo sapiens OX=9606 GN=HNRPF PE=4 SV=1                  | HNRPF   | 7 | 6 | 17.110% | 45671.36  | 5.38  |
| A0A024RBS3 | tr A0A024RBS3 A0A024RBS3_HUMAN Nuclear receptor co-repressor 2, isoform CRA_c OS=Homo sapiens OX=9606 GN=NCOR2 PE=1 SV=1                            | NCOR2   | 7 | 6 | 1.710%  | 273884.72 | 7.21  |
| A0A024RDB5 | tr A0A024RDB5 A0A024RDB5_HUMAN Heterogeneous nuclear ribonucleoprotein D-like, isoform CRA_a OS=Homo sapiens OX=9606 GN=HNRPDL PE=4 SV=1            | HNRPDL  | 7 | 6 | 16.670% | 46436.97  | 9.59  |

|            |                                                                                                                                       |   |   |         |           |       |
|------------|---------------------------------------------------------------------------------------------------------------------------------------|---|---|---------|-----------|-------|
| A0A384MTQ3 | tr A0A384MTQ3 A0A384MTQ3_HUMAN<br>Adenosylhomocysteinase OS=Homo sapiens OX=9606 PE=2 SV=1                                            | 7 | 6 | 14.580% | 47715.57  | 5.92  |
| A8KAQ5     | tr A8KAQ5 A8KAQ5_HUMAN U1 small nuclear<br>ribonucleoprotein 70 kDa OS=Homo sapiens OX=9606 PE=2 SV=1                                 | 7 | 6 | 11.900% | 51495.03  | 10.01 |
| B4DKP9     | tr B4DKP9 B4DKP9_HUMAN cDNA FLJ58012, moderately<br>similar to Eukaryotic initiation factor 4A-I OS=Homo sapiens<br>OX=9606 PE=2 SV=1 | 7 | 6 | 25.500% | 23258.87  | 5.49  |
| B5BU25     | tr B5BU25 B5BU25_HUMAN U2 snRNP auxiliary factor large<br>subunit OS=Homo sapiens OX=9606 GN=U2AF2 PE=2 SV=1 U2AF2                    | 7 | 6 | 16.770% | 53135.99  | 9.19  |
| G3V529     | tr G3V529 G3V529_HUMAN RNA helicase OS=Homo sapiens<br>OX=9606 GN=DDX24 PE=1 SV=1 DDX24                                               | 7 | 6 | 8.700%  | 91479.97  | 8.95  |
| Q53HU0     | tr Q53HU0 Q53HU0_HUMAN CCT-theta (Fragment) OS=Homo<br>sapiens OX=9606 PE=2 SV=1                                                      | 7 | 6 | 12.040% | 59649.96  | 5.42  |
| Q53Z07     | tr Q53Z07 Q53Z07_HUMAN 60S ribosomal protein L9<br>OS=Homo sapiens OX=9606 GN=RPL9 PE=2 SV=1 RPL9                                     | 7 | 6 | 29.690% | 21863.15  | 9.96  |
| Q6I9V5     | tr Q6I9V5 Q6I9V5_HUMAN ADP/ATP translocase OS=Homo<br>sapiens OX=9606 GN=SLC25A6 PE=2 SV=1 SLC25A6                                    | 7 | 6 | 19.130% | 32865.87  | 9.76  |
| O14617     | sp O14617 AP3D1_HUMAN AP-3 complex subunit delta-1<br>OS=Homo sapiens OX=9606 GN=AP3D1 PE=1 SV=1 AP3D1                                | 6 | 6 | 7.030%  | 130156.52 | 8.69  |
| O43175     | sp O43175 SERA_HUMAN D-3-phosphoglycerate<br>dehydrogenase OS=Homo sapiens OX=9606 GN=PHGDH PHGDH<br>PE=1 SV=4                        | 6 | 6 | 10.510% | 56649.88  | 6.29  |
| O43290     | sp O43290 SNUT1_HUMAN U4/U6.U5 tri-snRNP-associated<br>protein 1 OS=Homo sapiens OX=9606 GN=SART1 PE=1 SV=1 SART1                     | 6 | 6 | 9.630%  | 90253.73  | 5.89  |
| O94776     | sp O94776 MTA2_HUMAN Metastasis-associated protein MTA2<br>OS=Homo sapiens OX=9606 GN=MTA2 PE=1 SV=1 MTA2                             | 6 | 6 | 10.480% | 75022.25  | 9.7   |
| O95782     | sp O95782 AP2A1_HUMAN AP-2 complex subunit alpha-1<br>OS=Homo sapiens OX=9606 GN=AP2A1 PE=1 SV=3 AP2A1                                | 6 | 6 | 5.730%  | 107544.64 | 6.63  |

|        |                                                                                                                                                        |   |   |        |           |      |
|--------|--------------------------------------------------------------------------------------------------------------------------------------------------------|---|---|--------|-----------|------|
| P26639 | sp P26639 SYTC_HUMAN Threonine--tRNA ligase 1, cytoplasmic OS=Homo sapiens OX=9606 GN=TARS1 PE=1 TARS1 SV=3                                            | 6 | 6 | 7.610% | 83434.14  | 6.23 |
| P35241 | sp P35241 RADI_HUMAN Radixin OS=Homo sapiens OX=9606 GN=RDX PE=1 SV=1 RDX                                                                              | 6 | 6 | 6.690% | 68563.08  | 6.03 |
| Q00341 | sp Q00341 VIGLN_HUMAN Vigilin OS=Homo sapiens OX=9606 GN=HDLBP PE=1 SV=2 HDLBP                                                                         | 6 | 6 | 6.070% | 141453.95 | 6.43 |
| Q03701 | sp Q03701 CEBPZ_HUMAN CCAAT/enhancer-binding protein zeta OS=Homo sapiens OX=9606 GN=CEBPZ PE=1 SV=3 CEBPZ                                             | 6 | 6 | 5.500% | 120972.52 | 5.65 |
| Q07666 | sp Q07666 KHDR1_HUMAN KH domain-containing, RNA-binding, signal transduction-associated protein 1 OS=Homo sapiens OX=9606 GN=KHDRBS1 PE=1 SV=1 KHDRBS1 | 6 | 6 | 9.480% | 48226.78  | 8.73 |
| Q08J23 | sp Q08J23 NSUN2_HUMAN RNA cytosine C(5)-methyltransferase NSUN2 OS=Homo sapiens OX=9606 GN=NSUN2 PE=1 SV=2 NSUN2                                       | 6 | 6 | 5.740% | 86469.73  | 6.33 |
| Q14151 | sp Q14151 SAFB2_HUMAN Scaffold attachment factor B2 OS=Homo sapiens OX=9606 GN=SAFB2 PE=1 SV=1 SAFB2                                                   | 6 | 6 | 7.240% | 107472.21 | 5.84 |
| Q15020 | sp Q15020 SART3_HUMAN Squamous cell carcinoma antigen recognized by T-cells 3 OS=Homo sapiens OX=9606 GN=SART3 PE=1 SV=1 SART3                         | 6 | 6 | 6.130% | 109933.26 | 5.45 |
| Q15459 | sp Q15459 SF3A1_HUMAN Splicing factor 3A subunit 1 OS=Homo sapiens OX=9606 GN=SF3A1 PE=1 SV=1 SF3A1                                                    | 6 | 6 | 6.810% | 88885.11  | 5.15 |
| Q92616 | sp Q92616 GCN1_HUMAN eIF-2-alpha kinase activator GCN1 OS=Homo sapiens OX=9606 GN=GCN1 PE=1 SV=6 GCN1                                                  | 6 | 6 | 3.440% | 292754.88 | 7.29 |
| Q92621 | sp Q92621 NU205_HUMAN Nuclear pore complex protein Nup205 OS=Homo sapiens OX=9606 GN=NUP205 PE=1 SV=3 NUP205                                           | 6 | 6 | 3.230% | 227918.89 | 5.81 |
| Q92900 | sp Q92900 RENT1_HUMAN Regulator of nonsense transcripts 1 OS=Homo sapiens OX=9606 GN=UPF1 PE=1 SV=2 UPF1                                               | 6 | 6 | 5.850% | 124343.85 | 6.18 |
| Q9P2B4 | sp Q9P2B4 CT2NL_HUMAN CTTNBP2 N-terminal-like protein OS=Homo sapiens OX=9606 GN=CTTNBP2NL PE=1 SV=2 CTTNBP2NL                                         | 6 | 6 | 9.550% | 70157.18  | 8.22 |

|            |                                                                                                                                                                                                                  |         |   |   |         |           |      |
|------------|------------------------------------------------------------------------------------------------------------------------------------------------------------------------------------------------------------------|---------|---|---|---------|-----------|------|
| Q9Y230     | sp Q9Y230 RUVB2_HUMAN RuvB-like 2 OS=Homo sapiens<br>OX=9606 GN=RUVBL2 PE=1 SV=3                                                                                                                                 | RUVBL2  | 6 | 6 | 13.820% | 51155.99  | 5.49 |
| A0A087WX41 | tr A0A087WX41 A0A087WX41_HUMAN Clathrin heavy chain 2<br>OS=Homo sapiens OX=9606 GN=CLTCL1 PE=1 SV=1                                                                                                             | CLTCL1  | 6 | 6 | 5.710%  | 142456.25 | 6.01 |
| A0A140VJY2 | tr A0A140VJY2 A0A140VJY2_HUMAN Testicular tissue protein<br>Li 209 OS=Homo sapiens OX=9606 PE=2 SV=1                                                                                                             |         | 6 | 6 | 10.090% | 80109.04  | 8.3  |
| A0A669KBC2 | tr A0A669KBC2 A0A669KBC2_HUMAN Cyclin-dependent<br>kinase-like 5 OS=Homo sapiens OX=9606 GN=CDKL5 PE=1 CDKL5<br>SV=1                                                                                             | CDKL5   | 6 | 6 | 7.290%  | 112020.29 | 9.61 |
| A0A6Q8PFA6 | tr A0A6Q8PFA6 A0A6Q8PFA6_HUMAN Kinesin-like protein<br>OS=Homo sapiens OX=9606 GN=KIF2A PE=1 SV=1                                                                                                                | KIF2A   | 6 | 6 | 6.700%  | 78041.54  | 6.28 |
| A0A6Q8PFM5 | tr A0A6Q8PFM5 A0A6Q8PFM5_HUMAN Apoptosis-inducing<br>factor 1, mitochondrial OS=Homo sapiens OX=9606 GN=AIFM1 AIFM1<br>PE=1 SV=1                                                                                 | AIFM1   | 6 | 6 | 12.420% | 66800.67  | 9.04 |
| A0A7I2V5S2 | tr A0A7I2V5S2 A0A7I2V5S2_HUMAN Nucleophosmin<br>OS=Homo sapiens OX=9606 GN=NPM1 PE=1 SV=1                                                                                                                        | NPM1    | 6 | 6 | 16.390% | 33875.25  | 4.68 |
| A0A7P0T8C6 | tr A0A7P0T8C6 A0A7P0T8C6_HUMAN Zinc finger CCCH-type<br>antiviral protein 1 OS=Homo sapiens OX=9606 GN=ZC3HAV1 ZC3HAV1<br>PE=1 SV=1                                                                              | ZC3HAV1 | 6 | 6 | 11.490% | 85194.55  | 8.95 |
| A3F768     | tr A3F768 A3F768_HUMAN NF-kappaB repressing factor<br>OS=Homo sapiens OX=9606 GN=NRF PE=2 SV=1                                                                                                                   | NRF     | 6 | 6 | 7.540%  | 77572.87  | 8.9  |
| A8K3H8     | tr A8K3H8 A8K3H8_HUMAN cDNA FLJ77680, highly similar to<br>Homo sapiens protein phosphatase 2 (formerly 2A), regulatory<br>subunit A (PR 65), alpha isoform (PPP2R1A), mRNA OS=Homo<br>sapiens OX=9606 PE=2 SV=1 |         | 6 | 6 | 12.050% | 65291.81  | 5    |
| A8K586     | tr A8K586 A8K586_HUMAN AP-3 complex subunit beta<br>OS=Homo sapiens OX=9606 PE=2 SV=1                                                                                                                            |         | 6 | 6 | 6.030%  | 121288.68 | 5.71 |
| B0AZQ4     | tr B0AZQ4 B0AZQ4_HUMAN Structural maintenance of<br>chromosomes protein OS=Homo sapiens OX=9606 PE=2 SV=1                                                                                                        |         | 6 | 6 | 6.160%  | 141527.96 | 6.77 |

|            |                                                                                                                                                                       |           |   |   |         |           |       |
|------------|-----------------------------------------------------------------------------------------------------------------------------------------------------------------------|-----------|---|---|---------|-----------|-------|
| J3KTE4     | tr J3KTE4 J3KTE4_HUMAN Ribosomal protein L19 OS=Homo sapiens OX=9606 GN=RPL19 PE=1 SV=1                                                                               | RPL19     | 6 | 6 | 24.230% | 23247.44  | 11.48 |
| Q53G55     | tr Q53G55 Q53G55_HUMAN TNF receptor-associated protein 1 variant (Fragment) OS=Homo sapiens OX=9606 PE=2 SV=1                                                         |           | 6 | 6 | 8.380%  | 80037.92  | 8.05  |
| V5YQL4     | tr V5YQL4 V5YQL4_HUMAN Adenosylhomocysteinase OS=Homo sapiens OX=9606 GN=FGFR2-AHCYL1 PE=2 SV=1                                                                       | FGFR2-AHC | 6 | 6 | 4.360%  | 130895.34 | 6.34  |
| W8QEH3     | tr W8QEH3 W8QEH3_HUMAN Lamin A/C OS=Homo sapiens OX=9606 GN=LMNA PE=3 SV=1                                                                                            | LMNA      | 6 | 6 | 10.490% | 65115.95  | 6.4   |
| Q68D71     | tr Q68D71 Q68D71_HUMAN Histone deacetylase OS=Homo sapiens OX=9606 GN=DKFZp779K1053 PE=2 SV=1                                                                         | DKFZp779K | 8 | 5 | 5.730%  | 66302.33  | 9.07  |
| P21796     | sp P21796 VDAC1_HUMAN Voltage-dependent anion-selective channel protein 1 OS=Homo sapiens OX=9606 GN=VDAC1 VDAC1 PE=1 SV=2                                            |           | 6 | 5 | 16.610% | 30772.21  | 8.62  |
| P30050     | sp P30050 RL12_HUMAN 60S ribosomal protein L12 OS=Homo sapiens OX=9606 GN=RPL12 PE=1 SV=1                                                                             | RPL12     | 6 | 5 | 36.970% | 17818.38  | 9.48  |
| P62910     | sp P62910 RL32_HUMAN 60S ribosomal protein L32 OS=Homo sapiens OX=9606 GN=RPL32 PE=1 SV=2                                                                             | RPL32     | 6 | 5 | 32.590% | 15859.62  | 11.32 |
| Q58FF6     | sp Q58FF6 H90B4_HUMAN Putative heat shock protein HSP90-beta 4 OS=Homo sapiens OX=9606 GN=HSP90AB4P PE=5 SV=1                                                         | HSP90AB4P | 6 | 5 | 9.900%  | 58263.73  | 4.65  |
| A0A024R1T9 | tr A0A024R1T9 A0A024R1T9_HUMAN ATP-citrate synthase OS=Homo sapiens OX=9606 GN=ACLY PE=3 SV=1                                                                         | ACLY      | 6 | 5 | 4.180%  | 120837.85 | 6.95  |
| A0A384NPH0 | tr A0A384NPH0 A0A384NPH0_HUMAN Epididymis secretory sperm binding protein OS=Homo sapiens OX=9606 PE=2 SV=1                                                           |           | 6 | 5 | 7.830%  | 67688.02  | 5.29  |
| B4DR36     | tr B4DR36 B4DR36_HUMAN cDNA FLJ56414, highly similar to Homo sapiens proline-, glutamic acid-, leucine-rich protein 1 (PELP1), mRNA OS=Homo sapiens OX=9606 PE=2 SV=1 |           | 6 | 5 | 5.680%  | 124866.11 | 4.38  |
| B5MDF5     | tr B5MDF5 B5MDF5_HUMAN GTP-binding nuclear protein Ran OS=Homo sapiens OX=9606 GN=RAN PE=1 SV=1                                                                       | RAN       | 6 | 5 | 24.030% | 26223.86  | 6.5   |

|        |                                                                                                                                       |   |   |         |           |       |
|--------|---------------------------------------------------------------------------------------------------------------------------------------|---|---|---------|-----------|-------|
| E9PF82 | tr E9PF82 E9PF82_HUMAN Calcium/calmodulin-dependent protein kinase OS=Homo sapiens OX=9606 GN=CAMK2D CAMK2D PE=1 SV=1                 | 6 | 5 | 9.940%  | 60003.88  | 6.84  |
| Q99529 | tr Q99529 Q99529_HUMAN Non-muscle myosin heavy chain (Fragment) OS=Homo sapiens OX=9606 PE=2 SV=1                                     | 6 | 5 | 35.100% | 24440.28  | 4.87  |
| Q9BTQ7 | tr Q9BTQ7 Q9BTQ7_HUMAN 60S ribosomal protein L23 (Fragment) OS=Homo sapiens OX=9606 PE=2 SV=1                                         | 6 | 5 | 41.040% | 14149.41  | 10.26 |
| O00178 | sp O00178 GTPB1_HUMAN GTP-binding protein 1 OS=Homo sapiens OX=9606 GN=GTPBP1 PE=1 SV=3 GTPBP1                                        | 5 | 5 | 10.010% | 72453.03  | 8.6   |
| P06737 | sp P06737 PYGL_HUMAN Glycogen phosphorylase, liver form OS=Homo sapiens OX=9606 GN=PYGL PE=1 SV=4 PYGL                                | 5 | 5 | 5.080%  | 97147.43  | 6.71  |
| P07197 | sp P07197 NFM_HUMAN Neurofilament medium polypeptide OS=Homo sapiens OX=9606 GN=NEFM PE=1 SV=3 NEFM                                   | 5 | 5 | 5.680%  | 102470.79 | 4.9   |
| P0CG39 | sp P0CG39 POTEJ_HUMAN POTE ankyrin domain family member J OS=Homo sapiens OX=9606 GN=POTEJ PE=3 SV=1 POTEJ                            | 5 | 5 | 4.720%  | 117388.73 | 5.66  |
| P27348 | sp P27348 1433T_HUMAN 14-3-3 protein theta OS=Homo sapiens OX=9606 GN=YWHAQ PE=1 SV=1 YWHAQ                                           | 5 | 5 | 20.820% | 27763.94  | 4.68  |
| P28331 | sp P28331 NDUS1_HUMAN NADH-ubiquinone oxidoreductase 75 kDa subunit, mitochondrial OS=Homo sapiens OX=9606 GN=NDUFS1 PE=1 SV=3 NDUFS1 | 5 | 5 | 7.980%  | 79466.66  | 5.89  |
| P46777 | sp P46777 RPL5_HUMAN 60S ribosomal protein L5 OS=Homo sapiens OX=9606 GN=RPL5 PE=1 SV=3 RPL5                                          | 5 | 5 | 14.810% | 34362.24  | 9.73  |
| P50991 | sp P50991 TCPD_HUMAN T-complex protein 1 subunit delta OS=Homo sapiens OX=9606 GN=CCT4 PE=1 SV=4 CCT4                                 | 5 | 5 | 9.280%  | 57923.6   | 7.96  |
| P56192 | sp P56192 SYMC_HUMAN Methionine--tRNA ligase, cytoplasmic OS=Homo sapiens OX=9606 GN=MARS1 PE=1 SV=2 MARS1                            | 5 | 5 | 6.670%  | 101114.58 | 5.82  |
| P62899 | sp P62899 RPL31_HUMAN 60S ribosomal protein L31 OS=Homo sapiens OX=9606 GN=RPL31 PE=1 SV=1 RPL31                                      | 5 | 5 | 35.200% | 14462.69  | 10.54 |

|            |                                                                                                                                        |        |   |   |         |           |       |
|------------|----------------------------------------------------------------------------------------------------------------------------------------|--------|---|---|---------|-----------|-------|
| P78371     | sp P78371 TCPB_HUMAN T-complex protein 1 subunit beta<br>OS=Homo sapiens OX=9606 GN=CCT2 PE=1 SV=4                                     | CCT2   | 5 | 5 | 12.340% | 57487.56  | 6.01  |
| P83881     | sp P83881 RL36A_HUMAN 60S ribosomal protein L36a<br>OS=Homo sapiens OX=9606 GN=RPL36A PE=1 SV=2                                        | RPL36A | 5 | 5 | 32.080% | 12440.69  | 10.59 |
| Q13435     | sp Q13435 SF3B2_HUMAN Splicing factor 3B subunit 2<br>OS=Homo sapiens OX=9606 GN=SF3B2 PE=1 SV=2                                       | SF3B2  | 5 | 5 | 4.920%  | 100226.38 | 5.52  |
| Q8TDN6     | sp Q8TDN6 BRX1_HUMAN Ribosome biogenesis protein BRX1<br>homolog OS=Homo sapiens OX=9606 GN=BRX1 PE=1 SV=2                             | BRX1   | 5 | 5 | 12.460% | 41400.87  | 9.92  |
| Q8WXF1     | sp Q8WXF1 PSPC1_HUMAN Paraspeckle component 1<br>OS=Homo sapiens OX=9606 GN=PSPC1 PE=1 SV=1                                            | PSPC1  | 5 | 5 | 8.410%  | 58742.95  | 6.26  |
| Q93009     | sp Q93009 UBP7_HUMAN Ubiquitin carboxyl-terminal<br>hydrolase 7 OS=Homo sapiens OX=9606 GN=USP7 PE=1 SV=2                              | USP7   | 5 | 5 | 4.360%  | 128300.67 | 5.33  |
| Q99613     | sp Q99613 EIF3C_HUMAN Eukaryotic translation initiation<br>factor 3 subunit C OS=Homo sapiens OX=9606 GN=EIF3C EIF3C<br>PE=1 SV=1      | EIF3C  | 5 | 5 | 4.710%  | 105342.62 | 5.48  |
| Q9UQ80     | sp Q9UQ80 PA2G4_HUMAN Proliferation-associated protein<br>2G4 OS=Homo sapiens OX=9606 GN=PA2G4 PE=1 SV=3                               | PA2G4  | 5 | 5 | 12.440% | 43786.38  | 6.13  |
| A0A024QZN9 | tr A0A024QZN9 A0A024QZN9_HUMAN Outer mitochondrial<br>membrane protein porin 2 OS=Homo sapiens OX=9606 VDAC2<br>GN=VDAC2 PE=3 SV=1     | VDAC2  | 5 | 5 | 14.110% | 34480.45  | 8.25  |
| A0A024R2Z6 | tr A0A024R2Z6 A0A024R2Z6_HUMAN Guanine nucleotide-<br>binding protein-like 3 OS=Homo sapiens OX=9606 GN=GNL3 GNL3<br>PE=4 SV=1         | GNL3   | 5 | 5 | 8.940%  | 60571.67  | 8.94  |
| A0A0S2Z2Z6 | tr A0A0S2Z2Z6 A0A0S2Z2Z6_HUMAN Annexin (Fragment)<br>OS=Homo sapiens OX=9606 GN=ANXA6 PE=2 SV=1                                        | ANXA6  | 5 | 5 | 7.880%  | 75872.41  | 5.42  |
| A0A494C0M1 | tr A0A494C0M1 A0A494C0M1_HUMAN DNA mismatch repair<br>protein OS=Homo sapiens OX=9606 GN=MSH6 PE=1 SV=1                                | MSH6   | 5 | 5 | 3.330%  | 142852.92 | 6.11  |
| A0A5K1VW56 | tr A0A5K1VW56 A0A5K1VW56_HUMAN ATPase family AAA<br>domain-containing protein 3B OS=Homo sapiens OX=9606 ATAD3B<br>GN=ATAD3B PE=1 SV=1 | ATAD3B | 5 | 5 | 14.770% | 32548.81  | 9.95  |

|            |                                                                                                                                                     |   |   |         |           |       |
|------------|-----------------------------------------------------------------------------------------------------------------------------------------------------|---|---|---------|-----------|-------|
| A0A6Q8PGW4 | tr A0A6Q8PGW4 A0A6Q8PGW4_HUMAN Diadenosine tetraphosphate synthetase OS=Homo sapiens OX=9606 GARS1 GN=GARS1 PE=1 SV=1                               | 5 | 5 | 8.600%  | 69931.08  | 5.79  |
| A0A7G6J4N4 | tr A0A7G6J4N4 A0A7G6J4N4_HUMAN Ubiquitin carboxyl-terminal hydrolase OS=Homo sapiens OX=9606 PE=2 SV=1                                              | 5 | 5 | 7.980%  | 87532.22  | 5.16  |
| A0A7I2V3W6 | tr A0A7I2V3W6 A0A7I2V3W6_HUMAN Exportin-1 OS=Homo sapiens OX=9606 GN=XPO1 PE=1 SV=1                                                                 | 5 | 5 | 5.110%  | 115155.2  | 5.79  |
| B0ZBD0     | tr B0ZBD0 B0ZBD0_HUMAN 40S ribosomal protein S19 OS=Homo sapiens OX=9606 GN=RPS19 PE=2 SV=1                                                         | 5 | 5 | 31.720% | 16060.31  | 10.31 |
| B2R4V2     | tr B2R4V2 B2R4V2_HUMAN cDNA, FLJ92227, highly similar to Homo sapiens ribosomal protein L36a-like (RPL36AL), mRNA OS=Homo sapiens OX=9606 PE=2 SV=1 | 5 | 5 | 32.080% | 12526.83  | 10.67 |
| B2ZZ89     | tr B2ZZ89 B2ZZ89_HUMAN Spectrin beta chain OS=Homo sapiens OX=9606 GN=SPTBN1 PE=2 SV=1                                                              | 5 | 5 | 2.750%  | 274606.02 | 5.39  |
| B4DLG2     | tr B4DLG2 B4DLG2_HUMAN cDNA FLJ58196, highly similar to Zinc finger CCCH domain-containing protein 11A OS=Homo sapiens OX=9606 PE=2 SV=1            | 5 | 5 | 7.010%  | 82770.96  | 8.79  |
| G8JLG1     | tr G8JLG1 G8JLG1_HUMAN Structural maintenance of chromosomes protein OS=Homo sapiens OX=9606 SMC1A GN=SMC1A PE=1 SV=2                               | 5 | 5 | 3.720%  | 140857.48 | 7.08  |
| H3BRG4     | tr H3BRG4 H3BRG4_HUMAN Cytochrome b-c1 complex subunit 2, mitochondrial OS=Homo sapiens OX=9606 UQCRC2 GN=UQCRC2 PE=1 SV=1                          | 5 | 5 | 13.350% | 44634.14  | 9.08  |
| I6L9H2     | tr I6L9H2 I6L9H2_HUMAN DNA (cytosine-5)-methyltransferase OS=Homo sapiens OX=9606 GN=DNMT1 PE=2 SV=1                                                | 5 | 5 | 3.900%  | 171071.49 | 8.09  |
| J3QRC4     | tr J3QRC4 J3QRC4_HUMAN 60S ribosomal protein L26 (Fragment) OS=Homo sapiens OX=9606 GN=RPL26 PE=3 RPL26 SV=1                                        | 5 | 5 | 24.440% | 15639.78  | 11.22 |
| Q4G0D9     | tr Q4G0D9 Q4G0D9_HUMAN BOP1 protein (Fragment) OS=Homo sapiens OX=9606 GN=BOP1 PE=2 SV=1                                                            | 5 | 5 | 8.640%  | 64080.1   | 9.38  |
| Q53EM5     | tr Q53EM5 Q53EM5_HUMAN Transketolase variant (Fragment) OS=Homo sapiens OX=9606 PE=2 SV=1                                                           | 5 | 5 | 11.720% | 67904.91  | 7.89  |



|        |                                                                                                                                     |           |   |   |         |           |      |
|--------|-------------------------------------------------------------------------------------------------------------------------------------|-----------|---|---|---------|-----------|------|
| Q53GR7 | tr Q53GR7 Q53GR7_HUMAN Solute carrier family 25, member 13 (Citrin) variant (Fragment) OS=Homo sapiens OX=9606 PE=2 SV=1            |           | 5 | 5 | 7.410%  | 74115.51  | 8.58 |
| Q59HH3 | tr Q59HH3 Q59HH3_HUMAN Trifunctional purine biosynthetic protein adenosine-3 (Fragment) OS=Homo sapiens OX=9606 PE=2 SV=1           |           | 5 | 5 | 4.490%  | 112136.98 | 7.14 |
| Q5TDG3 | tr Q5TDG3 Q5TDG3_HUMAN WD repeat domain 3, isoform CRA_b OS=Homo sapiens OX=9606 GN=WDR3 PE=2 SV=1                                  | WDR3      | 5 | 5 | 5.200%  | 106097.69 | 6.2  |
| Q6NZ52 | tr Q6NZ52 Q6NZ52_HUMAN 60S ribosomal protein L27a OS=Homo sapiens OX=9606 GN=RPL27A PE=2 SV=1                                       | RPL27A    | 5 | 5 | 34.460% | 16478.09  | 11   |
| V9HW31 | tr V9HW31 V9HW31_HUMAN ATP synthase subunit beta OS=Homo sapiens OX=9606 GN=HEL-S-271 PE=1 SV=1                                     | HEL-S-271 | 5 | 5 | 8.320%  | 56559.22  | 5.26 |
| V9HW88 | tr V9HW88 V9HW88_HUMAN Calreticulin OS=Homo sapiens OX=9606 GN=HEL-S-99n PE=2 SV=1                                                  | HEL-S-99n | 5 | 5 | 11.270% | 48140.96  | 4.29 |
| Q14974 | sp Q14974 IMB1_HUMAN Importin subunit beta-1 OS=Homo sapiens OX=9606 GN=KPNB1 PE=1 SV=2                                             | KPNB1     | 6 | 4 | 6.740%  | 97169.13  | 4.68 |
| P46782 | sp P46782 RS5_HUMAN 40S ribosomal protein S5 OS=Homo sapiens OX=9606 GN=RPS5 PE=1 SV=4                                              | RPS5      | 5 | 4 | 24.510% | 22876.13  | 9.73 |
| P62266 | sp P62266 RS23_HUMAN 40S ribosomal protein S23 OS=Homo sapiens OX=9606 GN=RPS23 PE=1 SV=3                                           | RPS23     | 5 | 4 | 27.270% | 15807.36  | 10.5 |
| Q9H2U1 | sp Q9H2U1 DHX36_HUMAN ATP-dependent DNA/RNA helicase DHX36 OS=Homo sapiens OX=9606 GN=DHX36 PE=1 SV=2                               | DHX36     | 5 | 4 | 5.360%  | 114758.8  | 7.58 |
| A4FTV9 | tr A4FTV9 A4FTV9_HUMAN Histone H2A OS=Homo sapiens OX=9606 GN=HIST1H2AK PE=1 SV=1                                                   | HIST1H2AK | 5 | 4 | 32.310% | 14091.3   | 10.9 |
| B4DMK9 | tr B4DMK9 B4DMK9_HUMAN Dihydrolipoyl dehydrogenase OS=Homo sapiens OX=9606 PE=2 SV=1                                                |           | 5 | 4 | 9.470%  | 51787.86  | 8.04 |
| B4E312 | tr B4E312 B4E312_HUMAN cDNA FLJ53422, highly similar to TATA-binding protein-associated factor 2N OS=Homo sapiens OX=9606 PE=2 SV=1 |           | 5 | 4 | 10.130% | 40077.8   | 9.5  |

|        |                                                                             |                                                                                            |   |   |         |           |      |
|--------|-----------------------------------------------------------------------------|--------------------------------------------------------------------------------------------|---|---|---------|-----------|------|
| D6RD18 | tr D6RD18 D6RD18_HUMAN<br>ribonucleoprotein A/B<br>GN=HNRNPAB PE=1 SV=1     | Heterogeneous nuclear<br>OS=Homo sapiens OX=9606 HNRNPAB                                   | 5 | 4 | 16.610% | 30473.57  | 7.69 |
| Q2TU64 | tr Q2TU64 Q2TU64_HUMAN<br>gamma OS=Homo sapiens OX=9606 PE=2 SV=1           | T-complex protein 1 subunit                                                                | 5 | 4 | 8.260%  | 60578.26  | 5.99 |
| U5UA77 | tr U5UA77 U5UA77_HUMAN<br>6 OS=Homo sapiens OX=9606 PE=2 SV=1               | Dyskeratosis congenita 1 isoform                                                           | 5 | 4 | 11.180% | 35113.04  | 9.51 |
| A6NHR9 | sp A6NHR9 SMHD1_HUMAN<br>OS=Homo sapiens OX=9606 GN=SMCHD1 PE=1 SV=2        | Structural maintenance of<br>chromosomes flexible hinge domain-containing protein 1 SMCHD1 | 4 | 4 | 2.740%  | 226370.88 | 6.95 |
| O14646 | sp O14646 CHD1_HUMAN<br>SV=2                                                | Chromodomain-helicase-DNA-<br>binding protein 1 OS=Homo sapiens OX=9606 GN=CHD1 PE=1 CHD1  | 4 | 4 | 1.580%  | 196685.2  | 6.68 |
| O15381 | sp O15381 NVL_HUMAN<br>like OS=Homo sapiens OX=9606 GN=NVL PE=1 SV=1        | Nuclear valosin-containing protein-<br>like NVL                                            | 4 | 4 | 5.840%  | 95049.81  | 6.11 |
| O75367 | sp O75367 H2AY_HUMAN<br>OS=Homo sapiens OX=9606 GN=MACROH2A1 PE=1 SV=4      | Core histone macro-H2A.1<br>MACROH2A                                                       | 4 | 4 | 15.590% | 39616.57  | 9.8  |
| O95757 | sp O95757 HS74L_HUMAN<br>OS=Homo sapiens OX=9606 GN=HSPA4L PE=1 SV=3        | Heat shock 70 kDa protein 4L<br>HSPA4L                                                     | 4 | 4 | 4.770%  | 94511.45  | 5.63 |
| P05455 | sp P05455 LA_HUMAN<br>OX=9606 GN=SSB PE=1 SV=2                              | Lupus La protein OS=Homo sapiens<br>SSB                                                    | 4 | 4 | 8.580%  | 46836.48  | 6.68 |
| P17812 | sp P17812 PYRG1_HUMAN<br>sapiens OX=9606 GN=CTPS1 PE=1 SV=2                 | CTP synthase 1 OS=Homo<br>CTPS1                                                            | 4 | 4 | 9.480%  | 66689.59  | 6.02 |
| P19367 | sp P19367 HXX1_HUMAN<br>OX=9606 GN=HK1 PE=1 SV=3                            | Hexokinase-1 OS=Homo sapiens<br>HK1                                                        | 4 | 4 | 4.580%  | 102484.82 | 6.36 |
| P31689 | sp P31689 DNJA1_HUMAN<br>1 OS=Homo sapiens OX=9606 GN=DNAJA1 PE=1 SV=2      | DnaJ homolog subfamily A member<br>DNAJA1                                                  | 4 | 4 | 9.570%  | 44867.72  | 6.65 |
| P39656 | sp P39656 OST48_HUMAN<br>subunit OS=Homo sapiens OX=9606 GN=DDOST PE=1 SV=4 | Dolichyl-<br>diphosphooligosaccharide--protein glycosyltransferase 48 kDa DDOST            | 4 | 4 | 8.330%  | 50800.18  | 6.09 |

|            |                                                                                                                               |         |   |   |         |           |      |
|------------|-------------------------------------------------------------------------------------------------------------------------------|---------|---|---|---------|-----------|------|
| P54136     | sp P54136 SYRC_HUMAN Arginine--tRNA ligase, cytoplasmic OS=Homo sapiens OX=9606 GN=RARS1 PE=1 SV=2                            | RARS1   | 4 | 4 | 6.820%  | 75378.13  | 6.26 |
| P67809     | sp P67809 YBOX1_HUMAN Y-box-binding protein 1 OS=Homo sapiens OX=9606 GN=YBX1 PE=1 SV=3                                       | YBX1    | 4 | 4 | 16.360% | 35923.75  | 9.87 |
| Q15046     | sp Q15046 SYK_HUMAN Lysine--tRNA ligase OS=Homo sapiens OX=9606 GN=KARS1 PE=1 SV=3                                            | KARS1   | 4 | 4 | 5.360%  | 68047.3   | 5.94 |
| Q5QJE6     | sp Q5QJE6 TDIF2_HUMAN Deoxynucleotidyltransferase terminal-interacting protein 2 OS=Homo sapiens OX=9606 GN=DNTTIP2 PE=1 SV=2 | DNTTIP2 | 4 | 4 | 6.080%  | 84468.05  | 5.86 |
| Q8TED0     | sp Q8TED0 UTP15_HUMAN U3 small nucleolar RNA-associated protein 15 homolog OS=Homo sapiens OX=9606 GN=UTP15 PE=1 SV=3         | UTP15   | 4 | 4 | 8.300%  | 58414.5   | 9.18 |
| Q8WTT2     | sp Q8WTT2 NOC3L_HUMAN Nucleolar complex protein 3 homolog OS=Homo sapiens OX=9606 GN=NOC3L PE=1 SV=1                          | NOC3L   | 4 | 4 | 7.380%  | 92546.66  | 9.22 |
| Q92974     | sp Q92974 ARHG2_HUMAN Rho guanine nucleotide exchange factor 2 OS=Homo sapiens OX=9606 GN=ARHGEF2 PE=1 SV=4                   | ARHGEF2 | 4 | 4 | 3.750%  | 111541.29 | 6.89 |
| Q99661     | sp Q99661 KIF2C_HUMAN Kinesin-like protein OS=Homo sapiens OX=9606 GN=KIF2C PE=1 SV=2                                         | KIF2C   | 4 | 4 | 5.100%  | 81312.04  | 8.03 |
| Q9H0U4     | sp Q9H0U4 RAB1B_HUMAN Ras-related protein OS=Homo sapiens OX=9606 GN=RAB1B PE=1 SV=1                                          | RAB1B   | 4 | 4 | 18.410% | 22170.9   | 5.55 |
| Q9H8H0     | sp Q9H8H0 NOL11_HUMAN Nucleolar protein 11 OS=Homo sapiens OX=9606 GN=NOL11 PE=1 SV=1                                         | NOL11   | 4 | 4 | 4.730%  | 81122.66  | 5.74 |
| Q9NYU2     | sp Q9NYU2 UGGG1_HUMAN UDP-glucose:glycoprotein glucosyltransferase 1 OS=Homo sapiens OX=9606 GN=UGGT1 PE=1 SV=3               | UGGT1   | 4 | 4 | 2.570%  | 177187.43 | 5.42 |
| Q9Y262     | sp Q9Y262 EIF3L_HUMAN Eukaryotic translation initiation factor 3 subunit L OS=Homo sapiens OX=9606 GN=EIF3L PE=1 SV=1         | EIF3L   | 4 | 4 | 6.030%  | 66726.18  | 5.93 |
| A0A024R3R5 | tr A0A024R3R5 A0A024R3R5_HUMAN 3-beta-hydroxysterol Delta (14)-reductase OS=Homo sapiens OX=9606 GN=LBR PE=3 SV=1             | LBR     | 4 | 4 | 7.800%  | 70729.36  | 9.41 |

|            |                                                                                                                                                                  |       |   |   |         |           |       |
|------------|------------------------------------------------------------------------------------------------------------------------------------------------------------------|-------|---|---|---------|-----------|-------|
| A0A024RAV2 | tr A0A024RAV2 A0A024RAV2_HUMAN ATP-dependent DNA helicase OS=Homo sapiens OX=9606 GN=RECQL PE=3 SV=1                                                             | RECQL | 4 | 4 | 5.390%  | 73456.57  | 8.13  |
| A0A087WT20 | tr A0A087WT20 A0A087WT20_HUMAN DDB1- and CUL4-associated factor 13 OS=Homo sapiens OX=9606 GN=DCAF13 DCAF13 PE=1 SV=1                                            |       | 4 | 4 | 7.370%  | 67550.43  | 9.4   |
| A0A087WYN9 | tr A0A087WYN9 A0A087WYN9_HUMAN ATP-dependent RNA helicase DHX29 OS=Homo sapiens OX=9606 GN=DHX29 DHX29 PE=1 SV=1                                                 |       | 4 | 4 | 2.850%  | 155289.85 | 8.37  |
| A0A0B4J2E5 | tr A0A0B4J2E5 A0A0B4J2E5_HUMAN Utp12 domain-containing protein OS=Homo sapiens OX=9606 LOC102724 GN=LOC102724159 PE=1 SV=1                                       |       | 4 | 4 | 3.810%  | 102449.89 | 5.81  |
| A0A140VJQ4 | tr A0A140VJQ4 A0A140VJQ4_HUMAN Ornithine--oxo-acid aminotransferase OS=Homo sapiens OX=9606 PE=2 SV=1                                                            |       | 4 | 4 | 8.660%  | 48534.24  | 6.57  |
| A0A2R8YE38 | tr A0A2R8YE38 A0A2R8YE38_HUMAN Chromodomain-helicase-DNA-binding protein 4 (Fragment) OS=Homo sapiens CHD4 OX=9606 GN=CHD4 PE=1 SV=1                             |       | 4 | 4 | 9.170%  | 52145.03  | 4.68  |
| A0A3B3IU45 | tr A0A3B3IU45 A0A3B3IU45_HUMAN DNA replication licensing factor MCM4 OS=Homo sapiens OX=9606 GN=MCM4 PE=1 MCM4 SV=1                                              |       | 4 | 4 | 6.270%  | 91190.12  | 5.96  |
| A0A494C001 | tr A0A494C001 A0A494C001_HUMAN RNA-binding protein 15 OS=Homo sapiens OX=9606 GN=RBM15 PE=1 SV=2                                                                 | RBM15 | 4 | 4 | 6.700%  | 98012.88  | 10.06 |
| A0A590UK80 | tr A0A590UK80 A0A590UK80_HUMAN Uncharacterized protein (Fragment) OS=Homo sapiens OX=9606 PE=3 SV=1                                                              |       | 4 | 4 | 3.940%  | 120933.43 | 6.38  |
| A0A7I2YQE1 | tr A0A7I2YQE1 A0A7I2YQE1_HUMAN Importin subunit alpha OS=Homo sapiens OX=9606 GN=KPNA2 PE=1 SV=1                                                                 | KPNA2 | 4 | 4 | 11.910% | 57830.3   | 5.46  |
| A0A804CDA6 | tr A0A804CDA6 A0A804CDA6_HUMAN Dynactin subunit 1 OS=Homo sapiens OX=9606 GN=DCTN1 PE=4 SV=1                                                                     | DCTN1 | 4 | 4 | 3.060%  | 141022.55 | 5.63  |
| A8K3Y5     | tr A8K3Y5 A8K3Y5_HUMAN cDNA FLJ78186 OS=Homo sapiens OX=9606 PE=2 SV=1                                                                                           |       | 4 | 4 | 12.930% | 43622.3   | 9.59  |
| A8K6I4     | tr A8K6I4 A8K6I4_HUMAN cDNA FLJ76877, highly similar to Homo sapiens superkiller viralicidic activity 2-like 2 (SKIV2L2), mRNA OS=Homo sapiens OX=9606 PE=2 SV=1 |       | 4 | 4 | 4.990%  | 117897.47 | 6.12  |

|        |                                                                                                                                                    |   |   |         |           |       |
|--------|----------------------------------------------------------------------------------------------------------------------------------------------------|---|---|---------|-----------|-------|
| B2R4D8 | tr B2R4D8 B2R4D8_HUMAN 60S ribosomal protein L27<br>OS=Homo sapiens OX=9606 PE=2 SV=1                                                              | 4 | 4 | 34.560% | 15769.47  | 10.56 |
| B2R9U2 | tr B2R9U2 B2R9U2_HUMAN Peptidylprolyl isomerase<br>OS=Homo sapiens OX=9606 PE=2 SV=1                                                               | 4 | 4 | 10.890% | 51833.98  | 5.35  |
| B2RMQ4 | tr B2RMQ4 B2RMQ4_HUMAN Cytoskeleton associated protein<br>2 OS=Homo sapiens OX=9606 GN=CKAP2 PE=2 SV=1 CKAP2                                       | 4 | 4 | 6.450%  | 76884.7   | 9.45  |
| B4DV79 | tr B4DV79 B4DV79_HUMAN Eukaryotic translation initiation<br>factor 3 subunit B OS=Homo sapiens OX=9606 GN=EIF3B EIF3B<br>PE=2 SV=1                 | 4 | 4 | 5.420%  | 85133.81  | 5.13  |
| D3DS96 | tr D3DS96 D3DS96_HUMAN Bromodomain adjacent to zinc<br>finger domain, 1A, isoform CRA_c OS=Homo sapiens OX=9606 BAZ1A<br>GN=BAZ1A PE=4 SV=1        | 4 | 4 | 3.340%  | 178571.25 | 6.24  |
| E9PBS1 | tr E9PBS1 E9PBS1_HUMAN AIR carboxylase (Fragment)<br>OS=Homo sapiens OX=9606 GN=PAICS PE=1 SV=1 PAICS                                              | 4 | 4 | 9.930%  | 45651.02  | 6.29  |
| F5GY37 | tr F5GY37 F5GY37_HUMAN Prohibitin OS=Homo sapiens<br>OX=9606 GN=PHB2 PE=1 SV=1 PHB2                                                                | 4 | 4 | 15.360% | 29722.95  | 9.87  |
| H0YFD6 | tr H0YFD6 H0YFD6_HUMAN Enoyl-CoA hydratase OS=Homo<br>sapiens OX=9606 GN=HADHA PE=1 SV=2 HADHA                                                     | 4 | 4 | 5.050%  | 86370.63  | 9.21  |
| H3BN98 | tr H3BN98 H3BN98_HUMAN 40S ribosomal protein S15a<br>(Fragment) OS=Homo sapiens OX=9606 PE=3 SV=2                                                  | 4 | 4 | 14.350% | 27167.94  | 9.6   |
| I3L1P8 | tr I3L1P8 I3L1P8_HUMAN Mitochondrial 2-oxoglutarate/malate<br>carrier protein (Fragment) OS=Homo sapiens OX=9606 SLC25A11<br>GN=SLC25A11 PE=1 SV=1 | 4 | 4 | 15.880% | 32182.07  | 9.79  |
| J3QS96 | tr J3QS96 J3QS96_HUMAN 60S ribosomal protein L17<br>(Fragment) OS=Homo sapiens OX=9606 GN=RPL17 PE=1 RPL17<br>SV=1                                 | 4 | 4 | 30.430% | 15959.33  | 10.53 |
| M0R210 | tr M0R210 M0R210_HUMAN 40S ribosomal protein S16<br>OS=Homo sapiens OX=9606 GN=RPS16 PE=1 SV=1 RPS16                                               | 4 | 4 | 28.680% | 14418.75  | 10.24 |
| Q14222 | tr Q14222 Q14222_HUMAN EEF1A protein (Fragment)<br>OS=Homo sapiens OX=9606 GN=EEF1A PE=2 SV=1 EEF1A                                                | 4 | 4 | 22.030% | 24195.99  | 9.61  |

|            |                                                                                                                                                 |               |   |   |         |           |      |
|------------|-------------------------------------------------------------------------------------------------------------------------------------------------|---------------|---|---|---------|-----------|------|
| Q59GS8     | tr Q59GS8 Q59GS8_HUMAN Complement component 5 variant (Fragment) OS=Homo sapiens OX=9606 PE=2 SV=1                                              |               | 4 | 4 | 3.620%  | 123349.87 | 8.43 |
| Q6N037     | tr Q6N037 Q6N037_HUMAN RNA-binding region (RNP1, RRM) containing 2, isoform CRA_d OS=Homo sapiens OX=9606 DKFZp686A GN=DKFZp686A11192 PE=2 SV=1 |               | 4 | 4 | 10.630% | 39817.91  | 6.12 |
| H0Y115     | tr H0Y115 H0Y115_HUMAN Histone deacetylase 7 (Fragment) OS=Homo sapiens OX=9606 GN=HDAC7 PE=1 SV=1                                              | HDAC7         | 8 | 3 | 85.250% | 5997.6    | 9.45 |
| Q9HAV0     | sp Q9HAV0 GGB4_HUMAN Guanine nucleotide-binding protein subunit beta-4 OS=Homo sapiens OX=9606 GN=GNB4 PE=1 GNB4 SV=3                           |               | 5 | 3 | 6.180%  | 37566.81  | 5.59 |
| S6B291     | tr S6B291 S6B291_HUMAN IgG H chain OS=Homo sapiens OX=9606 PE=1 SV=1                                                                            |               | 5 | 3 | 4.290%  | 50869.92  | 7.89 |
| P43246     | sp P43246 MSH2_HUMAN DNA mismatch repair protein Msh2 OS=Homo sapiens OX=9606 GN=MSH2 PE=1 SV=1                                                 | MSH2          | 4 | 3 | 3.640%  | 104741.87 | 5.58 |
| Q9Y277     | sp Q9Y277 VDAC3_HUMAN Voltage-dependent anion-selective channel protein 3 OS=Homo sapiens OX=9606 VDAC3 GN=VDAC3 PE=1 SV=1                      |               | 4 | 3 | 9.540%  | 30658.3   | 8.84 |
| A0A5C2GKL4 | tr A0A5C2GKL4 A0A5C2GKL4_HUMAN c1658_heavy_IGHV3-7_IGHD2-2_IGHJ6 OS=Homo sapiens OX=9606 PE=2 SV=1                                              | IG (Fragment) | 4 | 3 | 28.350% | 14157.8   | 9.14 |
| K7ERI7     | tr K7ERI7 K7ERI7_HUMAN 60S ribosomal protein L22 OS=Homo sapiens OX=9606 GN=RPL22 PE=1 SV=1                                                     | L22 RPL22     | 4 | 3 | 31.580% | 11168.4   | 6.35 |
| Q65ZC9     | tr Q65ZC9 Q65ZC9_HUMAN Single-chain Fv (Fragment) OS=Homo sapiens OX=9606 GN=scFv PE=2 SV=1                                                     | scFv          | 4 | 3 | 12.080% | 25569.19  | 9.21 |
| O15379     | sp O15379 HDAC3_HUMAN Histone deacetylase 3 OS=Homo sapiens OX=9606 GN=HDAC3 PE=1 SV=2                                                          | HDAC3         | 3 | 3 | 8.180%  | 48847.19  | 4.98 |
| O43491     | sp O43491 E41L2_HUMAN Band 4.1-like protein 2 OS=Homo sapiens OX=9606 GN=EPB41L2 PE=1 SV=1                                                      | EPB41L2       | 3 | 3 | 2.890%  | 112586.72 | 5.34 |
| O43663     | sp O43663 PRC1_HUMAN Protein regulator of cytokinesis 1 OS=Homo sapiens OX=9606 GN=PRC1 PE=1 SV=2                                               | PRC1          | 3 | 3 | 3.390%  | 71605.79  | 6.29 |

|        |                                                                                                                              |   |   |         |           |      |
|--------|------------------------------------------------------------------------------------------------------------------------------|---|---|---------|-----------|------|
| O75534 | sp O75534 CSDE1_HUMAN Cold shock domain-containing protein E1 OS=Homo sapiens OX=9606 GN=CSDE1 PE=1 CSDE1 SV=2               | 3 | 3 | 4.010%  | 88883.64  | 5.88 |
| O94905 | sp O94905 ERLN2_HUMAN Erlin-2 OS=Homo sapiens ERLIN2 OX=9606 GN=ERLIN2 PE=1 SV=1                                             | 3 | 3 | 10.320% | 37839.1   | 5.47 |
| O96008 | sp O96008 TOM40_HUMAN Mitochondrial import receptor subunit TOM40 homolog OS=Homo sapiens OX=9606 TOMM40 GN=TOMM40 PE=1 SV=1 | 3 | 3 | 10.530% | 37892.66  | 6.79 |
| P06744 | sp P06744 G6PI_HUMAN Glucose-6-phosphate isomerase OS=Homo sapiens OX=9606 GN=GPI PE=1 SV=4                                  | 3 | 3 | 5.910%  | 63146.37  | 8.42 |
| P12270 | sp P12270 TPR_HUMAN Nucleoprotein TPR OS=Homo sapiens OX=9606 GN=TPR PE=1 SV=3                                               | 3 | 3 | 1.610%  | 267289.6  | 4.97 |
| P24928 | sp P24928 RPB1_HUMAN DNA-directed RNA polymerase II subunit RPB1 OS=Homo sapiens OX=9606 GN=POLR2A PE=1 POLR2A SV=2          | 3 | 3 | 1.370%  | 217173.69 | 7.02 |
| P27824 | sp P27824 CALX_HUMAN Calnexin OS=Homo sapiens OX=9606 GN=CANX PE=1 SV=2                                                      | 3 | 3 | 6.420%  | 67567.5   | 4.47 |
| P28288 | sp P28288 ABCD3_HUMAN ATP-binding cassette sub-family D member 3 OS=Homo sapiens OX=9606 GN=ABCD3 PE=1 ABCD3 SV=1            | 3 | 3 | 4.400%  | 75475.04  | 9.41 |
| P31939 | sp P31939 PUR9_HUMAN Bifunctional purine biosynthesis protein ATIC OS=Homo sapiens OX=9606 GN=ATIC PE=1 ATIC SV=3            | 3 | 3 | 3.720%  | 64615.11  | 6.27 |
| P45974 | sp P45974 UBP5_HUMAN Ubiquitin carboxyl-terminal hydrolase 5 OS=Homo sapiens OX=9606 GN=USP5 PE=1 USP5 SV=2                  | 3 | 3 | 4.550%  | 95785.21  | 4.91 |
| P49916 | sp P49916 DNLI3_HUMAN DNA ligase 3 OS=Homo sapiens OX=9606 GN=LIG3 PE=1 SV=2                                                 | 3 | 3 | 3.170%  | 112905.67 | 9.17 |
| P50570 | sp P50570 DYN2_HUMAN Dynamin-2 OS=Homo sapiens OX=9606 GN=DNM2 PE=1 SV=2                                                     | 3 | 3 | 2.070%  | 98063.13  | 7.04 |
| P51114 | sp P51114 FXR1_HUMAN Fragile X mental retardation syndrome-related protein 1 OS=Homo sapiens OX=9606 FXR1 GN=FXR1 PE=1 SV=3  | 3 | 3 | 7.090%  | 69719.99  | 5.84 |

|        |                                                                                                                                |         |   |   |         |           |       |
|--------|--------------------------------------------------------------------------------------------------------------------------------|---------|---|---|---------|-----------|-------|
| P51532 | sp P51532 SMCA4_HUMAN Transcription activator BRG1<br>OS=Homo sapiens OX=9606 GN=SMARCA4 PE=1 SV=2                             | SMARCA4 | 3 | 3 | 1.700%  | 184643.49 | 7.83  |
| P52209 | sp P52209 6PGD_HUMAN 6-phosphogluconate<br>dehydrogenase, decarboxylating OS=Homo sapiens OX=9606 PGD<br>GN=PGD PE=1 SV=3      |         | 3 | 3 | 7.870%  | 53139.39  | 6.8   |
| P56545 | sp P56545 CTBP2_HUMAN C-terminal-binding protein 2<br>OS=Homo sapiens OX=9606 GN=CTBP2 PE=1 SV=1                               | CTBP2   | 3 | 3 | 7.640%  | 48944.3   | 6.47  |
| Q09028 | sp Q09028 RBBP4_HUMAN Histone-binding protein<br>OS=Homo sapiens OX=9606 GN=RBBP4 PE=1 SV=3                                    | RBBP4   | 3 | 3 | 8.240%  | 47655.13  | 4.74  |
| Q13409 | sp Q13409 DC112_HUMAN Cytoplasmic dynein 1 intermediate<br>chain 2 OS=Homo sapiens OX=9606 GN=DYNC112 PE=1 SV=3                | DYNC112 | 3 | 3 | 5.170%  | 71455.75  | 5.08  |
| Q14978 | sp Q14978 NOLC1_HUMAN Nucleolar and coiled-body<br>phosphoprotein 1 OS=Homo sapiens OX=9606 GN=NOLC1 NOLC1<br>PE=1 SV=2        |         | 3 | 3 | 5.010%  | 73602.31  | 9.46  |
| Q15717 | sp Q15717 ELAV1_HUMAN ELAV-like protein 1 OS=Homo<br>sapiens OX=9606 GN=ELAVL1 PE=1 SV=2                                       | ELAVL1  | 3 | 3 | 11.660% | 36091.47  | 9.23  |
| Q52LJ0 | sp Q52LJ0 FA98B_HUMAN Protein FAM98B OS=Homo<br>sapiens OX=9606 GN=FAM98B PE=1 SV=2                                            | FAM98B  | 3 | 3 | 8.550%  | 45546.7   | 8.88  |
| Q5T8P6 | sp Q5T8P6 RBM26_HUMAN RNA-binding protein 26<br>OS=Homo sapiens OX=9606 GN=RBM26 PE=1 SV=3                                     | RBM26   | 3 | 3 | 2.580%  | 113595.92 | 9.21  |
| Q6DKI1 | sp Q6DKI1 RL7L_HUMAN 60S ribosomal protein L7-like 1<br>OS=Homo sapiens OX=9606 GN=RPL7L1 PE=1 SV=2                            | RPL7L1  | 3 | 3 | 13.330% | 29668.85  | 10.52 |
| Q6P1J9 | sp Q6P1J9 CDC73_HUMAN Parafibromin OS=Homo sapiens<br>OX=9606 GN=CDC73 PE=1 SV=1                                               | CDC73   | 3 | 3 | 5.840%  | 60575.83  | 9.63  |
| Q86WJ1 | sp Q86WJ1 CHD1L_HUMAN Chromodomain-helicase-DNA-<br>binding protein 1-like OS=Homo sapiens OX=9606 GN=CHD1L CHD1L<br>PE=1 SV=3 |         | 3 | 3 | 3.340%  | 100998.8  | 6.45  |
| Q8IWA0 | sp Q8IWA0 WDR75_HUMAN WD repeat-containing protein 75<br>OS=Homo sapiens OX=9606 GN=WDR75 PE=1 SV=1                            | WDR75   | 3 | 3 | 4.820%  | 94497.7   | 5.65  |



|            |                                                                                                                                    |        |   |   |         |           |      |
|------------|------------------------------------------------------------------------------------------------------------------------------------|--------|---|---|---------|-----------|------|
| Q8IXT5     | sp Q8IXT5 RB12B_HUMAN RNA-binding protein 12B<br>OS=Homo sapiens OX=9606 GN=RBM12B PE=1 SV=2                                       | RBM12B | 3 | 3 | 3.600%  | 118101.34 | 6.34 |
| Q92734     | sp Q92734 TFG_HUMAN Protein TFG OS=Homo sapiens<br>OX=9606 GN=TFG PE=1 SV=2                                                        | TFG    | 3 | 3 | 6.000%  | 43447.42  | 4.94 |
| Q93008     | sp Q93008 USP9X_HUMAN Probable ubiquitin carboxyl-<br>terminal hydrolase FAF-X OS=Homo sapiens OX=9606 USP9X<br>GN=USP9X PE=1 SV=4 | USP9X  | 3 | 3 | 0.940%  | 290459.42 | 5.52 |
| Q96AG4     | sp Q96AG4 LRC59_HUMAN Leucine-rich repeat-containing<br>protein 59 OS=Homo sapiens OX=9606 GN=LRRC59 PE=1 LRRC59<br>SV=1           | LRRC59 | 3 | 3 | 12.700% | 34930.05  | 9.61 |
| Q96S55     | sp Q96S55 WRIP1_HUMAN ATPase WRNIP1 OS=Homo<br>sapiens OX=9606 GN=WRNIP1 PE=1 SV=2                                                 | WRNIP1 | 3 | 3 | 4.960%  | 72132.16  | 5.73 |
| Q9HCG8     | sp Q9HCG8 CWC22_HUMAN Pre-mRNA-splicing factor<br>CWC22 homolog OS=Homo sapiens OX=9606 GN=CWC22 CWC22<br>PE=1 SV=3                | CWC22  | 3 | 3 | 3.080%  | 105465.01 | 6.6  |
| Q9NQS7     | sp Q9NQS7 INCE_HUMAN Inner centromere protein OS=Homo<br>sapiens OX=9606 GN=INCENP PE=1 SV=3                                       | INCENP | 3 | 3 | 3.810%  | 105427.57 | 9.46 |
| Q9UK59     | sp Q9UK59 DBR1_HUMAN Lariat debranching enzyme<br>OS=Homo sapiens OX=9606 GN=DBR1 PE=1 SV=2                                        | DBR1   | 3 | 3 | 6.070%  | 61554.23  | 5.25 |
| Q9UKM9     | sp Q9UKM9 RALY_HUMAN RNA-binding protein Raly<br>OS=Homo sapiens OX=9606 GN=RALY PE=1 SV=1                                         | RALY   | 3 | 3 | 9.800%  | 32462.76  | 9.2  |
| Q9Y5J1     | sp Q9Y5J1 UTP18_HUMAN U3 small nucleolar RNA-<br>associated protein 18 homolog OS=Homo sapiens OX=9606 UTP18<br>GN=UTP18 PE=1 SV=3 | UTP18  | 3 | 3 | 4.860%  | 62002.9   | 8.93 |
| Q9Y5Q9     | sp Q9Y5Q9 TF3C3_HUMAN General transcription factor 3C<br>polypeptide 3 OS=Homo sapiens OX=9606 GN=GTF3C3 PE=1 GTF3C3<br>SV=1       | GTF3C3 | 3 | 3 | 2.930%  | 101271.12 | 4.98 |
| A0A024QZN4 | tr A0A024QZN4 A0A024QZN4_HUMAN Metavinculin<br>OS=Homo sapiens OX=9606 GN=VCL PE=3 SV=1                                            | VCL    | 3 | 3 | 4.130%  | 116721.09 | 5.83 |
| A0A024R0Y5 | tr A0A024R0Y5 A0A024R0Y5_HUMAN ATP-dependent 6-<br>phosphofructokinase OS=Homo sapiens OX=9606 GN=PFKM PFKM<br>PE=2 SV=1           | PFKM   | 3 | 3 | 3.460%  | 85181.59  | 8.23 |

|            |                                                                                                                                           |   |   |         |           |      |
|------------|-------------------------------------------------------------------------------------------------------------------------------------------|---|---|---------|-----------|------|
| A0A024R254 | tr A0A024R254 A0A024R254_HUMAN Melanoma antigen family D, 1, isoform CRA_a OS=Homo sapiens OX=9606 MAGED1 GN=MAGED1 PE=4 SV=1             | 3 | 3 | 3.080%  | 86177.88  | 5.64 |
| A0A024R363 | tr A0A024R363 A0A024R363_HUMAN Chromosome 3 open reading frame 63, isoform CRA_b OS=Homo sapiens OX=9606 C3orf63 GN=C3orf63 PE=4 SV=1     | 3 | 3 | 2.840%  | 140051.67 | 5.44 |
| A0A024R9D2 | tr A0A024R9D2 A0A024R9D2_HUMAN Metadherin, isoform CRA_a OS=Homo sapiens OX=9606 GN=MTDH PE=4 SV=1 MTDH                                   | 3 | 3 | 6.870%  | 63836.17  | 9.33 |
| A0A024R9D3 | tr A0A024R9D3 A0A024R9D3_HUMAN 60S ribosomal protein L30 OS=Homo sapiens OX=9606 GN=RPL30 PE=3 SV=1 RPL30                                 | 3 | 3 | 31.300% | 12783.92  | 9.65 |
| A0A068L529 | tr A0A068L529 A0A068L529_HUMAN TBLR1-RARA fusion protein OS=Homo sapiens OX=9606 GN=TBLR1-RARA fusion TBLR1-RAR PE=2 SV=1                 | 3 | 3 | 5.500%  | 59796.45  | 6.07 |
| A0A090N8Y2 | tr A0A090N8Y2 A0A090N8Y2_HUMAN Protein disulfide-isomerase A4 OS=Homo sapiens OX=9606 GN=ERP70 PE=2 SV=1 ERP70                            | 3 | 3 | 4.340%  | 72931.58  | 4.96 |
| A0A0A0MRW6 | tr A0A0A0MRW6 A0A0A0MRW6_HUMAN Nucleolar protein 6 OS=Homo sapiens OX=9606 GN=NOL6 PE=1 SV=1 NOL6                                         | 3 | 3 | 3.570%  | 112155.9  | 7.4  |
| A0A0C4DG17 | tr A0A0C4DG17 A0A0C4DG17_HUMAN 40S ribosomal protein SA OS=Homo sapiens OX=9606 GN=RPSA PE=1 SV=1 RPSA                                    | 3 | 3 | 12.670% | 33313.24  | 4.79 |
| A0A0C4DG98 | tr A0A0C4DG98 A0A0C4DG98_HUMAN THO complex subunit 2 OS=Homo sapiens OX=9606 GN=THOC2 PE=1 SV=1 THOC2                                     | 3 | 3 | 1.960%  | 169579.72 | 8.85 |
| A0A0S2Z404 | tr A0A0S2Z404 A0A0S2Z404_HUMAN Regulator of chromosome condensation 1 isoform 2 (Fragment) OS=Homo sapiens OX=9606 GN=RCC1 PE=2 SV=1 RCC1 | 3 | 3 | 6.640%  | 48145.04  | 8.44 |
| A0A0S2Z4R1 | tr A0A0S2Z4R1 A0A0S2Z4R1_HUMAN Tyrosine--tRNA ligase (Fragment) OS=Homo sapiens OX=9606 GN=YARS PE=2 SV=1 YARS                            | 3 | 3 | 5.680%  | 59142.76  | 6.61 |
| A0A140VJF3 | tr A0A140VJF3 A0A140VJF3_HUMAN Testicular tissue protein Li 27 OS=Homo sapiens OX=9606 PE=2 SV=1                                          | 3 | 3 | 8.590%  | 36954.1   | 6.37 |
| A0A140VJS9 | tr A0A140VJS9 A0A140VJS9_HUMAN Serine/threonine-protein phosphatase OS=Homo sapiens OX=9606 PE=2 SV=1                                     | 3 | 3 | 10.850% | 38630.97  | 6.2  |

|            |                                                                                                                                             |   |   |         |           |       |
|------------|---------------------------------------------------------------------------------------------------------------------------------------------|---|---|---------|-----------|-------|
| A0A140VK53 | tr A0A140VK53 A0A140VK53_HUMAN Testicular secretory protein Li 53 OS=Homo sapiens OX=9606 PE=2 SV=1                                         | 3 | 3 | 1.340%  | 299611.6  | 12.05 |
| A0A1U9X7X5 | tr A0A1U9X7X5 A0A1U9X7X5_HUMAN Kinesin-like protein OS=Homo sapiens OX=9606 PE=3 SV=1                                                       | 3 | 3 | 5.790%  | 73774.8   | 9.15  |
| A0A1Y0BRN3 | tr A0A1Y0BRN3 A0A1Y0BRN3_HUMAN Unconventional myosin-6 OS=Homo sapiens OX=9606 GN=MYO6 PE=1 SV=1 MYO6                                       | 3 | 3 | 2.880%  | 148602.19 | 8.74  |
| A0A2R8Y849 | tr A0A2R8Y849 A0A2R8Y849_HUMAN 40S ribosomal protein S24 OS=Homo sapiens OX=9606 GN=RPS24 PE=1 SV=1 RPS24                                   | 3 | 3 | 19.850% | 15196.79  | 10.91 |
| A0A3Q8B022 | tr A0A3Q8B022 A0A3Q8B022_HUMAN Protein arginine N-methyltransferase 1 transcript variant 6 OS=Homo sapiens OX=9606 GN=PRMT1 PE=2 SV=1 PRMT1 | 3 | 3 | 10.600% | 39967.25  | 5.04  |
| A0A494C189 | tr A0A494C189 A0A494C189_HUMAN Histone H2A OS=Homo sapiens OX=9606 GN=H2AZ1 PE=1 SV=1 H2AZ1                                                 | 3 | 3 | 20.470% | 13495.51  | 10.58 |
| A0A5F9ZHL1 | tr A0A5F9ZHL1 A0A5F9ZHL1_HUMAN Acetyl-CoA acetyltransferase, mitochondrial OS=Homo sapiens OX=9606 GN=ACAT1 PE=1 SV=1 ACAT1                 | 3 | 3 | 8.760%  | 46108.17  | 9.1   |
| A0A7I2YQI6 | tr A0A7I2YQI6 A0A7I2YQI6_HUMAN Eukaryotic translation initiation factor 3 subunit I OS=Homo sapiens OX=9606 GN=EIF3I PE=1 SV=1 EIF3I        | 3 | 3 | 6.140%  | 44900.18  | 9.04  |
| A0A7P0T9C0 | tr A0A7P0T9C0 A0A7P0T9C0_HUMAN Transportin-1 OS=Homo sapiens OX=9606 GN=TNPO1 PE=1 SV=1 TNPO1                                               | 3 | 3 | 3.140%  | 90651.54  | 4.78  |
| A0A804HK61 | tr A0A804HK61 A0A804HK61_HUMAN Alpha-actinin-1 OS=Homo sapiens OX=9606 GN=ACTN1 PE=4 SV=1 ACTN1                                             | 3 | 3 | 3.500%  | 102580.07 | 5.3   |
| A1L4G8     | tr A1L4G8 A1L4G8_HUMAN C18orf34 protein OS=Homo sapiens OX=9606 GN=C18orf34 PE=2 SV=1 C18orf34                                              | 3 | 3 | 2.540%  | 102038.93 | 6.34  |
| A8K946     | tr A8K946 A8K946_HUMAN mRNA cap guanine-N7 methyltransferase OS=Homo sapiens OX=9606 PE=2 SV=1                                              | 3 | 3 | 8.130%  | 57749.96  | 7.82  |
| B0UZZ8     | tr B0UZZ8 B0UZZ8_HUMAN Chromosome 6 open reading frame 11 OS=Homo sapiens OX=9606 GN=C6orf11 PE=2 SV=1 C6orf11                              | 3 | 3 | 5.570%  | 68040.25  | 9.69  |

|        |                                                                                                                                                      |   |   |         |           |       |
|--------|------------------------------------------------------------------------------------------------------------------------------------------------------|---|---|---------|-----------|-------|
| B2R6D0 | tr B2R6D0 B2R6D0_HUMAN 26S proteasome non-ATPase regulatory subunit 1 OS=Homo sapiens OX=9606 PE=2 SV=1                                              | 3 | 3 | 3.880%  | 105837.06 | 5.25  |
| B2R858 | tr B2R858 B2R858_HUMAN RNA helicase OS=Homo sapiens OX=9606 PE=2 SV=1                                                                                | 3 | 3 | 7.420%  | 53215.83  | 8.85  |
| B2RAM6 | tr B2RAM6 B2RAM6_HUMAN cDNA, FLJ95005, highly similar to Homo sapiens kinesin family member 11 (KIF11), mRNA OS=Homo sapiens OX=9606 PE=2 SV=1       | 3 | 3 | 2.750%  | 119130.59 | 5.52  |
| B2RNR6 | tr B2RNR6 B2RNR6_HUMAN Zinc finger RNA binding protein OS=Homo sapiens OX=9606 GN=ZFR PE=2 SV=1                                                      | 3 | 3 | 3.540%  | 117012.74 | 9.17  |
| B3KM65 | tr B3KM65 B3KM65_HUMAN RNA helicase OS=Homo sapiens OX=9606 PE=2 SV=1                                                                                | 3 | 3 | 8.230%  | 46138.32  | 9.69  |
| B3KRR1 | tr B3KRR1 B3KRR1_HUMAN cDNA FLJ34725 fis, clone MESAN2005958, highly similar to RNA-binding protein Luc7-like 2 OS=Homo sapiens OX=9606 PE=2 SV=1    | 3 | 3 | 7.080%  | 40490.59  | 10.15 |
| B3KXZ4 | tr B3KXZ4 B3KXZ4_HUMAN DNA replication licensing factor MCM2 OS=Homo sapiens OX=9606 PE=2 SV=1                                                       | 3 | 3 | 4.210%  | 91270.8   | 6.05  |
| B3KY60 | tr B3KY60 B3KY60_HUMAN cDNA FLJ16777 fis, clone BRHIP2029567, highly similar to Cell division cycle 5-like protein OS=Homo sapiens OX=9606 PE=2 SV=1 | 3 | 3 | 3.870%  | 92275.64  | 8.22  |
| B4DES6 | tr B4DES6 B4DES6_HUMAN cDNA FLJ52441, highly similar to Zinc finger protein 512 OS=Homo sapiens OX=9606 PE=2 SV=1                                    | 3 | 3 | 9.090%  | 53120.64  | 9.66  |
| B4DHJ3 | tr B4DHJ3 B4DHJ3_HUMAN DNA-directed RNA polymerase subunit beta OS=Homo sapiens OX=9606 PE=2 SV=1                                                    | 3 | 3 | 3.260%  | 133025.28 | 6.86  |
| B4DI38 | tr B4DI38 B4DI38_HUMAN Adenylyl cyclase-associated protein 1 OS=Homo sapiens OX=9606 PE=2 SV=1                                                       | 3 | 3 | 10.840% | 49079.53  | 8.34  |
| B4DI57 | tr B4DI57 B4DI57_HUMAN cDNA FLJ54111, highly similar to Serotransferrin OS=Homo sapiens OX=9606 PE=2 SV=1                                            | 3 | 3 | 3.330%  | 63436.49  | 6.95  |
| B4DLV7 | tr B4DLV7 B4DLV7_HUMAN Rab GDP dissociation inhibitor OS=Homo sapiens OX=9606 PE=2 SV=1                                                              | 3 | 3 | 7.130%  | 51153.36  | 8.37  |

|        |                                                                                                                                       |   |   |         |           |       |
|--------|---------------------------------------------------------------------------------------------------------------------------------------|---|---|---------|-----------|-------|
| B4DX55 | tr B4DX55 B4DX55_HUMAN cDNA FLJ58171, moderately similar to Melanoma-associated antigen D2 OS=Homo sapiens OX=9606 PE=2 SV=1          | 3 | 3 | 5.190%  | 55499.7   | 5.75  |
| B7Z5C1 | tr B7Z5C1 B7Z5C1_HUMAN cDNA FLJ56126, highly similar to Programmed cell death 6-interacting protein OS=Homo sapiens OX=9606 PE=2 SV=1 | 3 | 3 | 4.310%  | 71818.63  | 6.04  |
| B7Z766 | tr B7Z766 B7Z766_HUMAN cDNA FLJ54564, highly similar to 150 kDa oxygen-regulated protein (Orp150) OS=Homo sapiens OX=9606 PE=2 SV=1   | 3 | 3 | 2.830%  | 94198.34  | 4.96  |
| D6R9I9 | tr D6R9I9 D6R9I9_HUMAN ATP-binding cassette sub-family E member 1 OS=Homo sapiens OX=9606 GN=ABCE1 PE=1 ABCE1 SV=1                    | 3 | 3 | 5.940%  | 47036.5   | 8.63  |
| E7ERM3 | tr E7ERM3 E7ERM3_HUMAN Angiomotin OS=Homo sapiens OX=9606 GN=AMOT PE=1 SV=1 AMOT                                                      | 3 | 3 | 2.700%  | 92502.99  | 7     |
| E9PFW3 | tr E9PFW3 E9PFW3_HUMAN AP-2 complex subunit mu OS=Homo sapiens OX=9606 GN=AP2M1 PE=1 SV=1 AP2M1                                       | 3 | 3 | 4.780%  | 52302.9   | 9.53  |
| E9PKF6 | tr E9PKF6 E9PKF6_HUMAN Serine/threonine-protein phosphatase 6 regulatory subunit 3 OS=Homo sapiens OX=9606 GN=PPP6R3 PE=1 SV=1 PPP6R3 | 3 | 3 | 3.700%  | 93731.97  | 4.52  |
| G1UI21 | tr G1UI21 G1UI21_HUMAN Talin-2 OS=Homo sapiens OX=9606 GN=TLN2 PE=2 SV=1 TLN2                                                         | 3 | 3 | 1.200%  | 166575.87 | 5.18  |
| G3V3B0 | tr G3V3B0 G3V3B0_HUMAN Apoptotic chromatin condensation inducer in the nucleus OS=Homo sapiens OX=9606 GN=ACIN1 ACIN1 PE=1 SV=1       | 3 | 3 | 5.840%  | 67493.93  | 7.22  |
| G3V5Z7 | tr G3V5Z7 G3V5Z7_HUMAN Proteasome subunit alpha type OS=Homo sapiens OX=9606 GN=PSMA6 PE=1 SV=1 PSMA6                                 | 3 | 3 | 13.890% | 28147.01  | 6.35  |
| H3BPZ1 | tr H3BPZ1 H3BPZ1_HUMAN Very-long-chain (3R)-3-hydroxyacyl-CoA dehydratase OS=Homo sapiens OX=9606 GN=HACD3 PE=1 SV=1 HACD3            | 3 | 3 | 9.790%  | 40068.53  | 9.06  |
| H7C2L4 | tr H7C2L4 H7C2L4_HUMAN Transformer-2 protein homolog beta (Fragment) OS=Homo sapiens OX=9606 GN=TRA2B TRA2B PE=1 SV=1                 | 3 | 3 | 25.230% | 12547.53  | 10.51 |
| Q53F90 | tr Q53F90 Q53F90_HUMAN Glutamine amidotransferase (Fragment) OS=Homo sapiens OX=9606 PE=2 SV=1                                        | 3 | 3 | 4.180%  | 76695.47  | 6.24  |

|        |                                                                                                                         |   |   |         |           |       |
|--------|-------------------------------------------------------------------------------------------------------------------------|---|---|---------|-----------|-------|
| Q53GG0 | tr Q53GG0 Q53GG0_HUMAN Epithelial protein lost in neoplasm beta variant (Fragment) OS=Homo sapiens OX=9606 PE=2 SV=1    | 3 | 3 | 5.010%  | 85252.61  | 6.41  |
| Q53HC3 | tr Q53HC3 Q53HC3_HUMAN Phosphate carrier protein, mitochondrial (Fragment) OS=Homo sapiens OX=9606 PE=2 SV=1            | 3 | 3 | 6.930%  | 39928.23  | 9.43  |
| Q562Z4 | tr Q562Z4 Q562Z4_HUMAN Actin-like protein (Fragment) OS=Homo sapiens OX=9606 GN=ACT PE=4 SV=1 ACT                       | 3 | 3 | 52.430% | 11555.22  | 7.1   |
| Q59G73 | tr Q59G73 Q59G73_HUMAN Exosome component 10 isoform 2 variant (Fragment) OS=Homo sapiens OX=9606 PE=2 SV=1              | 3 | 3 | 11.140% | 49221.36  | 5.79  |
| Q59GE4 | tr Q59GE4 Q59GE4_HUMAN Ribosomal protein S10 variant (Fragment) OS=Homo sapiens OX=9606 PE=3 SV=1                       | 3 | 3 | 13.790% | 19859.65  | 9.92  |
| Q5JR04 | tr Q5JR04 Q5JR04_HUMAN RNA helicase OS=Homo sapiens OX=9606 GN=MOV10 PE=1 SV=1 MOV10                                    | 3 | 3 | 2.850%  | 107208.6  | 8.97  |
| Q5T5C7 | tr Q5T5C7 Q5T5C7_HUMAN Seryl-tRNA synthetase OS=Homo sapiens OX=9606 GN=SARS1 PE=1 SV=1 SARS1                           | 3 | 3 | 6.340%  | 61312.49  | 6.64  |
| Q5TCT4 | tr Q5TCT4 Q5TCT4_HUMAN RNA-binding protein 34 (Fragment) OS=Homo sapiens OX=9606 GN=RBM34 PE=1 SV=1 RBM34               | 3 | 3 | 16.590% | 24079.02  | 9.55  |
| Q5TFJ7 | tr Q5TFJ7 Q5TFJ7_HUMAN Importin subunit alpha-7 (Fragment) OS=Homo sapiens OX=9606 GN=KPNA6 PE=1 SV=1 KPNA6             | 3 | 3 | 8.720%  | 35457.42  | 5.3   |
| Q5VU21 | tr Q5VU21 Q5VU21_HUMAN PAI-1 mRNA-binding protein variant OS=Homo sapiens OX=9606 PE=2 SV=1                             | 3 | 3 | 9.300%  | 42426.12  | 8.43  |
| Q5VVD0 | tr Q5VVD0 Q5VVD0_HUMAN 60S ribosomal protein L11 OS=Homo sapiens OX=9606 GN=RPL11 PE=2 SV=1 RPL11                       | 3 | 3 | 16.850% | 20252.15  | 9.64  |
| Q6AHZ7 | tr Q6AHZ7 Q6AHZ7_HUMAN Uncharacterized protein DKFZp686A111 OS=Homo sapiens OX=9606 GN=DKFZp686A111 PE=2 SV=1 DKFZp686A | 3 | 3 | 1.280%  | 238798.05 | 7.11  |
| Q6IPI1 | tr Q6IPI1 Q6IPI1_HUMAN 60S ribosomal protein L29 OS=Homo sapiens OX=9606 GN=RPL29 PE=2 SV=1 RPL29                       | 3 | 3 | 18.010% | 17951.11  | 11.67 |

|            |                                                                                                                                                                     |                    |   |   |         |           |       |
|------------|---------------------------------------------------------------------------------------------------------------------------------------------------------------------|--------------------|---|---|---------|-----------|-------|
| Q86Y65     | tr Q86Y65 Q86Y65_HUMAN KIAA1529 protein (Fragment)<br>OS=Homo sapiens OX=9606 GN=KIAA1529 PE=2 SV=2                                                                 | KIAA1529           | 3 | 3 | 1.890%  | 104486.04 | 5.19  |
| Q9BSP4     | tr Q9BSP4 Q9BSP4_HUMAN PFKL protein (Fragment)<br>OS=Homo sapiens OX=9606 GN=PFKL PE=2 SV=2                                                                         | PFKL               | 3 | 3 | 5.970%  | 53646.16  | 8.58  |
| R4GMQ1     | tr R4GMQ1 R4GMQ1_HUMAN Lysine-specific histone<br>demethylase OS=Homo sapiens OX=9606 GN=KDM1A PE=1 KDM1A<br>SV=2                                                   |                    | 3 | 3 | 3.730%  | 93596.36  | 6.11  |
| R4GMU7     | tr R4GMU7 R4GMU7_HUMAN 60S ribosomal protein L7-like 1<br>(Fragment) OS=Homo sapiens OX=9606 GN=RPL7L1 PE=1 RPL7L1<br>SV=2                                          |                    | 3 | 3 | 12.120% | 22873.98  | 10.64 |
| V9HW21     | tr V9HW21 V9HW21_HUMAN Carbonic anhydrase OS=Homo<br>sapiens OX=9606 GN=HEL-76 PE=2 SV=1                                                                            | HEL-76             | 3 | 3 | 18.080% | 29245.67  | 6.87  |
| V9HWF5     | tr V9HWF5 V9HWF5_HUMAN Peptidyl-prolyl cis-trans<br>isomerase OS=Homo sapiens OX=9606 GN=HEL-S-69p PE=1 HEL-S-69p<br>SV=1                                           |                    | 3 | 3 | 15.150% | 18012.3   | 7.68  |
| P52926     | sp P52926 ZC3HF_HUMAN High mobility group protein HMGI-<br>C OS=Homo sapiens OX=9606 GN=HMGA2 PE=1 SV=1                                                             | HMGA2              | 3 | 3 | 37.610% | 11831.91  | 10.63 |
| Q53T94     | sp Q53T94 TAF1B_HUMAN TATA box-binding protein-<br>associated factor RNA polymerase I subunit B OS=Homo<br>sapiens OX=9606 GN=TAF1B PE=1 SV=1                       | TAF1B              | 4 | 2 | 1.700%  | 68831.01  | 8.27  |
| A0A2U8J8D6 | tr A0A2U8J8D6 A0A2U8J8D6_HUMAN Ig heavy chain variable<br>region (Fragment) OS=Homo sapiens OX=9606 GN=IgH PE=2 IgH<br>SV=1                                         |                    | 4 | 2 | 22.640% | 11840.06  | 6.75  |
| A0A5C2GAS0 | tr A0A5C2GAS0 A0A5C2GAS0_HUMAN IGH + IGL<br>c356_heavy_IGHV3-20_IGHD3-22_IGHJ5 (Fragment)<br>OS=Homo sapiens OX=9606 PE=2 SV=1                                      |                    | 4 | 2 | 16.670% | 13133.48  | 8.06  |
| B2R9I9     | tr B2R9I9 B2R9I9_HUMAN cDNA, FLJ94417, highly similar to<br>Homo sapiens WD repeat domain 57 (U5 snRNP specific)<br>(WDR57), mRNA OS=Homo sapiens OX=9606 PE=2 SV=1 |                    | 4 | 2 | 2.800%  | 39266.08  | 8.69  |
| P63173     | sp P63173 RL38_HUMAN 60S ribosomal protein L38<br>OS=Homo sapiens OX=9606 GN=RPL38 PE=1 SV=2                                                                        | RPL38              | 3 | 2 | 35.710% | 8217.79   | 10.1  |
| Q9H4L4     | sp Q9H4L4 SENP3_HUMAN Sentrin-specific protease<br>OS=Homo sapiens OX=9606 GN=SENP3 PE=1 SV=2                                                                       | <sup>3</sup> SENP3 | 3 | 2 | 1.220%  | 65009.07  | 8.82  |

|            |                                                                                                                                                 |            |   |   |         |           |      |
|------------|-------------------------------------------------------------------------------------------------------------------------------------------------|------------|---|---|---------|-----------|------|
| A0A0A0MRJ3 | tr A0A0A0MRJ3 A0A0A0MRJ3_HUMAN Neuron navigator 1<br>OS=Homo sapiens OX=9606 GN=NAV1 PE=1 SV=1                                                  | NAV1       | 3 | 2 | 0.550%  | 197403    | 8.37 |
| A0A0A0MTQ8 | tr A0A0A0MTQ8 A0A0A0MTQ8_HUMAN Coiled-coil domain-<br>containing protein 175 OS=Homo sapiens OX=9606 CCDC175<br>GN=CCDC175 PE=1 SV=1            |            | 3 | 2 | 2.290%  | 97412.64  | 5.79 |
| A0A5C2G5V9 | tr A0A5C2G5V9 A0A5C2G5V9_HUMAN IGH<br>c356_heavy_IGHV3-43_IGHD3-9_IGHJ3<br>OS=Homo sapiens OX=9606 PE=2 SV=1                                    | (Fragment) | 3 | 2 | 20.170% | 12806.2   | 5.14 |
| A0A5C2G9S1 | tr A0A5C2G9S1 A0A5C2G9S1_HUMAN IGH + IGL<br>c463_heavy_IGHV3-11_IGHD3-3_IGHJ5<br>OS=Homo sapiens OX=9606 PE=2 SV=1                              | (Fragment) | 3 | 2 | 12.800% | 13767.2   | 6.34 |
| A0A5C2GFE8 | tr A0A5C2GFE8 A0A5C2GFE8_HUMAN IG<br>c282_heavy_IGHV3-23_IGHD3-22_IGHJ4<br>OS=Homo sapiens OX=9606 PE=2 SV=1                                    | (Fragment) | 3 | 2 | 12.700% | 13614.16  | 5.54 |
| A0A5C2GH44 | tr A0A5C2GH44 A0A5C2GH44_HUMAN IG<br>c518_heavy_IGHV3-30_IGHD3-10_IGHJ4<br>OS=Homo sapiens OX=9606 PE=2 SV=1                                    | (Fragment) | 3 | 2 | 20.770% | 14354.88  | 7.95 |
| A0A5C2GQU8 | tr A0A5C2GQU8 A0A5C2GQU8_HUMAN IG<br>c1712_heavy_IGHV3-23_IGHD4-11_IGHJ4<br>OS=Homo sapiens OX=9606 PE=2 SV=1                                   | (Fragment) | 3 | 2 | 20.170% | 12645.83  | 6.46 |
| A0A5C2GXJ3 | tr A0A5C2GXJ3 A0A5C2GXJ3_HUMAN IG<br>c1327_heavy_IGHV3-9_IGHD2-2_IGHJ4<br>OS=Homo sapiens OX=9606 PE=2 SV=1                                     | (Fragment) | 3 | 2 | 16.530% | 13191.59  | 5.73 |
| A0A7I2V497 | tr A0A7I2V497 A0A7I2V497_HUMAN Heterogeneous nuclear<br>ribonucleoprotein A1 (Fragment) OS=Homo sapiens OX=9606 HNRNPA1<br>GN=HNRNPA1 PE=1 SV=1 |            | 3 | 2 | 78.130% | 3135.28   | 11   |
| A8MV53     | tr A8MV53 A8MV53_HUMAN HCG2033702, isoform CRA_a<br>OS=Homo sapiens OX=9606 GN=PPAN PE=1 SV=1                                                   | PPAN       | 3 | 2 | 5.710%  | 47144.48  | 9.86 |
| B4DYY5     | tr B4DYY5 B4DYY5_HUMAN cDNA FLJ55671, highly similar to<br>Ubiquitin-associated protein 2-like OS=Homo sapiens OX=9606<br>PE=2 SV=1             |            | 3 | 2 | 2.230%  | 113558.36 | 6.2  |
| M0R2N5     | tr M0R2N5 M0R2N5_HUMAN Very-long-chain enoyl-CoA<br>reductase OS=Homo sapiens OX=9606 GN=TECR PE=1 SV=1                                         | TECR       | 3 | 2 | 4.910%  | 39966.69  | 9.65 |
| Q68DJ3     | tr Q68DJ3 Q68DJ3_HUMAN Uncharacterized protein<br>DKFZp781A0653 OS=Homo sapiens OX=9606 DKFZp781A<br>GN=DKFZp781A0653 PE=2 SV=1                 |            | 3 | 2 | 2.120%  | 54206.48  | 7.01 |



|            |                                                                                                                                         |           |   |   |         |           |      |
|------------|-----------------------------------------------------------------------------------------------------------------------------------------|-----------|---|---|---------|-----------|------|
| Q8IWY7     | tr Q8IWY7 Q8IWY7_HUMAN Tau-tubulin kinase OS=Homo sapiens OX=9606 GN=TTBK2 PE=1 SV=1                                                    | TTBK2     | 3 | 2 | 0.790%  | 182464.91 | 6.58 |
| A0A075B6R9 | sp A0A075B6R9 KVD24_HUMAN Probable non-functional immunoglobulin kappa variable 2D-24 OS=Homo sapiens OX=9606 GN=IGKV2D-24 PE=1 SV=1    | IGKV2D-24 | 2 | 2 | 10.000% | 13078.78  | 8.98 |
| O00411     | sp O00411 RPOM_HUMAN DNA-directed RNA polymerase, mitochondrial OS=Homo sapiens OX=9606 GN=POLRMT PE=1 SV=2                             | POLRMT    | 2 | 2 | 1.300%  | 138618.81 | 9.19 |
| O43660     | sp O43660 PLRG1_HUMAN Pleiotropic regulator 1 OS=Homo sapiens OX=9606 GN=PLRG1 PE=1 SV=1                                                | PLRG1     | 2 | 2 | 3.700%  | 57193.17  | 9.24 |
| O43719     | sp O43719 HTSF1_HUMAN HIV Tat-specific factor 1 OS=Homo sapiens OX=9606 GN=HTATSF1 PE=1 SV=1                                            | HTATSF1   | 2 | 2 | 1.850%  | 85851.81  | 4.29 |
| O60524     | sp O60524 NEMF_HUMAN Nuclear export mediator factor NEMF OS=Homo sapiens OX=9606 GN=NEMF PE=1 SV=4                                      | NEMF      | 2 | 2 | 1.580%  | 122952.96 | 5.97 |
| O75037     | sp O75037 KIF21B_HUMAN Kinesin-like protein KIF21B OS=Homo sapiens OX=9606 GN=KIF21B PE=1 SV=2                                          | KIF21B    | 2 | 2 | 0.670%  | 182659.61 | 6.7  |
| O75179     | sp O75179 ANKR17_HUMAN Ankyrin repeat domain-containing protein 17 OS=Homo sapiens OX=9606 GN=ANKRD17 PE=1 SV=3                         | ANKRD17   | 2 | 2 | 0.650%  | 274254.81 | 6.07 |
| O75475     | sp O75475 PSIP1_HUMAN PC4 and SFRS1-interacting protein OS=Homo sapiens OX=9606 GN=PSIP1 PE=1 SV=1                                      | PSIP1     | 2 | 2 | 3.580%  | 60102.54  | 9.15 |
| O95602     | sp O95602 RPA1_HUMAN DNA-directed RNA polymerase I subunit RPA1 OS=Homo sapiens OX=9606 GN=POLR1A PE=1 SV=2                             | POLR1A    | 2 | 2 | 1.340%  | 194809.02 | 6.61 |
| O95793     | sp O95793 STAU1_HUMAN Double-stranded RNA-binding protein Staufen homolog 1 OS=Homo sapiens OX=9606 GN=STAU1 PE=1 SV=2                  | STAU1     | 2 | 2 | 3.470%  | 63181.55  | 9.46 |
| P04844     | sp P04844 RPN2_HUMAN Dolichyl-diphosphooligosaccharide--protein glycosyltransferase subunit 2 OS=Homo sapiens OX=9606 GN=RPN2 PE=1 SV=3 | RPN2      | 2 | 2 | 5.710%  | 69283.12  | 5.44 |
| P09972     | sp P09972 ALDOC_HUMAN Fructose-bisphosphate aldolase C OS=Homo sapiens OX=9606 GN=ALDOC PE=1 SV=2                                       | ALDOC     | 2 | 2 | 8.240%  | 39455.4   | 6.41 |

|        |                                                                                                                                                |       |   |   |         |           |      |
|--------|------------------------------------------------------------------------------------------------------------------------------------------------|-------|---|---|---------|-----------|------|
| P10155 | sp P10155 RO60_HUMAN 60 kDa SS-A/Ro ribonucleoprotein<br>OS=Homo sapiens OX=9606 GN=RO60 PE=1 SV=2                                             | RO60  | 2 | 2 | 3.350%  | 60669.98  | 8.27 |
| P15121 | sp P15121 ALDR_HUMAN Aldo-keto reductase family 1<br>member B1 OS=Homo sapiens OX=9606 GN=AKR1B1 PE=1 AKR1B1<br>SV=3                           |       | 2 | 2 | 4.750%  | 35852.98  | 6.52 |
| P15170 | sp P15170 ERF3A_HUMAN Eukaryotic peptide chain release<br>factor GTP-binding subunit ERF3A OS=Homo sapiens OX=9606 GSPT1<br>GN=GSPT1 PE=1 SV=1 |       | 2 | 2 | 4.010%  | 55755.3   | 5.45 |
| P21108 | sp P21108 PRPS3_HUMAN Ribose-phosphate<br>pyrophosphokinase 3 OS=Homo sapiens OX=9606 PRPS1L1<br>GN=PRPS1L1 PE=1 SV=2                          |       | 2 | 2 | 7.550%  | 34838.95  | 5.92 |
| P28074 | sp P28074 PSB5_HUMAN Proteasome subunit beta type-5<br>OS=Homo sapiens OX=9606 GN=PSMB5 PE=1 SV=3                                              | PSMB5 | 2 | 2 | 7.980%  | 28479.95  | 6.44 |
| P30101 | sp P30101 PDIA3_HUMAN Protein disulfide-isomerase A3<br>OS=Homo sapiens OX=9606 GN=PDIA3 PE=1 SV=4                                             | PDIA3 | 2 | 2 | 4.360%  | 56781.7   | 5.98 |
| P35251 | sp P35251 RFC1_HUMAN Replication factor C subunit 1<br>OS=Homo sapiens OX=9606 GN=RFC1 PE=1 SV=4                                               | RFC1  | 2 | 2 | 1.740%  | 128253.08 | 9.38 |
| P35520 | sp P35520 CBS_HUMAN Cystathionine beta-synthase<br>OS=Homo sapiens OX=9606 GN=CBS PE=1 SV=2                                                    | CBS   | 2 | 2 | 2.180%  | 60585.85  | 6.2  |
| P46459 | sp P46459 NSF_HUMAN Vesicle-fusing ATPase OS=Homo<br>sapiens OX=9606 GN=NSF PE=1 SV=3                                                          | NSF   | 2 | 2 | 2.280%  | 82593.4   | 6.52 |
| P49454 | sp P49454 CENPF_HUMAN Centromere protein F OS=Homo<br>sapiens OX=9606 GN=CENPF PE=1 SV=3                                                       | CENPF | 2 | 2 | 0.420%  | 357523.05 | 5.06 |
| P52434 | sp P52434 RPAB3_HUMAN DNA-directed RNA polymerases I,<br>II, and III subunit RPABC3 OS=Homo sapiens OX=9606 POLR2H<br>GN=POLR2H PE=1 SV=4      |       | 2 | 2 | 16.670% | 17143.1   | 4.5  |
| P53618 | sp P53618 COPB_HUMAN Coatomer subunit beta OS=Homo<br>sapiens OX=9606 GN=COPB1 PE=1 SV=3                                                       | COPB1 | 2 | 2 | 1.780%  | 107141.04 | 5.72 |
| P58107 | sp P58107 EPIPL_HUMAN Epiplakin OS=Homo sapiens<br>OX=9606 GN=EPPK1 PE=1 SV=3                                                                  | EPPK1 | 2 | 2 | 0.690%  | 555651.44 | 5.45 |

|        |                                                                                                                     |        |   |   |         |           |       |
|--------|---------------------------------------------------------------------------------------------------------------------|--------|---|---|---------|-----------|-------|
| P61160 | sp P61160 ARP2_HUMAN Actin-related protein 2 OS=Homo sapiens OX=9606 GN=ACTR2 PE=1 SV=1                             | ACTR2  | 2 | 2 | 3.050%  | 44760.27  | 6.29  |
| P62854 | sp P62854 RS26_HUMAN 40S ribosomal protein S26 OS=Homo sapiens OX=9606 GN=RPS26 PE=1 SV=3                           | RPS26  | 2 | 2 | 18.260% | 13015.29  | 11.01 |
| Q06265 | sp Q06265 EXOS9_HUMAN Exosome complex component RRP45 OS=Homo sapiens OX=9606 GN=EXOSC9 PE=1 SV=3                   | EXOSC9 | 2 | 2 | 5.010%  | 48948.49  | 5.19  |
| Q09161 | sp Q09161 NCBP1_HUMAN Nuclear cap-binding protein subunit 1 OS=Homo sapiens OX=9606 GN=NCBP1 PE=1 SV=1              | NCBP1  | 2 | 2 | 2.780%  | 91838.39  | 5.99  |
| Q13045 | sp Q13045 FLII_HUMAN Protein flightless-1 homolog OS=Homo sapiens OX=9606 GN=FLII PE=1 SV=2                         | FLII   | 2 | 2 | 1.340%  | 144749.47 | 5.75  |
| Q13162 | sp Q13162 PRDX4_HUMAN Peroxiredoxin-4 OS=Homo sapiens OX=9606 GN=PRDX4 PE=1 SV=1                                    | PRDX4  | 2 | 2 | 8.860%  | 30539.52  | 5.86  |
| Q13257 | sp Q13257 MD2L1_HUMAN Mitotic spindle assembly checkpoint protein MAD2A OS=Homo sapiens OX=9606 GN=MAD2L1 PE=1 SV=1 | MAD2L1 | 2 | 2 | 6.340%  | 23509.66  | 5.02  |
| Q13415 | sp Q13415 ORC1_HUMAN Origin recognition complex subunit 1 OS=Homo sapiens OX=9606 GN=ORC1 PE=1 SV=2                 | ORC1   | 2 | 2 | 1.280%  | 97348.59  | 9.34  |
| Q13523 | sp Q13523 PRP4B_HUMAN Serine/threonine-protein kinase PRP4 homolog OS=Homo sapiens OX=9606 GN=PRPF4B PE=1 SV=3      | PRPF4B | 2 | 2 | 2.380%  | 116985.48 | 10.26 |
| Q13601 | sp Q13601 KRR1_HUMAN KRR1 small subunit processome component homolog OS=Homo sapiens OX=9606 GN=KRR1 PE=1 SV=4      | KRR1   | 2 | 2 | 4.200%  | 43664.43  | 9.78  |
| Q14004 | sp Q14004 CDK13_HUMAN Cyclin-dependent kinase 13 OS=Homo sapiens OX=9606 GN=CDK13 PE=1 SV=2                         | CDK13  | 2 | 2 | 1.190%  | 164921.24 | 9.71  |
| Q14244 | sp Q14244 MAP7_HUMAN Ensconsin OS=Homo sapiens OX=9606 GN=MAP7 PE=1 SV=1                                            | MAP7   | 2 | 2 | 2.670%  | 84050.76  | 9.62  |
| Q14571 | sp Q14571 ITPR2_HUMAN Inositol 1,4,5-trisphosphate receptor type 2 OS=Homo sapiens OX=9606 GN=ITPR2 PE=1 SV=2       | ITPR2  | 2 | 2 | 0.480%  | 308060.24 | 6.01  |

|        |                                                                                                                |           |   |   |         |           |      |
|--------|----------------------------------------------------------------------------------------------------------------|-----------|---|---|---------|-----------|------|
| Q15084 | sp Q15084 PDIA6_HUMAN Protein disulfide-isomerase A6<br>OS=Homo sapiens OX=9606 GN=PDIA6 PE=1 SV=1             | PDIA6     | 2 | 2 | 5.680%  | 48120.74  | 4.95 |
| Q15349 | sp Q15349 KS6A2_HUMAN Ribosomal protein S6 kinase alpha-2<br>OS=Homo sapiens OX=9606 GN=RPS6KA2 PE=1 SV=2      | RPS6KA2   | 2 | 2 | 1.770%  | 83237.79  | 8.82 |
| Q15365 | sp Q15365 PCBP1_HUMAN Poly(rC)-binding protein 1<br>OS=Homo sapiens OX=9606 GN=PCBP1 PE=1 SV=2                 | PCBP1     | 2 | 2 | 7.580%  | 37497.43  | 6.66 |
| Q15746 | sp Q15746 MYLK_HUMAN Myosin light chain kinase, smooth muscle<br>OS=Homo sapiens OX=9606 GN=MYLK PE=1 SV=4     | MYLK      | 2 | 2 | 0.680%  | 210712.65 | 5.85 |
| Q16181 | sp Q16181 SEPT7_HUMAN Septin-7 OS=Homo sapiens<br>OX=9606 GN=SEPTIN7 PE=1 SV=2                                 | SEPTIN7   | 2 | 2 | 4.120%  | 50679.38  | 8.76 |
| Q16513 | sp Q16513 PKN2_HUMAN Serine/threonine-protein kinase N2<br>OS=Homo sapiens OX=9606 GN=PKN2 PE=1 SV=1           | PKN2      | 2 | 2 | 1.520%  | 112033.31 | 5.95 |
| Q32MK0 | sp Q32MK0 MYLK3_HUMAN Myosin light chain kinase 3<br>OS=Homo sapiens OX=9606 GN=MYLK3 PE=1 SV=3                | MYLK3     | 2 | 2 | 1.830%  | 88391.85  | 5.76 |
| Q4G0J3 | sp Q4G0J3 LARP7_HUMAN La-related protein 7 OS=Homo sapiens<br>OX=9606 GN=LARP7 PE=1 SV=1                       | LARP7     | 2 | 2 | 2.580%  | 66897.85  | 9.57 |
| Q53GS9 | sp Q53GS9 SNUT2_HUMAN U4/U6.U5 tri-snRNP-associated protein 2<br>OS=Homo sapiens OX=9606 GN=USP39 PE=1 SV=2    | USP39     | 2 | 2 | 2.480%  | 65379.72  | 9.02 |
| Q5CZC0 | sp Q5CZC0 FSIP2_HUMAN Fibrous sheath-interacting protein 2<br>OS=Homo sapiens OX=9606 GN=FSIP2 PE=2 SV=4       | FSIP2     | 2 | 2 | 0.190%  | 780598.32 | 6.27 |
| Q5JQF8 | sp Q5JQF8 PAP1M_HUMAN Polyadenylate-binding protein 1-like 2<br>OS=Homo sapiens OX=9606 GN=PABPC1L2A PE=2 SV=1 | PABPC1L2A | 2 | 2 | 10.000% | 22798.78  | 9.18 |
| Q5SRE5 | sp Q5SRE5 NU188_HUMAN Nucleoporin NUP188 OS=Homo sapiens<br>OX=9606 GN=NUP188 PE=1 SV=1                        | NUP188    | 2 | 2 | 1.600%  | 196040.82 | 6.27 |
| Q69YN4 | sp Q69YN4 VIR_HUMAN Protein virilizer homolog OS=Homo sapiens<br>OX=9606 GN=VIRMA PE=1 SV=2                    | VIRMA     | 2 | 2 | 1.160%  | 202022.63 | 4.9  |

|        |                                                                                                                              |         |   |   |        |           |      |
|--------|------------------------------------------------------------------------------------------------------------------------------|---------|---|---|--------|-----------|------|
| Q6P2E9 | sp Q6P2E9 EDC4_HUMAN Enhancer of mRNA-decapping protein 4 OS=Homo sapiens OX=9606 GN=EDC4 PE=1 SV=1                          | EDC4    | 2 | 2 | 2.210% | 151659.5  | 5.55 |
| Q6UB35 | sp Q6UB35 C1TM_HUMAN Monofunctional C1-tetrahydrofolate synthase, mitochondrial OS=Homo sapiens OX=9606 GN=MTHFD1L PE=1 SV=1 | MTHFD1L | 2 | 2 | 1.640% | 105788.72 | 8.32 |
| Q7Z3K3 | sp Q7Z3K3 POGZ_HUMAN Pogo transposable element with ZNF domain OS=Homo sapiens OX=9606 GN=POGZ PE=1 SV=2                     | POGZ    | 2 | 2 | 1.770% | 155341.98 | 7.14 |
| Q8IV32 | sp Q8IV32 CCD71_HUMAN Coiled-coil domain-containing protein 71 OS=Homo sapiens OX=9606 GN=CCDC71 PE=1 SV=3                   | CCDC71  | 2 | 2 | 3.850% | 49647.53  | 11.8 |
| Q8IVL1 | sp Q8IVL1 NAV2_HUMAN Neuron navigator 2 OS=Homo sapiens OX=9606 GN=NAV2 PE=1 SV=3                                            | NAV2    | 2 | 2 | 0.440% | 268164.34 | 9.13 |
| Q8IYA6 | sp Q8IYA6 CKP2L_HUMAN Cytoskeleton-associated protein 2-like OS=Homo sapiens OX=9606 GN=CKAP2L PE=1 SV=4                     | CKAP2L  | 2 | 2 | 2.010% | 83585.65  | 9.84 |
| Q8N3K9 | sp Q8N3K9 CMYA5_HUMAN Cardiomyopathy-associated protein 5 OS=Homo sapiens OX=9606 GN=CMYA5 PE=1 SV=3                         | CMYA5   | 2 | 2 | 0.390% | 449205.58 | 4.73 |
| Q8N9T8 | sp Q8N9T8 KRI1_HUMAN Protein KRI1 homolog OS=Homo sapiens OX=9606 GN=KRI1 PE=1 SV=3                                          | KRI1    | 2 | 2 | 4.130% | 82597.07  | 5.06 |
| Q8TEX9 | sp Q8TEX9 IPO4_HUMAN Importin-4 OS=Homo sapiens OX=9606 GN=IPO4 PE=1 SV=2                                                    | IPO4    | 2 | 2 | 1.850% | 118713.99 | 4.88 |
| Q8WUM0 | sp Q8WUM0 NU133_HUMAN Nuclear pore complex protein Nup133 OS=Homo sapiens OX=9606 GN=NUP133 PE=1 SV=2                        | NUP133  | 2 | 2 | 1.120% | 128977.5  | 4.98 |
| Q969X6 | sp Q969X6 UTP4_HUMAN U3 small nucleolar RNA-associated protein 4 homolog OS=Homo sapiens OX=9606 GN=UTP4 PE=1 SV=1           | UTP4    | 2 | 2 | 4.960% | 76889.31  | 9.03 |
| Q96P70 | sp Q96P70 IPO9_HUMAN Importin-9 OS=Homo sapiens OX=9606 GN=IPO9 PE=1 SV=3                                                    | IPO9    | 2 | 2 | 2.790% | 115961.54 | 4.71 |
| Q96PY6 | sp Q96PY6 NEK1_HUMAN Serine/threonine-protein kinase Nek1 OS=Homo sapiens OX=9606 GN=NEK1 PE=1 SV=2                          | NEK1    | 2 | 2 | 1.030% | 142826.71 | 5.67 |

|        |                                                                                                                          |          |   |   |         |           |       |
|--------|--------------------------------------------------------------------------------------------------------------------------|----------|---|---|---------|-----------|-------|
| Q96SB4 | sp Q96SB4 SRPK1_HUMAN SRSF protein kinase 1 OS=Homo sapiens OX=9606 GN=SRPK1 PE=1 SV=2                                   | SRPK1    | 2 | 2 | 2.750%  | 74323.92  | 5.81  |
| Q99714 | sp Q99714 HCD2_HUMAN 3-hydroxyacyl-CoA dehydrogenase type-2 OS=Homo sapiens OX=9606 GN=HSD17B10 PE=1 SV=3                | HSD17B10 | 2 | 2 | 11.880% | 26922.78  | 7.65  |
| Q9BQA1 | sp Q9BQA1 MEP50_HUMAN Methylosome protein 50 OS=Homo sapiens OX=9606 GN=WDR77 PE=1 SV=1                                  | WDR77    | 2 | 2 | 6.430%  | 36723.97  | 5.03  |
| Q9BTC0 | sp Q9BTC0 DIDO1_HUMAN Death-inducer obliterator 1 OS=Homo sapiens OX=9606 GN=DIDO1 PE=1 SV=5                             | DIDO1    | 2 | 2 | 1.290%  | 243869.76 | 8.09  |
| Q9BV38 | sp Q9BV38 WDR18_HUMAN WD repeat-containing protein 18 OS=Homo sapiens OX=9606 GN=WDR18 PE=1 SV=2                         | WDR18    | 2 | 2 | 4.860%  | 47404.72  | 6.21  |
| Q9BZI7 | sp Q9BZI7 REN3B_HUMAN Regulator of nonsense transcripts 3B OS=Homo sapiens OX=9606 GN=UPF3B PE=1 SV=1                    | UPF3B    | 2 | 2 | 4.760%  | 57761.35  | 9.48  |
| Q9C0C9 | sp Q9C0C9 UBE2O_HUMAN (E3-independent) E2 ubiquitin-conjugating enzyme OS=Homo sapiens OX=9606 GN=UBE2O UBE2O PE=1 SV=3  | UBE2O    | 2 | 2 | 1.320%  | 141291.84 | 5.01  |
| Q9H3P7 | sp Q9H3P7 GCP60_HUMAN Golgi resident protein GCP60 OS=Homo sapiens OX=9606 GN=ACBD3 PE=1 SV=4                            | ACBD3    | 2 | 2 | 5.490%  | 60592.67  | 5.02  |
| Q9H501 | sp Q9H501 ESF1_HUMAN ESF1 homolog OS=Homo sapiens OX=9606 GN=ESF1 PE=1 SV=1                                              | ESF1     | 2 | 2 | 2.470%  | 98794.99  | 5.01  |
| Q9H6K5 | sp Q9H6K5 PRR36_HUMAN Proline-rich protein 36 OS=Homo sapiens OX=9606 GN=PRR36 PE=1 SV=2                                 | PRR36    | 2 | 2 | 2.150%  | 132746.47 | 10.48 |
| Q9H7B2 | sp Q9H7B2 RPF2_HUMAN Ribosome production factor 2 homolog OS=Homo sapiens OX=9606 GN=RPF2 PE=1 SV=2                      | RPF2     | 2 | 2 | 8.820%  | 35582.45  | 10    |
| Q9NWH9 | sp Q9NWH9 SLTM_HUMAN SAFB-like transcription modulator OS=Homo sapiens OX=9606 GN=SLTM PE=1 SV=2                         | SLTM     | 2 | 2 | 2.320%  | 117147.01 | 7.69  |
| Q9NZB2 | sp Q9NZB2 F120A_HUMAN Constitutive coactivator of PPAR-gamma-like protein 1 OS=Homo sapiens OX=9606 GN=FAM120A PE=1 SV=2 | FAM120A  | 2 | 2 | 2.770%  | 121886.3  | 9.07  |

|            |                                                                                                                                                              |             |   |   |        |           |      |
|------------|--------------------------------------------------------------------------------------------------------------------------------------------------------------|-------------|---|---|--------|-----------|------|
| Q9UBU9     | sp Q9UBU9 NXF1_HUMAN Nuclear RNA export factor 1<br>OS=Homo sapiens OX=9606 GN=NXF1 PE=1 SV=1                                                                | NXF1        | 2 | 2 | 3.230% | 70181.53  | 8.74 |
| Q9UKI8     | sp Q9UKI8 TLK1_HUMAN Serine/threonine-protein kinase<br>tousled-like 1 OS=Homo sapiens OX=9606 GN=TLK1 PE=1 TLK1<br>SV=2                                     | TLK1        | 2 | 2 | 1.700% | 86698.62  | 8.88 |
| Q9UPZ9     | sp Q9UPZ9 CILK1_HUMAN Serine/threonine-protein kinase<br>ICK OS=Homo sapiens OX=9606 GN=CILK1 PE=1 SV=1                                                      | CILK1       | 2 | 2 | 2.060% | 71425.88  | 9.79 |
| Q9Y4W6     | sp Q9Y4W6 AFG32_HUMAN AFG3-like protein 2 OS=Homo<br>sapiens OX=9606 GN=AFG3L2 PE=1 SV=2                                                                     | AFG3L2      | 2 | 2 | 2.130% | 88582.61  | 8.81 |
| Q9Y6M1     | sp Q9Y6M1 IGF2BP2_HUMAN Insulin-like growth factor 2 mRNA-<br>binding protein 2 OS=Homo sapiens OX=9606 GN=IGF2BP2 IGF2BP2<br>PE=1 SV=2                      | IGF2BP2     | 2 | 2 | 5.010% | 66120.59  | 8.48 |
| A0A024QZW2 | tr A0A024QZW2 A0A024QZW2_HUMAN Nucleolar protein 7,<br>27kDa, isoform CRA_a OS=Homo sapiens OX=9606 GN=NOL7 NOL7<br>PE=4 SV=1                                | NOL7        | 2 | 2 | 6.230% | 29426.04  | 9.68 |
| A0A024QZW7 | tr A0A024QZW7 A0A024QZW7_HUMAN Nucleoporin 153kDa,<br>isoform CRA_a OS=Homo sapiens OX=9606 GN=NUP153 NUP153<br>PE=4 SV=1                                    | NUP153      | 2 | 2 | 1.690% | 153966.62 | 8.97 |
| A0A024QZY3 | tr A0A024QZY3 A0A024QZY3_HUMAN Family with sequence<br>similarity 50, member B, isoform CRA_a OS=Homo sapiens FAM50B<br>OX=9606 GN=FAM50B PE=4 SV=1          | FAM50B      | 2 | 2 | 6.770% | 38708.22  | 8.9  |
| A0A024R222 | tr A0A024R222 A0A024R222_HUMAN Phosphoserine<br>aminotransferase OS=Homo sapiens OX=9606 GN=PSAT1 PSAT1<br>PE=3 SV=1                                         | PSAT1       | 2 | 2 | 5.410% | 40422.21  | 7.56 |
| A0A024R3G0 | tr A0A024R3G0 A0A024R3G0_HUMAN Hypoxia up-regulated<br>1, isoform CRA_a OS=Homo sapiens OX=9606 GN=HYOU1 HYOU1<br>PE=3 SV=1                                  | HYOU1       | 2 | 2 | 3.700% | 48984.27  | 9.69 |
| A0A024R3J7 | tr A0A024R3J7 A0A024R3J7_HUMAN Dolichyl-<br>diphosphooligosaccharide--protein glycotransferase OS=Homo hCG_20327<br>sapiens OX=9606 GN=hCG_2032701 PE=3 SV=1 | hCG_2032701 | 2 | 2 | 2.700% | 80427.56  | 7.88 |
| A0A024R663 | tr A0A024R663 A0A024R663_HUMAN Kinectin 1 (Kinesin<br>receptor), isoform CRA_a OS=Homo sapiens OX=9606 KTN1<br>GN=KTN1 PE=4 SV=1                             | KTN1        | 2 | 2 | 1.030% | 156273.39 | 5.52 |
| A0A024R704 | tr A0A024R704 A0A024R704_HUMAN SFRS protein kinase 2,<br>isoform CRA_b OS=Homo sapiens OX=9606 GN=SRPK2 PE=4 SRPK2<br>SV=1                                   | SRPK2       | 2 | 2 | 3.050% | 77525.77  | 4.87 |

|            |                                                                                                                                                                                |         |   |   |         |           |      |
|------------|--------------------------------------------------------------------------------------------------------------------------------------------------------------------------------|---------|---|---|---------|-----------|------|
| A0A024R7X0 | tr A0A024R7X0 A0A024R7X0_HUMAN ADP-ribosylation factor guanine nucleotide-exchange factor 1(Brefeldin A-inhibited), isoform CRA_a OS=Homo sapiens OX=9606 GN=ARFGEF1 PE=4 SV=1 | ARFGEF1 | 2 | 2 | 1.030%  | 208764.73 | 5.58 |
| A0A087WV90 | tr A0A087WV90 A0A087WV90_HUMAN Dystrophin OS=Homo sapiens OX=9606 GN=DMD PE=1 SV=2                                                                                             | DMD     | 2 | 2 | 0.510%  | 271065.17 | 6    |
| A0A087WVR3 | tr A0A087WVR3 A0A087WVR3_HUMAN RING-type E3 ubiquitin transferase OS=Homo sapiens OX=9606 GN=UHRF1 UHRF1 PE=1 SV=1                                                             |         | 2 | 2 | 2.230%  | 91099.41  | 7.42 |
| A0A087WZ11 | tr A0A087WZ11 A0A087WZ11_HUMAN Putative ATP-dependent RNA helicase DHX57 OS=Homo sapiens OX=9606 DHX57 GN=DHX57 PE=1 SV=1                                                      |         | 2 | 2 | 3.810%  | 54082.29  | 5.09 |
| A0A0B4J1W3 | tr A0A0B4J1W3 A0A0B4J1W3_HUMAN N-alpha-acetyltransferase 15, NatA auxiliary subunit OS=Homo sapiens NAA15 OX=9606 GN=NAA15 PE=1 SV=1                                           |         | 2 | 2 | 1.970%  | 101200.22 | 7.23 |
| A0A0S2Z3G5 | tr A0A0S2Z3G5 A0A0S2Z3G5_HUMAN Caspase 10 apoptosis-related cysteine peptidase isoform 3 (Fragment) OS=Homo sapiens OX=9606 GN=CASP10 PE=2 SV=1                                |         | 2 | 2 | 2.090%  | 54565.23  | 5.97 |
| A0A0S2Z3L2 | tr A0A0S2Z3L2 A0A0S2Z3L2_HUMAN P-type Ca(2+) transporter (Fragment) OS=Homo sapiens OX=9606 ATP2A2 GN=ATP2A2 PE=2 SV=1                                                         |         | 2 | 2 | 2.690%  | 114755.63 | 5.23 |
| A0A140TA25 | tr A0A140TA25 A0A140TA25_HUMAN Unconventional myosin-Ih OS=Homo sapiens OX=9606 GN=MYO1H PE=1 SV=1                                                                             | MYO1H   | 2 | 2 | 1.250%  | 119980.32 | 9.24 |
| A0A140VK70 | tr A0A140VK70 A0A140VK70_HUMAN 26S proteasome AAA-ATPase subunit RPT1 OS=Homo sapiens OX=9606 PE=2 SV=1                                                                        |         | 2 | 2 | 2.770%  | 48633.3   | 5.71 |
| A0A1B0GVU9 | tr A0A1B0GVU9 A0A1B0GVU9_HUMAN Glutaminyl-tRNA synthetase (Fragment) OS=Homo sapiens OX=9606 QARS1 GN=QARS1 PE=1 SV=1                                                          |         | 2 | 2 | 2.580%  | 83782.2   | 7.19 |
| A0A1L2BU38 | tr A0A1L2BU38 A0A1L2BU38_HUMAN Anti-staphylococcal enterotoxin E heavy chain variable region (Fragment) OS=Homo sapiens OX=9606 PE=2 SV=1                                      |         | 2 | 2 | 14.400% | 13601.04  | 9.01 |
| A0A1W2PQ90 | tr A0A1W2PQ90 A0A1W2PQ90_HUMAN Zinc-hook domain-containing protein OS=Homo sapiens OX=9606 PE=3 SV=2                                                                           |         | 2 | 2 | 2.310%  | 142939.87 | 6.34 |



|            |                                                                                                                               |           |   |   |         |           |      |
|------------|-------------------------------------------------------------------------------------------------------------------------------|-----------|---|---|---------|-----------|------|
| A0A286YF78 | tr A0A286YF78 A0A286YF78_HUMAN D-3-phosphoglycerate dehydrogenase (Fragment) OS=Homo sapiens OX=9606 PHGDH GN=PHGDH PE=1 SV=1 |           | 2 | 2 | 6.880%  | 29580.95  | 8.4  |
| A0A2R8YF43 | tr A0A2R8YF43 A0A2R8YF43_HUMAN Casein kinase II subunit alpha OS=Homo sapiens OX=9606 GN=CSNK2A1 PE=1 SV=1                    | CSNK2A1   | 2 | 2 | 7.440%  | 41790.2   | 7.19 |
| A0A2U8J9D3 | tr A0A2U8J9D3 A0A2U8J9D3_HUMAN Ig heavy chain variable region (Fragment) OS=Homo sapiens OX=9606 GN=IgH PE=2 IgH SV=1         |           | 2 | 2 | 16.000% | 11463.85  | 7.97 |
| A0A384P5W4 | tr A0A384P5W4 A0A384P5W4_HUMAN Epididymis secretory sperm binding protein OS=Homo sapiens OX=9606 PE=2 SV=1                   |           | 2 | 2 | 1.330%  | 186463.43 | 8.06 |
| A0A3B3IT82 | tr A0A3B3IT82 A0A3B3IT82_HUMAN DNA helicase OS=Homo sapiens OX=9606 GN=BLM PE=1 SV=1                                          | BLM       | 2 | 2 | 1.300%  | 156041.37 | 6.68 |
| A0A4E0W6L3 | tr A0A4E0W6L3 A0A4E0W6L3_HUMAN AEP5A5 (Fragment) OS=Homo sapiens OX=9606 PE=2 SV=1                                            |           | 2 | 2 | 14.170% | 13789.31  | 9.3  |
| A0A590UJC4 | tr A0A590UJC4 A0A590UJC4_HUMAN Cullin-1 OS=Homo sapiens OX=9606 GN=CUL1 PE=1 SV=1                                             | CUL1      | 2 | 2 | 2.650%  | 78372.83  | 8.83 |
| A0A5C2G3H8 | tr A0A5C2G3H8 A0A5C2G3H8_HUMAN c3679_light_IGKV4-1_IGKJ3 (Fragment) OS=Homo sapiens OX=9606 PE=2 SV=1                         | IGL       | 2 | 2 | 21.240% | 12484.77  | 7.93 |
| A0A5C2G7I4 | tr A0A5C2G7I4 A0A5C2G7I4_HUMAN c572_heavy_IGHV3-21_IGHD5-18_IGHJ5 (Fragment) OS=Homo sapiens OX=9606 PE=2 SV=1                | IGH       | 2 | 2 | 20.340% | 12675.08  | 5.28 |
| A0A5C2G8K2 | tr A0A5C2G8K2 A0A5C2G8K2_HUMAN c124_heavy_IGHV3-43_IGHD6-13_IGHJ4 (Fragment) OS=Homo sapiens OX=9606 PE=2 SV=1                | IGH + IGL | 2 | 2 | 9.240%  | 13253.67  | 5.26 |
| A0A5C2GAD3 | tr A0A5C2GAD3 A0A5C2GAD3_HUMAN c235_heavy_IGHV3-23_IGHD3-10_IGHJ5 (Fragment) OS=Homo sapiens OX=9606 PE=2 SV=1                | IGH       | 2 | 2 | 15.630% | 13899.17  | 4.79 |
| A0A5C2GDW3 | tr A0A5C2GDW3 A0A5C2GDW3_HUMAN c109_heavy_IGHV3-11_IGHD3-10_IGHJ4 (Fragment) OS=Homo sapiens OX=9606 PE=2 SV=1                | IGH + IGL | 2 | 2 | 19.830% | 13347.8   | 8.58 |
| A0A5C2GG06 | tr A0A5C2GG06 A0A5C2GG06_HUMAN c1119_heavy_IGHV3-33_IGHD2-8_IGHJ4 (Fragment) OS=Homo sapiens OX=9606 PE=2 SV=1                | IG        | 2 | 2 | 8.550%  | 13077.59  | 9.2  |

|            |                                                                                                            |                         |                       |   |   |         |           |      |
|------------|------------------------------------------------------------------------------------------------------------|-------------------------|-----------------------|---|---|---------|-----------|------|
| A0A5C2GHA7 | tr A0A5C2GHA7 A0A5C2GHA7_HUMAN<br>c248_heavy_IGHV3-9_IGHD1-26_IGHJ3<br>OS=Homo sapiens OX=9606 PE=2 SV=1   | IG<br>(Fragment)        |                       | 2 | 2 | 19.670% | 13415.91  | 7.09 |
| A0A5C2GHD2 | tr A0A5C2GHD2 A0A5C2GHD2_HUMAN<br>c145_heavy_IGHV3-15_IGHD3-10_IGHJ4<br>OS=Homo sapiens OX=9606 PE=2 SV=1  | IGH + IGL<br>(Fragment) |                       | 2 | 2 | 19.670% | 13266.79  | 7    |
| A0A5C2GGM8 | tr A0A5C2GGM8 A0A5C2GGM8_HUMAN<br>c919_light_IGKV2-24_IGKJ2<br>OS=Homo sapiens OX=9606 PE=2 SV=1           | (Fragment)              |                       | 2 | 2 | 10.710% | 12318.85  | 9.44 |
| A0A5C2GNS8 | tr A0A5C2GNS8 A0A5C2GNS8_HUMAN<br>c400_heavy_IGHV3-49_IGHD5-18_IGHJ4<br>OS=Homo sapiens OX=9606 PE=2 SV=1  | IG<br>(Fragment)        |                       | 2 | 2 | 11.670% | 13132.61  | 8.64 |
| A0A5C2GQE3 | tr A0A5C2GQE3 A0A5C2GQE3_HUMAN<br>c1552_heavy_IGHV3-49_IGHD2-15_IGHJ4<br>OS=Homo sapiens OX=9606 PE=2 SV=1 | IG<br>(Fragment)        |                       | 2 | 2 | 16.390% | 13378.79  | 8.05 |
| A0A5C2GSE6 | tr A0A5C2GSE6 A0A5C2GSE6_HUMAN<br>c237_light_IGKV4-1_IGKJ4<br>OS=Homo sapiens OX=9606 PE=2 SV=1            | IG<br>(Fragment)        |                       | 2 | 2 | 17.540% | 12582.92  | 7.93 |
| A0A5C2GUC4 | tr A0A5C2GUC4 A0A5C2GUC4_HUMAN<br>c542_light_IGKV2D-29_IGKJ3<br>OS=Homo sapiens OX=9606 PE=2 SV=1          | IG<br>(Fragment)        |                       | 2 | 2 | 17.860% | 12190.66  | 6.91 |
| A0A5C2GUY1 | tr A0A5C2GUY1 A0A5C2GUY1_HUMAN<br>c1609_heavy_IGHV3-21_IGHD3-10_IGHJ4<br>OS=Homo sapiens OX=9606 PE=2 SV=1 | IG<br>(Fragment)        |                       | 2 | 2 | 20.000% | 13042.33  | 8.57 |
| A0A5C2GWE8 | tr A0A5C2GWE8 A0A5C2GWE8_HUMAN<br>c769_light_IGKV1-5_IGKJ1<br>OS=Homo sapiens OX=9606 PE=2 SV=1            | IG<br>(Fragment)        |                       | 2 | 2 | 15.530% | 11346.66  | 9.1  |
| A0A5C2GY22 | tr A0A5C2GY22 A0A5C2GY22_HUMAN<br>c1517_heavy_IGHV3-33_IGHD2-2_IGHJ6<br>OS=Homo sapiens OX=9606 PE=2 SV=1  | IG<br>(Fragment)        |                       | 2 | 2 | 18.900% | 14038.61  | 8.84 |
| A0A5C2GYK2 | tr A0A5C2GYK2 A0A5C2GYK2_HUMAN<br>c1707_heavy_IGHV3-15_IGHD1-7_IGHJ5<br>OS=Homo sapiens OX=9606 PE=2 SV=1  | IG<br>(Fragment)        |                       | 2 | 2 | 11.570% | 13202.73  | 8.67 |
| A0A5F9ZI57 | tr A0A5F9ZI57 A0A5F9ZI57_HUMAN<br>sapiens OX=9606 GN=ATXN2 PE=1 SV=1                                       | Ataxin-2                | OS=Homo sapiens ATXN2 | 2 | 2 | 1.820%  | 124586.52 | 9.21 |
| A0A7I2V3Z0 | tr A0A7I2V3Z0 A0A7I2V3Z0_HUMAN<br>phosphofructokinase OS=Homo sapiens OX=9606 GN=PFKP PFKP<br>PE=1 SV=1    | ATP-dependent 6-        |                       | 2 | 2 | 2.820%  | 81798.95  | 7.49 |

|            |                                                                                                            |                                                                                            |   |   |         |           |       |
|------------|------------------------------------------------------------------------------------------------------------|--------------------------------------------------------------------------------------------|---|---|---------|-----------|-------|
| A0A7I2V508 | tr A0A7I2V508 A0A7I2V508_HUMAN<br>athanogene 6 OS=Homo sapiens OX=9606 GN=BAG6 PE=1 BAG6<br>SV=1           | BCL2-associated                                                                            | 2 | 2 | 1.960%  | 123451.04 | 5.45  |
| A0A7P0T7V5 | tr A0A7P0T7V5 A0A7P0T7V5_HUMAN<br>heavy chain 1 OS=Homo sapiens OX=9606 GN=DYNC1H1 DYNC1H1<br>PE=1 SV=1    | Cytoplasmic dynein 1                                                                       | 2 | 2 | 0.430%  | 505962.39 | 5.97  |
| A0A7P0TA83 | tr A0A7P0TA83 A0A7P0TA83_HUMAN<br>sapiens OX=9606 GN=RELN PE=1 SV=1                                        | Reelin OS=Homo<br>RELN                                                                     | 2 | 2 | 0.430%  | 388612.89 | 5.5   |
| A0A7P0Z497 | tr A0A7P0Z497 A0A7P0Z497_HUMAN<br>isomerase OS=Homo sapiens OX=9606 GN=PPIB PE=1 SV=1                      | Peptidyl-prolyl cis-trans<br>PPIB                                                          | 2 | 2 | 8.290%  | 20209.98  | 9.19  |
| A0A7S5BZ66 | tr A0A7S5BZ66 A0A7S5BZ66_HUMAN<br>c1208_heavy_IGHV3-33_IGHD3-22_IGHJ4<br>OS=Homo sapiens OX=9606 PE=2 SV=1 | IGH<br>(Fragment)                                                                          | 2 | 2 | 16.260% | 13697.22  | 8.53  |
| A0A7S5BZX9 | tr A0A7S5BZX9 A0A7S5BZX9_HUMAN<br>c1628_heavy_IGHV3-15_IGHD2-21_IGHJ5<br>OS=Homo sapiens OX=9606 PE=2 SV=1 | IGH<br>(Fragment)                                                                          | 2 | 2 | 16.810% | 12829.38  | 8.05  |
| A0A7S5C2L8 | tr A0A7S5C2L8 A0A7S5C2L8_HUMAN<br>c3058_heavy_IGHV3-48_IGHD5-12_IGHJ4<br>OS=Homo sapiens OX=9606 PE=2 SV=1 | IGH<br>(Fragment)                                                                          | 2 | 2 | 11.290% | 13627.99  | 8.01  |
| A0A804CBC2 | tr A0A804CBC2 A0A804CBC2_HUMAN<br>(Fragment) OS=Homo sapiens OX=9606 GN=BAIAP2L2 PE=4<br>SV=1              | Brain-specific<br>angiogenesis inhibitor 1-associated protein 2-like protein 2<br>BAIAP2L2 | 2 | 2 | 2.470%  | 43902.91  | 10.11 |
| A0MNN4     | tr A0MNN4 A0MNN4_HUMAN<br>sapiens OX=9606 GN=SMU1 PE=2 SV=1                                                | CDW3/SMU1 OS=Homo<br>SMU1                                                                  | 2 | 2 | 3.700%  | 57543.25  | 6.74  |
| A2J1N8     | tr A2J1N8 A2J1N8_HUMAN<br>(Fragment) OS=Homo sapiens OX=9606 PE=2 SV=1                                     | Rheumatoid factor RF-ET11                                                                  | 2 | 2 | 17.890% | 10208.35  | 9.39  |
| A8K0T9     | tr A8K0T9 A8K0T9_HUMAN<br>alpha OS=Homo sapiens OX=9606 PE=2 SV=1                                          | F-actin-capping protein subunit                                                            | 2 | 2 | 6.290%  | 32908.34  | 5.44  |
| A8K494     | tr A8K494 A8K494_HUMAN<br>OX=9606 PE=2 SV=1                                                                | Lactotransferrin OS=Homo sapiens                                                           | 2 | 2 | 2.950%  | 78367.33  | 8.56  |

|        |                                                                                                                                                                                                                       |   |   |        |          |      |
|--------|-----------------------------------------------------------------------------------------------------------------------------------------------------------------------------------------------------------------------|---|---|--------|----------|------|
| A8K6Q8 | tr A8K6Q8 A8K6Q8_HUMAN Transferrin receptor protein 1<br>OS=Homo sapiens OX=9606 PE=2 SV=1                                                                                                                            | 2 | 2 | 3.030% | 84872.31 | 6.18 |
| A9CP04 | tr A9CP04 A9CP04_HUMAN Non-specific serine/threonine<br>protein kinase OS=Homo sapiens OX=9606 GN=Par1b PE=2 Par1b<br>SV=1                                                                                            | 2 | 2 | 3.580% | 78422.3  | 9.56 |
| B2RDD7 | tr B2RDD7 B2RDD7_HUMAN Protein arginine N-<br>methyltransferase 5 OS=Homo sapiens OX=9606 PE=2 SV=1                                                                                                                   | 2 | 2 | 2.510% | 72709.1  | 5.88 |
| B3KMZ6 | tr B3KMZ6 B3KMZ6_HUMAN SUMO-activating enzyme subunit<br>2 OS=Homo sapiens OX=9606 PE=2 SV=1                                                                                                                          | 2 | 2 | 3.750% | 71160.64 | 5.15 |
| B3KN57 | tr B3KN57 B3KN57_HUMAN Sorting nexin-2 OS=Homo<br>sapiens OX=9606 PE=2 SV=1                                                                                                                                           | 2 | 2 | 3.080% | 58451.37 | 5.07 |
| B3KS60 | tr B3KS60 B3KS60_HUMAN cDNA FLJ35566 fis, clone<br>SPLEN2005474, highly similar to Homo sapiens CCR4-NOT<br>transcription complex, subunit 1 (CNOT1), transcript variant 1,<br>mRNA OS=Homo sapiens OX=9606 PE=2 SV=1 | 2 | 2 | 6.050% | 36049.54 | 7.16 |
| B3KW21 | tr B3KW21 B3KW21_HUMAN cDNA FLJ41945 fis, clone<br>PLACE6019676, highly similar to Coatomer subunit gamma<br>OS=Homo sapiens OX=9606 PE=2 SV=1                                                                        | 2 | 2 | 4.590% | 67803.98 | 4.93 |
| B4DKS0 | tr B4DKS0 B4DKS0_HUMAN Monocarboxylate transporter 1<br>OS=Homo sapiens OX=9606 PE=2 SV=1                                                                                                                             | 2 | 2 | 6.880% | 51836.06 | 8.78 |
| B4DMG8 | tr B4DMG8 B4DMG8_HUMAN Glutamate dehydrogenase<br>OS=Homo sapiens OX=9606 PE=2 SV=1                                                                                                                                   | 2 | 2 | 3.390% | 55699.81 | 7.23 |
| B4DNW3 | tr B4DNW3 B4DNW3_HUMAN cDNA FLJ51914, highly similar<br>to Protein DEK OS=Homo sapiens OX=9606 PE=2 SV=1                                                                                                              | 2 | 2 | 5.410% | 40160.11 | 8.94 |
| B4DWC0 | tr B4DWC0 B4DWC0_HUMAN cDNA FLJ58290, highly similar<br>to Zinc finger MYM-type protein 6 (Fragment) OS=Homo sapiens<br>OX=9606 PE=2 SV=1                                                                             | 2 | 2 | 1.830% | 96934.54 | 8.72 |
| B4DWH5 | tr B4DWH5 B4DWH5_HUMAN Calcium-activated neutral<br>proteinase 1 OS=Homo sapiens OX=9606 PE=2 SV=1                                                                                                                    | 2 | 2 | 2.420% | 75834.58 | 5.95 |

|        |                                                                                                                                                                                                                             |   |   |         |           |      |
|--------|-----------------------------------------------------------------------------------------------------------------------------------------------------------------------------------------------------------------------------|---|---|---------|-----------|------|
| B4DZM3 | tr B4DZM3 B4DZM3_HUMAN cDNA FLJ61500, highly similar to NNP-1 protein OS=Homo sapiens OX=9606 PE=2 SV=1                                                                                                                     | 2 | 2 | 4.950%  | 46150.35  | 6.39 |
| B4E266 | tr B4E266 B4E266_HUMAN Leucyl-tRNA synthetase OS=Homo sapiens OX=9606 PE=2 SV=1                                                                                                                                             | 2 | 2 | 2.210%  | 129186.78 | 7.89 |
| B7XCW9 | tr B7XCW9 B7XCW9_HUMAN ATP-binding cassette transporter A1 OS=Homo sapiens OX=9606 GN=ABCA1 PE=2 SV=1 ABCA1                                                                                                                 | 2 | 2 | 0.490%  | 254352.21 | 6.47 |
| B7Z1V9 | tr B7Z1V9 B7Z1V9_HUMAN cDNA FLJ53310, highly similar to Puromycin-sensitive aminopeptidase OS=Homo sapiens OX=9606 PE=2 SV=1                                                                                                | 2 | 2 | 4.020%  | 53151.62  | 6.25 |
| B7Z9D5 | tr B7Z9D5 B7Z9D5_HUMAN cDNA FLJ50387 OS=Homo sapiens OX=9606 PE=2 SV=1                                                                                                                                                      | 2 | 2 | 5.080%  | 49377.32  | 9.16 |
| B7ZA13 | tr B7ZA13 B7ZA13_HUMAN Calcium-transporting ATPase OS=Homo sapiens OX=9606 PE=2 SV=1                                                                                                                                        | 2 | 2 | 1.160%  | 103068.19 | 5.65 |
| B8ZZS4 | tr B8ZZS4 B8ZZS4_HUMAN Ankyrin repeat and zinc finger domain-containing protein 1 OS=Homo sapiens OX=9606 ANKZF1 GN=ANKZF1 PE=1 SV=1                                                                                        | 2 | 2 | 3.290%  | 57572.08  | 9.59 |
| B8ZZW2 | tr B8ZZW2 B8ZZW2_HUMAN GRIP and coiled-coil domain-containing protein 2 (Fragment) OS=Homo sapiens OX=9606 GCC2 GN=GCC2 PE=1 SV=1                                                                                           | 2 | 2 | 1.420%  | 107097.06 | 4.86 |
| C7DJS2 | tr C7DJS2 C7DJS2_HUMAN GST class-pi (Fragment) OS=Homo sapiens OX=9606 GN=GSTP1 PE=2 SV=1 GSTP1                                                                                                                             | 2 | 2 | 16.560% | 16666.82  | 4.89 |
| D6W539 | tr D6W539 D6W539_HUMAN Hydroxyacyl-Coenzyme A dehydrogenase/3-ketoacyl-Coenzyme A thiolase/enoyl-Coenzyme A hydratase (Trifunctional protein), beta subunit, HADHB isoform CRA_b OS=Homo sapiens OX=9606 GN=HADHB PE=4 SV=1 | 2 | 2 | 4.030%  | 40413.49  | 9.81 |
| E2PSM9 | tr E2PSM9 E2PSM9_HUMAN cDNA FLJ12599 fis, clone NT2RM4001410 OS=Homo sapiens OX=9606 PE=1 SV=1                                                                                                                              | 2 | 2 | 4.110%  | 40834.36  | 4.66 |
| E5RI93 | tr E5RI93 E5RI93_HUMAN Zinc finger homeobox protein 4 (Fragment) OS=Homo sapiens OX=9606 GN=ZFHX4 PE=1 ZFHX4 SV=2                                                                                                           | 2 | 2 | 0.840%  | 183150.85 | 5.68 |

|        |                                                                                                                           |          |   |   |         |           |      |
|--------|---------------------------------------------------------------------------------------------------------------------------|----------|---|---|---------|-----------|------|
| E5RK37 | tr E5RK37 E5RK37_HUMAN Carbonic anhydrase 2 OS=Homo sapiens OX=9606 GN=CA2 PE=1 SV=1                                      | CA2      | 2 | 2 | 24.750% | 11495.54  | 6.22 |
| E9PRR7 | tr E9PRR7 E9PRR7_HUMAN Protein FRG1 (Fragment) OS=Homo sapiens OX=9606 GN=FRG1 PE=1 SV=1                                  | FRG1     | 2 | 2 | 19.830% | 12515.96  | 5.14 |
| F5GYK2 | tr F5GYK2 F5GYK2_HUMAN Striatin-4 OS=Homo sapiens OX=9606 GN=STRN4 PE=1 SV=1                                              | STRN4    | 2 | 2 | 3.310%  | 68583.76  | 5.06 |
| F6VDE0 | tr F6VDE0 F6VDE0_HUMAN Probable global transcription activator SNF2L2 OS=Homo sapiens OX=9606 GN=SMARCA2 PE=1 SV=2        | SMARCA2  | 2 | 2 | 0.860%  | 172590.35 | 6.68 |
| F8VVU1 | tr F8VVU1 F8VVU1_HUMAN Advillin (Fragment) OS=Homo sapiens OX=9606 GN=AVIL PE=1 SV=1                                      | AVIL     | 2 | 2 | 9.550%  | 17864.93  | 6.05 |
| H0Y2V6 | tr H0Y2V6 H0Y2V6_HUMAN Centrosomal protein of 170 kDa (Fragment) OS=Homo sapiens OX=9606 GN=CEP170 PE=1 SV=1              | CEP170   | 2 | 2 | 1.410%  | 171971.12 | 6.92 |
| H0Y5B5 | tr H0Y5B5 H0Y5B5_HUMAN Protein polybromo-1 (Fragment) OS=Homo sapiens OX=9606 GN=PBRM1 PE=1 SV=1                          | PBRM1    | 2 | 2 | 1.380%  | 126291.14 | 6.51 |
| H0YHC3 | tr H0YHC3 H0YHC3_HUMAN Nucleosome assembly protein 1-like 1 (Fragment) OS=Homo sapiens OX=9606 GN=NAP1L1 PE=1 SV=1        | NAP1L1   | 2 | 2 | 10.610% | 23417.35  | 4.75 |
| H0YHX9 | tr H0YHX9 H0YHX9_HUMAN Nascent polypeptide-associated complex subunit alpha OS=Homo sapiens OX=9606 GN=NACANACA PE=1 SV=2 | NACANACA | 2 | 2 | 11.490% | 25278.74  | 4.51 |
| H0YMU9 | tr H0YMU9 H0YMU9_HUMAN Annexin OS=Homo sapiens OX=9606 GN=ANXA2 PE=1 SV=1                                                 | ANXA2    | 2 | 2 | 8.700%  | 25568.7   | 5.68 |
| H2EHT1 | tr H2EHT1 H2EHT1_HUMAN Cellular tumor antigen p53 OS=Homo sapiens OX=9606 GN=TP53 PE=2 SV=1                               | TP53     | 2 | 2 | 6.210%  | 39319.97  | 8.01 |
| H7C1K6 | tr H7C1K6 H7C1K6_HUMAN Interferon-induced protein 44-like (Fragment) OS=Homo sapiens OX=9606 GN=IFI44L PE=1 SV=1          | IFI44L   | 2 | 2 | 4.740%  | 26479.11  | 8.54 |
| I6L9I5 | tr I6L9I5 I6L9I5_HUMAN CDC2 protein OS=Homo sapiens OX=9606 GN=CDC2 PE=2 SV=1                                             | CDC2     | 2 | 2 | 9.780%  | 25938.85  | 8.41 |

|        |                                                                                                                                               |   |   |        |           |      |
|--------|-----------------------------------------------------------------------------------------------------------------------------------------------|---|---|--------|-----------|------|
| M1VE91 | tr M1VE91 M1VE91_HUMAN KIF5B-RET(NM_020630)_K24R11 fusion protein OS=Homo sapiens KIF5B-RET(OX=9606 GN=KIF5B-RET(NM_020630)_K24;R11 PE=2 SV=1 | 2 | 2 | 1.680% | 155814.18 | 6.14 |
| Q2NL95 | tr Q2NL95 Q2NL95_HUMAN RNA helicase (Fragment) DDX19B OS=Homo sapiens OX=9606 GN=DDX19B PE=2 SV=1                                             | 2 | 2 | 4.450% | 50643.66  | 7.14 |
| Q53F09 | tr Q53F09 Q53F09_HUMAN Karyopherin alpha 3 variant (Fragment) OS=Homo sapiens OX=9606 PE=2 SV=1                                               | 2 | 2 | 3.650% | 57745.25  | 4.9  |
| Q53HG7 | tr Q53HG7 Q53HG7_HUMAN Cortactin isoform a variant (Fragment) OS=Homo sapiens OX=9606 PE=2 SV=1                                               | 2 | 2 | 4.550% | 61557.37  | 5.24 |
| Q53T99 | tr Q53T99 Q53T99_HUMAN Ribosome biogenesis protein WDR12 OS=Homo sapiens OX=9606 GN=WDR12 PE=2 SV=1                                           | 2 | 2 | 9.930% | 47707.42  | 5.57 |
| Q59E88 | tr Q59E88 Q59E88_HUMAN DnaJ (Hsp40) homolog, subfamily A, member 3 variant (Fragment) OS=Homo sapiens OX=9606 PE=2 SV=1                       | 2 | 2 | 3.970% | 52285.82  | 9.37 |
| Q59EL4 | tr Q59EL4 Q59EL4_HUMAN PRPF4 protein variant (Fragment) OS=Homo sapiens OX=9606 PE=2 SV=1                                                     | 2 | 2 | 3.350% | 60021.32  | 7.38 |
| Q5TBI2 | tr Q5TBI2 Q5TBI2_HUMAN Uncharacterized protein C1orf131 (Fragment) OS=Homo sapiens OX=9606 GN=C1orf131 PE=1 SV=1                              | 2 | 2 | 6.640% | 28477.44  | 10.1 |
| Q6AI02 | tr Q6AI02 Q6AI02_HUMAN Uncharacterized protein DKFZp686P168 OS=Homo sapiens OX=9606 DKFZp686P GN=DKFZp686P168 PE=2 SV=1                       | 2 | 2 | 0.970% | 141020.59 | 5.33 |
| Q6FHU2 | tr Q6FHU2 Q6FHU2_HUMAN Phosphoglycerate mutase (Fragment) OS=Homo sapiens OX=9606 GN=PGAM1 PE=2 SV=1                                          | 2 | 2 | 6.300% | 28803.59  | 6.67 |
| Q6I7N8 | tr Q6I7N8 Q6I7N8_HUMAN Lymphoid specific helicase variant9 HELLS OS=Homo sapiens OX=9606 GN=HELLS PE=2 SV=1                                   | 2 | 2 | 2.970% | 93961.34  | 8.36 |
| Q6PUJ7 | tr Q6PUJ7 Q6PUJ7_HUMAN Prohibitin OS=Homo sapiens HEL-215 OX=9606 GN=HEL-215 PE=2 SV=1                                                        | 2 | 2 | 5.880% | 29819.76  | 5.57 |
| Q8IXG0 | tr Q8IXG0 Q8IXG0_HUMAN Crn protein OS=Homo sapiens crn OX=9606 GN=crn PE=2 SV=1                                                               | 2 | 2 | 3.350% | 83138.47  | 6.59 |

|        |                                                                                                                               |          |   |   |         |           |       |
|--------|-------------------------------------------------------------------------------------------------------------------------------|----------|---|---|---------|-----------|-------|
| Q96DI9 | tr Q96DI9 Q96DI9_HUMAN POLDIP3 protein (Fragment)<br>OS=Homo sapiens OX=9606 GN=POLDIP3 PE=2 SV=2                             | POLDIP3  | 2 | 2 | 4.800%  | 45658.25  | 10.04 |
| Q96N31 | tr Q96N31 Q96N31_HUMAN cDNA FLJ31473 fis, clone<br>NT2NE2001530 (Fragment) OS=Homo sapiens OX=9606 PE=2<br>SV=1               |          | 2 | 2 | 1.500%  | 89723.79  | 8.71  |
| Q9NZ23 | tr Q9NZ23 Q9NZ23_HUMAN Drug-sensitive protein 1<br>OS=Homo sapiens OX=9606 GN=YA61 PE=2 SV=1                                  | YA61     | 2 | 2 | 16.180% | 14866.62  | 6.83  |
| Q9UK43 | tr Q9UK43 Q9UK43_HUMAN Chondrosarcoma-associated<br>protein 2 OS=Homo sapiens OX=9606 GN=CSA2 PE=2 SV=1                       | CSA2     | 2 | 2 | 2.870%  | 65585.45  | 6.26  |
| V9HWE0 | tr V9HWE0 V9HWE0_HUMAN Annexin OS=Homo sapiens<br>OX=9606 GN=HEL-S-7 PE=2 SV=1                                                | HEL-S-7  | 2 | 2 | 6.560%  | 35936.34  | 4.94  |
| V9HWF2 | tr V9HWF2 V9HWF2_HUMAN Malate dehydrogenase<br>OS=Homo sapiens OX=9606 GN=HEL-S-32 PE=2 SV=1                                  | HEL-S-32 | 2 | 2 | 5.390%  | 36425.7   | 6.91  |
| V9HWK1 | tr V9HWK1 V9HWK1_HUMAN Triosephosphate isomerase<br>OS=Homo sapiens OX=9606 GN=HEL-S-49 PE=2 SV=1                             | HEL-S-49 | 2 | 2 | 8.840%  | 26669.17  | 6.45  |
| Q8WUA2 | sp Q8WUA2 PPIL4_HUMAN Peptidyl-prolyl cis-trans<br>isomerase-like 4 OS=Homo sapiens OX=9606 GN=PPIL4 PE=1<br>SV=1             | PPIL4    | 1 | 1 | 2.850%  | 57224.41  | 5.63  |
| Q8WUJ3 | sp Q8WUJ3 CEMIP_HUMAN Cell migration-inducing and<br>hyaluronan-binding protein OS=Homo sapiens OX=9606<br>GN=CEMIP PE=1 SV=2 | CEMIP    | 1 | 1 | 0.370%  | 152995.98 | 7.98  |
| Q8WVF5 | sp Q8WVF5 KCTD4_HUMAN BTB/POZ domain-containing<br>protein KCTD4 OS=Homo sapiens OX=9606 GN=KCTD4 PE=1<br>SV=2                | KCTD4    | 1 | 1 | 2.320%  | 29967.02  | 6.62  |
| Q8WWI1 | sp Q8WWI1 LMO7_HUMAN LIM domain only protein 7<br>OS=Homo sapiens OX=9606 GN=LMO7 PE=1 SV=3                                   | LMO7     | 1 | 1 | 0.650%  | 192693.39 | 8.34  |
| Q8WXD2 | sp Q8WXD2 SCG3_HUMAN Secretogranin-3 OS=Homo<br>sapiens OX=9606 GN=SCG3 PE=1 SV=3                                             | SCG3     | 1 | 1 | 2.140%  | 53004.67  | 4.94  |
| Q92830 | sp Q92830 KAT2A_HUMAN Histone acetyltransferase<br>OS=Homo sapiens OX=9606 GN=KAT2A PE=1 SV=3                                 | KAT2A    | 1 | 1 | 1.790%  | 93924.48  | 9.18  |



|        |                                                                                                                              |          |   |   |        |           |       |
|--------|------------------------------------------------------------------------------------------------------------------------------|----------|---|---|--------|-----------|-------|
| Q92859 | sp Q92859 NEO1_HUMAN Neogenin OS=Homo sapiens<br>OX=9606 GN=NEO1 PE=1 SV=2                                                   | NEO1     | 1 | 1 | 0.680% | 160014.65 | 6.08  |
| Q92966 | sp Q92966 SNPC3_HUMAN snRNA-activating protein complex<br>subunit 3 OS=Homo sapiens OX=9606 GN=SNAPC3 PE=1<br>SV=1           | SNAPC3   | 1 | 1 | 1.950% | 46752.2   | 5.12  |
| Q96AE4 | sp Q96AE4 FUBP1_HUMAN Far upstream element-binding<br>protein 1 OS=Homo sapiens OX=9606 GN=FUBP1 PE=1 SV=3                   | FUBP1    | 1 | 1 | 0.780% | 67559.59  | 7.18  |
| Q96EZ8 | sp Q96EZ8 MCRS1_HUMAN Microspherule protein 1<br>OS=Homo sapiens OX=9606 GN=MCRS1 PE=1 SV=1                                  | MCRS1    | 1 | 1 | 2.600% | 51802.7   | 9.41  |
| Q96FC7 | sp Q96FC7 PHIPL_HUMAN Phytanoyl-CoA hydroxylase-<br>interacting protein-like OS=Homo sapiens OX=9606<br>GN=PHYHIPL PE=1 SV=3 | PHYHIPL  | 1 | 1 | 1.860% | 42485.62  | 5.97  |
| Q96JK2 | sp Q96JK2 DCAF5_HUMAN DDB1- and CUL4-associated<br>factor 5 OS=Homo sapiens OX=9606 GN=DCAF5 PE=1 SV=2                       | DCAF5    | 1 | 1 | 0.740% | 103962.1  | 5.48  |
| Q96K76 | sp Q96K76 UBP47_HUMAN Ubiquitin carboxyl-terminal<br>hydrolase 47 OS=Homo sapiens OX=9606 GN=USP47 PE=1<br>SV=3              | USP47    | 1 | 1 | 0.440% | 157309.52 | 4.97  |
| Q96L19 | sp Q96L19 CX058_HUMAN Uncharacterized protein CXorf58<br>OS=Homo sapiens OX=9606 GN=CXorf58 PE=2 SV=2                        | CXorf58  | 1 | 1 | 2.110% | 38899.01  | 10.19 |
| Q96MG2 | sp Q96MG2 JSRP1_HUMAN Junctional sarcoplasmic reticulum<br>protein 1 OS=Homo sapiens OX=9606 GN=JSRP1 PE=1 SV=1              | JSRP1    | 1 | 1 | 2.420% | 36318.24  | 9.43  |
| Q96NL6 | sp Q96NL6 SCLT1_HUMAN Sodium channel and clathrin linker<br>1 OS=Homo sapiens OX=9606 GN=SCLT1 PE=1 SV=2                     | SCLT1    | 1 | 1 | 0.870% | 80909.5   | 5.83  |
| Q96NU0 | sp Q96NU0 CNT3B_HUMAN Contactin-associated protein-like<br>3B OS=Homo sapiens OX=9606 GN=CNTNAP3B PE=2 SV=3                  | CNTNAP3B | 1 | 1 | 1.480% | 140412.96 | 7.19  |
| Q96QI5 | sp Q96QI5 HS3S6_HUMAN Heparan sulfate glucosamine 3-O-<br>sulfotransferase 6 OS=Homo sapiens OX=9606 GN=HS3ST6<br>PE=1 SV=2  | HS3ST6   | 1 | 1 | 2.630% | 37185.61  | 10.8  |
| Q96R84 | sp Q96R84 OR1F2_HUMAN Putative olfactory receptor 1F2<br>OS=Homo sapiens OX=9606 GN=OR1F2P PE=5 SV=2                         | OR1F2P   | 1 | 1 | 4.170% | 34943.17  | 8.92  |

|        |                                                                                                                                     |          |   |   |        |          |       |
|--------|-------------------------------------------------------------------------------------------------------------------------------------|----------|---|---|--------|----------|-------|
| Q96TA1 | sp Q96TA1 NIBA2_HUMAN Protein Niban 2 OS=Homo sapiens<br>OX=9606 GN=NIBAN2 PE=1 SV=3                                                | NIBAN2   | 1 | 1 | 0.800% | 84136.88 | 5.82  |
| Q99496 | sp Q99496 RING2_HUMAN E3 ubiquitin-protein ligase RING2<br>OS=Homo sapiens OX=9606 GN=RNF2 PE=1 SV=1                                | RNF2     | 1 | 1 | 3.270% | 37654.97 | 6.38  |
| Q99525 | sp Q99525 H4G_HUMAN Histone H4-like protein type G<br>OS=Homo sapiens OX=9606 GN=H4C7 PE=1 SV=1                                     | H4C7     | 1 | 1 | 9.180% | 11008.98 | 11.06 |
| Q99549 | sp Q99549 MPP8_HUMAN M-phase phosphoprotein<br>OS=Homo sapiens OX=9606 GN=MPHOSPH8 PE=1 SV=2                                        | MPHOSPH8 | 1 | 1 | 0.810% | 97181.07 | 5.81  |
| Q99615 | sp Q99615 DNJC7_HUMAN DnaJ homolog subfamily C<br>member 7 OS=Homo sapiens OX=9606 GN=DNAJC7 PE=1<br>SV=2                           | DNAJC7   | 1 | 1 | 2.230% | 56440.25 | 6.56  |
| Q99767 | sp Q99767 APBA2_HUMAN Amyloid-beta A4 precursor protein-<br>binding family A member 2 OS=Homo sapiens OX=9606<br>GN=APBA2 PE=1 SV=3 | APBA2    | 1 | 1 | 0.800% | 82511.21 | 4.77  |
| Q9BSC4 | sp Q9BSC4 NOL10_HUMAN Nucleolar protein 10 OS=Homo<br>sapiens OX=9606 GN=NOL10 PE=1 SV=1                                            | NOL10    | 1 | 1 | 1.160% | 80300.57 | 8.64  |
| Q9BUT9 | sp Q9BUT9 MCRI2_HUMAN MAPK regulated corepressor<br>interacting protein 2 OS=Homo sapiens OX=9606 GN=MCRIP2<br>PE=1 SV=2            | MCRIP2   | 1 | 1 | 5.000% | 17827.78 | 9.5   |
| Q9BUY5 | sp Q9BUY5 ZNF426_HUMAN Zinc finger protein 426 OS=Homo<br>sapiens OX=9606 GN=ZNF426 PE=1 SV=1                                       | ZNF426   | 1 | 1 | 2.170% | 63105.36 | 7.96  |
| Q9BW85 | sp Q9BW85 YJU2_HUMAN Splicing factor YJU2 OS=Homo<br>sapiens OX=9606 GN=YJU2 PE=1 SV=1                                              | YJU2     | 1 | 1 | 1.860% | 37085.36 | 5.75  |
| Q9BXJ2 | sp Q9BXJ2 C1QT7_HUMAN Complement C1q tumor necrosis<br>factor-related protein 7 OS=Homo sapiens OX=9606<br>GN=C1QTNF7 PE=2 SV=1     | C1QTNF7  | 1 | 1 | 2.420% | 30682.98 | 5.11  |
| Q9BXN1 | sp Q9BXN1 ASPN_HUMAN Asporin OS=Homo sapiens<br>OX=9606 GN=ASPN PE=1 SV=2                                                           | ASPN     | 1 | 1 | 2.630% | 43416.69 | 6.61  |
| Q9BXY0 | sp Q9BXY0 MAK16_HUMAN Protein MAK16 homolog<br>OS=Homo sapiens OX=9606 GN=MAK16 PE=1 SV=2                                           | MAK16    | 1 | 1 | 4.330% | 35368.2  | 5.27  |

|        |                                                                                                                             |   |   |        |           |       |
|--------|-----------------------------------------------------------------------------------------------------------------------------|---|---|--------|-----------|-------|
| Q9BY44 | sp Q9BY44 EIF2A_HUMAN Eukaryotic translation initiation factor 2A OS=Homo sapiens OX=9606 GN=EIF2A PE=1 SV=3 EIF2A          | 1 | 1 | 1.540% | 64989.32  | 9.01  |
| Q9BYD6 | sp Q9BYD6 RM01_HUMAN 39S ribosomal protein L1, mitochondrial OS=Homo sapiens OX=9606 GN=MRPL1 PE=1 MRPL1 SV=2               | 1 | 1 | 5.230% | 36908.27  | 8.88  |
| Q9BYG3 | sp Q9BYG3 MKI67I_HUMAN MKI67 FHA domain-interacting nucleolar phosphoprotein OS=Homo sapiens OX=9606 NIFK GN=NIFK PE=1 SV=1 | 1 | 1 | 4.780% | 34221.78  | 9.88  |
| Q9C093 | sp Q9C093 SPEF2_HUMAN Sperm flagellar protein 2 OS=Homo sapiens OX=9606 GN=SPEF2 PE=1 SV=2 SPEF2                            | 1 | 1 | 0.490% | 209808.29 | 5.4   |
| Q9GZT8 | sp Q9GZT8 NIF3L_HUMAN NIF3-like protein 1 OS=Homo sapiens OX=9606 GN=NIF3L1 PE=1 SV=2 NIF3L1                                | 1 | 1 | 1.590% | 41967.57  | 6.19  |
| Q9GZW5 | sp Q9GZW5 SCND2_HUMAN Putative SCAN domain-containing protein SCAND2P OS=Homo sapiens OX=9606 SCAND2P GN=SCAND2P PE=5 SV=2  | 1 | 1 | 2.610% | 34216.68  | 10.67 |
| Q9H422 | sp Q9H422 HIPK3_HUMAN Homeodomain-interacting protein kinase 3 OS=Homo sapiens OX=9606 GN=HIPK3 PE=1 SV=1 HIPK3             | 1 | 1 | 0.490% | 133741.64 | 7.16  |
| Q9H7T3 | sp Q9H7T3 CJ095_HUMAN Uncharacterized protein C10orf95 OS=Homo sapiens OX=9606 GN=C10orf95 PE=1 SV=1 C10orf95               | 1 | 1 | 3.500% | 26269.61  | 11.69 |
| Q9H967 | sp Q9H967 WDR76_HUMAN WD repeat-containing protein 76 OS=Homo sapiens OX=9606 GN=WDR76 PE=1 SV=2 WDR76                      | 1 | 1 | 1.760% | 69768.47  | 9.35  |
| Q9HB71 | sp Q9HB71 CYBP_HUMAN Calcyclin-binding protein OS=Homo sapiens OX=9606 GN=CACYBP PE=1 SV=2 CACYBP                           | 1 | 1 | 3.070% | 26209.63  | 8.28  |
| Q9HCD5 | sp Q9HCD5 NCOA5_HUMAN Nuclear receptor coactivator 5 OS=Homo sapiens OX=9606 GN=NCOA5 PE=1 SV=2 NCOA5                       | 1 | 1 | 2.590% | 65535.72  | 9.62  |
| Q9HCM2 | sp Q9HCM2 PLXA4_HUMAN Plexin-A4 OS=Homo sapiens OX=9606 GN=PLXNA4 PE=1 SV=4 PLXNA4                                          | 1 | 1 | 0.260% | 212452.68 | 6.42  |
| Q9HD43 | sp Q9HD43 PTPRH_HUMAN Receptor-type tyrosine-protein phosphatase H OS=Homo sapiens OX=9606 GN=PTPRH PE=1 PTPRH SV=4         | 1 | 1 | 0.630% | 122351.51 | 5.16  |

|        |                                                                                                                            |   |   |        |           |       |
|--------|----------------------------------------------------------------------------------------------------------------------------|---|---|--------|-----------|-------|
| Q9NPF5 | sp Q9NPF5 DMAP1_HUMAN DNA methyltransferase 1-associated protein 1 OS=Homo sapiens OX=9606 GN=DMAP1 DMAP1 PE=1 SV=1        | 1 | 1 | 2.570% | 52991.95  | 9.51  |
| Q9NTJ4 | sp Q9NTJ4 MA2C1_HUMAN Alpha-mannosidase 2C1 OS=Homo sapiens OX=9606 GN=MAN2C1 PE=1 SV=1                                    | 1 | 1 | 0.670% | 115833.89 | 6.1   |
| Q9NUP9 | sp Q9NUP9 LIN7C_HUMAN Protein lin-7 homolog C OS=Homo sapiens OX=9606 GN=LIN7C PE=1 SV=1                                   | 1 | 1 | 3.050% | 21833.72  | 8.52  |
| Q9NVH1 | sp Q9NVH1 DJC11_HUMAN DnaJ homolog subfamily C member 11 OS=Homo sapiens OX=9606 GN=DNAJC11 PE=1 DNAJC11 SV=2              | 1 | 1 | 1.610% | 63277.32  | 8.54  |
| Q9NWU2 | sp Q9NWU2 GID8_HUMAN Glucose-induced degradation protein 8 homolog OS=Homo sapiens OX=9606 GN=GID8 PE=1 GID8 SV=1          | 1 | 1 | 4.820% | 26748.26  | 4.92  |
| Q9NY12 | sp Q9NY12 GAR1_HUMAN H/ACA ribonucleoprotein complex subunit 1 OS=Homo sapiens OX=9606 GN=GAR1 PE=1 SV=1                   | 1 | 1 | 3.230% | 22347.61  | 10.91 |
| Q9NY61 | sp Q9NY61 AATF_HUMAN Protein AATF OS=Homo sapiens OX=9606 GN=AATF PE=1 SV=1                                                | 1 | 1 | 2.500% | 63132.18  | 4.83  |
| Q9NY93 | sp Q9NY93 DDX56_HUMAN Probable ATP-dependent RNA helicase DDX56 OS=Homo sapiens OX=9606 GN=DDX56 DDX56 PE=1 SV=1           | 1 | 1 | 2.560% | 61588.79  | 9.34  |
| Q9NYS7 | sp Q9NYS7 WSB2_HUMAN WD repeat and SOCS box-containing protein 2 OS=Homo sapiens OX=9606 GN=WSB2 WSB2 PE=2 SV=1            | 1 | 1 | 1.730% | 45285.65  | 8.36  |
| Q9P241 | sp Q9P241 AT10D_HUMAN Phospholipid-transporting ATPase VD OS=Homo sapiens OX=9606 GN=ATP10D PE=1 SV=3                      | 1 | 1 | 0.770% | 160272.06 | 6.78  |
| Q9P265 | sp Q9P265 DIP2B_HUMAN Disco-interacting protein 2 homolog B OS=Homo sapiens OX=9606 GN=DIP2B PE=1 SV=3                     | 1 | 1 | 1.080% | 171489.66 | 8.43  |
| Q9P299 | sp Q9P299 COPZ2_HUMAN Coatamer subunit zeta-2 OS=Homo sapiens OX=9606 GN=COPZ2 PE=2 SV=1                                   | 1 | 1 | 3.810% | 23547.68  | 5.08  |
| Q9P210 | sp Q9P210 CPSF2_HUMAN Cleavage and polyadenylation specificity factor subunit 2 OS=Homo sapiens OX=9606 GN=CPSF2 PE=1 SV=2 | 1 | 1 | 1.020% | 88485.75  | 4.98  |

|        |                                                                                                                         |          |   |   |         |           |      |
|--------|-------------------------------------------------------------------------------------------------------------------------|----------|---|---|---------|-----------|------|
| Q9P2Q2 | sp Q9P2Q2 FRM4A_HUMAN FERM domain-containing protein 4A OS=Homo sapiens OX=9606 GN=FRMD4A PE=1 SV=3                     | FRMD4A   | 1 | 1 | 1.060%  | 115456.98 | 8.98 |
| Q9UBC2 | sp Q9UBC2 EP15R_HUMAN Epidermal growth factor receptor substrate 15-like 1 OS=Homo sapiens OX=9606 GN=EPS15L1 PE=1 SV=1 | EPS15L1  | 1 | 1 | 0.930%  | 94253.92  | 4.93 |
| Q9UBX3 | sp Q9UBX3 DIC_HUMAN Mitochondrial dicarboxylate carrier OS=Homo sapiens OX=9606 GN=SLC25A10 PE=1 SV=2                   | SLC25A10 | 1 | 1 | 2.790%  | 31282.12  | 9.62 |
| Q9UDW1 | sp Q9UDW1 QCR9_HUMAN Cytochrome b-c1 complex subunit 9 OS=Homo sapiens OX=9606 GN=UQCR10 PE=1 SV=3                      | UQCR10   | 1 | 1 | 11.110% | 7308.4    | 9.45 |
| Q9UGP4 | sp Q9UGP4 LIMD1_HUMAN LIM domain-containing protein 1 OS=Homo sapiens OX=9606 GN=LIMD1 PE=1 SV=1                        | LIMD1    | 1 | 1 | 0.740%  | 72189.47  | 6.2  |
| Q9UHP6 | sp Q9UHP6 RSP14_HUMAN Radial spoke head 14 homolog OS=Homo sapiens OX=9606 GN=RSPH14 PE=1 SV=1                          | RSPH14   | 1 | 1 | 2.870%  | 38591.64  | 6.43 |
| Q9UJV9 | sp Q9UJV9 DDX41_HUMAN Probable ATP-dependent RNA helicase DDX41 OS=Homo sapiens OX=9606 GN=DDX41 PE=1 SV=2              | DDX41    | 1 | 1 | 1.130%  | 69836.86  | 6.4  |
| Q9UJX2 | sp Q9UJX2 CDC23_HUMAN Cell division cycle protein 23 homolog OS=Homo sapiens OX=9606 GN=CDC23 PE=1 SV=3                 | CDC23    | 1 | 1 | 1.010%  | 68833.38  | 6.59 |
| Q9UKB1 | sp Q9UKB1 FBW1B_HUMAN F-box/WD repeat-containing protein 11 OS=Homo sapiens OX=9606 GN=FBXW11 PE=1 SV=1                 | FBXW11   | 1 | 1 | 2.210%  | 62090.21  | 6.73 |
| Q9UKJ3 | sp Q9UKJ3 GPTC8_HUMAN G patch domain-containing protein 8 OS=Homo sapiens OX=9606 GN=GPATCH8 PE=1 SV=2                  | GPATCH8  | 1 | 1 | 0.400%  | 164195.41 | 8.81 |
| Q9UKL3 | sp Q9UKL3 C8AP2_HUMAN CASP8-associated protein 2 OS=Homo sapiens OX=9606 GN=CASP8AP2 PE=1 SV=1                          | CASP8AP2 | 1 | 1 | 0.400%  | 222655.25 | 6.14 |
| Q9UKN8 | sp Q9UKN8 TF3C4_HUMAN General transcription factor 3C polypeptide 4 OS=Homo sapiens OX=9606 GN=GTF3C4 PE=1 SV=2         | GTF3C4   | 1 | 1 | 1.090%  | 91981.34  | 6.21 |
| Q9ULI4 | sp Q9ULI4 KIF26A_HUMAN Kinesin-like protein OS=Homo sapiens OX=9606 GN=KIF26A PE=1 SV=3                                 | KIF26A   | 1 | 1 | 0.320%  | 194587.47 | 9.12 |

|        |                                                                                                                      |   |   |        |           |      |
|--------|----------------------------------------------------------------------------------------------------------------------|---|---|--------|-----------|------|
| Q9ULN7 | sp Q9ULN7 PNM8B_HUMAN Paraneoplastic antigen-like protein 8B OS=Homo sapiens OX=9606 GN=PNMA8B PE=2 PNMA8B SV=4      | 1 | 1 | 0.940% | 68614.35  | 5.35 |
| Q9UMQ3 | sp Q9UMQ3 BARX2_HUMAN Homeobox protein BarH-like 2 OS=Homo sapiens OX=9606 GN=BARX2 PE=1 SV=3                        | 1 | 1 | 2.510% | 31187.38  | 8.65 |
| Q9UPP1 | sp Q9UPP1 PHF8_HUMAN Histone lysine demethylase PHF8 OS=Homo sapiens OX=9606 GN=PHF8 PE=1 SV=3                       | 1 | 1 | 0.660% | 117862.7  | 8.92 |
| Q9UPU7 | sp Q9UPU7 TBD2B_HUMAN TBC1 domain family member 2B OS=Homo sapiens OX=9606 GN=TBC1D2B PE=1 SV=2                      | 1 | 1 | 1.040% | 109879.15 | 5.85 |
| Q9UQ07 | sp Q9UQ07 MOK_HUMAN MAPK/MAK/MRK overlapping kinase OS=Homo sapiens OX=9606 GN=MOK PE=2 SV=1                         | 1 | 1 | 1.430% | 48013.26  | 9.64 |
| Q9Y2I7 | sp Q9Y2I7 FYV1_HUMAN 1-phosphatidylinositol 3-phosphate 5-kinase OS=Homo sapiens OX=9606 GN=PIKFYVE PE=1 SV=3        | 1 | 1 | 0.380% | 237133.52 | 6.24 |
| Q9Y2P4 | sp Q9Y2P4 S27A6_HUMAN Long-chain fatty acid transport protein 6 OS=Homo sapiens OX=9606 GN=SLC27A6 PE=1 SV=1         | 1 | 1 | 0.810% | 70110.77  | 8.75 |
| Q9Y2Y9 | sp Q9Y2Y9 KLF13_HUMAN Krueppel-like factor 13 OS=Homo sapiens OX=9606 GN=KLF13 PE=1 SV=1                             | 1 | 1 | 2.430% | 31179.55  | 9.63 |
| Q9Y3B8 | sp Q9Y3B8 ORN_HUMAN Oligoribonuclease, mitochondrial OS=Homo sapiens OX=9606 GN=REXO2 PE=1 SV=3                      | 1 | 1 | 2.530% | 26832.47  | 6.4  |
| Q9Y3F4 | sp Q9Y3F4 STRAP_HUMAN Serine-threonine kinase receptor-associated protein OS=Homo sapiens OX=9606 GN=STRAP PE=1 SV=1 | 1 | 1 | 3.140% | 38437.86  | 4.98 |
| Q9Y4B6 | sp Q9Y4B6 DCAF1_HUMAN DDB1- and CUL4-associated factor 1 OS=Homo sapiens OX=9606 GN=DCAF1 PE=1 SV=3                  | 1 | 1 | 0.600% | 169005.36 | 4.92 |
| Q9Y4C8 | sp Q9Y4C8 RBM19_HUMAN Probable RNA-binding protein 19 OS=Homo sapiens OX=9606 GN=RBM19 PE=1 SV=3                     | 1 | 1 | 1.250% | 107330.45 | 6.13 |
| Q9Y4K1 | sp Q9Y4K1 CRBG1_HUMAN Beta/gamma crystallin domain-containing protein 1 OS=Homo sapiens OX=9606 GN=CRYBG1 PE=1 SV=3  | 1 | 1 | 0.810% | 188673.6  | 5.61 |

|            |                                                                                                                                                   |   |   |        |           |      |
|------------|---------------------------------------------------------------------------------------------------------------------------------------------------|---|---|--------|-----------|------|
| Q9Y4K4     | sp Q9Y4K4 M4K5_HUMAN Mitogen-activated protein kinase kinase kinase 5 OS=Homo sapiens OX=9606 MAP4K5 GN=MAP4K5 PE=1 SV=2                          | 1 | 1 | 1.060% | 95022.89  | 7.97 |
| Q9Y4P3     | sp Q9Y4P3 TBL2_HUMAN Transducin beta-like protein 2 OS=Homo sapiens OX=9606 GN=TBL2 PE=1 SV=1                                                     | 1 | 1 | 2.910% | 49797.3   | 9.52 |
| Q9Y5A9     | sp Q9Y5A9 YTHD2_HUMAN YTH domain-containing family protein 2 OS=Homo sapiens OX=9606 GN=YTHDF2 PE=1 YTHDF2 SV=2                                   | 1 | 1 | 1.550% | 62333.4   | 8.87 |
| Q9Y5I4     | sp Q9Y5I4 PCDC2_HUMAN Protocadherin alpha-C2 OS=Homo sapiens OX=9606 GN=PCDHAC2 PE=2 SV=1                                                         | 1 | 1 | 0.700% | 109448.74 | 5.26 |
| Q9Y661     | sp Q9Y661 HS3S4_HUMAN Heparan sulfate glucosamine 3-O-sulfotransferase 4 OS=Homo sapiens OX=9606 GN=HS3ST4 HS3ST4 PE=2 SV=3                       | 1 | 1 | 1.750% | 49798.52  | 8.82 |
| Q9Y697     | sp Q9Y697 NFS1_HUMAN Cysteine desulfurase, mitochondrial OS=Homo sapiens OX=9606 GN=NFS1 PE=1 SV=3                                                | 1 | 1 | 1.530% | 50195.12  | 8.54 |
| Q9Y6B6     | sp Q9Y6B6 SAR1B_HUMAN GTP-binding protein SAR1b OS=Homo sapiens OX=9606 GN=SAR1B PE=1 SV=1                                                        | 1 | 1 | 5.560% | 22409.63  | 5.76 |
| A0A024QZ30 | tr A0A024QZ30 A0A024QZ30_HUMAN Succinate dehydrogenase [ubiquinone] flavoprotein subunit, mitochondrial OS=Homo sapiens OX=9606 GN=SDHA PE=3 SV=1 | 1 | 1 | 1.960% | 72690.72  | 7.06 |
| A0A024QZB1 | tr A0A024QZB1 A0A024QZB1_HUMAN HCG1998636, isoform CRA_a OS=Homo sapiens OX=9606 GN=hCG_1998636 PE=4 hCG_19986 SV=1                               | 1 | 1 | 1.390% | 111488.48 | 5.25 |
| A0A024QZN8 | tr A0A024QZN8 A0A024QZN8_HUMAN Hect domain and RLD 4, isoform CRA_b OS=Homo sapiens OX=9606 GN=HERC4 HERC4 PE=4 SV=1                              | 1 | 1 | 0.570% | 117695.62 | 5.86 |
| A0A024QZR5 | tr A0A024QZR5 A0A024QZR5_HUMAN Adaptor-related protein complex 3, mu 1 subunit, isoform CRA_a OS=Homo sapiens AP3M1 OX=9606 GN=AP3M1 PE=3 SV=1    | 1 | 1 | 1.910% | 46938.61  | 6.47 |
| A0A024R0R1 | tr A0A024R0R1 A0A024R0R1_HUMAN Rho guanine nucleotide exchange factor (GEF) 1, isoform CRA_e OS=Homo sapiens ARHGEF1 OX=9606 GN=ARHGEF1 PE=4 SV=1 | 1 | 1 | 1.100% | 102434.12 | 5.47 |
| A0A024R2T9 | tr A0A024R2T9 A0A024R2T9_HUMAN Ubiquitin specific peptidase 19, isoform CRA_a OS=Homo sapiens OX=9606 USP19 GN=USP19 PE=4 SV=1                    | 1 | 1 | 0.760% | 145671.16 | 5.94 |

|            |                                                                                                                                                             |   |   |         |          |       |
|------------|-------------------------------------------------------------------------------------------------------------------------------------------------------------|---|---|---------|----------|-------|
| A0A024R3C3 | tr A0A024R3C3 A0A024R3C3_HUMAN Cysteine and histidine-rich domain (CHORD)-containing 1, isoform CRA_b OS=Homo sapiens OX=9606 GN=CHORDC1 PE=4 SV=1          | 1 | 1 | 4.790%  | 35329.88 | 7.53  |
| A0A024R4N6 | tr A0A024R4N6 A0A024R4N6_HUMAN Zinc finger protein 577, isoform CRA_b OS=Homo sapiens OX=9606 GN=ZNF577 ZNF577 PE=4 SV=1                                    | 1 | 1 | 1.240%  | 54937.95 | 9.39  |
| A0A024R4V6 | tr A0A024R4V6 A0A024R4V6_HUMAN Mannosyltransferase OS=Homo sapiens OX=9606 GN=ALG12 ALG12 PE=3 SV=1                                                         | 1 | 1 | 1.840%  | 54654.03 | 9.63  |
| A0A024R5H2 | tr A0A024R5H2 A0A024R5H2_HUMAN FCH and double SH3 domains 2, isoform CRA_a OS=Homo sapiens OX=9606 FCHSD2 GN=FCHSD2 PE=4 SV=1                               | 1 | 1 | 0.880%  | 77750.97 | 5.4   |
| A0A024R6W0 | tr A0A024R6W0 A0A024R6W0_HUMAN Aspartate aminotransferase OS=Homo sapiens OX=9606 GN=GOT2 GOT2 PE=3 SV=1                                                    | 1 | 1 | 1.630%  | 47475.03 | 9.14  |
| A0A024R7B0 | tr A0A024R7B0 A0A024R7B0_HUMAN Ubiquitin-like protein 5 OS=Homo sapiens OX=9606 GN=UBL5 UBL5 PE=2 SV=1                                                      | 1 | 1 | 10.960% | 8546.83  | 8.58  |
| A0A024R7F2 | tr A0A024R7F2 A0A024R7F2_HUMAN Peroxiredoxin 2, isoform CRA_d OS=Homo sapiens OX=9606 GN=PRDX2 PRDX2 PE=4 SV=1                                              | 1 | 1 | 7.040%  | 15818.33 | 9.14  |
| A0A024R994 | tr A0A024R994 A0A024R994_HUMAN Copine III, isoform CRA_a OS=Homo sapiens OX=9606 GN=CPNE3 CPNE3 PE=3 SV=1                                                   | 1 | 1 | 1.680%  | 60129.96 | 5.6   |
| A0A024R9K7 | tr A0A024R9K7 A0A024R9K7_HUMAN ER membrane protein complex subunit 7 OS=Homo sapiens OX=9606 GN=C15orf24 C15orf24 PE=3 SV=1                                 | 1 | 1 | 4.380%  | 35416.45 | 9.64  |
| A0A024R9P1 | tr A0A024R9P1 A0A024R9P1_HUMAN RNA-binding protein with serine-rich domain 1 OS=Homo sapiens OX=9606 hCG_20267 GN=hCG_2026745 PE=3 SV=1                     | 1 | 1 | 2.300%  | 34108.79 | 11.81 |
| A0A024R9W7 | tr A0A024R9W7 A0A024R9W7_HUMAN Transmembrane protein 33, isoform CRA_a OS=Homo sapiens OX=9606 TMEM33 GN=TMEM33 PE=3 SV=1                                   | 1 | 1 | 4.860%  | 27977.84 | 9.76  |
| A0A024RAV6 | tr A0A024RAV6 A0A024RAV6_HUMAN Potassium inwardly-rectifying channel, subfamily J, member 8, isoform CRA_a OS=Homo sapiens OX=9606 GN=KCNJ8 KCNJ8 PE=3 SV=1 | 1 | 1 | 1.420%  | 47967.38 | 9.38  |
| A0A024RBQ0 | tr A0A024RBQ0 A0A024RBQ0_HUMAN Calcium/calmodulin-dependent protein kinase kinase 2, beta, isoform CRA_f OS=Homo sapiens OX=9606 GN=CAMKK2 CAMKK2 PE=4 SV=1 | 1 | 1 | 1.020%  | 64745.1  | 6.25  |



|             |                                                                                                                             |   |   |        |           |      |
|-------------|-----------------------------------------------------------------------------------------------------------------------------|---|---|--------|-----------|------|
| A0A024RBQ9  | tr A0A024RBQ9 A0A024RBQ9_HUMAN Dynein regulatory complex protein 10 OS=Homo sapiens OX=9606 GN=IQCD IQCD PE=3 SV=1          | 1 | 1 | 2.880% | 40094.05  | 9.37 |
| A0A024RE18  | tr A0A024RE18 A0A024RE18_HUMAN Prominin 2, isoform CRA_a OS=Homo sapiens OX=9606 GN=PROM2 PE=3 SV=1 PROM2                   | 1 | 1 | 1.080% | 91910.05  | 5.86 |
| A0A075B764  | tr A0A075B764 A0A075B764_HUMAN Neuroblastoma breakpoint family member 12 OS=Homo sapiens OX=9606 NBPF12 GN=NBPF12 PE=4 SV=1 | 1 | 1 | 0.720% | 128033.99 | 4.79 |
| A0A087WV68  | tr A0A087WV68 A0A087WV68_HUMAN TAR DNA-binding protein 43 (Fragment) OS=Homo sapiens OX=9606 TARDBP GN=TARDBP PE=1 SV=1     | 1 | 1 | 5.190% | 23977.09  | 8.64 |
| A0A087WVC6  | tr A0A087WVC6 A0A087WVC6_HUMAN Protein-tyrosine-phosphatase OS=Homo sapiens OX=9606 GN=PTPRJ PE=1 PTPRJ SV=1                | 1 | 1 | 1.190% | 146556.5  | 5.41 |
| A0A087WW81  | tr A0A087WW81 A0A087WW81_HUMAN Rootletin (Fragment) OS=Homo sapiens OX=9606 GN=CROCC PE=1 SV=6 CROCC                        | 1 | 1 | 1.070% | 95739.41  | 5.22 |
| A0A087WWF4  | tr A0A087WWF4 A0A087WWF4_HUMAN Kanadaptin (Fragment) OS=Homo sapiens OX=9606 GN=SLC4A1AP PE=1 SLC4A1AP SV=1                 | 1 | 1 | 3.300% | 30977.97  | 4.52 |
| A0A087WWK1  | tr A0A087WWK1 A0A087WWK1_HUMAN Zinc finger protein 518A (Fragment) OS=Homo sapiens OX=9606 GN=ZNF518A ZNF518A PE=1 SV=1     | 1 | 1 | 2.070% | 39603.25  | 9.45 |
| A0A087WXH1  | tr A0A087WXH1 A0A087WXH1_HUMAN Protein lifeguard 4 OS=Homo sapiens OX=9606 GN=TMBIM4 PE=3 SV=1 TMBIM4                       | 1 | 1 | 2.380% | 23716.75  | 6.96 |
| A0A087W XK8 | tr A0A087W XK8 A0A087W XK8_HUMAN Chromosome 20 open reading frame 129 OS=Homo sapiens OX=9606 GN=FAM83D FAM83D PE=1 SV=1    | 1 | 1 | 1.460% | 67663.64  | 6.49 |
| A0A087WYF0  | tr A0A087WYF0 A0A087WYF0_HUMAN Nucleolar protein of 40 kDa OS=Homo sapiens OX=9606 GN=ZCCHC17 PE=1 SV=1 ZCCHC17             | 1 | 1 | 6.880% | 18290.01  | 11.1 |
| A0A087WYN0  | tr A0A087WYN0 A0A087WYN0_HUMAN Transporter OS=Homo sapiens OX=9606 GN=SLC6A6 PE=1 SV=1 SLC6A6                               | 1 | 1 | 2.610% | 52024.62  | 9.49 |
| A0A087X0J6  | tr A0A087X0J6 A0A087X0J6_HUMAN UPF0193 protein OS=Homo sapiens OX=9606 GN=C22orf23 PE=4 SV=1 C22orf23                       | 1 | 1 | 3.570% | 22299.43  | 9.68 |

|            |                                                                                                                                                        |          |   |   |         |           |       |
|------------|--------------------------------------------------------------------------------------------------------------------------------------------------------|----------|---|---|---------|-----------|-------|
| A0A087X234 | tr A0A087X234 A0A087X234_HUMAN Tubulin polyglutamylase<br>TTLL7 OS=Homo sapiens OX=9606 GN=TTLL7 PE=1 SV=1                                             | TTLL7    | 1 | 1 | 2.210%  | 63576.58  | 9.44  |
| A0A087X2E4 | tr A0A087X2E4 A0A087X2E4_HUMAN Contactin-associated<br>protein-like 3B (Fragment) OS=Homo sapiens OX=9606 CNTNAP3B<br>GN=CNTNAP3B PE=4 SV=1            | CNTNAP3B | 1 | 1 | 3.590%  | 18681.91  | 6.06  |
| A0A0A0MQS3 | tr A0A0A0MQS3 A0A0A0MQS3_HUMAN Leydig cell tumor 10<br>kDa protein homolog (Fragment) OS=Homo sapiens OX=9606 C19orf53<br>GN=C19orf53 PE=1 SV=1        | C19orf53 | 1 | 1 | 6.250%  | 8873.32   | 12.02 |
| A0A0A0MR18 | tr A0A0A0MR18 A0A0A0MR18_HUMAN Doublesex- and mab-<br>3-related transcription factor 2 OS=Homo sapiens OX=9606 DMRT2<br>GN=DMRT2 PE=1 SV=1             | DMRT2    | 1 | 1 | 1.480%  | 45224.87  | 8.72  |
| A0A0A0MRB5 | tr A0A0A0MRB5 A0A0A0MRB5_HUMAN MAP kinase-<br>activating death domain protein OS=Homo sapiens OX=9606 MADD<br>GN=MADD PE=1 SV=1                        | MADD     | 1 | 1 | 0.500%  | 176552.59 | 5.78  |
| A0A0A0MS31 | tr A0A0A0MS31 A0A0A0MS31_HUMAN Caspase-8 OS=Homo<br>sapiens OX=9606 GN=CASP8 PE=1 SV=1                                                                 | CASP8    | 1 | 1 | 2.880%  | 32487     | 5.76  |
| A0A0A0MS84 | tr A0A0A0MS84 A0A0A0MS84_HUMAN Centrosomal protein of<br>83 kDa OS=Homo sapiens OX=9606 GN=CEP83 PE=1 SV=1                                             | CEP83    | 1 | 1 | 1.480%  | 56054.76  | 6.03  |
| A0A0A0MTM4 | tr A0A0A0MTM4 A0A0A0MTM4_HUMAN Zinc finger protein<br>793 OS=Homo sapiens OX=9606 GN=ZNF793 PE=4 SV=1                                                  | ZNF793   | 1 | 1 | 3.930%  | 34421.17  | 9.77  |
| A0A0A7EP75 | tr A0A0A7EP75 A0A0A7EP75_HUMAN Truncated UNCX<br>homeobox protein transcript variant 2 OS=Homo sapiens UNCX<br>OX=9606 GN=UNCX PE=2 SV=1               | UNCX     | 1 | 1 | 4.980%  | 23613.33  | 8.6   |
| A0A0B4J253 | tr A0A0B4J253 A0A0B4J253_HUMAN Dolichyl-phosphate-<br>mannose--protein mannosyltransferase OS=Homo sapiens TMTC2<br>OX=9606 GN=TMTC2 PE=1 SV=1         | TMTC2    | 1 | 1 | 1.200%  | 93566.01  | 9.11  |
| A0A0B4J296 | tr A0A0B4J296 A0A0B4J296_HUMAN Elongin-B OS=Homo<br>sapiens OX=9606 GN=ELOB PE=1 SV=1                                                                  | ELOB     | 1 | 1 | 10.610% | 7756.11   | 10.03 |
| A0A0C4DFS8 | tr A0A0C4DFS8 A0A0C4DFS8_HUMAN Nicotinamide<br>phosphoribosyltransferase OS=Homo sapiens OX=9606 NAMPT<br>GN=NAMPT PE=1 SV=1                           | NAMPT    | 1 | 1 | 1.900%  | 41864.09  | 6.04  |
| A0A0C4DG62 | tr A0A0C4DG62 A0A0C4DG62_HUMAN ADP-ribosylation<br>factor-like protein 6-interacting protein 4 OS=Homo sapiens ARL6IP4<br>OX=9606 GN=ARL6IP4 PE=1 SV=1 | ARL6IP4  | 1 | 1 | 4.130%  | 24591.39  | 10.94 |

|            |                                                                                                                                   |                                 |   |   |         |          |       |
|------------|-----------------------------------------------------------------------------------------------------------------------------------|---------------------------------|---|---|---------|----------|-------|
| A0A0D9SG96 | tr A0A0D9SG96 A0A0D9SG96_HUMAN<br>(Fragment) OS=Homo sapiens OX=9606 GN=NRXN1 PE=1 NRXN1 SV=1                                     | Neurexin-1-beta                 | 1 | 1 | 6.620%  | 14656.28 | 4.62  |
| A0A0F7WAP3 | tr A0A0F7WAP3 A0A0F7WAP3_HUMAN<br>(Fragment) OS=Homo sapiens OX=9606 GN=CALR PE=4 CALR SV=1                                       | Calreticulin                    | 1 | 1 | 13.640% | 8439     | 11.61 |
| A0A0G2JQK5 | tr A0A0G2JQK5 A0A0G2JQK5_HUMAN<br>(Fragment) OS=Homo sapiens OX=9606 GN=NXN PE=1 SV=1                                             | Nucleoredoxin NXN               | 1 | 1 | 9.170%  | 12832.4  | 5.65  |
| A0A0G2R1R6 | tr A0A0G2R1R6 A0A0G2R1R6_HUMAN<br>(Fragment) OS=Homo sapiens OX=9606 GN=HLA-DQB1 PE=4 HLA-DQB1 SV=1                               | MHC class II antigen            | 1 | 1 | 6.740%  | 10501.56 | 9.03  |
| A0A0S2Z3B0 | tr A0A0S2Z3B0 A0A0S2Z3B0_HUMAN<br>isoform 3 (Fragment) OS=Homo sapiens OX=9606 GN=ASL ASL PE=2 SV=1                               | Argininosuccinate lyase         | 1 | 1 | 4.460%  | 39788.91 | 5.87  |
| A0A0S2Z3E8 | tr A0A0S2Z3E8 A0A0S2Z3E8_HUMAN<br>(Fragment) OS=Homo sapiens OX=9606 GN=FGA PE=1 SV=1                                             | Fibrinopeptide A <sub>FGA</sub> | 1 | 1 | 1.610%  | 47384.01 | 8.55  |
| A0A0S2Z3F2 | tr A0A0S2Z3F2 A0A0S2Z3F2_HUMAN<br>3611 viral oncogene-like protein isoform 2 (Fragment) OS=Homo sapiens OX=9606 GN=ARAF PE=2 SV=1 | V-raf murine sarcoma            | 1 | 1 | 1.150%  | 67999.06 | 9.2   |
| A0A0S2Z3N8 | tr A0A0S2Z3N8 A0A0S2Z3N8_HUMAN<br>reductase isoform 4 (Fragment) OS=Homo sapiens OX=9606 GN=DHCR7 PE=2 SV=1                       | 7-dehydrocholesterol            | 1 | 1 | 4.240%  | 18221.98 | 9.47  |
| A0A0S2Z519 | tr A0A0S2Z519 A0A0S2Z519_HUMAN<br>protein X-1 isoform 5 OS=Homo sapiens OX=9606 GN=HAX1 HAX1 PE=2 SV=1                            | HCLS1 associated                | 1 | 1 | 11.290% | 7248.57  | 11.54 |
| A0A0S2Z6F0 | tr A0A0S2Z6F0 A0A0S2Z6F0_HUMAN<br>isoform 2 OS=Homo sapiens OX=9606 GN=HM13 PE=1 SV=1                                             | Histocompatibility 13 HM13      | 1 | 1 | 2.030%  | 38067.19 | 6.38  |
| A0A0U1RQR3 | tr A0A0U1RQR3 A0A0U1RQR3_HUMAN<br>(Fragment) OS=Homo sapiens OX=9606 GN=PATJ PE=1 SV=1                                            | InaD-like protein PATJ          | 1 | 1 | 5.040%  | 14913.6  | 6.81  |
| A0A125QYY8 | tr A0A125QYY8 A0A125QYY8_HUMAN<br>variable region (Fragment) OS=Homo sapiens OX=9606 PE=2 SV=1                                    | IBM-B1 light chain              | 1 | 1 | 11.610% | 12166.61 | 8.68  |
| A0A126GW78 | tr A0A126GW78 A0A126GW78_HUMAN<br>OS=Homo sapiens OX=9606 GN=OR5AC2 PE=3 SV=1                                                     | Olfactory receptor OR5AC2       | 1 | 1 | 2.270%  | 35285.93 | 9.13  |

|            |                                                                                                                                                |         |   |   |        |           |      |
|------------|------------------------------------------------------------------------------------------------------------------------------------------------|---------|---|---|--------|-----------|------|
| A0A126LB01 | tr A0A126LB01 A0A126LB01_HUMAN Protease/assembly protein OS=Homo sapiens OX=9606 GN=U53 PE=3 SV=1                                              | U53     | 1 | 1 | 0.950% | 58517.74  | 5.44 |
| A0A126LB07 | tr A0A126LB07 A0A126LB07_HUMAN Major capsid protein OS=Homo sapiens OX=9606 GN=U57 PE=3 SV=1                                                   | U57     | 1 | 1 | 1.260% | 151991.7  | 6.21 |
| A0A140VJE2 | tr A0A140VJE2 A0A140VJE2_HUMAN Testicular tissue protein Li 16 OS=Homo sapiens OX=9606 PE=2 SV=1                                               |         | 1 | 1 | 1.770% | 71157.72  | 6.55 |
| A0A140VJE6 | tr A0A140VJE6 A0A140VJE6_HUMAN Guanylate cyclase OS=Homo sapiens OX=9606 PE=2 SV=1                                                             |         | 1 | 1 | 0.470% | 118917.84 | 6.19 |
| A0A140VJJ4 | tr A0A140VJJ4 A0A140VJJ4_HUMAN Family with sequence similarity 71, member B OS=Homo sapiens OX=9606 FAM71B GN=FAM71B PE=2 SV=1                 |         | 1 | 1 | 1.160% | 64755.03  | 9.52 |
| A0A140VJZ8 | tr A0A140VJZ8 A0A140VJZ8_HUMAN Testicular tissue protein Li 225 OS=Homo sapiens OX=9606 PE=2 SV=1                                              |         | 1 | 1 | 1.120% | 102933.41 | 5.52 |
| A0A140VK57 | tr A0A140VK57 A0A140VK57_HUMAN Metalloproteinase inhibitor 2 OS=Homo sapiens OX=9606 PE=2 SV=1                                                 |         | 1 | 1 | 3.640% | 24399.02  | 7.46 |
| A0A1B0GTY9 | tr A0A1B0GTY9 A0A1B0GTY9_HUMAN Alpha-aminoadipic semialdehyde dehydrogenase OS=Homo sapiens OX=9606 ALDH7A1 GN=ALDH7A1 PE=1 SV=1               |         | 1 | 1 | 2.920% | 51853     | 8.25 |
| A0A1B0GUM1 | tr A0A1B0GUM1 A0A1B0GUM1_HUMAN Pleckstrin homology domain-containing family A member 7 (Fragment) OS=Homo sapiens OX=9606 GN=PLEKHA7 PE=1 SV=1 | PLEKHA7 | 1 | 1 | 1.930% | 58700.68  | 9.09 |
| A0A1B0GWC0 | tr A0A1B0GWC0 A0A1B0GWC0_HUMAN Carnitine O-palmitoyltransferase 2, mitochondrial OS=Homo sapiens OX=9606 GN=CPT2 PE=1 SV=1                     | CPT2    | 1 | 1 | 1.080% | 72648.77  | 8.84 |
| A0A1P0AYU5 | tr A0A1P0AYU5 A0A1P0AYU5_HUMAN Sidoreflexin OS=Homo sapiens OX=9606 GN=SFXN3 PE=1 SV=1                                                         | SFXN3   | 1 | 1 | 1.850% | 35978.49  | 9.25 |
| A0A1U9X8P6 | tr A0A1U9X8P6 A0A1U9X8P6_HUMAN TRIM26 OS=Homo sapiens OX=9606 PE=4 SV=1                                                                        |         | 1 | 1 | 2.040% | 62179.21  | 4.98 |
| A0A1U9X982 | tr A0A1U9X982 A0A1U9X982_HUMAN PRRC2A OS=Homo sapiens OX=9606 PE=4 SV=1                                                                        |         | 1 | 1 | 0.370% | 228838.29 | 9.47 |

|            |                                                                                                                                     |   |   |         |           |       |
|------------|-------------------------------------------------------------------------------------------------------------------------------------|---|---|---------|-----------|-------|
| A0A1U9XBC2 | tr A0A1U9XBC2 A0A1U9XBC2_HUMAN Mediator of DNA damage checkpoint protein 1 OS=Homo sapiens OX=9606 PE=4 SV=1                        | 1 | 1 | 0.810%  | 226642.53 | 5.38  |
| A0A1W2PP04 | tr A0A1W2PP04 A0A1W2PP04_HUMAN RNA-binding motif protein, X-linked 2 OS=Homo sapiens OX=9606 GN=RBMX2 RBMX2 PE=1 SV=1               | 1 | 1 | 3.620%  | 31522.07  | 9.45  |
| A0A1W2PPE0 | tr A0A1W2PPE0 A0A1W2PPE0_HUMAN Golgi SNAP receptor complex member 2 OS=Homo sapiens OX=9606 GN=GOSR2 GOSR2 PE=4 SV=1                | 1 | 1 | 13.640% | 7354.36   | 9.15  |
| A0A1W2PPR3 | tr A0A1W2PPR3 A0A1W2PPR3_HUMAN Elongator complex protein 4 OS=Homo sapiens OX=9606 GN=ELP4 PE=1 SV=1 ELP4                           | 1 | 1 | 9.900%  | 10403.62  | 10.51 |
| A0A1W2PQS4 | tr A0A1W2PQS4 A0A1W2PQS4_HUMAN Glial fibrillary acidic protein (Fragment) OS=Homo sapiens OX=9606 GN=GFAP GFAP PE=1 SV=1            | 1 | 1 | 32.350% | 3605.04   | 6.93  |
| A0A1W2PS79 | tr A0A1W2PS79 A0A1W2PS79_HUMAN ADP-ribosylation factor-like 9, isoform CRA_b OS=Homo sapiens OX=9606 ARL9 GN=ARL9 PE=1 SV=2         | 1 | 1 | 2.260%  | 30158.03  | 8.82  |
| A0A1X7SBU6 | tr A0A1X7SBU6 A0A1X7SBU6_HUMAN Adhesion G-protein-coupled receptor V1 (Fragment) OS=Homo sapiens OX=9606 ADGRV1 GN=ADGRV1 PE=1 SV=1 | 1 | 1 | 0.420%  | 288346.02 | 4.68  |
| A0A286LWX1 | tr A0A286LWX1 A0A286LWX1_HUMAN Aldehyde oxidase 1 OS=Homo sapiens OX=9606 GN=AOX1 PE=2 SV=1 AOX1                                    | 1 | 1 | 0.450%  | 147829.19 | 6.72  |
| A0A2R4CIF1 | tr A0A2R4CIF1 A0A2R4CIF1_HUMAN Dioxin-inducible cytochrome p450 (Fragment) OS=Homo sapiens OX=9606 CYP1B1 GN=CYP1B1 PE=3 SV=1       | 1 | 1 | 3.080%  | 21996.06  | 7.07  |
| A0A2R8Y481 | tr A0A2R8Y481 A0A2R8Y481_HUMAN Spastin (Fragment) OS=Homo sapiens OX=9606 GN=SPAST PE=1 SV=1 SPAST                                  | 1 | 1 | 2.220%  | 49610.09  | 9.31  |
| A0A2R8Y4Z8 | tr A0A2R8Y4Z8 A0A2R8Y4Z8_HUMAN Coiled-coil domain-containing protein 9 OS=Homo sapiens OX=9606 GN=CCDC9 CCDC9 PE=1 SV=1             | 1 | 1 | 1.190%  | 65306.31  | 5.22  |
| A0A2R8Y5P9 | tr A0A2R8Y5P9 A0A2R8Y5P9_HUMAN Protein Shroom3 OS=Homo sapiens OX=9606 GN=SHROOM3 PE=1 SV=1 SHROOM3                                 | 1 | 1 | 0.470%  | 208047.19 | 8.16  |
| A0A2R8YCJ0 | tr A0A2R8YCJ0 A0A2R8YCJ0_HUMAN Girdin (Fragment) OS=Homo sapiens OX=9606 GN=CCDC88A PE=4 SV=1 CCDC88A                               | 1 | 1 | 53.330% | 1577.65   | 4.09  |

|            |                                                                                                                                         |   |   |         |           |      |
|------------|-----------------------------------------------------------------------------------------------------------------------------------------|---|---|---------|-----------|------|
| A0A2R8YD35 | tr A0A2R8YD35 A0A2R8YD35_HUMAN Histone deacetylase 6 (Fragment) OS=Homo sapiens OX=9606 GN=HDAC6 PE=1 HDAC6 SV=1                        | 1 | 1 | 14.550% | 12225.97  | 4.93 |
| A0A2R8YD63 | tr A0A2R8YD63 A0A2R8YD63_HUMAN DNA topoisomerase 2-binding protein 1 OS=Homo sapiens OX=9606 GN=TOPBP1 TOPBP1 PE=1 SV=1                 | 1 | 1 | 0.530%  | 170131.04 | 6.52 |
| A0A2R8YFH3 | tr A0A2R8YFH3 A0A2R8YFH3_HUMAN Protein SERAC1 OS=Homo sapiens OX=9606 GN=SERAC1 PE=1 SV=1                                               | 1 | 1 | 1.770%  | 70471.33  | 7.07 |
| A0A2R8YFH5 | tr A0A2R8YFH5 A0A2R8YFH5_HUMAN Protein transport protein SEC23 OS=Homo sapiens OX=9606 GN=SEC23B SEC23B PE=1 SV=1                       | 1 | 1 | 1.600%  | 84471.91  | 6.54 |
| A0A2S1ZR87 | tr A0A2S1ZR87 A0A2S1ZR87_HUMAN Structural maintenance of chromosomes 6 OS=Homo sapiens OX=9606 GN=SMC6 SMC6 PE=2 SV=1                   | 1 | 1 | 0.820%  | 126324.16 | 6.57 |
| A0A2U3TZV9 | tr A0A2U3TZV9 A0A2U3TZV9_HUMAN Girdin OS=Homo sapiens OX=9606 GN=CCDC88A PE=1 SV=1                                                      | 1 | 1 | 0.390%  | 207881.98 | 5.73 |
| A0A2U8BR37 | tr A0A2U8BR37 A0A2U8BR37_HUMAN SR-related CTD associated factor 1 transcript variant 4 OS=Homo sapiens SCAF1 OX=9606 GN=SCAF1 PE=2 SV=1 | 1 | 1 | 1.370%  | 39836.67  | 8.88 |
| A0A2X0SFX5 | tr A0A2X0SFX5 A0A2X0SFX5_HUMAN ARHGEF16 (Fragment) OS=Homo sapiens OX=9606 GN=ARHGEF16 ARHGEF16 PE=4 SV=1                               | 1 | 1 | 1.550%  | 80330.35  | 6.9  |
| A0A2X0SSL3 | tr A0A2X0SSL3 A0A2X0SSL3_HUMAN FARP2 (Fragment) OS=Homo sapiens OX=9606 GN=FARP2 PE=4 SV=1                                              | 1 | 1 | 1.330%  | 120113.36 | 8.96 |
| A0A343GKA1 | tr A0A343GKA1 A0A343GKA1_HUMAN NADH-ubiquinone oxidoreductase chain 4 OS=Homo sapiens OX=9606 GN=ND4 ND4 PE=3 SV=1                      | 1 | 1 | 2.180%  | 50208.73  | 9.4  |
| A0A384MEG1 | tr A0A384MEG1 A0A384MEG1_HUMAN Fascin OS=Homo sapiens OX=9606 PE=2 SV=1                                                                 | 1 | 1 | 3.250%  | 54529.35  | 6.84 |
| A0A384N6B9 | tr A0A384N6B9 A0A384N6B9_HUMAN Epididymis secretory sperm binding protein OS=Homo sapiens OX=9606 PE=2 SV=1                             | 1 | 1 | 3.550%  | 38650.74  | 6.33 |
| A0A3B3ITX7 | tr A0A3B3ITX7 A0A3B3ITX7_HUMAN Acylglycerol kinase, mitochondrial OS=Homo sapiens OX=9606 GN=AGK PE=1 AGK SV=1                          | 1 | 1 | 6.070%  | 23422.87  | 9.05 |

|            |                                                                                                                                                     |   |   |         |           |      |
|------------|-----------------------------------------------------------------------------------------------------------------------------------------------------|---|---|---------|-----------|------|
| A0A494C0E5 | tr A0A494C0E5 A0A494C0E5_HUMAN<br>Matrix metalloproteinase-21 (Fragment) OS=Homo sapiens OX=9606 MMP21 GN=MMP21 PE=4 SV=1                           | 1 | 1 | 7.140%  | 9197.23   | 6.56 |
| A0A494C0S9 | tr A0A494C0S9 A0A494C0S9_HUMAN C3 and PZP-like alpha-2-macroglobulin domain-containing protein 8 OS=Homo sapiens CPAMD8 OX=9606 GN=CPAMD8 PE=1 SV=1 | 1 | 1 | 0.310%  | 211282.69 | 6.16 |
| A0A494C142 | tr A0A494C142 A0A494C142_HUMAN BRCA1-associated RING domain protein 1 (Fragment) OS=Homo sapiens OX=9606 BARD1 GN=BARD1 PE=1 SV=1                   | 1 | 1 | 1.390%  | 47645.72  | 9.15 |
| A0A494C1T7 | tr A0A494C1T7 A0A494C1T7_HUMAN Protein kinase C delta type (Fragment) OS=Homo sapiens OX=9606 GN=PRKCD PRKCD PE=1 SV=1                              | 1 | 1 | 1.690%  | 33662.69  | 8.89 |
| A0A4D6J698 | tr A0A4D6J698 A0A4D6J698_HUMAN Mena delta 11a OS=Homo sapiens OX=9606 PE=2 SV=1                                                                     | 1 | 1 | 3.860%  | 63923.68  | 6.12 |
| A0A590UJ94 | tr A0A590UJ94 A0A590UJ94_HUMAN Unconventional myosin-VIIa (Fragment) OS=Homo sapiens OX=9606 GN=MYO7A MYO7A PE=1 SV=1                               | 1 | 1 | 0.560%  | 123258.8  | 9.11 |
| A0A590UJD6 | tr A0A590UJD6 A0A590UJD6_HUMAN Egl nine homolog 1 (Fragment) OS=Homo sapiens OX=9606 GN=EGLN1 PE=1 EGLN1 SV=1                                       | 1 | 1 | 8.640%  | 8806.95   | 8.64 |
| A0A590UJN8 | tr A0A590UJN8 A0A590UJN8_HUMAN DNA mismatch repair protein Msh3 OS=Homo sapiens OX=9606 GN=MSH3 PE=1 MSH3 SV=1                                      | 1 | 1 | 0.840%  | 119735.36 | 6.8  |
| A0A590UJY2 | tr A0A590UJY2 A0A590UJY2_HUMAN Guanine nucleotide-binding protein G(s) subunit alpha isoforms short OS=Homo sapiens OX=9606 GN=GNAS PE=1 SV=1       | 1 | 1 | 2.950%  | 27931.57  | 7.6  |
| A0A5C2FSX6 | tr A0A5C2FSX6 A0A5C2FSX6_HUMAN IGL c18_light_IGKV1-5_IGKJ1 (Fragment) OS=Homo sapiens OX=9606 PE=2 SV=1                                             | 1 | 1 | 7.480%  | 11736.96  | 8.66 |
| A0A5C2FVY3 | tr A0A5C2FVY3 A0A5C2FVY3_HUMAN IGL c1171_light_IGKV3-11_IGKJ4 (Fragment) OS=Homo sapiens OX=9606 PE=2 SV=1                                          | 1 | 1 | 7.480%  | 11757.08  | 8.7  |
| A0A5C2FXS1 | tr A0A5C2FXS1 A0A5C2FXS1_HUMAN IGL c1434_light_IGKV1-12_IGKJ1 (Fragment) OS=Homo sapiens OX=9606 PE=2 SV=1                                          | 1 | 1 | 14.950% | 11557.89  | 9.07 |
| A0A5C2FXT9 | tr A0A5C2FXT9 A0A5C2FXT9_HUMAN IGL c435_light_IGKV1D-39_IGKJ1 (Fragment) OS=Homo sapiens OX=9606 PE=2 SV=1                                          | 1 | 1 | 14.950% | 11533.74  | 9.3  |

|            |                                                                                                            |                                            |   |   |         |          |      |
|------------|------------------------------------------------------------------------------------------------------------|--------------------------------------------|---|---|---------|----------|------|
| A0A5C2FYN4 | tr A0A5C2FYN4 A0A5C2FYN4_HUMAN<br>c1340_light_IGKV1-17_IGKJ1 (Fragment)<br>OX=9606 PE=2 SV=1               | IGL<br>OS=Homo sapiens                     | 1 | 1 | 14.020% | 11716.03 | 9.01 |
| A0A5C2G0Z7 | tr A0A5C2G0Z7 A0A5C2G0Z7_HUMAN<br>c1605_light_IGKV3-15_IGKJ2 (Fragment)<br>OX=9606 PE=2 SV=1               | IGL<br>OS=Homo sapiens                     | 1 | 1 | 7.410%  | 11653.85 | 8.07 |
| A0A5C2G171 | tr A0A5C2G171 A0A5C2G171_HUMAN<br>c2899_light_IGKV1-39_IGKJ1 (Fragment)<br>OX=9606 PE=2 SV=1               | IGL<br>OS=Homo sapiens                     | 1 | 1 | 14.810% | 11843.13 | 8.68 |
| A0A5C2G4Y6 | tr A0A5C2G4Y6 A0A5C2G4Y6_HUMAN<br>c2597_light_IGKV1-27_IGKJ2 (Fragment)<br>OX=9606 PE=2 SV=1               | IGL<br>OS=Homo sapiens                     | 1 | 1 | 14.950% | 11421.7  | 8.98 |
| A0A5C2G5L1 | tr A0A5C2G5L1 A0A5C2G5L1_HUMAN<br>c7_heavy_IGHV3-30_IGHD3-22_IGHJ4<br>OS=Homo sapiens OX=9606 PE=2 SV=1    | IGH<br>(Fragment)<br>OS=Homo sapiens       | 1 | 1 | 9.170%  | 13313.79 | 8.62 |
| A0A5C2G606 | tr A0A5C2G606 A0A5C2G606_HUMAN<br>c389_heavy_IGHV4-39_IGHD6-25_IGHJ4<br>OS=Homo sapiens OX=9606 PE=2 SV=1  | IGH<br>(Fragment)<br>OS=Homo sapiens       | 1 | 1 | 5.040%  | 12815.13 | 7.94 |
| A0A5C2G6P5 | tr A0A5C2G6P5 A0A5C2G6P5_HUMAN<br>c609_heavy_IGHV5-51_IGHD3-9_IGHJ5<br>OS=Homo sapiens OX=9606 PE=2 SV=1   | IGH<br>(Fragment)<br>OS=Homo sapiens       | 1 | 1 | 15.200% | 13959.4  | 7    |
| A0A5C2G781 | tr A0A5C2G781 A0A5C2G781_HUMAN<br>c3567_light_IGKV1-39_IGKJ2 (Fragment)<br>OX=9606 PE=2 SV=1               | IGL<br>OS=Homo sapiens                     | 1 | 1 | 14.950% | 11472.57 | 7.95 |
| A0A5C2G8H9 | tr A0A5C2G8H9 A0A5C2G8H9_HUMAN<br>c2753_light_IGKV3-20_IGKJ1 (Fragment)<br>OX=9606 PE=2 SV=1               | IGL<br>OS=Homo sapiens                     | 1 | 1 | 8.330%  | 11677.87 | 8.08 |
| A0A5C2G9I2 | tr A0A5C2G9I2 A0A5C2G9I2_HUMAN<br>c12_light_IGKV3-11_IGKJ2 (Fragment)<br>OS=Homo sapiens OX=9606 PE=2 SV=1 | IGL<br>OS=Homo sapiens                     | 1 | 1 | 7.340%  | 12064.43 | 8.7  |
| A0A5C2GA72 | tr A0A5C2GA72 A0A5C2GA72_HUMAN<br>c165_heavy_IGHV4-34_IGHD3-10_IGHJ4<br>OS=Homo sapiens OX=9606 PE=2 SV=1  | IGH<br>(Fragment)<br>OS=Homo sapiens       | 1 | 1 | 7.200%  | 13892.37 | 8.91 |
| A0A5C2GAL3 | tr A0A5C2GAL3 A0A5C2GAL3_HUMAN<br>c296_heavy_IGHV3-33_IGHD3-3_IGHJ6<br>OS=Homo sapiens OX=9606 PE=2 SV=1   | IGH + IGL<br>(Fragment)<br>OS=Homo sapiens | 1 | 1 | 9.090%  | 13513.02 | 8.49 |
| A0A5C2GB35 | tr A0A5C2GB35 A0A5C2GB35_HUMAN<br>c416_light_IGKV3-15_IGKJ1 (Fragment)<br>OX=9606 PE=2 SV=1                | IGH + IGL<br>(Fragment)<br>OS=Homo sapiens | 1 | 1 | 17.590% | 11874.19 | 8.74 |



|            |                                                                                                            |                         |   |   |         |          |      |
|------------|------------------------------------------------------------------------------------------------------------|-------------------------|---|---|---------|----------|------|
| A0A5C2GBI6 | tr A0A5C2GBI6 A0A5C2GBI6_HUMAN<br>c551_heavy_IGHV4-34_IGHD5-18_IGHJ4<br>OS=Homo sapiens OX=9606 PE=2 SV=1  | IGH + IGL<br>(Fragment) | 1 | 1 | 11.570% | 13338.81 | 7.99 |
| A0A5C2GDJ7 | tr A0A5C2GDJ7 A0A5C2GDJ7_HUMAN<br>c170_light_IGKV3-11_IGKJ5<br>OS=Homo sapiens OX=9606 PE=2 SV=1           | IGH + IGL<br>(Fragment) | 1 | 1 | 14.950% | 11565.77 | 6.86 |
| A0A5C2GFC9 | tr A0A5C2GFC9 A0A5C2GFC9_HUMAN<br>c153_heavy_IGHV3-23_IGHD1-7_IGHJ4<br>OS=Homo sapiens OX=9606 PE=2 SV=1   | IG<br>(Fragment)        | 1 | 1 | 18.330% | 12852.14 | 6.85 |
| A0A5C2GFK2 | tr A0A5C2GFK2 A0A5C2GFK2_HUMAN<br>c360_heavy_IGHV4-31_IGHD4-4_IGHJ5<br>OS=Homo sapiens OX=9606 PE=2 SV=1   | IG<br>(Fragment)        | 1 | 1 | 5.790%  | 13162.5  | 9.18 |
| A0A5C2GH22 | tr A0A5C2GH22 A0A5C2GH22_HUMAN<br>c1145_light_IGKV2-30_IGKJ3<br>OS=Homo sapiens OX=9606 PE=2 SV=1          | IG<br>(Fragment)        | 1 | 1 | 6.250%  | 12331.73 | 9.62 |
| A0A5C2GJU4 | tr A0A5C2GJU4 A0A5C2GJU4_HUMAN<br>c287_light_IGKV1-8_IGKJ1<br>OS=Homo sapiens OX=9606 PE=2 SV=1            | IGH + IGL<br>(Fragment) | 1 | 1 | 14.950% | 11710.93 | 9.1  |
| A0A5C2GKE5 | tr A0A5C2GKE5 A0A5C2GKE5_HUMAN<br>c125_light_IGKV3-11_IGKJ4<br>OS=Homo sapiens OX=9606 PE=2 SV=1           | IG<br>(Fragment)        | 1 | 1 | 7.410%  | 11518.79 | 8.07 |
| A0A5C2GKS6 | tr A0A5C2GKS6 A0A5C2GKS6_HUMAN<br>c155_heavy_IGHV1-2_IGHD7-27_IGHJ5<br>OS=Homo sapiens OX=9606 PE=2 SV=1   | IG<br>(Fragment)        | 1 | 1 | 10.570% | 13483.77 | 4.9  |
| A0A5C2GKZ8 | tr A0A5C2GKZ8 A0A5C2GKZ8_HUMAN<br>c192_heavy_IGHV4-61_IGHD3-10_IGHJ6<br>OS=Homo sapiens OX=9606 PE=2 SV=1  | IG<br>(Fragment)        | 1 | 1 | 4.880%  | 13517.82 | 8.56 |
| A0A5C2GR10 | tr A0A5C2GR10 A0A5C2GR10_HUMAN<br>c1154_heavy_IGHV3-66_IGHD3-16_IGHJ6<br>OS=Homo sapiens OX=9606 PE=2 SV=1 | IG<br>(Fragment)        | 1 | 1 | 4.000%  | 13612.01 | 7.93 |
| A0A5C2GSP8 | tr A0A5C2GSP8 A0A5C2GSP8_HUMAN<br>c1510_heavy_IGHV3-7_IGHD5-12_IGHJ4<br>OS=Homo sapiens OX=9606 PE=2 SV=1  | IG<br>(Fragment)        | 1 | 1 | 10.570% | 13326.93 | 8.9  |
| A0A5C2GU88 | tr A0A5C2GU88 A0A5C2GU88_HUMAN<br>c1084_light_IGLV2-23_IGLJ2<br>OS=Homo sapiens OX=9606 PE=2 SV=1          | IG<br>(Fragment)        | 1 | 1 | 7.270%  | 11255.19 | 7.96 |
| A0A5C2GXB2 | tr A0A5C2GXB2 A0A5C2GXB2_HUMAN<br>c1079_light_IGKV3-20_IGKJ2<br>OS=Homo sapiens OX=9606 PE=2 SV=1          | IG<br>(Fragment)        | 1 | 1 | 7.410%  | 11834.04 | 6.06 |

|            |                                                                                                                                                           |   |   |         |           |      |
|------------|-----------------------------------------------------------------------------------------------------------------------------------------------------------|---|---|---------|-----------|------|
| A0A669KB49 | tr A0A669KB49 A0A669KB49_HUMAN Msx2-interacting protein (Fragment) OS=Homo sapiens OX=9606 GN=SPEN PE=1 SPEN SV=1                                         | 1 | 1 | 1.140%  | 81280     | 8.76 |
| A0A669KB83 | tr A0A669KB83 A0A669KB83_HUMAN Alpha-galactosidase (Fragment) OS=Homo sapiens OX=9606 GN=GLA PE=1 SV=1 GLA                                                | 1 | 1 | 3.520%  | 22365.8   | 4.74 |
| A0A6B9DHC0 | tr A0A6B9DHC0 A0A6B9DHC0_HUMAN MHC class II antigen (Fragment) OS=Homo sapiens OX=9606 GN=DPA1 PE=3 SV=1 DPA1                                             | 1 | 1 | 3.690%  | 24573.56  | 4.69 |
| A0A6H0MUP3 | tr A0A6H0MUP3 A0A6H0MUP3_HUMAN NADH-ubiquinone oxidoreductase chain 1 OS=Homo sapiens OX=9606 GN=ND1 ND1 PE=3 SV=1                                        | 1 | 1 | 1.570%  | 34715.1   | 6.11 |
| A0A6I8PRT6 | tr A0A6I8PRT6 A0A6I8PRT6_HUMAN Glutamine--fructose-6-phosphate aminotransferase [isomerizing] 1 OS=Homo sapiens GFPT1 OX=9606 GN=GFPT1 PE=1 SV=1          | 1 | 1 | 14.040% | 6765.73   | 9.36 |
| A0A6I8PRV8 | tr A0A6I8PRV8 A0A6I8PRV8_HUMAN Cadherin EGF LAG seven-pass G-type receptor 1 (Fragment) OS=Homo sapiens CELSR1 OX=9606 GN=CELSR1 PE=1 SV=1                | 1 | 1 | 1.830%  | 34610.9   | 7.37 |
| A0A6M4C8X9 | tr A0A6M4C8X9 A0A6M4C8X9_HUMAN Docking protein 3 OS=Homo sapiens OX=9606 GN=DOK3 PE=4 SV=1 DOK3                                                           | 1 | 1 | 4.390%  | 24736.77  | 8.54 |
| A0A6Q8PFE7 | tr A0A6Q8PFE7 A0A6Q8PFE7_HUMAN Heat shock protein beta-1 OS=Homo sapiens OX=9606 GN=HSPB1 PE=1 SV=1 HSPB1                                                 | 1 | 1 | 8.200%  | 13827.43  | 6.83 |
| A0A6Q8PGX2 | tr A0A6Q8PGX2 A0A6Q8PGX2_HUMAN DNA-binding protein SMUBP-2 OS=Homo sapiens OX=9606 GN=IGHMBP2 PE=1 IGHMBP2 SV=1                                           | 1 | 1 | 2.800%  | 51105.89  | 8.61 |
| A0A6Q8PH17 | tr A0A6Q8PH17 A0A6Q8PH17_HUMAN Sodium/potassium-transporting ATPase subunit beta-1-interacting protein NKAIN3 OS=Homo sapiens OX=9606 GN=NKAIN3 PE=1 SV=1 | 1 | 1 | 7.290%  | 28089.64  | 6.73 |
| A0A6Q8PHM1 | tr A0A6Q8PHM1 A0A6Q8PHM1_HUMAN Myelin regulatory factor (Fragment) OS=Homo sapiens OX=9606 GN=MYRF MYRF PE=1 SV=1                                         | 1 | 1 | 0.530%  | 101784.46 | 8.94 |
| A0A7I2RAZ6 | tr A0A7I2RAZ6 A0A7I2RAZ6_HUMAN C-myc promoter-binding protein OS=Homo sapiens OX=9606 GN=DENND4A PE=1 DENND4A SV=1                                        | 1 | 1 | 0.260%  | 213772.47 | 6.7  |
| A0A7I2V3K7 | tr A0A7I2V3K7 A0A7I2V3K7_HUMAN DnaJ homolog subfamily B member 1 OS=Homo sapiens OX=9606 GN=DNAJB1 PE=1 DNAJB1 SV=1                                       | 1 | 1 | 2.560%  | 30184.22  | 8.97 |

|            |                                                                                                                                            |                   |   |   |         |           |      |
|------------|--------------------------------------------------------------------------------------------------------------------------------------------|-------------------|---|---|---------|-----------|------|
| A0A7I2V3V7 | tr A0A7I2V3V7 A0A7I2V3V7_HUMAN Synaptobrevin homolog<br>YKT6 OS=Homo sapiens OX=9606 GN=YKT6 PE=1 SV=1                                     | YKT6              | 1 | 1 | 2.400%  | 27815.68  | 7    |
| A0A7I2V3X2 | tr A0A7I2V3X2 A0A7I2V3X2_HUMAN Acyl-coenzyme A oxidase<br>OS=Homo sapiens OX=9606 GN=ACOXL PE=1 SV=1                                       | ACOXL             | 1 | 1 | 1.800%  | 68823.84  | 9.08 |
| A0A7I2V5H2 | tr A0A7I2V5H2 A0A7I2V5H2_HUMAN Pitrilysin<br>metalloproteinase 1 OS=Homo sapiens OX=9606 GN=PITRM1 PITRM1<br>PE=1 SV=1                     | PITRM1            | 1 | 1 | 0.700%  | 112814.97 | 6.22 |
| A0A7I2V5P9 | tr A0A7I2V5P9 A0A7I2V5P9_HUMAN Eukaryotic translation<br>initiation factor 3 subunit E OS=Homo sapiens OX=9606 EIF3E<br>GN=EIF3E PE=1 SV=1 | EIF3E             | 1 | 1 | 2.100%  | 39189.46  | 6.33 |
| A0A7P0T7Z8 | tr A0A7P0T7Z8 A0A7P0T7Z8_HUMAN Joubertin OS=Homo<br>sapiens OX=9606 GN=AH11 PE=1 SV=1                                                      | AH11              | 1 | 1 | 0.760%  | 135610.05 | 6.63 |
| A0A7P0T8I3 | tr A0A7P0T8I3 A0A7P0T8I3_HUMAN UPF0688 protein<br>C1orf174 OS=Homo sapiens OX=9606 GN=C1orf174 PE=1 C1orf174<br>SV=1                       | C1orf174          | 1 | 1 | 5.710%  | 11280.72  | 9.64 |
| A0A7S5BYA5 | tr A0A7S5BYA5 A0A7S5BYA5_HUMAN IGH<br>c476_heavy_IGHV3-73_IGHD4-17_IGHJ5 (Fragment)<br>OS=Homo sapiens OX=9606 PE=2 SV=1                   | IGH<br>(Fragment) | 1 | 1 | 7.500%  | 12793.17  | 8.07 |
| A0A7S5C089 | tr A0A7S5C089 A0A7S5C089_HUMAN IGH<br>c1798_heavy_IGHV4-39_IGHD6-19_IGHJ3 (Fragment)<br>OS=Homo sapiens OX=9606 PE=2 SV=1                  | IGH<br>(Fragment) | 1 | 1 | 6.610%  | 13057.51  | 7.93 |
| A0A7S5C0A0 | tr A0A7S5C0A0 A0A7S5C0A0_HUMAN IGH<br>c1823_heavy_IGHV4-39_IGHD2-21_IGHJ5 (Fragment)<br>OS=Homo sapiens OX=9606 PE=2 SV=1                  | IGH<br>(Fragment) | 1 | 1 | 13.560% | 13216.73  | 7.96 |
| A0A7S5C0L7 | tr A0A7S5C0L7 A0A7S5C0L7_HUMAN IGH<br>c934_heavy_IGHV3-48_IGHD5-12_IGHJ4 (Fragment)<br>OS=Homo sapiens OX=9606 PE=2 SV=1                   | IGH<br>(Fragment) | 1 | 1 | 17.740% | 13656.98  | 4.62 |
| A0A7S5C127 | tr A0A7S5C127 A0A7S5C127_HUMAN IGH<br>c2263_heavy_IGHV1-69_IGHD3-9_IGHJ6 (Fragment)<br>OS=Homo sapiens OX=9606 PE=2 SV=1                   | IGH<br>(Fragment) | 1 | 1 | 6.750%  | 17501.41  | 9.33 |
| A0A7S5C1H7 | tr A0A7S5C1H7 A0A7S5C1H7_HUMAN IGH<br>c10_heavy_IGHV1-2_IGHD2-2_IGHJ4 (Fragment) OS=Homo<br>sapiens OX=9606 PE=2 SV=1                      | IGH<br>(Fragment) | 1 | 1 | 11.400% | 12649.08  | 9.33 |
| A0A7S5C2W0 | tr A0A7S5C2W0 A0A7S5C2W0_HUMAN IGH<br>c2360_heavy_IGHV1-69_IGHD6-19_IGHJ4 (Fragment)<br>OS=Homo sapiens OX=9606 PE=2 SV=1                  | IGH<br>(Fragment) | 1 | 1 | 11.570% | 12851.28  | 7.97 |

|            |                                                                                                                                        |                   |   |   |         |           |      |
|------------|----------------------------------------------------------------------------------------------------------------------------------------|-------------------|---|---|---------|-----------|------|
| A0A7S5EU20 | tr A0A7S5EU20 A0A7S5EU20_HUMAN<br>c1456_heavy_IGHV4-34_IGHD2-8_IGHJ4<br>OS=Homo sapiens OX=9606 PE=2 SV=1                              | IGH<br>(Fragment) | 1 | 1 | 11.850% | 15236.02  | 8.96 |
| A0A7S5EUG8 | tr A0A7S5EUG8 A0A7S5EUG8_HUMAN<br>c2146_heavy_IGHV4-39_IGHD3-10_IGHJ2<br>OS=Homo sapiens OX=9606 PE=2 SV=1                             | IGH<br>(Fragment) | 1 | 1 | 9.760%  | 13356.95  | 9.43 |
| A0A7S5EX76 | tr A0A7S5EX76 A0A7S5EX76_HUMAN<br>c1949_heavy_IGHV3-15_IGHD1-26_IGHJ3<br>OS=Homo sapiens OX=9606 PE=2 SV=1                             | IGH<br>(Fragment) | 1 | 1 | 15.570% | 12979.41  | 8.66 |
| A0A7T0LN63 | tr A0A7T0LN63 A0A7T0LN63_HUMAN<br>Immunoglobulin heavy chain variable region (Fragment)<br>OS=Homo sapiens OX=9606 PE=2 SV=1           |                   | 1 | 1 | 4.100%  | 13431.76  | 9.26 |
| A0A804CL36 | tr A0A804CL36 A0A804CL36_HUMAN<br>Cullin-4B OS=Homo sapiens OX=9606 GN=CUL4B PE=4 SV=1                                                 | CUL4B             | 1 | 1 | 0.950%  | 96263     | 7.55 |
| A0A804HIM6 | tr A0A804HIM6 A0A804HIM6_HUMAN<br>Histone-lysine N-methyltransferase 2C (Fragment)<br>OS=Homo sapiens OX=9606 KMT2C GN=KMT2C PE=4 SV=1 |                   | 1 | 1 | 0.380%  | 172563.92 | 5.92 |
| A0A804HJ97 | tr A0A804HJ97 A0A804HJ97_HUMAN<br>Beta-hexosaminidase subunit alpha<br>OS=Homo sapiens OX=9606 GN=HEXA PE=4 HEXA SV=1                  |                   | 1 | 1 | 3.110%  | 29123.76  | 5.96 |
| A1A4B9     | tr A1A4B9 A1A4B9_HUMAN<br>CLMN protein (Fragment)<br>OS=Homo sapiens OX=9606 GN=CLMN PE=2 SV=1                                         | CLMN              | 1 | 1 | 1.470%  | 74987.57  | 4.68 |
| A1LMA8     | tr A1LMA8 A1LMA8_HUMAN<br>Contactin 6, isoform CRA_a<br>OS=Homo sapiens OX=9606 GN=CNTN6 PE=4 SV=1                                     | CRA_a<br>CNTN6    | 1 | 1 | 0.580%  | 113954.81 | 5.73 |
| A2NUW5     | tr A2NUW5 A2NUW5_HUMAN<br>T-cell gamma protein (Fragment)<br>OS=Homo sapiens OX=9606 PE=1 SV=1                                         |                   | 1 | 1 | 6.020%  | 15177.12  | 9.14 |
| A2RRN2     | tr A2RRN2 A2RRN2_HUMAN<br>CAPS2 protein OS=Homo sapiens OX=9606 GN=CAPS2 PE=2 SV=1                                                     | CAPS2             | 1 | 1 | 3.430%  | 23448.35  | 5.38 |
| A2RUF7     | tr A2RUF7 A2RUF7_HUMAN<br>Phosphatidylinositol-4-phosphate 3-kinase<br>OS=Homo sapiens OX=9606 GN=PIK3C2B PE=2 PIK3C2B SV=1            |                   | 1 | 1 | 0.430%  | 184765.71 | 6.95 |
| A4D0Z4     | tr A4D0Z4 A4D0Z4_HUMAN<br>GRIP and coiled-coil domain containing 1<br>OS=Homo sapiens OX=9606 GN=GCC1 PE=4 GCC1 SV=1                   |                   | 1 | 1 | 0.900%  | 87809.63  | 5.35 |

|        |                                                                                                                                                                                                        |          |   |   |        |           |      |
|--------|--------------------------------------------------------------------------------------------------------------------------------------------------------------------------------------------------------|----------|---|---|--------|-----------|------|
| A4D1P7 | tr A4D1P7 A4D1P7_HUMAN Ribonuclease H OS=Homo sapiens OX=9606 GN=KIAA1466 PE=4 SV=1                                                                                                                    | KIAA1466 | 1 | 1 | 1.050% | 53489.46  | 9.2  |
| A5YM41 | tr A5YM41 A5YM41_HUMAN MTSS1 protein OS=Homo sapiens OX=9606 GN=MTSS1 PE=2 SV=1                                                                                                                        | MTSS1    | 1 | 1 | 0.960% | 79080.3   | 6.01 |
| A6NDF3 | tr A6NDF3 A6NDF3_HUMAN Protein PBDC1 OS=Homo sapiens OX=9606 GN=PBDC1 PE=1 SV=2                                                                                                                        | PBDC1    | 1 | 1 | 3.450% | 26643.55  | 9.38 |
| A6NNK5 | tr A6NNK5 A6NNK5_HUMAN TP53-binding protein 1 OS=Homo sapiens OX=9606 GN=TP53BP1 PE=1 SV=2                                                                                                             | TP53BP1  | 1 | 1 | 0.360% | 209017    | 4.58 |
| A8K0P8 | tr A8K0P8 A8K0P8_HUMAN U3 small nucleolar RNA-associated protein 25 homolog OS=Homo sapiens OX=9606 PE=2 SV=1                                                                                          |          | 1 | 1 | 1.060% | 87055.92  | 5.49 |
| A8K4W5 | tr A8K4W5 A8K4W5_HUMAN cDNA FLJ76813, highly similar to Homo sapiens acetyl-Coenzyme A acetyltransferase 2 (acetoacetyl Coenzyme A thiolase), mRNA OS=Homo sapiens OX=9606 PE=2 SV=1                   |          | 1 | 1 | 2.770% | 41378.44  | 6.47 |
| A8K5C4 | tr A8K5C4 A8K5C4_HUMAN cDNA FLJ76290, highly similar to Homo sapiens TIA1 cytotoxic granule-associated RNA bindingprotein-like 1 (TIAL1), transcript variant 1, mRNA OS=Homo sapiens OX=9606 PE=2 SV=1 |          | 1 | 1 | 2.930% | 41576.22  | 7.62 |
| A8K5W7 | tr A8K5W7 A8K5W7_HUMAN Isoleucyl-tRNA synthetase OS=Homo sapiens OX=9606 PE=2 SV=1                                                                                                                     |          | 1 | 1 | 0.850% | 105939.31 | 6.01 |
| A8K5Y7 | tr A8K5Y7 A8K5Y7_HUMAN cDNA FLJ78655, highly similar to Homo sapiens exportin 5 (XPO5), mRNA OS=Homo sapiens OX=9606 PE=2 SV=1                                                                         |          | 1 | 1 | 0.830% | 136308.83 | 5.63 |
| A8K6Q9 | tr A8K6Q9 A8K6Q9_HUMAN cDNA FLJ75882, highly similar to Homo sapiens spastic paraplegia 20, spartin (Troyer syndrome) (SPG20), mRNA OS=Homo sapiens OX=9606 PE=2 SV=1                                  |          | 1 | 1 | 1.800% | 72831.17  | 5.72 |
| A8K732 | tr A8K732 A8K732_HUMAN cDNA FLJ78771, highly similar to Homo sapiens discs, large homolog 7 (Drosophila), mRNA OS=Homo sapiens OX=9606 PE=2 SV=1                                                       |          | 1 | 1 | 1.770% | 95129.92  | 9.11 |
| A8K7A2 | tr A8K7A2 A8K7A2_HUMAN cDNA FLJ78084, highly similar to Homo sapiens cell division cycle associated 8, mRNA OS=Homo sapiens OX=9606 PE=2 SV=1                                                          |          | 1 | 1 | 3.210% | 31310.54  | 9.88 |

|        |                                                                                                                                                                     |   |   |        |           |      |
|--------|---------------------------------------------------------------------------------------------------------------------------------------------------------------------|---|---|--------|-----------|------|
| A8K7W3 | tr A8K7W3 A8K7W3_HUMAN cDNA FLJ75780, highly similar to Homo sapiens SGT1, suppressor of G2 allele of SKP1 (SUGT1), mRNA OS=Homo sapiens OX=9606 PE=2 SV=1          | 1 | 1 | 3.600% | 37833.13  | 5.06 |
| A8K897 | tr A8K897 A8K897_HUMAN Nuclear pore complex protein Nup93 OS=Homo sapiens OX=9606 PE=2 SV=1                                                                         | 1 | 1 | 1.340% | 93381.11  | 5.54 |
| A8K8W7 | tr A8K8W7 A8K8W7_HUMAN Hormone-sensitive lipase OS=Homo sapiens OX=9606 PE=2 SV=1                                                                                   | 1 | 1 | 0.840% | 116582.53 | 6.25 |
| A8K9T9 | tr A8K9T9 A8K9T9_HUMAN Formylglycinamide ribonucleotide amidotransferase OS=Homo sapiens OX=9606 PE=2 SV=1                                                          | 1 | 1 | 0.820% | 144641.61 | 5.52 |
| B1AK63 | tr B1AK63 B1AK63_HUMAN Chromatin modification-related protein MEAF6 OS=Homo sapiens OX=9606 GN=MEAF6 PE=1 MEAF6 SV=1                                                | 1 | 1 | 4.140% | 19163.78  | 9.05 |
| B1AK87 | tr B1AK87 B1AK87_HUMAN F-actin-capping protein subunit beta OS=Homo sapiens OX=9606 GN=CAPZB PE=1 SV=2 CAPZB                                                        | 1 | 1 | 3.690% | 27439.79  | 5.33 |
| B2R748 | tr B2R748 B2R748_HUMAN Interleukin-1 receptor-associated kinase-like 2 OS=Homo sapiens OX=9606 PE=2 SV=1                                                            | 1 | 1 | 1.020% | 65255.74  | 5.7  |
| B2R7U5 | tr B2R7U5 B2R7U5_HUMAN cDNA, FLJ93607 OS=Homo sapiens OX=9606 PE=2 SV=1                                                                                             | 1 | 1 | 3.230% | 21355.63  | 7.59 |
| B2R886 | tr B2R886 B2R886_HUMAN Dendritic cell-derived ubiquitin-like protein, isoform CRA_a OS=Homo sapiens OX=9606 GN=DC-DC-UbP UbP PE=1 SV=1                              | 1 | 1 | 2.630% | 21548.17  | 5.17 |
| B2RAQ9 | tr B2RAQ9 B2RAQ9_HUMAN Proteasome subunit beta OS=Homo sapiens OX=9606 PE=2 SV=1                                                                                    | 1 | 1 | 4.330% | 29931.09  | 7.58 |
| B2RB99 | tr B2RB99 B2RB99_HUMAN Replication termination factor 2 OS=Homo sapiens OX=9606 PE=2 SV=1                                                                           | 1 | 1 | 2.290% | 33798.16  | 8.87 |
| B2RD60 | tr B2RD60 B2RD60_HUMAN cDNA, FLJ96471, highly similar to Homo sapiens GABA(A) receptor-associated protein like 1(GABARAPL1), mRNA OS=Homo sapiens OX=9606 PE=2 SV=1 | 1 | 1 | 5.980% | 14071.9   | 8.69 |

|        |                                                                                                                                                                                               |   |   |         |           |       |
|--------|-----------------------------------------------------------------------------------------------------------------------------------------------------------------------------------------------|---|---|---------|-----------|-------|
| B2RDG4 | tr B2RDG4 B2RDG4_HUMAN cDNA, FLJ96597 OS=Homo sapiens OX=9606 PE=2 SV=1                                                                                                                       | 1 | 1 | 3.540%  | 57432.28  | 8.9   |
| B2RNG4 | tr B2RNG4 B2RNG4_HUMAN RING-type E3 ubiquitin transferase OS=Homo sapiens OX=9606 GN=TRIM6-TRIM34 TRIM6-TRIM PE=2 SV=1                                                                        | 1 | 1 | 0.950%  | 97728.26  | 7.89  |
| B2RWN9 | tr B2RWN9 B2RWN9_HUMAN DOPEY1 protein OS=Homo sapiens OX=9606 GN=DOPEY1 PE=2 SV=1 DOPEY1                                                                                                      | 1 | 1 | 0.240%  | 276435.43 | 5.9   |
| B3KM90 | tr B3KM90 B3KM90_HUMAN cDNA FLJ10529 fis, clone NT2RP2000965, highly similar to Targeting protein for Xklp2 OS=Homo sapiens OX=9606 PE=2 SV=1                                                 | 1 | 1 | 1.490%  | 69757.52  | 9.39  |
| B3KMD8 | tr B3KMD8 B3KMD8_HUMAN Transcription initiation factor TFIID 150 kDa subunit OS=Homo sapiens OX=9606 PE=2 SV=1                                                                                | 1 | 1 | 1.980%  | 57036.67  | 9.04  |
| B3KMI9 | tr B3KMI9 B3KMI9_HUMAN cDNA FLJ11140 fis, clone PLACE1006488, highly similar to Signal recognition particle 68 kDa protein OS=Homo sapiens OX=9606 PE=2 SV=1                                  | 1 | 1 | 2.440%  | 41372.41  | 8.92  |
| B3KMK0 | tr B3KMK0 B3KMK0_HUMAN Nuclear pore complex protein OS=Homo sapiens OX=9606 PE=2 SV=1                                                                                                         | 1 | 1 | 1.180%  | 69205.48  | 5.26  |
| B3KMW4 | tr B3KMW4 B3KMW4_HUMAN Phosphoinositide 5-phosphatase OS=Homo sapiens OX=9606 PE=2 SV=1                                                                                                       | 1 | 1 | 1.600%  | 85641.5   | 5.55  |
| B3KN43 | tr B3KN43 B3KN43_HUMAN 39S ribosomal protein L27, mitochondrial OS=Homo sapiens OX=9606 GN=MRPL27 PE=1 MRPL27 SV=1                                                                            | 1 | 1 | 12.770% | 9911.39   | 11.65 |
| B3KN52 | tr B3KN52 B3KN52_HUMAN cDNA FLJ13606 fis, clone PLACE1010579, highly similar to Homo sapiens GULP, engulfment adaptor PTB domain containing 1 (GULP1), mRNA OS=Homo sapiens OX=9606 PE=2 SV=1 | 1 | 1 | 2.630%  | 34460.06  | 8.04  |
| B3KNC3 | tr B3KNC3 B3KNC3_HUMAN Nucleolar complex protein 2 homolog OS=Homo sapiens OX=9606 PE=2 SV=1                                                                                                  | 1 | 1 | 1.340%  | 84916.47  | 5.46  |
| B3KNS8 | tr B3KNS8 B3KNS8_HUMAN cDNA FLJ30322 fis, clone BRACE2006703, highly similar to Surfeit locus protein 6 OS=Homo sapiens OX=9606 PE=2 SV=1                                                     | 1 | 1 | 1.660%  | 41507.94  | 10.6  |

|        |                                                                                                                                                                              |   |   |        |          |       |
|--------|------------------------------------------------------------------------------------------------------------------------------------------------------------------------------|---|---|--------|----------|-------|
| B3KPB2 | tr B3KPB2 B3KPB2_HUMAN Centromere protein T OS=Homo sapiens OX=9606 PE=2 SV=1                                                                                                | 1 | 1 | 0.890% | 60363.96 | 6.22  |
| B3KQG6 | tr B3KQG6 B3KQG6_HUMAN cDNA FLJ90427 fis, clone NT2RP3000481, highly similar to Importin-7 OS=Homo sapiens OX=9606 PE=2 SV=1                                                 | 1 | 1 | 1.250% | 82514.9  | 4.49  |
| B3KQI2 | tr B3KQI2 B3KQI2_HUMAN cDNA FLJ90497 fis, clone NT2RP3003874, highly similar to Myosin Ib OS=Homo sapiens OX=9606 PE=2 SV=1                                                  | 1 | 1 | 2.620% | 44809.57 | 10.07 |
| B3KQY9 | tr B3KQY9 B3KQY9_HUMAN DNA-directed RNA polymerase OS=Homo sapiens OX=9606 PE=2 SV=1                                                                                         | 1 | 1 | 1.530% | 58819.14 | 6.91  |
| B3KTL1 | tr B3KTL1 B3KTL1_HUMAN cDNA FLJ38439 fis, clone FEBRA2016739, highly similar to Alpha-N-acetylgalactosaminidealpha-2,6-sialyltransferase 5 OS=Homo sapiens OX=9606 PE=2 SV=1 | 1 | 1 | 6.160% | 16649.91 | 10.02 |
| B3KV46 | tr B3KV46 B3KV46_HUMAN Dihydrofolate reductase OS=Homo sapiens OX=9606 PE=2 SV=1                                                                                             | 1 | 1 | 3.740% | 21593.77 | 7.75  |
| B3KXF4 | tr B3KXF4 B3KXF4_HUMAN cDNA FLJ45324 fis, clone BRHIP3006449, highly similar to Catenin delta-2 OS=Homo sapiens OX=9606 PE=2 SV=1                                            | 1 | 1 | 1.640% | 87158.06 | 8.63  |
| B3KXN0 | tr B3KXN0 B3KXN0_HUMAN cDNA FLJ45747 fis, clone LIVER2008465 OS=Homo sapiens OX=9606 PE=2 SV=1                                                                               | 1 | 1 | 2.550% | 31443.27 | 8.69  |
| B4DEH8 | tr B4DEH8 B4DEH8_HUMAN Polyadenylate-binding protein 2 OS=Homo sapiens OX=9606 GN=PABPN1 PE=1 SV=1                                                                           | 1 | 1 | 6.550% | 18990.08 | 9.3   |
| B4DEQ8 | tr B4DEQ8 B4DEQ8_HUMAN cDNA FLJ60443, moderately similar to Protocadherin-8 OS=Homo sapiens OX=9606 PE=2 SV=1                                                                | 1 | 1 | 0.660% | 96866.54 | 5.48  |
| B4DFE8 | tr B4DFE8 B4DFE8_HUMAN Creatine kinase OS=Homo sapiens OX=9606 PE=2 SV=1                                                                                                     | 1 | 1 | 3.940% | 28335.18 | 7.01  |
| B4DFQ5 | tr B4DFQ5 B4DFQ5_HUMAN cDNA FLJ58134, highly similar to Cleavage stimulation factor 77 kDa subunit OS=Homo sapiens OX=9606 PE=2 SV=1                                         | 1 | 1 | 1.120% | 72184.4  | 7.56  |



|        |                                                                                                                                             |   |   |         |           |       |
|--------|---------------------------------------------------------------------------------------------------------------------------------------------|---|---|---------|-----------|-------|
| B4DGF8 | tr B4DGF8 B4DGF8_HUMAN cDNA FLJ57877, highly similar to Cleavage and polyadenylation specificity factor 7 OS=Homo sapiens OX=9606 PE=2 SV=1 | 1 | 1 | 1.730%  | 51105.34  | 7.33  |
| B4DGV9 | tr B4DGV9 B4DGV9_HUMAN cDNA FLJ55891, highly similar to Sterol regulatory element-binding protein 1 OS=Homo sapiens OX=9606 PE=2 SV=1       | 1 | 1 | 0.650%  | 114594.05 | 9.08  |
| B4DHP3 | tr B4DHP3 B4DHP3_HUMAN cDNA FLJ56346, highly similar to Regulator of nonsense transcripts 2 OS=Homo sapiens OX=9606 PE=2 SV=1               | 1 | 1 | 3.360%  | 34039.95  | 4.46  |
| B4DHU9 | tr B4DHU9 B4DHU9_HUMAN Glycylpeptide N-tetradecanoyltransferase OS=Homo sapiens OX=9606 PE=2 SV=1                                           | 1 | 1 | 1.440%  | 56524.55  | 9.38  |
| B4DID5 | tr B4DID5 B4DID5_HUMAN Transaldolase OS=Homo sapiens TALDO1 OX=9606 GN=TALDO1 PE=2 SV=1                                                     | 1 | 1 | 5.190%  | 17073.37  | 6.61  |
| B4DJ66 | tr B4DJ66 B4DJ66_HUMAN 26S proteasome non-ATPase regulatory subunit 13 OS=Homo sapiens OX=9606 PSMD13 GN=PSMD13 PE=2 SV=1                   | 1 | 1 | 3.220%  | 35346.55  | 5.68  |
| B4DJN0 | tr B4DJN0 B4DJN0_HUMAN cDNA FLJ51641, highly similar to Nicastrin OS=Homo sapiens OX=9606 PE=2 SV=1                                         | 1 | 1 | 2.440%  | 50288.33  | 5.45  |
| B4DJX9 | tr B4DJX9 B4DJX9_HUMAN Syntaxin 16, isoform CRA_c STX16 OS=Homo sapiens OX=9606 GN=STX16 PE=2 SV=1                                          | 1 | 1 | 4.320%  | 16277.58  | 5.09  |
| B4DKC2 | tr B4DKC2 B4DKC2_HUMAN cDNA FLJ55802, highly similar to Protein RUFY3 OS=Homo sapiens OX=9606 PE=2 SV=1                                     | 1 | 1 | 1.990%  | 51401.25  | 5.05  |
| B4DKZ7 | tr B4DKZ7 B4DKZ7_HUMAN cDNA FLJ55704, highly similar to Transcriptional repressor p66 alpha OS=Homo sapiens OX=9606 PE=2 SV=1               | 1 | 1 | 2.750%  | 46806.31  | 10.25 |
| B4DLL7 | tr B4DLL7 B4DLL7_HUMAN cDNA FLJ57319, highly similar to Sorting nexin-17 OS=Homo sapiens OX=9606 PE=2 SV=1                                  | 1 | 1 | 1.550%  | 43573.16  | 6.41  |
| B4DMB4 | tr B4DMB4 B4DMB4_HUMAN Synaptobrevin-like 1, isoform CRA_a OS=Homo sapiens OX=9606 GN=SYBL1 PE=2 SV=1 SYBL1                                 | 1 | 1 | 10.920% | 13338.64  | 8.86  |
| B4DMF3 | tr B4DMF3 B4DMF3_HUMAN cDNA FLJ58122, highly similar to Kinesin-like protein KIF1B OS=Homo sapiens OX=9606 PE=2 SV=1                        | 1 | 1 | 0.680%  | 99184.65  | 5.54  |

|        |                                                                                                                                                                       |   |   |        |          |       |
|--------|-----------------------------------------------------------------------------------------------------------------------------------------------------------------------|---|---|--------|----------|-------|
| B4DNM8 | tr B4DNM8 B4DNM8_HUMAN Procollagen-proline 3-dioxygenase OS=Homo sapiens OX=9606 PE=2 SV=1                                                                            | 1 | 1 | 2.160% | 68987.52 | 4.93  |
| B4DQD4 | tr B4DQD4 B4DQD4_HUMAN cDNA FLJ58389, highly similar to N-myc-interactor OS=Homo sapiens OX=9606 PE=2 SV=1                                                            | 1 | 1 | 3.950% | 17358.43 | 4.98  |
| B4DR88 | tr B4DR88 B4DR88_HUMAN RNA helicase OS=Homo sapiens OX=9606 PE=2 SV=1                                                                                                 | 1 | 1 | 1.110% | 72189.74 | 8.7   |
| B4DSL9 | tr B4DSL9 B4DSL9_HUMAN cDNA FLJ58748, highly similar to U3 small nucleolar RNA-associated protein 6homolog OS=Homo sapiens OX=9606 PE=2 SV=1                          | 1 | 1 | 3.030% | 39077.5  | 6.15  |
| B4DSQ1 | tr B4DSQ1 B4DSQ1_HUMAN Microtubule-associated protein OS=Homo sapiens OX=9606 PE=2 SV=1                                                                               | 1 | 1 | 4.420% | 26119.53 | 10.75 |
| B4DSS6 | tr B4DSS6 B4DSS6_HUMAN cDNA FLJ56649, highly similar to Homo sapiens serine/threonine kinase 11 interacting protein (STK11IP), mRNA OS=Homo sapiens OX=9606 PE=2 SV=1 | 1 | 1 | 5.790% | 13061.86 | 6.82  |
| B4DSU7 | tr B4DSU7 B4DSU7_HUMAN cDNA FLJ60866, highly similar to Protein FAM13C1 OS=Homo sapiens OX=9606 PE=2 SV=1                                                             | 1 | 1 | 1.390% | 56416.42 | 6.22  |
| B4DSU9 | tr B4DSU9 B4DSU9_HUMAN cDNA FLJ58421, highly similar to Cleavage and polyadenylation specificity factor 6 OS=Homo sapiens OX=9606 PE=2 SV=1                           | 1 | 1 | 8.330% | 33572.3  | 5.85  |
| B4DTH9 | tr B4DTH9 B4DTH9_HUMAN cDNA FLJ53190, highly similar to Beta-glucuronidase OS=Homo sapiens OX=9606 PE=2 SV=1                                                          | 1 | 1 | 1.670% | 41466.73 | 7.73  |
| B4DV84 | tr B4DV84 B4DV84_HUMAN cDNA FLJ56159, highly similar to 26S proteasome non-ATPase regulatory subunit 3 OS=Homo sapiens OX=9606 PE=2 SV=1                              | 1 | 1 | 2.890% | 59385    | 6.92  |
| B4DW39 | tr B4DW39 B4DW39_HUMAN cDNA FLJ60915, highly similar to Fc receptor-like protein 5 OS=Homo sapiens OX=9606 PE=2 SV=1                                                  | 1 | 1 | 0.980% | 67633.85 | 6.85  |
| B4DWF8 | tr B4DWF8 B4DWF8_HUMAN cDNA FLJ53414, highly similar to Nuclear pore complex protein Nup98-Nup96precursor OS=Homo sapiens OX=9606 PE=2 SV=1                           | 1 | 1 | 1.950% | 70941.67 | 6.02  |
| B4DX19 | tr B4DX19 B4DX19_HUMAN Paraoxonase OS=Homo sapiens OX=9606 PE=2 SV=1                                                                                                  | 1 | 1 | 3.100% | 39720.75 | 4.79  |

|        |                                                                                                                                                                        |   |   |        |           |      |
|--------|------------------------------------------------------------------------------------------------------------------------------------------------------------------------|---|---|--------|-----------|------|
| B4DXJ8 | tr B4DXJ8 B4DXJ8_HUMAN cDNA FLJ54970, highly similar to Zinc finger protein 462 OS=Homo sapiens OX=9606 PE=2 SV=1                                                      | 1 | 1 | 1.730% | 53093.17  | 6.51 |
| B4DY32 | tr B4DY32 B4DY32_HUMAN Asparagine synthetase [glutamine-hydrolyzing] OS=Homo sapiens OX=9606 PE=2 SV=1                                                                 | 1 | 1 | 2.300% | 54861.1   | 5.97 |
| B4DYI0 | tr B4DYI0 B4DYI0_HUMAN cDNA FLJ51573, highly similar to Golgin subfamily A member 1 OS=Homo sapiens OX=9606 PE=2 SV=1                                                  | 1 | 1 | 0.900% | 76853.79  | 5.11 |
| B4DZ26 | tr B4DZ26 B4DZ26_HUMAN cDNA FLJ52371 OS=Homo sapiens OX=9606 PE=2 SV=1                                                                                                 | 1 | 1 | 0.480% | 115111.41 | 6.12 |
| B4E002 | tr B4E002 B4E002_HUMAN cDNA FLJ59804, moderately similar to BCoR protein OS=Homo sapiens OX=9606 PE=2 SV=1                                                             | 1 | 1 | 5.110% | 19603.26  | 8.69 |
| B4E0B7 | tr B4E0B7 B4E0B7_HUMAN Condensin complex subunit 1 OS=Homo sapiens OX=9606 PE=2 SV=1                                                                                   | 1 | 1 | 0.740% | 152235.91 | 6.32 |
| B4E1K8 | tr B4E1K8 B4E1K8_HUMAN Eukaryotic translation initiation factor 3 subunit D OS=Homo sapiens OX=9606 GN=EIF3D EIF3D PE=2 SV=1                                           | 1 | 1 | 1.770% | 52826.91  | 5.6  |
| B4E1S3 | tr B4E1S3 B4E1S3_HUMAN cDNA FLJ57860, highly similar to Transmembrane protein 109 OS=Homo sapiens OX=9606 PE=2 SV=1                                                    | 1 | 1 | 5.130% | 24983.42  | 9.63 |
| B4E1U2 | tr B4E1U2 B4E1U2_HUMAN cDNA FLJ53421, highly similar to Homo sapiens guanylate binding protein family, member 6 (GBP6), mRNA OS=Homo sapiens OX=9606 PE=2 SV=1         | 1 | 1 | 1.160% | 69197.18  | 5.83 |
| B4E290 | tr B4E290 B4E290_HUMAN cDNA FLJ50039, highly similar to Homo sapiens solute carrier family 25, member 24, transcript variant 1, mRNA OS=Homo sapiens OX=9606 PE=2 SV=1 | 1 | 1 | 1.260% | 53295.8   | 6.22 |
| B4E2M7 | tr B4E2M7 B4E2M7_HUMAN Tektin OS=Homo sapiens OX=9606 PE=2 SV=1                                                                                                        | 1 | 1 | 1.840% | 30983.94  | 5.79 |
| B4E3V9 | tr B4E3V9 B4E3V9_HUMAN cDNA FLJ50388, highly similar to Protein FAN OS=Homo sapiens OX=9606 PE=2 SV=1                                                                  | 1 | 1 | 1.440% | 48199.57  | 8.94 |
| B5MDQ0 | tr B5MDQ0 B5MDQ0_HUMAN DNA excision repair protein ERCC-6-like OS=Homo sapiens OX=9606 GN=ERCC6L PE=1 ERCC6L SV=1                                                      | 1 | 1 | 1.240% | 126981.78 | 5.27 |

|        |                                                                                                                                   |   |   |         |           |       |
|--------|-----------------------------------------------------------------------------------------------------------------------------------|---|---|---------|-----------|-------|
| B5MEB3 | tr B5MEB3 B5MEB3_HUMAN Calcineurin binding protein 1, isoform CRA_c OS=Homo sapiens OX=9606 GN=CABIN1 CABIN1 PE=1 SV=1            | 1 | 1 | 1.530%  | 63323.53  | 6.33  |
| B7Z1C8 | tr B7Z1C8 B7Z1C8_HUMAN cDNA FLJ52250, highly similar to NEDD8 ultimate buster 1 OS=Homo sapiens OX=9606 PE=2 SV=1                 | 1 | 1 | 3.660%  | 19263.15  | 9.84  |
| B7Z1J1 | tr B7Z1J1 B7Z1J1_HUMAN cDNA FLJ59585 OS=Homo sapiens OX=9606 PE=2 SV=1                                                            | 1 | 1 | 9.940%  | 17861.76  | 9.4   |
| B7Z3A4 | tr B7Z3A4 B7Z3A4_HUMAN cDNA FLJ56906, highly similar to RNA-binding protein 16 OS=Homo sapiens OX=9606 PE=2 SV=1                  | 1 | 1 | 0.520%  | 148866.15 | 9.14  |
| B7Z3E3 | tr B7Z3E3 B7Z3E3_HUMAN Reticulon OS=Homo sapiens OX=9606 PE=2 SV=1                                                                | 1 | 1 | 1.200%  | 100822.75 | 4.84  |
| B7Z4G9 | tr B7Z4G9 B7Z4G9_HUMAN cDNA FLJ59344, highly similar to Membrane protein MLC1 OS=Homo sapiens OX=9606 PE=2 SV=1                   | 1 | 1 | 2.040%  | 37414.34  | 6.82  |
| B7Z570 | tr B7Z570 B7Z570_HUMAN cDNA FLJ53078, highly similar to Splicing factor, arginine/serine-rich 1 OS=Homo sapiens OX=9606 PE=2 SV=1 | 1 | 1 | 8.390%  | 16219.76  | 11.09 |
| B7Z6I9 | tr B7Z6I9 B7Z6I9_HUMAN Nitric-oxide synthase (NADPH) OS=Homo sapiens OX=9606 PE=2 SV=1                                            | 1 | 1 | 0.900%  | 111164.48 | 6.33  |
| B7Z6Q2 | tr B7Z6Q2 B7Z6Q2_HUMAN Zinc finger protein 346 OS=Homo sapiens OX=9606 GN=ZNF346 PE=1 SV=1                                        | 1 | 1 | 6.670%  | 15050.9   | 8.35  |
| B7Z6Q9 | tr B7Z6Q9 B7Z6Q9_HUMAN Cholecystokinin-12 OS=Homo sapiens OX=9606 PE=2 SV=1                                                       | 1 | 1 | 14.410% | 11598.42  | 11.16 |
| B7Z7A2 | tr B7Z7A2 B7Z7A2_HUMAN Phosphodiesterase OS=Homo sapiens OX=9606 PE=2 SV=1                                                        | 1 | 1 | 1.400%  | 57468.33  | 6.86  |
| B7Z8N7 | tr B7Z8N7 B7Z8N7_HUMAN Cytoplasmic FMR1-interacting protein OS=Homo sapiens OX=9606 PE=2 SV=1                                     | 1 | 1 | 0.980%  | 142586.3  | 6.63  |
| B7Z9I1 | tr B7Z9I1 B7Z9I1_HUMAN Medium-chain specific acyl-CoA dehydrogenase, mitochondrial OS=Homo sapiens OX=9606 PE=1 SV=1              | 1 | 1 | 3.120%  | 42426.11  | 6.1   |

|        |                                                                                                                                          |   |   |         |           |      |
|--------|------------------------------------------------------------------------------------------------------------------------------------------|---|---|---------|-----------|------|
| B7ZAE8 | tr B7ZAE8 B7ZAE8_HUMAN cDNA, FLJ79162, highly similar to Protocadherin-11 X-linked (Fragment) OS=Homo sapiens OX=9606 PE=2 SV=1          | 1 | 1 | 1.340%  | 99034.41  | 4.71 |
| B7ZB79 | tr B7ZB79 B7ZB79_HUMAN Frizzled-6 OS=Homo sapiens OX=9606 PE=2 SV=1                                                                      | 1 | 1 | 1.040%  | 75319.31  | 8.25 |
| B7ZKP0 | tr B7ZKP0 B7ZKP0_HUMAN Uncharacterized protein OS=Homo sapiens OX=9606 PE=2 SV=1                                                         | 1 | 1 | 1.720%  | 37882.28  | 8.43 |
| B7ZKX2 | tr B7ZKX2 B7ZKX2_HUMAN Uncharacterized protein OS=Homo sapiens OX=9606 PE=2 SV=1                                                         | 1 | 1 | 0.790%  | 117665.05 | 9.49 |
| B7ZME4 | tr B7ZME4 B7ZME4_HUMAN TXNDC16 protein OS=Homo sapiens OX=9606 GN=TXNDC16 PE=2 SV=1 TXNDC16                                              | 1 | 1 | 1.220%  | 93039.17  | 5.1  |
| B7ZMH4 | tr B7ZMH4 B7ZMH4_HUMAN ODZ1 protein OS=Homo sapiens OX=9606 GN=ODZ1 PE=2 SV=1 ODZ1                                                       | 1 | 1 | 0.260%  | 305872.78 | 6.02 |
| B9EFN7 | tr B9EFN7 B9EFN7_HUMAN NADH-ubiquinone oxidoreductase chain 5 OS=Homo sapiens OX=9606 GN=NADH5 PE=3 SV=1 NADH5                           | 1 | 1 | 1.160%  | 66968.69  | 9.14 |
| B9EGR7 | tr B9EGR7 B9EGR7_HUMAN ARHGEF5 OS=Homo sapiens OX=9606 GN=ARHGEF5 PE=2 SV=1 ARHGEF5                                                      | 1 | 1 | 0.380%  | 176637.23 | 5.39 |
| C9IYC5 | tr C9IYC5 C9IYC5_HUMAN Sorting nexin-8 (Fragment) OS=Homo sapiens OX=9606 GN=SNX8 PE=1 SV=1 SNX8                                         | 1 | 1 | 14.290% | 4858.68   | 6.01 |
| C9IZ80 | tr C9IZ80 C9IZ80_HUMAN Basic leucine zipper and W2 domain-containing protein 1 (Fragment) OS=Homo sapiens OX=9606 GN=BZW1 PE=1 SV=1 BZW1 | 1 | 1 | 2.040%  | 33454.07  | 7.63 |
| C9IZK7 | tr C9IZK7 C9IZK7_HUMAN WD repeat-containing protein 43 (Fragment) OS=Homo sapiens OX=9606 GN=WDR43 PE=1 SV=1 WDR43                       | 1 | 1 | 4.280%  | 20925     | 8.66 |
| C9IZN5 | tr C9IZN5 C9IZN5_HUMAN Complex I subunit B13 OS=Homo sapiens OX=9606 GN=NDUFA5 PE=1 SV=2 NDUFA5                                          | 1 | 1 | 6.120%  | 11169.13  | 7.75 |
| C9IZR8 | tr C9IZR8 C9IZR8_HUMAN Engulfment and cell motility protein 1 (Fragment) OS=Homo sapiens OX=9606 GN=ELMO1 PE=1 SV=1 ELMO1                | 1 | 1 | 3.590%  | 18622.93  | 4.7  |

|        |                                                                                                                                            |        |   |   |         |           |       |
|--------|--------------------------------------------------------------------------------------------------------------------------------------------|--------|---|---|---------|-----------|-------|
| C9J1C5 | tr C9J1C5 C9J1C5_HUMAN 40S ribosomal protein S27<br>OS=Homo sapiens OX=9606 GN=RPS27L PE=3 SV=1                                            | RPS27L | 1 | 1 | 15.380% | 5646.62   | 9.12  |
| C9J2C4 | tr C9J2C4 C9J2C4_HUMAN DnaJ homolog subfamily B<br>member 6 (Fragment) OS=Homo sapiens OX=9606 DNAJB6<br>GN=DNAJB6 PE=1 SV=1               | DNAJB6 | 1 | 1 | 4.390%  | 25376.59  | 6.46  |
| C9J470 | tr C9J470 C9J470_HUMAN Condensin complex subunit 2<br>(Fragment) OS=Homo sapiens OX=9606 GN=NCAPH PE=1 NCAPH<br>SV=8                       | NCAPH  | 1 | 1 | 1.810%  | 68010.64  | 4.79  |
| C9J4N6 | tr C9J4N6 C9J4N6_HUMAN Isocitrate dehydrogenase [NADP]<br>cytoplasmic (Fragment) OS=Homo sapiens OX=9606 GN=IDH1 IDH1<br>PE=1 SV=1         | IDH1   | 1 | 1 | 5.730%  | 17719.3   | 8.48  |
| C9J6F6 | tr C9J6F6 C9J6F6_HUMAN Aquaporin OS=Homo sapiens<br>OX=9606 GN=AQP12A PE=3 SV=1                                                            | AQP12A | 1 | 1 | 1.630%  | 32644.61  | 8.09  |
| C9J8P0 | tr C9J8P0 C9J8P0_HUMAN Calcium/calmodulin-dependent<br>protein kinase type 1B (Fragment) OS=Homo sapiens OX=9606 PNCK<br>GN=PNCK PE=1 SV=1 | PNCK   | 1 | 1 | 6.380%  | 10362.03  | 10.11 |
| C9JER0 | tr C9JER0 C9JER0_HUMAN POM121 and ZP3 fusion protein<br>OS=Homo sapiens OX=9606 GN=POMZP3 PE=4 SV=1                                        | POMZP3 | 1 | 1 | 5.190%  | 17273.84  | 9.63  |
| C9JHK9 | tr C9JHK9 C9JHK9_HUMAN ATP-binding cassette sub-family F<br>member 2 (Fragment) OS=Homo sapiens OX=9606 GN=ABCF2 ABCF2<br>PE=1 SV=1        | ABCF2  | 1 | 1 | 2.920%  | 26929.57  | 6.34  |
| C9JKA9 | tr C9JKA9 C9JKA9_HUMAN Kinesin-like protein KIF15<br>OS=Homo sapiens OX=9606 GN=KIF15 PE=1 SV=1                                            | KIF15  | 1 | 1 | 1.170%  | 120338.01 | 5.44  |
| C9JMZ3 | tr C9JMZ3 C9JMZ3_HUMAN Aminopeptidase B (Fragment)<br>OS=Homo sapiens OX=9606 GN=RNPEP PE=1 SV=1                                           | RNPEP  | 1 | 1 | 3.490%  | 38998.29  | 4.92  |
| C9JPA8 | tr C9JPA8 C9JPA8_HUMAN Golgi to ER traffic protein 4<br>homolog (Fragment) OS=Homo sapiens OX=9606 GN=GET4 GET4<br>PE=1 SV=2               | GET4   | 1 | 1 | 6.760%  | 16542.55  | 5.46  |
| C9JYT6 | tr C9JYT6 C9JYT6_HUMAN Semaphorin-3D OS=Homo<br>sapiens OX=9606 GN=SEMA3D PE=1 SV=1                                                        | SEMA3D | 1 | 1 | 2.040%  | 33634.14  | 6.15  |
| C9JZR2 | tr C9JZR2 C9JZR2_HUMAN Catenin delta-1 OS=Homo sapiens<br>OX=9606 GN=CTNND1 PE=1 SV=2                                                      | CTNND1 | 1 | 1 | 0.750%  | 104847.32 | 6.41  |

|        |                                                                                                                                                |   |   |         |           |       |
|--------|------------------------------------------------------------------------------------------------------------------------------------------------|---|---|---------|-----------|-------|
| D3DWL0 | tr D3DWL0 D3DWL0_HUMAN Plectin 1, intermediate filament binding protein 500kDa, isoform CRA_b OS=Homo sapiens PLEC1 OX=9606 GN=PLEC1 PE=4 SV=1 | 1 | 1 | 0.480%  | 234116.41 | 5.7   |
| D6RAE5 | tr D6RAE5 D6RAE5_HUMAN DNA polymerase kappa POLK OS=Homo sapiens OX=9606 GN=POLK PE=1 SV=1                                                     | 1 | 1 | 3.540%  | 45316.5   | 8.09  |
| D6RBC8 | tr D6RBC8 D6RBC8_HUMAN Spermatogenesis-associated protein 24 OS=Homo sapiens OX=9606 GN=SPATA24 PE=1 SPATA24 SV=1                              | 1 | 1 | 3.010%  | 18253.88  | 9.68  |
| D6RD36 | tr D6RD36 D6RD36_HUMAN Regulator of G-protein-signaling 8 (Fragment) OS=Homo sapiens OX=9606 GN=RGS8 PE=1 RGS8 SV=1                            | 1 | 1 | 14.040% | 6452.41   | 10.04 |
| D6REZ7 | tr D6REZ7 D6REZ7_HUMAN Nuclear receptor subfamily 1 group I member 3 OS=Homo sapiens OX=9606 GN=NR1I3 NR1I3 PE=3 SV=1                          | 1 | 1 | 3.300%  | 31371.33  | 7.77  |
| D6RJ99 | tr D6RJ99 D6RJ99_HUMAN DNA damage-inducible transcript 4-like protein (Fragment) OS=Homo sapiens OX=9606 DDIT4L GN=DDIT4L PE=3 SV=1            | 1 | 1 | 3.950%  | 20020.85  | 6.14  |
| D6RJE8 | tr D6RJE8 D6RJE8_HUMAN Eukaryotic peptide chain release factor subunit 1 (Fragment) OS=Homo sapiens OX=9606 ETF1 GN=ETF1 PE=1 SV=8             | 1 | 1 | 10.920% | 13231.26  | 8.56  |
| D6W625 | tr D6W625 D6W625_HUMAN Chromatin assembly factor 1, subunit A (P150), isoform CRA_a OS=Homo sapiens OX=9606 CHAF1A GN=CHAF1A PE=3 SV=1         | 1 | 1 | 1.050%  | 106936.71 | 5.69  |
| D9ZGF8 | tr D9ZGF8 D9ZGF8_HUMAN Rho-associated protein kinase OS=Homo sapiens OX=9606 GN=ROCK1 PE=3 SV=1                                                | 1 | 1 | 0.660%  | 158242.01 | 5.69  |
| E2QRN4 | tr E2QRN4 E2QRN4_HUMAN DBIRD complex subunit ZNF326 OS=Homo sapiens OX=9606 GN=ZNF326 PE=1 SV=1                                                | 1 | 1 | 15.090% | 5967.54   | 4.88  |
| E5RFP7 | tr E5RFP7 E5RFP7_HUMAN N-acetyltransferase ESCO2 (Fragment) OS=Homo sapiens OX=9606 GN=ESCO2 PE=1 ESCO2 SV=1                                   | 1 | 1 | 5.260%  | 15325.24  | 9.13  |
| E5RHY6 | tr E5RHY6 E5RHY6_HUMAN Serine/threonine-protein kinase Sgk3 (Fragment) OS=Homo sapiens OX=9606 GN=SGK3 PE=1 SGK3 SV=1                          | 1 | 1 | 3.610%  | 19706.43  | 9.57  |
| E5RIM3 | tr E5RIM3 E5RIM3_HUMAN Phospholipase A-2-activating protein OS=Homo sapiens OX=9606 GN=PLAA PE=1 SV=1                                          | 1 | 1 | 2.790%  | 66733.65  | 5.66  |

|        |                                                                                                                                                  |   |   |         |           |       |
|--------|--------------------------------------------------------------------------------------------------------------------------------------------------|---|---|---------|-----------|-------|
| E7ENQ1 | tr E7ENQ1 E7ENQ1_HUMAN Mitogen-activated protein kinase kinase kinase 4 OS=Homo sapiens OX=9606 MAP4K4 GN=MAP4K4 PE=1 SV=1                       | 1 | 1 | 0.610%  | 132164.34 | 7.22  |
| E7EPD2 | tr E7EPD2 E7EPD2_HUMAN Signal transducer and activator of transcription 1-alpha/beta (Fragment) OS=Homo sapiens STAT1 OX=9606 GN=STAT1 PE=1 SV=2 | 1 | 1 | 3.180%  | 45026.88  | 6.29  |
| E7ERI8 | tr E7ERI8 E7ERI8_HUMAN CLIP-associating protein 2 OS=Homo sapiens OX=9606 GN=CLASP2 PE=1 SV=1                                                    | 1 | 1 | 1.060%  | 165625.78 | 8.5   |
| E7EUY5 | tr E7EUY5 E7EUY5_HUMAN Single-stranded DNA-binding protein, mitochondrial (Fragment) OS=Homo sapiens OX=9606 SSBP1 GN=SSBP1 PE=1 SV=1            | 1 | 1 | 11.110% | 15712.73  | 9.84  |
| E7EW71 | tr E7EW71 E7EW71_HUMAN Mu-type opioid receptor (Fragment) OS=Homo sapiens OX=9606 GN=OPRM1 PE=1 OPRM1 SV=8                                       | 1 | 1 | 4.940%  | 17265.73  | 9     |
| E9PB51 | tr E9PB51 E9PB51_HUMAN RNA-binding protein 4 (Fragment) OS=Homo sapiens OX=9606 GN=RBM4 PE=1 SV=1                                                | 1 | 1 | 4.170%  | 26286.25  | 7.12  |
| E9PF17 | tr E9PF17 E9PF17_HUMAN Poly [ADP-ribose] polymerase OS=Homo sapiens OX=9606 GN=PARP8 PE=1 SV=1                                                   | 1 | 1 | 0.840%  | 93380.01  | 8.6   |
| E9PJ40 | tr E9PJ40 E9PJ40_HUMAN Receptor-binding cancer antigen-expressed on SiSo cells (Fragment) OS=Homo sapiens EBAG9 OX=9606 GN=EBAG9 PE=1 SV=1       | 1 | 1 | 19.510% | 4514.21   | 10.43 |
| E9PLJ3 | tr E9PLJ3 E9PLJ3_HUMAN Cofilin, non-muscle isoform (Fragment) OS=Homo sapiens OX=9606 GN=CFL1 PE=1 SV=1                                          | 1 | 1 | 13.920% | 9090.44   | 8.5   |
| E9PP00 | tr E9PP00 E9PP00_HUMAN Probable ribonuclease OS=Homo sapiens OX=9606 GN=ZC3H12C PE=1 SV=1                                                        | 1 | 1 | 1.290%  | 95877.27  | 6.4   |
| E9PP83 | tr E9PP83 E9PP83_HUMAN E3 ubiquitin-protein ligase TRIM68 (Fragment) OS=Homo sapiens OX=9606 GN=TRIM68 PE=1 TRIM68 SV=1                          | 1 | 1 | 4.230%  | 16856.02  | 7.78  |
| E9PR30 | tr E9PR30 E9PR30_HUMAN 40S ribosomal protein S30 OS=Homo sapiens OX=9606 GN=FAU PE=1 SV=1                                                        | 1 | 1 | 10.200% | 10904.68  | 11.56 |
| F1T0H9 | tr F1T0H9 F1T0H9_HUMAN Uncharacterized protein OS=Homo sapiens OX=9606 GN=EYS PE=2 SV=1                                                          | 1 | 1 | 16.440% | 7623.68   | 5.99  |



|        |                                                                                                                                                     |         |   |   |        |           |      |
|--------|-----------------------------------------------------------------------------------------------------------------------------------------------------|---------|---|---|--------|-----------|------|
| F5GWJ5 | tr F5GWJ5 F5GWJ5_HUMAN Roundabout homolog 3 OS=Homo sapiens OX=9606 GN=ROBO3 PE=1 SV=1                                                              | ROBO3   | 1 | 1 | 0.510% | 146054.87 | 6.88 |
| F5GXQ8 | tr F5GXQ8 F5GXQ8_HUMAN Nesprin-1 OS=Homo sapiens OX=9606 GN=SYNE1 PE=1 SV=1                                                                         | SYNE1   | 1 | 1 | 0.490% | 166123.48 | 6.18 |
| F5GZ28 | tr F5GZ28 F5GZ28_HUMAN DNA ligase OS=Homo sapiens OX=9606 GN=LIG1 PE=1 SV=1                                                                         | LIG1    | 1 | 1 | 0.710% | 93946.48  | 5.77 |
| F5GZS6 | tr F5GZS6 F5GZS6_HUMAN 4F2 cell-surface antigen heavy chain OS=Homo sapiens OX=9606 GN=SLC3A2 PE=1 SV=1                                             | SLC3A2  | 1 | 1 | 2.170% | 64871.72  | 4.97 |
| F5H1Y3 | tr F5H1Y3 F5H1Y3_HUMAN Flap endonuclease 1 (Fragment) OS=Homo sapiens OX=9606 GN=FEN1 PE=1 SV=1                                                     | FEN1    | 1 | 1 | 6.670% | 18274.78  | 6.84 |
| F5H1Y4 | tr F5H1Y4 F5H1Y4_HUMAN Golgi-associated PDZ and coiled-coil motif containing protein transcript variant 3 OS=Homo sapiens OX=9606 GN=GOPC PE=1 SV=2 | GOPC    | 1 | 1 | 1.720% | 44789.93  | 5.46 |
| F5H2T0 | tr F5H2T0 F5H2T0_HUMAN I kappa B kinase complex-associated protein OS=Homo sapiens OX=9606 GN=ELP1 PE=1 SV=1                                        | ELP1    | 1 | 1 | 1.220% | 111474.11 | 5.87 |
| F5H3Y4 | tr F5H3Y4 F5H3Y4_HUMAN Probable ATP-dependent RNA helicase DHX37 (Fragment) OS=Homo sapiens OX=9606 GN=DHX37 PE=1 SV=2                              | DHX37   | 1 | 1 | 0.600% | 110690.59 | 7.25 |
| F5H4D1 | tr F5H4D1 F5H4D1_HUMAN Adenylate cyclase OS=Homo sapiens OX=9606 GN=ADCY7 PE=1 SV=1                                                                 | ADCY7   | 1 | 1 | 0.820% | 81477.44  | 8.94 |
| F5H5R4 | tr F5H5R4 F5H5R4_HUMAN Mas-related G-protein-coupled receptor member F OS=Homo sapiens OX=9606 GN=MRGPRF PE=1 SV=1                                  | MRGPRF  | 1 | 1 | 7.690% | 10613.88  | 5.53 |
| F8VPN9 | tr F8VPN9 F8VPN9_HUMAN Vezatin (Fragment) OS=Homo sapiens OX=9606 GN=VEZT PE=1 SV=1                                                                 | VEZT    | 1 | 1 | 6.740% | 10197.72  | 4.98 |
| F8VT91 | tr F8VT91 F8VT91_HUMAN SPATS2-like protein (Fragment) OS=Homo sapiens OX=9606 GN=SPATS2L PE=1 SV=1                                                  | SPATS2L | 1 | 1 | 2.660% | 20885.36  | 9.39 |
| F8VU08 | tr F8VU08 F8VU08_HUMAN Hematopoietically-expressed homeobox protein HHEX OS=Homo sapiens OX=9606 GN=HHEX PE=1 SV=1                                  | HHEX    | 1 | 1 | 6.120% | 11252.95  | 4.51 |

|        |                                                                                                                                 |          |   |   |         |           |       |
|--------|---------------------------------------------------------------------------------------------------------------------------------|----------|---|---|---------|-----------|-------|
| F8VU51 | tr F8VU51 F8VU51_HUMAN YLP motif-containing protein 1<br>OS=Homo sapiens OX=9606 GN=YLPM1 PE=1 SV=1                             | YLPM1    | 1 | 1 | 0.900%  | 160739.95 | 6.11  |
| F8VV63 | tr F8VV63 F8VV63_HUMAN Uncharacterized protein C12orf42<br>OS=Homo sapiens OX=9606 GN=C12orf42 PE=4 SV=1                        | C12orf42 | 1 | 1 | 3.410%  | 31951.79  | 9.79  |
| F8W122 | tr F8W122 F8W122_HUMAN Phosphatidylinositol phosphatase<br>PTPRQ (Fragment) OS=Homo sapiens OX=9606 GN=PTPRQ PTPRQ<br>PE=4 SV=1 | PTPRQ    | 1 | 1 | 1.810%  | 37137.45  | 9.4   |
| F8W7R3 | tr F8W7R3 F8W7R3_HUMAN Fanconi anemia group I protein<br>OS=Homo sapiens OX=9606 GN=FANCI PE=1 SV=1                             | FANCI    | 1 | 1 | 1.370%  | 123240.36 | 5.9   |
| F8WAQ4 | tr F8WAQ4 F8WAQ4_HUMAN BTB/POZ domain-containing<br>protein 3 OS=Homo sapiens OX=9606 GN=BTBD3 PE=1 SV=1                        | BTBD3    | 1 | 1 | 14.000% | 5692.32   | 9.52  |
| F8WBU7 | tr F8WBU7 F8WBU7_HUMAN Calcium/calmodulin-dependent<br>protein kinase type 1B OS=Homo sapiens OX=9606 GN=PNCK PNCK<br>PE=1 SV=1 | PNCK     | 1 | 1 | 7.320%  | 9381.49   | 11.65 |
| F8WFB6 | tr F8WFB6 F8WFB6_HUMAN Apoptosis-inducing factor 3<br>OS=Homo sapiens OX=9606 GN=AIFM3 PE=1 SV=1                                | AIFM3    | 1 | 1 | 9.920%  | 13223.7   | 7.01  |
| G1UI16 | tr G1UI16 G1UI16_HUMAN SCC-112 protein, isoform CRA_b<br>OS=Homo sapiens OX=9606 GN=PDS5A PE=2 SV=1                             | PDS5A    | 1 | 1 | 0.970%  | 150828.47 | 8.15  |
| G1UI22 | tr G1UI22 G1UI22_HUMAN Afadin OS=Homo sapiens<br>OX=9606 GN=MLLT4 PE=2 SV=1                                                     | MLLT4    | 1 | 1 | 0.560%  | 201817.36 | 6.11  |
| G3V121 | tr G3V121 G3V121_HUMAN Coiled-coil domain-containing<br>protein 25 OS=Homo sapiens OX=9606 GN=CCDC25 PE=1 CCDC25<br>SV=1        | CCDC25   | 1 | 1 | 10.470% | 9950.16   | 5.91  |
| G3V1B6 | tr G3V1B6 G3V1B6_HUMAN MICOS complex subunit MIC26<br>OS=Homo sapiens OX=9606 GN=APOO PE=1 SV=1                                 | APOO     | 1 | 1 | 17.540% | 13101.09  | 6.72  |
| G3V1L9 | tr G3V1L9 G3V1L9_HUMAN Tight junction protein ZO-1<br>OS=Homo sapiens OX=9606 GN=TJP1 PE=1 SV=2                                 | TJP1     | 1 | 1 | 0.430%  | 208292.23 | 6.8   |
| G3V1M5 | tr G3V1M5 G3V1M5_HUMAN Transmembrane protein 134<br>OS=Homo sapiens OX=9606 GN=TMEM134 PE=1 SV=1                                | TMEM134  | 1 | 1 | 9.240%  | 12154.02  | 4.39  |

|        |                                                                                                                                         |        |   |   |         |           |       |
|--------|-----------------------------------------------------------------------------------------------------------------------------------------|--------|---|---|---------|-----------|-------|
| G3V3A5 | tr G3V3A5 G3V3A5_HUMAN Tetratricopeptide repeat protein 6<br>OS=Homo sapiens OX=9606 GN=TTC6 PE=1 SV=1                                  | TTC6   | 1 | 1 | 0.530%  | 216441.93 | 8.94  |
| G3V4I8 | tr G3V4I8 G3V4I8_HUMAN G patch domain-containing protein<br>2-like (Fragment) OS=Homo sapiens OX=9606 GN=GPATCH2L GPATCH2L<br>PE=4 SV=2 |        | 1 | 1 | 19.350% | 3161.62   | 12.18 |
| G8JL96 | tr G8JL96 G8JL96_HUMAN Protein-tyrosine-phosphatase<br>OS=Homo sapiens OX=9606 GN=PTPRS PE=1 SV=2                                       | PTPRS  | 1 | 1 | 0.730%  | 168427.78 | 6.23  |
| G8JLH2 | tr G8JLH2 G8JLH2_HUMAN M-phase inducer phosphatase<br>OS=Homo sapiens OX=9606 GN=CDC25B PE=1 SV=1                                       | CDC25B | 1 | 1 | 3.270%  | 55959.64  | 6.53  |
| G8YXX4 | tr G8YXX4 G8YXX4_HUMAN CD19-ligand protein OS=Homo<br>sapiens OX=9606 GN=Bbtx1 PE=4 SV=1                                                | Bbtx1  | 1 | 1 | 1.230%  | 53376.62  | 8.24  |
| H0Y3V3 | tr H0Y3V3 H0Y3V3_HUMAN Adhesion G protein-coupled<br>receptor L2 (Fragment) OS=Homo sapiens OX=9606 ADGRL2<br>GN=ADGRL2 PE=1 SV=1       |        | 1 | 1 | 1.270%  | 52311.07  | 5.93  |
| H0Y4C5 | tr H0Y4C5 H0Y4C5_HUMAN NGFI-A-binding protein 1<br>(Fragment) OS=Homo sapiens OX=9606 GN=NAB1 PE=1 NAB1<br>SV=1                         |        | 1 | 1 | 2.500%  | 27655.88  | 8.8   |
| H0Y534 | tr H0Y534 H0Y534_HUMAN Kinesin-like protein KIF16B<br>(Fragment) OS=Homo sapiens OX=9606 GN=KIF16B PE=1 KIF16B<br>SV=8                  |        | 1 | 1 | 5.950%  | 22632.45  | 5.42  |
| H0Y5P8 | tr H0Y5P8 H0Y5P8_HUMAN BTB/POZ domain-containing<br>protein KCTD3 (Fragment) OS=Homo sapiens OX=9606 KCTD3<br>GN=KCTD3 PE=1 SV=1        |        | 1 | 1 | 5.950%  | 18139.33  | 9.04  |
| H0Y7V4 | tr H0Y7V4 H0Y7V4_HUMAN Dynein axonemal heavy chain 8<br>OS=Homo sapiens OX=9606 GN=DNAH8 PE=1 SV=1                                      | DNAH8  | 1 | 1 | 0.170%  | 478865.43 | 5.8   |
| H0Y7Z8 | tr H0Y7Z8 H0Y7Z8_HUMAN Probable ATP-dependent RNA<br>helicase DDX59 (Fragment) OS=Homo sapiens OX=9606 DDX59<br>GN=DDX59 PE=1 SV=1      |        | 1 | 1 | 8.510%  | 10539.89  | 6.56  |
| H0Y7Z9 | tr H0Y7Z9 H0Y7Z9_HUMAN Protein-tyrosine-phosphatase<br>(Fragment) OS=Homo sapiens OX=9606 GN=PTPRF PE=1 PTPRF<br>SV=1                   |        | 1 | 1 | 0.900%  | 150351.41 | 6.19  |
| H0Y863 | tr H0Y863 H0Y863_HUMAN Pseudouridylate synthase 7<br>homolog (Fragment) OS=Homo sapiens OX=9606 GN=PUS7 PUS7<br>PE=1 SV=1               |        | 1 | 1 | 4.550%  | 15050.07  | 9.24  |

|        |                                                                                                                                       |   |   |         |           |      |
|--------|---------------------------------------------------------------------------------------------------------------------------------------|---|---|---------|-----------|------|
| H0Y8H7 | tr H0Y8H7 H0Y8H7_HUMAN Rap guanine nucleotide exchange factor 2 (Fragment) OS=Homo sapiens OX=9606 RAPGEF2 GN=RAPGEF2 PE=1 SV=8       | 1 | 1 | 3.020%  | 28493.41  | 8.91 |
| H0Y8S9 | tr H0Y8S9 H0Y8S9_HUMAN Methionine synthase reductase (Fragment) OS=Homo sapiens OX=9606 GN=MTRR PE=1 MTRR SV=1                        | 1 | 1 | 2.960%  | 40969.78  | 4.97 |
| H0Y938 | tr H0Y938 H0Y938_HUMAN Coatamer subunit beta' OS=Homo sapiens OX=9606 GN=COPB2 PE=1 SV=2                                              | 1 | 1 | 0.670%  | 101532.12 | 5.55 |
| H0YA88 | tr H0YA88 H0YA88_HUMAN DNA polymerase nu (Fragment) OS=Homo sapiens OX=9606 GN=POLN PE=1 SV=1                                         | 1 | 1 | 1.150%  | 58361.79  | 9.25 |
| H0YAD4 | tr H0YAD4 H0YAD4_HUMAN Zinc finger and BTB domain-containing protein 49 (Fragment) OS=Homo sapiens OX=9606 ZBTB49 GN=ZBTB49 PE=4 SV=1 | 1 | 1 | 4.100%  | 13778.22  | 7.08 |
| H0YAF7 | tr H0YAF7 H0YAF7_HUMAN Neurolysin, mitochondrial (Fragment) OS=Homo sapiens OX=9606 GN=NLN PE=1 SV=2                                  | 1 | 1 | 3.890%  | 31718.67  | 5.7  |
| H0YBR0 | tr H0YBR0 H0YBR0_HUMAN Trafficking protein particle complex subunit 9 (Fragment) OS=Homo sapiens OX=9606 TRAPPC9 GN=TRAPPC9 PE=1 SV=1 | 1 | 1 | 0.600%  | 110088.67 | 6.39 |
| H0YC14 | tr H0YC14 H0YC14_HUMAN Heat shock factor protein 4 (Fragment) OS=Homo sapiens OX=9606 GN=HSF4 PE=4 SV=1                               | 1 | 1 | 10.390% | 8061.73   | 5.28 |
| H0YCB4 | tr H0YCB4 H0YCB4_HUMAN Transcription factor p65 (Fragment) OS=Homo sapiens OX=9606 GN=RELA PE=1 SV=1                                  | 1 | 1 | 8.330%  | 8254.38   | 11.4 |
| H0YDD8 | tr H0YDD8 H0YDD8_HUMAN 60S acidic ribosomal protein P2 (Fragment) OS=Homo sapiens OX=9606 GN=RPLP2 PE=1 RPLP2 SV=1                    | 1 | 1 | 14.130% | 8985.74   | 4.38 |
| H0YDM2 | tr H0YDM2 H0YDM2_HUMAN Protein SOGA1 (Fragment) OS=Homo sapiens OX=9606 GN=SOGA1 PE=1 SV=1                                            | 1 | 1 | 1.180%  | 142114.17 | 5.94 |
| H0YDV8 | tr H0YDV8 H0YDV8_HUMAN CD44 antigen (Fragment) OS=Homo sapiens OX=9606 GN=CD44 PE=1 SV=2                                              | 1 | 1 | 3.140%  | 21179.39  | 5.7  |
| H0YE80 | tr H0YE80 H0YE80_HUMAN Ankyrin repeat domain-containing protein 42 (Fragment) OS=Homo sapiens OX=9606 ANKRD42 GN=ANKRD42 PE=1 SV=1    | 1 | 1 | 4.230%  | 16191.27  | 8.44 |

|        |                                                                                                                                           |   |   |         |          |      |
|--------|-------------------------------------------------------------------------------------------------------------------------------------------|---|---|---------|----------|------|
| H0YEQ1 | tr H0YEQ1 H0YEQ1_HUMAN E3 ubiquitin-protein ligase RNF169 (Fragment) OS=Homo sapiens OX=9606 GN=RNF169 RNF169 PE=1 SV=1                   | 1 | 1 | 12.660% | 8988.05  | 9.3  |
| H0YF54 | tr H0YF54 H0YF54_HUMAN von Willebrand factor A domain-containing protein 3B (Fragment) OS=Homo sapiens OX=9606 VWA3B GN=VWA3B PE=1 SV=1   | 1 | 1 | 7.620%  | 11731.12 | 5.79 |
| H0YFM3 | tr H0YFM3 H0YFM3_HUMAN Transmembrane 7 superfamily member 3 (Fragment) OS=Homo sapiens OX=9606 TM7SF3 GN=TM7SF3 PE=1 SV=1                 | 1 | 1 | 4.000%  | 21870.68 | 9.08 |
| H0YFT0 | tr H0YFT0 H0YFT0_HUMAN Transmembrane 7 superfamily member 3 (Fragment) OS=Homo sapiens OX=9606 TM7SF3 GN=TM7SF3 PE=1 SV=1                 | 1 | 1 | 7.640%  | 16059.44 | 7.93 |
| H0YG18 | tr H0YG18 H0YG18_HUMAN Mesothelin-like protein (Fragment) OS=Homo sapiens OX=9606 GN=MSLNL PE=3 MSLNL SV=1                                | 1 | 1 | 0.660%  | 79712.4  | 7.07 |
| H0YG99 | tr H0YG99 H0YG99_HUMAN Forkhead box protein M1 (Fragment) OS=Homo sapiens OX=9606 GN=FOXM1 PE=1 FOXM1 SV=1                                | 1 | 1 | 5.340%  | 22942.46 | 9.84 |
| H0YGG4 | tr H0YGG4 H0YGG4_HUMAN Translation initiation factor eIF-2B subunit alpha (Fragment) OS=Homo sapiens OX=9606 EIF2B1 GN=EIF2B1 PE=1 SV=1   | 1 | 1 | 3.950%  | 16816.03 | 6.48 |
| H0YGL3 | tr H0YGL3 H0YGL3_HUMAN T-cell differentiation antigen CD6 (Fragment) OS=Homo sapiens OX=9606 GN=CD6 PE=1 SV=8 CD6                         | 1 | 1 | 3.240%  | 19895.72 | 5.96 |
| H0YJ97 | tr H0YJ97 H0YJ97_HUMAN Thyroid receptor-interacting protein 11 (Fragment) OS=Homo sapiens OX=9606 GN=TRIP11 PE=1 TRIP11 SV=1              | 1 | 1 | 0.350%  | 195699.6 | 5.15 |
| H0YJC6 | tr H0YJC6 H0YJC6_HUMAN Inositol 1,4,5-triphosphate receptor-associated 2 (Fragment) OS=Homo sapiens OX=9606 IRAG2 GN=IRAG2 PE=1 SV=1      | 1 | 1 | 14.430% | 10947.42 | 5.6  |
| H0YJR4 | tr H0YJR4 H0YJR4_HUMAN SH2 domain-containing adapter protein E (Fragment) OS=Homo sapiens OX=9606 GN=SHE SHE PE=4 SV=1                    | 1 | 1 | 21.950% | 4472.91  | 9.11 |
| H0YJS4 | tr H0YJS4 H0YJS4_HUMAN Eukaryotic translation initiation factor 2 subunit 1 (Fragment) OS=Homo sapiens OX=9606 EIF2S1 GN=EIF2S1 PE=1 SV=1 | 1 | 1 | 2.780%  | 28865.02 | 8.71 |
| H0YLT0 | tr H0YLT0 H0YLT0_HUMAN Gamma-secretase subunit APH-1B (Fragment) OS=Homo sapiens OX=9606 GN=APH1B PE=1 APH1B SV=1                         | 1 | 1 | 3.150%  | 24320.23 | 9.1  |

|        |                                                                                                                                                    |             |   |   |         |           |      |
|--------|----------------------------------------------------------------------------------------------------------------------------------------------------|-------------|---|---|---------|-----------|------|
| H0YLW8 | tr H0YLW8 H0YLW8_HUMAN<br>Proline-serine-threonine<br>phosphatase-interacting protein 1 (Fragment)<br>OS=Homo sapiens OX=9606 GN=PSTPIP1 PE=1 SV=8 | PSTPIP1     | 1 | 1 | 3.850%  | 24612.57  | 9.08 |
| H0YN97 | tr H0YN97 H0YN97_HUMAN<br>Treslin (Fragment)<br>OS=Homo sapiens OX=9606 GN=TICRR PE=1 SV=1                                                         | TICRR       | 1 | 1 | 2.800%  | 23234.58  | 5.14 |
| H3BM37 | tr H3BM37 H3BM37_HUMAN<br>Neuropilin and tolloid-like protein<br>2 (Fragment)<br>OS=Homo sapiens OX=9606 GN=NETO2 PE=1 NETO2<br>SV=2               | NETO2       | 1 | 1 | 1.370%  | 41377.81  | 8.01 |
| H3BMW3 | tr H3BMW3 H3BMW3_HUMAN<br>Neutral alpha-glucosidase C<br>(Fragment)<br>OS=Homo sapiens OX=9606 GN=GANC PE=1 GANC<br>SV=8                           | GANC        | 1 | 1 | 10.450% | 7846.69   | 5.04 |
| H3BQV0 | tr H3BQV0 H3BQV0_HUMAN<br>KLRC4-KLRK1 readthrough<br>(Fragment)<br>OS=Homo sapiens OX=9606 GN=KLRC4-KLRK1<br>KLRC4-KLR PE=4 SV=1                   | KLRC4-KLRK1 | 1 | 1 | 9.330%  | 17167.85  | 9.09 |
| H3BQZ6 | tr H3BQZ6 H3BQZ6_HUMAN<br>Synaptotagmin XVII<br>OS=Homo sapiens OX=9606 GN=SYT17 PE=1 SV=2                                                         | SYT17       | 1 | 1 | 2.040%  | 44126.53  | 8.2  |
| H3BRS6 | tr H3BRS6 H3BRS6_HUMAN<br>ADP-dependent glucokinase<br>(Fragment)<br>OS=Homo sapiens OX=9606 GN=ADPGK PE=1 ADPGK<br>SV=1                           | ADPGK       | 1 | 1 | 2.450%  | 21804.54  | 5.34 |
| H3BT55 | tr H3BT55 H3BT55_HUMAN<br>Calpain-15 (Fragment)<br>OS=Homo sapiens OX=9606 GN=CAPN15 PE=4 SV=1                                                     | CAPN15      | 1 | 1 | 16.070% | 11887.65  | 12   |
| H3BUN0 | tr H3BUN0 H3BUN0_HUMAN<br>E3 ubiquitin-protein ligase<br>RBBP6 (Fragment)<br>OS=Homo sapiens OX=9606 GN=RBBP6 RBBP6<br>PE=1 SV=1                   | RBBP6       | 1 | 1 | 5.330%  | 32969.36  | 5.76 |
| H3BUT7 | tr H3BUT7 H3BUT7_HUMAN<br>RNA exonuclease 5 (Fragment)<br>OS=Homo sapiens OX=9606 GN=REXO5 PE=1 SV=1                                               | REXO5       | 1 | 1 | 3.490%  | 19557.22  | 8.69 |
| H3BUZ4 | tr H3BUZ4 H3BUZ4_HUMAN<br>E3 ubiquitin-protein ligase<br>(Fragment)<br>OS=Homo sapiens OX=9606 GN=UBR1 PE=1 UBR1<br>SV=1                           | UBR1        | 1 | 1 | 8.450%  | 8119.04   | 9.66 |
| H7BXG7 | tr H7BXG7 H7BXG7_HUMAN<br>Protein transport protein Sec31A<br>OS=Homo sapiens OX=9606 GN=SEC31A PE=1 SV=1                                          | SEC31A      | 1 | 1 | 0.930%  | 105703.26 | 8.61 |
| H7BY35 | tr H7BY35 H7BY35_HUMAN<br>Ryanodine receptor 2<br>OS=Homo sapiens OX=9606 GN=RYSR2 PE=1 SV=2                                                       | RYSR2       | 1 | 1 | 0.140%  | 562603.37 | 5.81 |

|        |                                                                                                                                         |         |   |   |         |          |      |
|--------|-----------------------------------------------------------------------------------------------------------------------------------------|---------|---|---|---------|----------|------|
| H7BYK1 | tr H7BYK1 H7BYK1_HUMAN Testin (Fragment) OS=Homo sapiens OX=9606 GN=TES PE=1 SV=1                                                       | TES     | 1 | 1 | 8.850%  | 21878.26 | 7.9  |
| H7BZJ3 | tr H7BZJ3 H7BZJ3_HUMAN Protein disulfide-isomerase A3 (Fragment) OS=Homo sapiens OX=9606 GN=PDIA3 PE=1 SV=1                             | PDIA3   | 1 | 1 | 11.380% | 13519.17 | 6.79 |
| H7BZX9 | tr H7BZX9 H7BZX9_HUMAN Polypeptide N-acetylgalactosaminyltransferase 17 (Fragment) OS=Homo sapiens OX=9606 GN=GALNT17 PE=1 SV=1         | GALNT17 | 1 | 1 | 2.660%  | 20875.65 | 5.77 |
| H7C0E7 | tr H7C0E7 H7C0E7_HUMAN Protein ARV1 (Fragment) OS=Homo sapiens OX=9606 GN=ARV1 PE=1 SV=1                                                | ARV1    | 1 | 1 | 3.090%  | 33110.34 | 8.46 |
| H7C102 | tr H7C102 H7C102_HUMAN Mucin-20 (Fragment) OS=Homo sapiens OX=9606 GN=MUC20 PE=1 SV=1                                                   | MUC20   | 1 | 1 | 7.030%  | 13314.99 | 9.97 |
| H7C1U0 | tr H7C1U0 H7C1U0_HUMAN Acylamino-acid-releasing enzyme (Fragment) OS=Homo sapiens OX=9606 GN=APEH PE=1 SV=1                             | APEH    | 1 | 1 | 1.950%  | 34582.96 | 6.1  |
| H7C204 | tr H7C204 H7C204_HUMAN Rabenosyn-5 (Fragment) OS=Homo sapiens OX=9606 GN=RBSN PE=1 SV=1                                                 | RBSN    | 1 | 1 | 4.490%  | 18255.98 | 8.49 |
| H7C2F9 | tr H7C2F9 H7C2F9_HUMAN R3H domain-containing protein 1 (Fragment) OS=Homo sapiens OX=9606 GN=R3HDM1 PE=1 SV=1                           | R3HDM1  | 1 | 1 | 2.460%  | 33120.67 | 5.61 |
| H7C2M5 | tr H7C2M5 H7C2M5_HUMAN Radial spoke head 14 homolog (Fragment) OS=Homo sapiens OX=9606 GN=RSPH14 PE=1 SV=1                              | RSPH14  | 1 | 1 | 16.420% | 7402.49  | 8.99 |
| H7C3C1 | tr H7C3C1 H7C3C1_HUMAN Interleukin-1 receptor-associated kinase 1 (Fragment) OS=Homo sapiens OX=9606 GN=IRAK1 PE=1 SV=1                 | IRAK1   | 1 | 1 | 2.750%  | 22566.91 | 5.54 |
| H7C3C5 | tr H7C3C5 H7C3C5_HUMAN Polyribonucleotide nucleotidyltransferase 1, mitochondrial (Fragment) OS=Homo sapiens OX=9606 GN=PNPT1 PE=1 SV=1 | PNPT1   | 1 | 1 | 6.470%  | 15862.12 | 5.09 |
| H7C3N7 | tr H7C3N7 H7C3N7_HUMAN TP53-binding protein 1 (Fragment) OS=Homo sapiens OX=9606 GN=TP53BP1 PE=1 SV=1                                   | TP53BP1 | 1 | 1 | 4.690%  | 20771.69 | 4.56 |
| H7C4F6 | tr H7C4F6 H7C4F6_HUMAN Importin subunit alpha OS=Homo sapiens OX=9606 GN=KPNA4 PE=1 SV=2                                                | KPNA4   | 1 | 1 | 3.320%  | 56836.13 | 4.97 |

|        |                                                                                                                                                         |   |   |         |           |       |
|--------|---------------------------------------------------------------------------------------------------------------------------------------------------------|---|---|---------|-----------|-------|
| H7C5G6 | tr H7C5G6 H7C5G6_HUMAN Uncharacterized protein<br>KIAA2012 OS=Homo sapiens OX=9606 GN=KIAA2012 PE=1 KIAA2012<br>SV=8                                    | 1 | 1 | 0.510%  | 136119.6  | 8.09  |
| H7C5N0 | tr H7C5N0 H7C5N0_HUMAN Helicase SKI2W (Fragment) SKIV2L<br>OS=Homo sapiens OX=9606 GN=SKIV2L PE=1 SV=1                                                  | 1 | 1 | 10.260% | 16873.23  | 6.09  |
| H9KV28 | tr H9KV28 H9KV28_HUMAN Protein diaphanous homolog 1 DIAPH1<br>OS=Homo sapiens OX=9606 GN=DIAPH1 PE=1 SV=2                                               | 1 | 1 | 0.900%  | 136850.66 | 5.16  |
| I3L0S1 | tr I3L0S1 I3L0S1_HUMAN Phosphoribosyl pyrophosphate<br>synthase-associated protein 2 (Fragment) OS=Homo sapiens PRPSAP2<br>OX=9606 GN=PRPSAP2 PE=1 SV=1 | 1 | 1 | 5.380%  | 28638.44  | 5.38  |
| I3L1L6 | tr I3L1L6 I3L1L6_HUMAN RNA helicase (Fragment) OS=Homo sapiens<br>OX=9606 GN=DHX33 PE=1 SV=1 DHX33                                                      | 1 | 1 | 1.620%  | 69255.09  | 8.45  |
| I3L203 | tr I3L203 I3L203_HUMAN Misshapen-like kinase 1 (Fragment) MINK1<br>OS=Homo sapiens OX=9606 GN=MINK1 PE=4 SV=1                                           | 1 | 1 | 13.210% | 5528.3    | 5.58  |
| I3L2C7 | tr I3L2C7 I3L2C7_HUMAN Gem-associated protein 4 GEMIN4<br>OS=Homo sapiens OX=9606 GN=GEMIN4 PE=1 SV=1                                                   | 1 | 1 | 1.050%  | 118820.58 | 5.81  |
| I3L362 | tr I3L362 I3L362_HUMAN RNA N6-adenosine-<br>methyltransferase METTL16 OS=Homo sapiens OX=9606 METTL16<br>GN=METTL16 PE=1 SV=1                           | 1 | 1 | 2.980%  | 18979.52  | 8.72  |
| I3L390 | tr I3L390 I3L390_HUMAN Telomerase-binding protein EST1A<br>(Fragment) OS=Homo sapiens OX=9606 GN=SMG6 PE=1 SMG6<br>SV=2                                 | 1 | 1 | 2.880%  | 23279.22  | 4.38  |
| I3L3P8 | tr I3L3P8 I3L3P8_HUMAN Rabankyrin-5 OS=Homo sapiens ANKFY1<br>OX=9606 GN=ANKFY1 PE=1 SV=1                                                               | 1 | 1 | 14.490% | 8017.2    | 5.82  |
| J3KNQ2 | tr J3KNQ2 J3KNQ2_HUMAN Fibronectin type III domain-<br>containing protein 1 (Fragment) OS=Homo sapiens OX=9606 FNDC1<br>GN=FNDC1 PE=1 SV=1              | 1 | 1 | 0.340%  | 194428.47 | 9.25  |
| J3KR05 | tr J3KR05 J3KR05_HUMAN Protein cordon-bleu (Fragment) COBL<br>OS=Homo sapiens OX=9606 GN=COBL PE=1 SV=1                                                 | 1 | 1 | 0.790%  | 122452.39 | 6.3   |
| J3KRT0 | tr J3KRT0 J3KRT0_HUMAN Core-binding factor subunit beta<br>(Fragment) OS=Homo sapiens OX=9606 GN=CBFB PE=1 CBFB<br>SV=2                                 | 1 | 1 | 2.530%  | 22521.51  | 11.98 |



|        |                                                                                                                                  |   |   |         |          |       |
|--------|----------------------------------------------------------------------------------------------------------------------------------|---|---|---------|----------|-------|
| J3QKW7 | tr J3QKW7 J3QKW7_HUMAN Developmentally-regulated GTP-binding protein 2 OS=Homo sapiens OX=9606 GN=DRG2 PE=1 DRG2 SV=1            | 1 | 1 | 2.870%  | 26623.76 | 9.55  |
| J3QSB5 | tr J3QSB5 J3QSB5_HUMAN 60S ribosomal protein L36 RPL36 OS=Homo sapiens OX=9606 GN=RPL36 PE=1 SV=1                                | 1 | 1 | 10.640% | 10788.73 | 11.61 |
| J3QW41 | tr J3QW41 J3QW41_HUMAN cDNA FLJ50748, highly similar to Rho GDP-dissociation inhibitor 1 OS=Homo sapiens OX=9606 PE=2 SV=1       | 1 | 1 | 3.370%  | 20326.63 | 5.12  |
| J7HWJ8 | tr J7HWJ8 J7HWJ8_HUMAN Cytochrome b OS=Homo sapiens OX=9606 GN=CYTB PE=3 SV=1                                                    | 1 | 1 | 1.840%  | 42585    | 7.83  |
| K4P1Y1 | tr K4P1Y1 K4P1Y1_HUMAN Organic anion transporting polypeptide (Fragment) OS=Homo sapiens OX=9606 GN=SLCO1B1 PE=4 SV=1            | 1 | 1 | 4.790%  | 20774.09 | 9.21  |
| K7EIW9 | tr K7EIW9 K7EIW9_HUMAN Pleckstrin homology domain-containing family J member 1 OS=Homo sapiens OX=9606 GN=PLEKHJ1 PE=1 SV=1      | 1 | 1 | 4.670%  | 16959.44 | 11.17 |
| K7EK20 | tr K7EK20 K7EK20_HUMAN Coactivator-associated arginine methyltransferase 1 (Fragment) OS=Homo sapiens OX=9606 GN=CARM1 PE=1 SV=1 | 1 | 1 | 10.830% | 12542.88 | 6.26  |
| K7EM56 | tr K7EM56 K7EM56_HUMAN 40S ribosomal protein S15 RPS15 OS=Homo sapiens OX=9606 GN=RPS15 PE=1 SV=2                                | 1 | 1 | 4.460%  | 12990.28 | 10.88 |
| K7EMU8 | tr K7EMU8 K7EMU8_HUMAN DNA (cytosine-5)-methyltransferase 1 OS=Homo sapiens OX=9606 GN=DNMT1 PE=1 SV=1                           | 1 | 1 | 10.110% | 10283.95 | 7.71  |
| K7EPJ5 | tr K7EPJ5 K7EPJ5_HUMAN E3 ubiquitin-protein ligase MGRN1 (Fragment) OS=Homo sapiens OX=9606 GN=MGRN1 PE=1 SV=1                   | 1 | 1 | 1.680%  | 65083.12 | 5.39  |
| K7EPT8 | tr K7EPT8 K7EPT8_HUMAN Glial fibrillary acidic protein (Fragment) OS=Homo sapiens OX=9606 GN=GFAP PE=1 SV=2                      | 1 | 1 | 14.670% | 8266.39  | 9.87  |
| K7ER00 | tr K7ER00 K7ER00_HUMAN Phenylalanine--tRNA ligase OS=Homo sapiens OX=9606 GN=FARSA PE=1 SV=1                                     | 1 | 1 | 2.550%  | 62394.53 | 7.37  |
| K7ERC0 | tr K7ERC0 K7ERC0_HUMAN Cilia- and flagella-associated protein 52 (Fragment) OS=Homo sapiens OX=9606 GN=CFAP52 PE=1 SV=1          | 1 | 1 | 10.750% | 10720.4  | 8.7   |

|        |                                                                                                                                          |   |   |         |          |       |
|--------|------------------------------------------------------------------------------------------------------------------------------------------|---|---|---------|----------|-------|
| K7ERT2 | tr K7ERT2 K7ERT2_HUMAN Mitogen-activated protein kinase kinase kinase 1 (Fragment) OS=Homo sapiens OX=9606 MAP4K1 GN=MAP4K1 PE=1 SV=1    | 1 | 1 | 10.140% | 7415.5   | 4.64  |
| K7ES30 | tr K7ES30 K7ES30_HUMAN Zinc finger protein 180 OS=Homo sapiens OX=9606 GN=ZNF180 PE=4 SV=2                                               | 1 | 1 | 15.380% | 7345.52  | 12.01 |
| K7ESD3 | tr K7ESD3 K7ESD3_HUMAN Zinc finger and SCAN domain-containing protein 5B (Fragment) OS=Homo sapiens OX=9606 ZSCAN5B GN=ZSCAN5B PE=4 SV=2 | 1 | 1 | 7.300%  | 15767.93 | 6.08  |
| L0R5D0 | tr L0R5D0 L0R5D0_HUMAN Alternative protein SRGAP1 OS=Homo sapiens OX=9606 GN=SRGAP1 PE=4 SV=1                                            | 1 | 1 | 12.050% | 9230.77  | 9.45  |
| L8EBE5 | tr L8EBE5 L8EBE5_HUMAN Alternative protein SPRED1 OS=Homo sapiens OX=9606 GN=SPRED1 PE=4 SV=1                                            | 1 | 1 | 7.890%  | 8378.11  | 9.4   |
| M0QXE6 | tr M0QXE6 M0QXE6_HUMAN DNA-directed DNA polymerase (Fragment) OS=Homo sapiens OX=9606 GN=POLD1 PE=1 SV=1                                 | 1 | 1 | 3.460%  | 31660.2  | 8.49  |
| M0QYD4 | tr M0QYD4 M0QYD4_HUMAN Putative L-aspartate dehydrogenase (Fragment) OS=Homo sapiens OX=9606 ASPDH GN=ASPDH PE=1 SV=1                    | 1 | 1 | 11.760% | 5473.19  | 9.69  |
| M0QYZ2 | tr M0QYZ2 M0QYZ2_HUMAN AP complex subunit sigma OS=Homo sapiens OX=9606 GN=AP2S1 PE=1 SV=1                                               | 1 | 1 | 5.060%  | 18928.78 | 7.66  |
| M0R1W7 | tr M0R1W7 M0R1W7_HUMAN Uncharacterized protein (Fragment) OS=Homo sapiens OX=9606 PE=4 SV=1                                              | 1 | 1 | 11.110% | 7546.45  | 4.82  |
| M0R2J6 | tr M0R2J6 M0R2J6_HUMAN Zinc finger protein 548 OS=Homo sapiens OX=9606 GN=ZNF548 PE=4 SV=1                                               | 1 | 1 | 23.400% | 5583.1   | 6.56  |
| M0R3G9 | tr M0R3G9 M0R3G9_HUMAN 5'-3' exonuclease (Fragment) OS=Homo sapiens OX=9606 GN=PLD3 PE=1 SV=1                                            | 1 | 1 | 7.040%  | 7657.24  | 4.7   |
| O43455 | tr O43455 O43455_HUMAN Uncharacterized protein (Fragment) OS=Homo sapiens OX=9606 PE=4 SV=1                                              | 1 | 1 | 8.990%  | 10023.35 | 5.4   |
| Q05BG9 | tr Q05BG9 Q05BG9_HUMAN P2X purinoceptor OS=Homo sapiens OX=9606 GN=P2RX6 PE=2 SV=1                                                       | 1 | 1 | 1.800%  | 43214.57 | 6.59  |

|        |                                                                                                                        |         |   |   |        |           |       |
|--------|------------------------------------------------------------------------------------------------------------------------|---------|---|---|--------|-----------|-------|
| Q05CP8 | tr Q05CP8 Q05CP8_HUMAN CCDC6 protein (Fragment)<br>OS=Homo sapiens OX=9606 GN=CCDC6 PE=2 SV=1                          | CCDC6   | 1 | 1 | 1.800% | 38163.11  | 9.42  |
| Q05DA9 | tr Q05DA9 Q05DA9_HUMAN SFRS17A protein (Fragment)<br>OS=Homo sapiens OX=9606 GN=SFRS17A PE=2 SV=1                      | SFRS17A | 1 | 1 | 3.080% | 33554.28  | 8.49  |
| Q05DB9 | tr Q05DB9 Q05DB9_HUMAN Polynucleotide<br>adenylyltransferase (Fragment) OS=Homo sapiens OX=9606<br>GN=PAPOLG PE=2 SV=1 | PAPOLG  | 1 | 1 | 1.210% | 57003.78  | 8.85  |
| Q05DM0 | tr Q05DM0 Q05DM0_HUMAN HMMR protein (Fragment)<br>OS=Homo sapiens OX=9606 GN=HMMR PE=2 SV=1                            | HMMR    | 1 | 1 | 3.910% | 59164.58  | 5.62  |
| Q12984 | tr Q12984 Q12984_HUMAN Uncharacterized protein OS=Homo<br>sapiens OX=9606 PE=4 SV=1                                    |         | 1 | 1 | 1.730% | 40903.01  | 11.42 |
| Q13537 | tr Q13537 Q13537_HUMAN Putative transposase OS=Homo<br>sapiens OX=9606 PE=4 SV=2                                       |         | 1 | 1 | 2.420% | 51665.88  | 8.89  |
| Q13590 | tr Q13590 Q13590_HUMAN Uncharacterized protein<br>(Fragment) OS=Homo sapiens OX=9606 PE=2 SV=1                         |         | 1 | 1 | 7.020% | 12634.76  | 10.3  |
| Q2NLC9 | tr Q2NLC9 Q2NLC9_HUMAN PURA protein (Fragment)<br>OS=Homo sapiens OX=9606 GN=PURA PE=2 SV=1                            | PURA    | 1 | 1 | 3.000% | 34165.96  | 9.3   |
| Q2XND8 | tr Q2XND8 Q2XND8_HUMAN Cytochrome P450 OS=Homo<br>sapiens OX=9606 GN=CYP2D6 PE=3 SV=1                                  | CYP2D6  | 1 | 1 | 1.610% | 55775.85  | 6.61  |
| Q495F8 | tr Q495F8 Q495F8_HUMAN Ubiquitin carboxyl-terminal<br>hydrolase OS=Homo sapiens OX=9606 GN=USP26 PE=2 SV=1             | USP26   | 1 | 1 | 0.770% | 103996.83 | 8.91  |
| Q49AK0 | tr Q49AK0 Q49AK0_HUMAN LTA4H protein OS=Homo sapiens<br>OX=9606 GN=LTA4H PE=2 SV=1                                     | LTA4H   | 1 | 1 | 8.720% | 17202.64  | 8.95  |
| Q4VBY4 | tr Q4VBY4 Q4VBY4_HUMAN MAP1B protein (Fragment)<br>OS=Homo sapiens OX=9606 GN=MAP1B PE=2 SV=1                          | MAP1B   | 1 | 1 | 1.380% | 82059.63  | 8.68  |
| Q504W7 | tr Q504W7 Q504W7_HUMAN Phosphoinositide 5-phosphatase<br>OS=Homo sapiens OX=9606 GN=OCRL PE=2 SV=1                     | OCRL    | 1 | 1 | 1.120% | 103179.38 | 6.34  |

|        |                                                                                                                                                                          |       |   |   |        |           |      |
|--------|--------------------------------------------------------------------------------------------------------------------------------------------------------------------------|-------|---|---|--------|-----------|------|
| Q506M0 | tr Q506M0 Q506M0_HUMAN Regulator of G-protein signalling<br>12 OS=Homo sapiens OX=9606 GN=RGS12 PE=2 SV=1                                                                | RGS12 | 1 | 1 | 0.990% | 76757.2   | 8.3  |
| Q50L08 | tr Q50L08 Q50L08_HUMAN Bitter taste receptor T2R1<br>(Fragment) OS=Homo sapiens OX=9606 GN=Hosa(Japanese)-Hosa(Japan<br>T2R1 PE=3 SV=1                                   |       | 1 | 1 | 2.790% | 28844.79  | 9.82 |
| Q53GE1 | tr Q53GE1 Q53GE1_HUMAN RAN binding protein 3 isoform<br>RANBP3-a variant (Fragment) OS=Homo sapiens OX=9606<br>PE=2 SV=1                                                 |       | 1 | 1 | 1.070% | 59674.58  | 4.71 |
| Q562F2 | tr Q562F2 Q562F2_HUMAN Serine/threonine-protein<br>phosphatase 2A 56 kDa regulatory subunit OS=Homo sapiens PPP2R5E<br>OX=9606 GN=PPP2R5E PE=2 SV=1                      |       | 1 | 1 | 1.930% | 54680.71  | 6.51 |
| Q59EV6 | tr Q59EV6 Q59EV6_HUMAN Carboxypeptidase (Fragment)<br>OS=Homo sapiens OX=9606 GN=PPGB PE=1 SV=1                                                                          | PPGB  | 1 | 1 | 1.210% | 56119.18  | 6.17 |
| Q59F74 | tr Q59F74 Q59F74_HUMAN CD72 antigen variant (Fragment)<br>OS=Homo sapiens OX=9606 PE=2 SV=1                                                                              |       | 1 | 1 | 8.640% | 8500.52   | 5.21 |
| Q59FM0 | tr Q59FM0 Q59FM0_HUMAN Complex I-42kD (Fragment)<br>OS=Homo sapiens OX=9606 PE=2 SV=1                                                                                    |       | 1 | 1 | 3.730% | 27039.66  | 9.12 |
| Q59FV6 | tr Q59FV6 Q59FV6_HUMAN Actin-like protein 3 (Fragment)<br>OS=Homo sapiens OX=9606 PE=2 SV=1                                                                              |       | 1 | 1 | 1.900% | 42257.78  | 5.59 |
| Q59G16 | tr Q59G16 Q59G16_HUMAN SWI/SNF-related matrix-<br>associated actin-dependent regulator of chromatin c2 isoform b<br>variant (Fragment) OS=Homo sapiens OX=9606 PE=2 SV=1 |       | 1 | 1 | 0.950% | 127375.36 | 5.38 |
| Q59G42 | tr Q59G42 Q59G42_HUMAN Eukaryotic translation initiation<br>factor 4 gamma, 2 variant (Fragment) OS=Homo sapiens<br>OX=9606 PE=2 SV=1                                    |       | 1 | 1 | 1.060% | 105826.89 | 7.08 |
| Q59GS6 | tr Q59GS6 Q59GS6_HUMAN Diacylglycerol kinase (Fragment)<br>OS=Homo sapiens OX=9606 PE=2 SV=1                                                                             |       | 1 | 1 | 2.640% | 68332.02  | 5.7  |
| Q59HG5 | tr Q59HG5 Q59HG5_HUMAN Zinc finger protein 192 variant<br>(Fragment) OS=Homo sapiens OX=9606 PE=2 SV=1                                                                   |       | 1 | 1 | 3.170% | 49854.25  | 8.92 |
| Q5JPB9 | tr Q5JPB9 Q5JPB9_HUMAN Uncharacterized protein<br>DKFZp686N2317 (Fragment) OS=Homo sapiens OX=9606 DKFZp686N<br>GN=DKFZp686N2317 PE=2 SV=1                               |       | 1 | 1 | 7.000% | 11768.46  | 8.89 |

|        |                                                                                                                            |               |   |   |        |           |       |
|--------|----------------------------------------------------------------------------------------------------------------------------|---------------|---|---|--------|-----------|-------|
| Q5JRC6 | tr Q5JRC6 Q5JRC6_HUMAN PHD finger protein 6 OS=Homo sapiens OX=9606 GN=PHF6 PE=1 SV=1                                      | PHF6          | 1 | 1 | 2.780% | 36430.04  | 9.24  |
| Q5M7Z5 | tr Q5M7Z5 Q5M7Z5_HUMAN GRHPR protein (Fragment) OS=Homo sapiens OX=9606 GN=GRHPR PE=2 SV=1                                 | GRHPR         | 1 | 1 | 2.930% | 36823.76  | 5.95  |
| Q5QPM7 | tr Q5QPM7 Q5QPM7_HUMAN Proteasome inhibitor PI31 subunit OS=Homo sapiens OX=9606 GN=PSMF1 PE=1 SV=2                        | PSMF1         | 1 | 1 | 6.460% | 28956.43  | 5.98  |
| Q5RLJ0 | tr Q5RLJ0 Q5RLJ0_HUMAN RNA transcription, translation and transport factor protein OS=Homo sapiens OX=9606 PE=2 SV=1       |               | 1 | 1 | 3.280% | 27968.6   | 6     |
| Q5T0F3 | tr Q5T0F3 Q5T0F3_HUMAN Nucleolar GTP-binding protein 2 OS=Homo sapiens OX=9606 GN=GNL2 PE=2 SV=1                           | GNL2          | 1 | 1 | 1.780% | 83653.92  | 9.27  |
| Q5TA58 | tr Q5TA58 Q5TA58_HUMAN Protein argonaute-1 OS=Homo sapiens OX=9606 GN=AGO1 PE=1 SV=1                                       | AGO1          | 1 | 1 | 1.020% | 88877.66  | 9.31  |
| Q5TEE2 | tr Q5TEE2 Q5TEE2_HUMAN Histone deacetylase (Fragment) OS=Homo sapiens OX=9606 GN=HDAC1 PE=1 SV=1                           | HDAC1         | 1 | 1 | 4.270% | 24544.41  | 8.33  |
| Q5U0K8 | tr Q5U0K8 Q5U0K8_HUMAN Sodium channel, voltage-gated, type II, beta OS=Homo sapiens OX=9606 GN=SCN2B PE=2 SV=1             | SCN2B         | 1 | 1 | 2.330% | 24325.59  | 5.98  |
| Q66K91 | tr Q66K91 Q66K91_HUMAN Small nuclear ribonucleoprotein-associated protein OS=Homo sapiens OX=9606 GN=SNRPB PE=1 SV=1       | SNRPB         | 1 | 1 | 3.030% | 23655.74  | 10.91 |
| Q68CX1 | tr Q68CX1 Q68CX1_HUMAN Uncharacterized protein DKFZp761D0422 (Fragment) OS=Homo sapiens OX=9606 GN=DKFZp761D0422 PE=2 SV=1 | DKFZp761D0422 | 1 | 1 | 1.200% | 93226.88  | 5.76  |
| Q68DB7 | tr Q68DB7 Q68DB7_HUMAN Mothers against decapentaplegic homolog OS=Homo sapiens OX=9606 GN=DKFZp781O1323 PE=2 SV=1          | DKFZp781O1323 | 1 | 1 | 2.150% | 52257.68  | 7.63  |
| Q6AI59 | tr Q6AI59 Q6AI59_HUMAN Uncharacterized protein DKFZp781H0795 (Fragment) OS=Homo sapiens OX=9606 GN=DKFZp781H0795 PE=2 SV=1 | DKFZp781H0795 | 1 | 1 | 0.920% | 192922.34 | 8.63  |
| Q6AZW6 | tr Q6AZW6 Q6AZW6_HUMAN Activating transcription factor 6 beta OS=Homo sapiens OX=9606 GN=ATF6B PE=2 SV=1                   | ATF6B         | 1 | 1 | 2.420% | 76720.35  | 5.9   |

|        |                                                                                                     |                                                                                           |   |   |         |           |      |
|--------|-----------------------------------------------------------------------------------------------------|-------------------------------------------------------------------------------------------|---|---|---------|-----------|------|
| Q6DZH8 | tr Q6DZH8 Q6DZH8_HUMAN<br>neuroprotector homeobox OS=Homo sapiens OX=9606 ADNP<br>GN=ADNP PE=2 SV=1 | Activity-dependent                                                                        | 1 | 1 | 1.630%  | 123445.39 | 7.08 |
| Q6FHF5 | tr Q6FHF5 Q6FHF5_HUMAN<br>(Fragment) OS=Homo sapiens OX=9606 GN=PCNA PE=2 PCNA<br>SV=1              | Proliferating cell nuclear antigen                                                        | 1 | 1 | 7.280%  | 28705.38  | 4.57 |
| Q6FHZ7 | tr Q6FHZ7 Q6FHZ7_HUMAN<br>OX=9606 GN=ADFP PE=2 SV=1                                                 | Perilipin ADFP                                                                            | 1 | 1 | 1.600%  | 48074.87  | 6.34 |
| Q6I9T8 | tr Q6I9T8 Q6I9T8_HUMAN<br>SV=1                                                                      | Serine/threonine-protein phosphatase OS=Homo sapiens OX=9606 GN=PPP2CA PE=2 PPP2CA        | 1 | 1 | 2.590%  | 35549.74  | 5.3  |
| Q6IB71 | tr Q6IB71 Q6IB71_HUMAN<br>OS=Homo sapiens OX=9606 GN=PSMA3 PE=2 SV=1                                | Proteasome subunit alpha type PSMA3                                                       | 1 | 1 | 4.710%  | 28414.88  | 5.19 |
| Q6IEG3 | tr Q6IEG3 Q6IEG3_HUMAN<br>CRA_a OS=Homo sapiens OX=9606 GN=PDCD7 PE=2 SV=1                          | Programmed cell death 7, isoform PDCD7                                                    | 1 | 1 | 1.440%  | 54699.29  | 9.97 |
| Q6IRT1 | tr Q6IRT1 Q6IRT1_HUMAN<br>SV=2                                                                      | S-(hydroxymethyl)glutathione dehydrogenase OS=Homo sapiens OX=9606 GN=ADH5 PE=2 ADH5      | 1 | 1 | 1.870%  | 39723.81  | 7.45 |
| Q6LBZ0 | tr Q6LBZ0 Q6LBZ0_HUMAN<br>sapiens OX=9606 PE=3 SV=1                                                 | Proto-oncogene c-sis for PDGF B chain (platelet-derived growth factor) (Fragment) OS=Homo | 1 | 1 | 21.430% | 4708.18   | 4.44 |
| Q6MZV5 | tr Q6MZV5 Q6MZV5_HUMAN<br>SV=1                                                                      | Coatmer subunit delta OS=Homo sapiens OX=9606 GN=DKFZp686M09245 PE=2 DKFZp686M            | 1 | 1 | 1.990%  | 61597.56  | 5.63 |
| Q6N0B1 | tr Q6N0B1 Q6N0B1_HUMAN<br>GN=DKFZp686D0880 PE=2 SV=1                                                | Succinate-CoA ligase subunit beta (Fragment) OS=Homo sapiens OX=9606 DKFZp686D            | 1 | 1 | 1.480%  | 51199.53  | 6.26 |
| Q6NWZ1 | tr Q6NWZ1 Q6NWZ1_HUMAN<br>OS=Homo sapiens OX=9606 GN=CKAP4 PE=2 SV=1                                | CKAP4 protein (Fragment) CKAP4                                                            | 1 | 1 | 2.000%  | 67817.36  | 9.34 |
| Q6T775 | tr Q6T775 Q6T775_HUMAN<br>OS=Homo sapiens OX=9606 GN=KLK2 PE=2 SV=1                                 | Kallikrein 2 isoform 5 preproprotein KLK2                                                 | 1 | 1 | 3.330%  | 19672.19  | 5.73 |
| Q6ZU41 | tr Q6ZU41 Q6ZU41_HUMAN<br>cytomatrix protein (Pclo) OS=Homo sapiens OX=9606 PE=2                    | cDNA FLJ44011 fis, clone TEST14024420, highly similar to Rattus norvegicus presynaptic    | 1 | 1 | 0.890%  | 113426.69 | 9.1  |

SV=1

|        |                                                                                                                                |   |   |         |           |       |
|--------|--------------------------------------------------------------------------------------------------------------------------------|---|---|---------|-----------|-------|
| Q6ZUY9 | tr Q6ZUY9 Q6ZUY9_HUMAN cDNA FLJ43200 fis, clone FEBRA2007793 OS=Homo sapiens OX=9606 PE=2 SV=1                                 | 1 | 1 | 4.260%  | 20707.57  | 11.65 |
| Q71VF8 | tr Q71VF8 Q71VF8_HUMAN Beta-spectrin (Fragment) HSpTB1 OS=Homo sapiens OX=9606 GN=HSpTB1 PE=4 SV=1                             | 1 | 1 | 5.410%  | 13034.65  | 5.8   |
| Q7L2M4 | tr Q7L2M4 Q7L2M4_HUMAN Transmembrane channel-like protein (Fragment) OS=Homo sapiens OX=9606 GN=TMC6 TMC6 PE=2 SV=1            | 1 | 1 | 2.340%  | 57780.33  | 8.89  |
| Q86TA8 | tr Q86TA8 Q86TA8_HUMAN Uncharacterized protein DKFZp451M091 OS=Homo sapiens OX=9606 DKFZp451M GN=DKFZp451M091 PE=2 SV=1        | 1 | 1 | 1.200%  | 131650.48 | 5.68  |
| Q8IXF7 | tr Q8IXF7 Q8IXF7_HUMAN HAWMS1 protein OS=Homo sapiens OX=9606 GN=hAWMS1 PE=2 SV=1 hAWMS1                                       | 1 | 1 | 11.430% | 8389.94   | 10.13 |
| Q8IY71 | tr Q8IY71 Q8IY71_HUMAN MRPS17 protein (Fragment) OS=Homo sapiens OX=9606 GN=MRPS17 PE=2 SV=1 MRPS17                            | 1 | 1 | 6.340%  | 15707.17  | 9.86  |
| Q8NAY2 | tr Q8NAY2 Q8NAY2_HUMAN cDNA FLJ34557 fis, clone KIDNE2001160 OS=Homo sapiens OX=9606 PE=2 SV=1                                 | 1 | 1 | 8.960%  | 14098.95  | 9.67  |
| Q8NC75 | tr Q8NC75 Q8NC75_HUMAN cDNA FLJ90437 fis, clone NT2RP3000838, weakly similar to TRICHOHYALIN OS=Homo sapiens OX=9606 PE=2 SV=1 | 1 | 1 | 1.140%  | 69847.39  | 8.92  |
| Q8NGM3 | tr Q8NGM3 Q8NGM3_HUMAN HCG1641819 OS=Homo sapiens OX=9606 GN=hCG_1641819 PE=4 SV=1 hCG_16418                                   | 1 | 1 | 5.150%  | 22151.91  | 9.17  |
| Q8TE01 | tr Q8TE01 Q8TE01_HUMAN DERP12 (Dermal papilla derived protein 12) OS=Homo sapiens OX=9606 GN=derp12 PE=2 derp12 SV=1           | 1 | 1 | 3.500%  | 38192.09  | 6.2   |
| Q8TEF1 | tr Q8TEF1 Q8TEF1_HUMAN FLJ00246 protein (Fragment) OS=Homo sapiens OX=9606 GN=FLJ00246 PE=2 SV=1 FLJ00246                      | 1 | 1 | 0.400%  | 157809.37 | 4.96  |
| Q8WYY4 | tr Q8WYY4 Q8WYY4_HUMAN Uncharacterized protein OS=Homo sapiens OX=9606 PE=2 SV=1                                               | 1 | 1 | 7.630%  | 12929.9   | 11.47 |

|        |                                                                                                                                                          |   |   |         |          |       |
|--------|----------------------------------------------------------------------------------------------------------------------------------------------------------|---|---|---------|----------|-------|
| Q96CQ6 | tr Q96CQ6 Q96CQ6_HUMAN Uncharacterized protein (Fragment) OS=Homo sapiens OX=9606 PE=2 SV=1                                                              | 1 | 1 | 14.750% | 6848.73  | 5.41  |
| Q96G78 | tr Q96G78 Q96G78_HUMAN EXOSC10 protein (Fragment) OS=Homo sapiens OX=9606 GN=EXOSC10 PE=2 SV=2                                                           | 1 | 1 | 14.750% | 6964.16  | 12.01 |
| Q96J05 | tr Q96J05 Q96J05_HUMAN ECT2 protein OS=Homo sapiens OX=9606 PE=2 SV=1                                                                                    | 1 | 1 | 4.400%  | 20333.08 | 9.79  |
| Q96NY3 | tr Q96NY3 Q96NY3_HUMAN DnaJ-like protein (Fragment) OS=Homo sapiens OX=9606 PE=2 SV=1                                                                    | 1 | 1 | 2.910%  | 31474.69 | 5.63  |
| Q9H2I3 | tr Q9H2I3 Q9H2I3_HUMAN DC41 OS=Homo sapiens OX=9606 PE=2 SV=1                                                                                            | 1 | 1 | 6.860%  | 12540.99 | 9.7   |
| Q9H2M6 | tr Q9H2M6 Q9H2M6_HUMAN DC30 OS=Homo sapiens OX=9606 PE=2 SV=1                                                                                            | 1 | 1 | 7.080%  | 13295.75 | 9.94  |
| Q9H9M0 | tr Q9H9M0 Q9H9M0_HUMAN cDNA FLJ12662 fis, clone NT2RM4002205, moderately similar to ELONGATION FACTOR G, MITOCHONDRIAL OS=Homo sapiens OX=9606 PE=2 SV=1 | 1 | 1 | 4.170%  | 16660.15 | 9.48  |
| Q9NTA6 | tr Q9NTA6 Q9NTA6_HUMAN Uncharacterized protein DKFZp761I2124 (Fragment) OS=Homo sapiens OX=9606 GN=DKFZp761I2124 PE=2 SV=1                               | 1 | 1 | 1.010%  | 69294.44 | 5.84  |
| Q9NXX9 | tr Q9NXX9 Q9NXX9_HUMAN cDNA FLJ20187 fis, clone COLF0433 OS=Homo sapiens OX=9606 PE=2 SV=1                                                               | 1 | 1 | 3.290%  | 27831.02 | 5.47  |
| Q9UES5 | tr Q9UES5 Q9UES5_HUMAN Myosin V (Fragment) OS=Homo sapiens OX=9606 GN=MYO5A PE=1 SV=1                                                                    | 1 | 1 | 3.950%  | 26456.44 | 5.13  |
| R4GNG6 | tr R4GNG6 R4GNG6_HUMAN Ubiquitin-conjugating enzyme E2 E3 OS=Homo sapiens OX=9606 GN=UBE2E3 PE=1 SV=1                                                    | 1 | 1 | 5.380%  | 14140.54 | 4.99  |
| R9Y4B7 | tr R9Y4B7 R9Y4B7_HUMAN NADH-ubiquinone oxidoreductase chain 5 OS=Homo sapiens OX=9606 GN=ND5 PE=3 SV=1                                                   | 1 | 1 | 1.000%  | 64757    | 8.99  |
| V5L5K8 | tr V5L5K8 V5L5K8_HUMAN MHC class I antigen (Fragment) OS=Homo sapiens OX=9606 GN=HLA-B PE=3 SV=1                                                         | 1 | 1 | 7.590%  | 8995.85  | 5.31  |



|            |                                                                                                                                    |   |   |         |           |       |
|------------|------------------------------------------------------------------------------------------------------------------------------------|---|---|---------|-----------|-------|
| V9GY20     | tr V9GY20 V9GY20_HUMAN Transmembrane prolyl 4-hydroxylase (Fragment) OS=Homo sapiens OX=9606 P4HTM GN=P4HTM PE=1 SV=1              | 1 | 1 | 8.280%  | 17843.82  | 4.82  |
| V9HW06     | tr V9HW06 V9HW06_HUMAN Serine hydroxymethyltransferase OS=Homo sapiens OX=9606 GN=HEL-S-51e PE=2 SV=1                              | 1 | 1 | 1.190%  | 55992.33  | 8.76  |
| V9HW90     | tr V9HW90 V9HW90_HUMAN Glutathione reductase OS=Homo sapiens OX=9606 GN=HEL-75 PE=2 SV=1                                           | 1 | 1 | 2.300%  | 56256.4   | 8.74  |
| V9HWA9     | tr V9HWA9 V9HWA9_HUMAN C3-beta-c OS=Homo sapiens OX=9606 GN=HEL-S-62p PE=2 SV=1                                                    | 1 | 1 | 0.360%  | 187145.88 | 6.02  |
| V9P4H4     | tr V9P4H4 V9P4H4_HUMAN Magi1d OS=Homo sapiens OX=9606 PE=2 SV=1                                                                    | 1 | 1 | 0.460%  | 144697.26 | 7.46  |
| H0YBL3     | tr H0YBL3 H0YBL3_HUMAN Protein MTSS 1 (Fragment) OS=Homo sapiens OX=9606 GN=MTSS1 PE=1 SV=1                                        | 5 | 1 | 3.800%  | 20726.63  | 9.56  |
| A0A5C2GDU5 | tr A0A5C2GDU5 A0A5C2GDU5_HUMAN IG c1004_heavy_IGHV3-15_IGHD2-2_IGHJ5 (Fragment) OS=Homo sapiens OX=9606 PE=2 SV=1                  | 4 | 1 | 12.610% | 12921.36  | 9.01  |
| A0A5C2GPP2 | tr A0A5C2GPP2 A0A5C2GPP2_HUMAN IG c833_heavy_IGHV4-39_IGHD2-2_IGHJ2 (Fragment) OS=Homo sapiens OX=9606 PE=2 SV=1                   | 4 | 1 | 4.100%  | 13496.78  | 5.09  |
| A0A0A0MS14 | sp A0A0A0MS14 HV145_HUMAN Immunoglobulin heavy variable 1-45 OS=Homo sapiens OX=9606 GN=IGHV1-45 PE=3 SV=1                         | 3 | 1 | 9.400%  | 13508.21  | 9.2   |
| A0A075B6Z2 | tr A0A075B6Z2 A0A075B6Z2_HUMAN T cell receptor alpha joining 56 (Fragment) OS=Homo sapiens OX=9606 TRAJ56 GN=TRAJ56 PE=4 SV=1      | 3 | 1 | 38.100% | 2110.41   | 10.29 |
| A2NWW2     | tr A2NWW2 A2NWW2_HUMAN VH-3 family (VH26)D/J protein (Fragment) OS=Homo sapiens OX=9606 GN=VH-3 family (VH26)D/J PE=4 SV=1         | 3 | 1 | 13.640% | 12195.67  | 7.79  |
| Q6MZT2     | tr Q6MZT2 Q6MZT2_HUMAN Receptor protein-tyrosine kinase OS=Homo sapiens OX=9606 GN=DKFZp686D1354 PE=2 DKFZp686D SV=1               | 3 | 1 | 1.050%  | 96745.25  | 5.2   |
| A0A024R1R8 | tr A0A024R1R8 A0A024R1R8_HUMAN Coiled-coil domain-containing protein 72 OS=Homo sapiens OX=9606 hCG_20147 GN=hCG_2014768 PE=3 SV=1 | 2 | 1 | 12.500% | 7091.31   | 10    |

|            |                                                                                                                                 |                |   |   |         |           |       |
|------------|---------------------------------------------------------------------------------------------------------------------------------|----------------|---|---|---------|-----------|-------|
| A0A0A0MT67 | tr A0A0A0MT67 A0A0A0MT67_HUMAN Mucin-15 OS=Homo sapiens OX=9606 GN=MUC15 PE=1 SV=1                                              | MUC15          | 2 | 1 | 2.220%  | 39327.64  | 5.42  |
| A0A5C2FTW2 | tr A0A5C2FTW2 A0A5C2FTW2_HUMAN c152_light_IGKV1D-13_IGKJ5 (Fragment) OS=Homo sapiens OX=9606 PE=2 SV=1                          | IGL            | 2 | 1 | 14.950% | 11386.59  | 8.02  |
| A0A5C2GML0 | tr A0A5C2GML0 A0A5C2GML0_HUMAN c775_heavy_IGHV3-15_IGHD3-10_IGHJ4 (Fragment) OS=Homo sapiens OX=9606 PE=2 SV=1                  | IG             | 2 | 1 | 11.810% | 13678.37  | 8.65  |
| C9IZL5     | tr C9IZL5 C9IZL5_HUMAN AP-4 complex subunit mu-1 OS=Homo sapiens OX=9606 GN=AP4M1 PE=1 SV=1                                     | AP4M1          | 2 | 1 | 2.770%  | 35742.45  | 8.94  |
| H0YC69     | tr H0YC69 H0YC69_HUMAN Cell cycle and apoptosis regulator protein 2 (Fragment) OS=Homo sapiens OX=9606 GN=CCAR2 CCAR2 PE=1 SV=1 | CCAR2          | 2 | 1 | 6.080%  | 16253.67  | 10.53 |
| J3QLI9     | tr J3QLI9 J3QLI9_HUMAN Small nuclear ribonucleoprotein Sm D1 OS=Homo sapiens OX=9606 GN=SNRPD1 PE=1 SV=1                        | SNRPD1         | 2 | 1 | 17.330% | 8392.64   | 11.83 |
| K7EPH2     | tr K7EPH2 K7EPH2_HUMAN Phenylalanine--tRNA ligase (Fragment) OS=Homo sapiens OX=9606 GN=FARSA PE=1 SV=8                         | FARSA          | 2 | 1 | 1.850%  | 42930.35  | 6.99  |
| Q5HYC4     | tr Q5HYC4 Q5HYC4_HUMAN Uncharacterized protein DKFZp686J08125 (Fragment) OS=Homo sapiens OX=9606 GN=DKFZp686J08125 PE=4 SV=1    | DKFZp686J08125 | 2 | 1 | 2.950%  | 38157.2   | 5.63  |
| S6AWD6     | tr S6AWD6 S6AWD6_HUMAN IgG L chain OS=Homo sapiens OX=9606 PE=2 SV=1                                                            | S6AWD6         | 2 | 1 | 8.990%  | 19449.87  | 8.69  |
| A0A0A6YYK7 | sp A0A0A6YYK7 TVA19_HUMAN T cell receptor alpha variable 19 OS=Homo sapiens OX=9606 GN=TRAV19 PE=2 SV=5                         | TRAV19         | 1 | 1 | 6.030%  | 13194.73  | 4.75  |
| A2RUB6     | sp A2RUB6 CCD66_HUMAN Coiled-coil domain-containing protein 66 OS=Homo sapiens OX=9606 GN=CCDC66 PE=1 SV=4                      | CCDC66         | 1 | 1 | 0.840%  | 109410.05 | 8.47  |
| A6NK02     | sp A6NK02 TRI75_HUMAN Putative tripartite motif-containing protein 75 OS=Homo sapiens OX=9606 GN=TRIM75P PE=5 SV=2              | TRIM75P        | 1 | 1 | 1.500%  | 53677.05  | 7.79  |
| A6NMB9     | sp A6NMB9 FIGL2_HUMAN Fidgetin-like protein 2 OS=Homo sapiens OX=9606 GN=FIGNL2 PE=2 SV=2                                       | FIGNL2         | 1 | 1 | 1.230%  | 66602.59  | 6.3   |

|        |                                                                                                                                                       |          |   |   |        |           |      |
|--------|-------------------------------------------------------------------------------------------------------------------------------------------------------|----------|---|---|--------|-----------|------|
| A6NNT2 | sp A6NNT2 CP096_HUMAN Uncharacterized protein C16orf96<br>OS=Homo sapiens OX=9606 GN=C16orf96 PE=4 SV=3                                               | C16orf96 | 1 | 1 | 0.700% | 125039.98 | 6.58 |
| D6RGH6 | sp D6RGH6 MCIN_HUMAN Multicilin OS=Homo sapiens<br>OX=9606 GN=MCIDAS PE=1 SV=1                                                                        | MCIDAS   | 1 | 1 | 2.080% | 41719.46  | 5.62 |
| O00443 | sp O00443 P3C2A_HUMAN Phosphatidylinositol 4-phosphate<br>3-kinase C2 domain-containing subunit alpha OS=Homo sapiens<br>OX=9606 GN=PIK3C2A PE=1 SV=2 | PIK3C2A  | 1 | 1 | 0.650% | 190677.29 | 8.25 |
| O00507 | sp O00507 USP9Y_HUMAN Probable ubiquitin carboxyl-<br>terminal hydrolase FAF-Y OS=Homo sapiens OX=9606 USP9Y<br>GN=USP9Y PE=2 SV=2                    | USP9Y    | 1 | 1 | 0.230% | 291073.61 | 5.56 |
| O14526 | sp O14526 FCHO1_HUMAN F-BAR domain only protein 1<br>OS=Homo sapiens OX=9606 GN=FCHO1 PE=1 SV=2                                                       | FCHO1    | 1 | 1 | 0.900% | 96859.8   | 6.51 |
| O14776 | sp O14776 TCRG1_HUMAN Transcription elongation regulator<br>1 OS=Homo sapiens OX=9606 GN=TCERG1 PE=1 SV=2                                             | TCERG1   | 1 | 1 | 1.000% | 123899.61 | 8.71 |
| O14782 | sp O14782 KIF3C_HUMAN Kinesin-like protein<br>OS=Homo sapiens OX=9606 GN=KIF3C PE=1 SV=3                                                              | KIF3C    | 1 | 1 | 0.760% | 89425.2   | 8.28 |
| O15230 | sp O15230 LAMA5_HUMAN Laminin subunit alpha-5<br>OS=Homo sapiens OX=9606 GN=LAMA5 PE=1 SV=8                                                           | LAMA5    | 1 | 1 | 0.270% | 399733.32 | 6.66 |
| O15516 | sp O15516 CLOCK_HUMAN Circadian locomotor output cycles<br>protein kaput OS=Homo sapiens OX=9606 GN=CLOCK PE=1<br>SV=1                                | CLOCK    | 1 | 1 | 0.830% | 95302.69  | 6.51 |
| O43776 | sp O43776 SYNC_HUMAN Asparagine--tRNA ligase,<br>cytoplasmic OS=Homo sapiens OX=9606 GN=NARS1 PE=1<br>SV=1                                            | NARS1    | 1 | 1 | 1.460% | 62942.23  | 5.9  |
| O60287 | sp O60287 NPA1P_HUMAN Nucleolar pre-ribosomal-<br>associated protein 1 OS=Homo sapiens OX=9606 GN=URB1<br>PE=1 SV=4                                   | URB1     | 1 | 1 | 0.310% | 254386.09 | 6.03 |
| O60293 | sp O60293 ZC3H1_HUMAN Zinc finger C3H1 domain-<br>containing protein OS=Homo sapiens OX=9606 GN=ZFC3H1<br>PE=1 SV=3                                   | ZFC3H1   | 1 | 1 | 0.500% | 226352.95 | 8.39 |
| O60299 | sp O60299 LZTS3_HUMAN Leucine zipper putative tumor<br>suppressor 3 OS=Homo sapiens OX=9606 GN=LZTS3 PE=2<br>SV=1                                     | LZTS3    | 1 | 1 | 1.630% | 71789.95  | 7.56 |

|        |                                                                                                                                   |         |   |   |         |           |       |
|--------|-----------------------------------------------------------------------------------------------------------------------------------|---------|---|---|---------|-----------|-------|
| O60403 | sp O60403 O10H2_HUMAN Olfactory receptor 10H2 OS=Homo sapiens OX=9606 GN=OR10H2 PE=2 SV=1                                         | OR10H2  | 1 | 1 | 1.590%  | 34662.24  | 8.71  |
| O60673 | sp O60673 REV3L_HUMAN DNA polymerase zeta catalytic subunit OS=Homo sapiens OX=9606 GN=REV3L PE=1 SV=2                            | REV3L   | 1 | 1 | 0.190%  | 352771.7  | 8.72  |
| O60763 | sp O60763 USO1_HUMAN General vesicular transport factor p115 OS=Homo sapiens OX=9606 GN=USO1 PE=1 SV=2                            | USO1    | 1 | 1 | 0.730%  | 107894.02 | 4.85  |
| O60783 | sp O60783 RT14_HUMAN 28S ribosomal protein S14, mitochondrial OS=Homo sapiens OX=9606 GN=MRPS14 PE=1 SV=1                         | MRPS14  | 1 | 1 | 11.720% | 15138.55  | 11.42 |
| O60869 | sp O60869 EDF1_HUMAN Endothelial differentiation-related factor 1 OS=Homo sapiens OX=9606 GN=EDF1 PE=1 SV=1                       | EDF1    | 1 | 1 | 4.730%  | 16368.48  | 9.95  |
| O75153 | sp O75153 CLU_HUMAN Clustered mitochondria protein homolog OS=Homo sapiens OX=9606 GN=CLUH PE=1 SV=2                              | CLUH    | 1 | 1 | 0.690%  | 146668.14 | 5.75  |
| O75165 | sp O75165 DJC13_HUMAN DnaJ homolog subfamily C member 13 OS=Homo sapiens OX=9606 GN=DNAJC13 PE=1 SV=5                             | DNAJC13 | 1 | 1 | 0.490%  | 254411.98 | 6.31  |
| O75607 | sp O75607 NPM3_HUMAN Nucleoplasmin-3 OS=Homo sapiens OX=9606 GN=NPM3 PE=1 SV=3                                                    | NPM3    | 1 | 1 | 8.990%  | 19343.48  | 4.55  |
| O75762 | sp O75762 TRPA1_HUMAN Transient receptor potential cation channel subfamily A member 1 OS=Homo sapiens OX=9606 GN=TRPA1 PE=1 SV=3 | TRPA1   | 1 | 1 | 0.540%  | 127499.59 | 6.69  |
| O94812 | sp O94812 BAIP3_HUMAN BAI1-associated protein 3 OS=Homo sapiens OX=9606 GN=BAIAP3 PE=1 SV=2                                       | BAIAP3  | 1 | 1 | 0.590%  | 131899.15 | 5.95  |
| O95071 | sp O95071 UBR5_HUMAN E3 ubiquitin-protein ligase OS=Homo sapiens OX=9606 GN=UBR5 PE=1 SV=2                                        | UBR5    | 1 | 1 | 0.290%  | 309349.01 | 5.59  |
| O95235 | sp O95235 KIF20A_HUMAN Kinesin-like protein OS=Homo sapiens OX=9606 GN=KIF20A PE=1 SV=1                                           | KIF20A  | 1 | 1 | 1.570%  | 100276.82 | 6.49  |
| P04004 | sp P04004 VTNC_HUMAN Vitronectin OS=Homo sapiens OX=9606 GN=VTN PE=1 SV=1                                                         | VTN     | 1 | 1 | 1.050%  | 54304.97  | 5.55  |

|        |                                                                                                                        |        |   |   |         |           |      |
|--------|------------------------------------------------------------------------------------------------------------------------|--------|---|---|---------|-----------|------|
| P05109 | sp P05109 S10A8_HUMAN Protein S100-A8 OS=Homo sapiens OX=9606 GN=S100A8 PE=1 SV=1                                      | S100A8 | 1 | 1 | 11.830% | 10834.38  | 6.51 |
| P05423 | sp P05423 RPC4_HUMAN DNA-directed RNA polymerase III subunit RPC4 OS=Homo sapiens OX=9606 GN=POLR3D PE=1 SV=2          | POLR3D | 1 | 1 | 1.760%  | 44395.33  | 6.51 |
| P06732 | sp P06732 KCRM_HUMAN Creatine kinase M-type OS=Homo sapiens OX=9606 GN=CKM PE=1 SV=2                                   | CKM    | 1 | 1 | 1.570%  | 43100.62  | 6.77 |
| P06870 | sp P06870 KLK1_HUMAN Kallikrein-1 OS=Homo sapiens OX=9606 GN=KLK1 PE=1 SV=2                                            | KLK1   | 1 | 1 | 4.960%  | 28889.31  | 4.68 |
| P07737 | sp P07737 PROF1_HUMAN Profilin-1 OS=Homo sapiens OX=9606 GN=PFN1 PE=1 SV=2                                             | PFN1   | 1 | 1 | 10.000% | 15054.07  | 8.44 |
| P09543 | sp P09543 CN37_HUMAN 2',3'-cyclic-nucleotide phosphodiesterase OS=Homo sapiens OX=9606 GN=CNP PE=1 SV=2                | CNP    | 1 | 1 | 2.140%  | 47578.06  | 9.17 |
| P09884 | sp P09884 DPOLA_HUMAN DNA polymerase alpha catalytic subunit OS=Homo sapiens OX=9606 GN=POLA1 PE=1 SV=2                | POLA1  | 1 | 1 | 0.960%  | 165910.88 | 5.61 |
| P0C628 | sp P0C628 O5AC1_HUMAN Olfactory receptor OS=Homo sapiens OX=9606 GN=OR5AC1 PE=3 SV=1                                   | OR5AC1 | 1 | 1 | 2.610%  | 34762.06  | 9.22 |
| P0CB33 | sp P0CB33 ZN735_HUMAN Putative zinc finger protein 735 OS=Homo sapiens OX=9606 GN=ZNF735 PE=5 SV=1                     | ZNF735 | 1 | 1 | 1.700%  | 47564.98  | 9.31 |
| P0CB47 | sp P0CB47 UBFL1_HUMAN Upstream-binding factor 1-like protein 1 OS=Homo sapiens OX=9606 GN=UBTFL1 PE=1 SV=1             | UBTFL1 | 1 | 1 | 2.800%  | 46133.85  | 9.52 |
| P0DPB6 | sp P0DPB6 RPAC2_HUMAN DNA-directed RNA polymerases I and III subunit RPAC2 OS=Homo sapiens OX=9606 GN=POLR1D PE=1 SV=1 | POLR1D | 1 | 1 | 4.510%  | 15237.05  | 5.55 |
| P12757 | sp P12757 SKIL_HUMAN Ski-like protein OS=Homo sapiens OX=9606 GN=SKIL PE=1 SV=2                                        | SKIL   | 1 | 1 | 1.170%  | 76975.15  | 6.72 |
| P13807 | sp P13807 GYS1_HUMAN Glycogen [starch] synthase, muscle OS=Homo sapiens OX=9606 GN=GYS1 PE=1 SV=2                      | GYS1   | 1 | 1 | 1.360%  | 83784.57  | 5.8  |

|        |                                                                                                                    |        |   |   |        |           |      |
|--------|--------------------------------------------------------------------------------------------------------------------|--------|---|---|--------|-----------|------|
| P17980 | sp P17980 PRS6A_HUMAN 26S proteasome regulatory subunit 6A OS=Homo sapiens OX=9606 GN=PSMC3 PE=1 SV=3              | PSMC3  | 1 | 1 | 2.280% | 49202.99  | 5.13 |
| P18089 | sp P18089 ADA2B_HUMAN Alpha-2B adrenergic receptor OS=Homo sapiens OX=9606 GN=ADRA2B PE=1 SV=4                     | ADRA2B | 1 | 1 | 1.560% | 49953.12  | 8.8  |
| P20742 | sp P20742 PZP_HUMAN Pregnancy zone protein OS=Homo sapiens OX=9606 GN=PZP PE=1 SV=4                                | PZP    | 1 | 1 | 0.810% | 163861.02 | 5.97 |
| P23470 | sp P23470 PTPRG_HUMAN Receptor-type tyrosine-protein phosphatase gamma OS=Homo sapiens OX=9606 GN=PTPRG PE=1 SV=4  | PTPRG  | 1 | 1 | 0.420% | 162001.6  | 5.99 |
| P23588 | sp P23588 EIF4B_HUMAN Eukaryotic translation initiation factor 4B OS=Homo sapiens OX=9606 GN=EIF4B PE=1 SV=2       | EIF4B  | 1 | 1 | 2.130% | 69150.37  | 5.55 |
| P25789 | sp P25789 PSA4_HUMAN Proteasome subunit alpha type-4 OS=Homo sapiens OX=9606 GN=PSMA4 PE=1 SV=1                    | PSMA4  | 1 | 1 | 3.830% | 29483.47  | 7.58 |
| P26640 | sp P26640 SYVC_HUMAN Valine--tRNA ligase OS=Homo sapiens OX=9606 GN=VAR1 PE=1 SV=4                                 | VAR1   | 1 | 1 | 0.870% | 140474.33 | 7.53 |
| P28289 | sp P28289 TMOD1_HUMAN Tropomodulin-1 OS=Homo sapiens OX=9606 GN=TMOD1 PE=1 SV=1                                    | TMOD1  | 1 | 1 | 2.510% | 40568.69  | 5.03 |
| P28332 | sp P28332 ADH6_HUMAN Alcohol dehydrogenase 6 OS=Homo sapiens OX=9606 GN=ADH6 PE=1 SV=3                             | ADH6   | 1 | 1 | 2.170% | 39072.18  | 8.07 |
| P29218 | sp P29218 IMPA1_HUMAN Inositol monophosphatase 1 OS=Homo sapiens OX=9606 GN=IMPA1 PE=1 SV=1                        | IMPA1  | 1 | 1 | 2.890% | 30188.5   | 5.16 |
| P29374 | sp P29374 ARI4A_HUMAN AT-rich interactive domain-containing protein 4A OS=Homo sapiens OX=9606 GN=ARID4A PE=1 SV=3 | ARID4A | 1 | 1 | 0.560% | 142750.06 | 5.02 |
| P36871 | sp P36871 PGM1_HUMAN Phosphoglucomutase-1 OS=Homo sapiens OX=9606 GN=PGM1 PE=1 SV=3                                | PGM1   | 1 | 1 | 1.420% | 61448.39  | 6.3  |
| P37288 | sp P37288 V1AR_HUMAN Vasopressin V1a receptor OS=Homo sapiens OX=9606 GN=AVPR1A PE=1 SV=1                          | AVPR1A | 1 | 1 | 1.440% | 46799.02  | 9.48 |

|        |                                                                                                                                                         |         |   |   |         |           |       |
|--------|---------------------------------------------------------------------------------------------------------------------------------------------------------|---------|---|---|---------|-----------|-------|
| P38432 | sp P38432 COIL_HUMAN Coilin OS=Homo sapiens OX=9606<br>GN=COIL PE=1 SV=1                                                                                | COIL    | 1 | 1 | 1.560%  | 62607.59  | 9.2   |
| P43686 | sp P43686 PRS6B_HUMAN 26S proteasome regulatory subunit<br>6B OS=Homo sapiens OX=9606 GN=PSMC4 PE=1 SV=2                                                | PSMC4   | 1 | 1 | 4.310%  | 47365.69  | 5.09  |
| P47989 | sp P47989 XDH_HUMAN Xanthine dehydrogenase/oxidase<br>OS=Homo sapiens OX=9606 GN=XDH PE=1 SV=4                                                          | XDH     | 1 | 1 | 1.200%  | 146422.57 | 7.86  |
| P48736 | sp P48736 PK3CG_HUMAN Phosphatidylinositol 4,5-<br>bisphosphate 3-kinase catalytic subunit gamma isoform<br>OS=Homo sapiens OX=9606 GN=PIK3CG PE=1 SV=3 | PIK3CG  | 1 | 1 | 0.540%  | 126452.16 | 7.23  |
| P50748 | sp P50748 KNTC1_HUMAN Kinetochore-associated protein 1<br>OS=Homo sapiens OX=9606 GN=KNTC1 PE=1 SV=1                                                    | KNTC1   | 1 | 1 | 0.360%  | 250745.63 | 5.67  |
| P51149 | sp P51149 RAB7A_HUMAN Ras-related protein Rab-7a<br>OS=Homo sapiens OX=9606 GN=RAB7A PE=1 SV=1                                                          | RAB7A   | 1 | 1 | 4.830%  | 23489.48  | 6.4   |
| P52948 | sp P52948 NUP98_HUMAN Nuclear pore complex protein<br>Nup98-Nup96 OS=Homo sapiens OX=9606 GN=NUP98 PE=1<br>SV=4                                         | NUP98   | 1 | 1 | 0.440%  | 197576.98 | 5.97  |
| P53007 | sp P53007 TXTP_HUMAN Tricarboxylate transport protein,<br>mitochondrial OS=Homo sapiens OX=9606 GN=SLC25A1<br>PE=1 SV=2                                 | SLC25A1 | 1 | 1 | 2.570%  | 34012.3   | 9.91  |
| P61020 | sp P61020 RAB5B_HUMAN Ras-related protein Rab-5B<br>OS=Homo sapiens OX=9606 GN=RAB5B PE=1 SV=1                                                          | RAB5B   | 1 | 1 | 2.790%  | 23706.54  | 8.29  |
| P62273 | sp P62273 RS29_HUMAN 40S ribosomal protein S29<br>OS=Homo sapiens OX=9606 GN=RPS29 PE=1 SV=2                                                            | RPS29   | 1 | 1 | 19.640% | 6676.71   | 10.16 |
| P62318 | sp P62318 SMD3_HUMAN Small nuclear ribonucleoprotein Sm<br>D3 OS=Homo sapiens OX=9606 GN=SNRPD3 PE=1 SV=1                                               | SNRPD3  | 1 | 1 | 7.940%  | 13916.11  | 10.33 |
| P98196 | sp P98196 AT11A_HUMAN Phospholipid-transporting ATPase<br>IH OS=Homo sapiens OX=9606 GN=ATP11A PE=1 SV=3                                                | ATP11A  | 1 | 1 | 0.620%  | 129754.24 | 6.17  |
| Q00688 | sp Q00688 FKBP3_HUMAN Peptidyl-prolyl cis-trans isomerase<br>FKBP3 OS=Homo sapiens OX=9606 GN=FKBP3 PE=1 SV=1                                           | FKBP3   | 1 | 1 | 3.130%  | 25176.51  | 9.29  |

|        |                                                                                                                            |                |   |   |        |           |      |
|--------|----------------------------------------------------------------------------------------------------------------------------|----------------|---|---|--------|-----------|------|
| Q02241 | sp Q02241 KIF23_HUMAN Kinesin-like protein OS=Homo sapiens OX=9606 GN=KIF23 PE=1 SV=3                                      | KIF23<br>KIF23 | 1 | 1 | 1.250% | 110057.6  | 8.76 |
| Q02413 | sp Q02413 DSG1_HUMAN Desmoglein-1 OS=Homo sapiens OX=9606 GN=DSG1 PE=1 SV=2                                                | DSG1           | 1 | 1 | 0.670% | 113746.35 | 4.9  |
| Q02952 | sp Q02952 AKA12_HUMAN A-kinase anchor protein 12 OS=Homo sapiens OX=9606 GN=AKAP12 PE=1 SV=4                               | AKAP12         | 1 | 1 | 0.560% | 191479.5  | 4.37 |
| Q05481 | sp Q05481 ZNF91_HUMAN Zinc finger protein 91 OS=Homo sapiens OX=9606 GN=ZNF91 PE=2 SV=2                                    | ZNF91          | 1 | 1 | 0.500% | 137215.96 | 9.45 |
| Q06124 | sp Q06124 PTN11_HUMAN Tyrosine-protein phosphatase non-receptor type 11 OS=Homo sapiens OX=9606 GN=PTPN11 PTPN11 PE=1 SV=3 | PTPN11         | 1 | 1 | 2.020% | 68010.01  | 6.87 |
| Q06547 | sp Q06547 GABP1_HUMAN GA-binding protein subunit beta-1 OS=Homo sapiens OX=9606 GN=GABPB1 PE=1 SV=2                        | GABPB1         | 1 | 1 | 1.520% | 42482.17  | 4.77 |
| Q08426 | sp Q08426 ECHP_HUMAN Peroxisomal bifunctional enzyme OS=Homo sapiens OX=9606 GN=EHHADH PE=1 SV=3                           | EHHADH         | 1 | 1 | 1.240% | 79493.94  | 9.24 |
| Q12797 | sp Q12797 ASPH_HUMAN Aspartyl/asparaginyl beta-hydroxylase OS=Homo sapiens OX=9606 GN=ASPH PE=1 SV=3                       | ASPH           | 1 | 1 | 1.850% | 85861.58  | 4.92 |
| Q13112 | sp Q13112 CAF1B_HUMAN Chromatin assembly factor 1 subunit B OS=Homo sapiens OX=9606 GN=CHAF1B PE=1 SV=1                    | CHAF1B         | 1 | 1 | 1.970% | 61491.79  | 7.18 |
| Q13206 | sp Q13206 DDX10_HUMAN Probable ATP-dependent RNA helicase DDX10 OS=Homo sapiens OX=9606 GN=DDX10 DDX10 PE=1 SV=2           | DDX10          | 1 | 1 | 1.260% | 100886.74 | 8.72 |
| Q13724 | sp Q13724 MOGS_HUMAN Mannosyl-oligosaccharide glucosidase OS=Homo sapiens OX=9606 GN=MOGS PE=1 SV=5                        | MOGS           | 1 | 1 | 1.430% | 91916.43  | 8.97 |
| Q14055 | sp Q14055 CO9A2_HUMAN Collagen alpha-2(IX) chain OS=Homo sapiens OX=9606 GN=COL9A2 PE=1 SV=2                               | COL9A2         | 1 | 1 | 1.020% | 65130.17  | 9.23 |
| Q14166 | sp Q14166 TTL12_HUMAN Tubulin--tyrosine ligase-like protein 12 OS=Homo sapiens OX=9606 GN=TTLL12 PE=1 SV=2                 | TTLL12         | 1 | 1 | 1.550% | 74402.76  | 5.33 |



|        |                                                                                                                              |   |   |        |           |       |
|--------|------------------------------------------------------------------------------------------------------------------------------|---|---|--------|-----------|-------|
| Q14494 | sp Q14494 NF2L1_HUMAN Endoplasmic reticulum membrane sensor NFE2L1 OS=Homo sapiens OX=9606 GN=NFE2L1 NFE2L1 PE=1 SV=1        | 1 | 1 | 0.910% | 84702.83  | 4.52  |
| Q15386 | sp Q15386 UBE3C_HUMAN Ubiquitin-protein ligase E3C UBE3C OS=Homo sapiens OX=9606 GN=UBE3C PE=1 SV=3                          | 1 | 1 | 0.740% | 123921.18 | 6.27  |
| Q15633 | sp Q15633 TRBP2_HUMAN RISC-loading complex subunit TARBP2 OS=Homo sapiens OX=9606 GN=TARBP2 PE=1 TARBP2 SV=3                 | 1 | 1 | 1.910% | 39038.9   | 6.11  |
| Q15650 | sp Q15650 TRIP4_HUMAN Activating signal cointegrator 1 TRIP4 OS=Homo sapiens OX=9606 GN=TRIP4 PE=1 SV=4                      | 1 | 1 | 1.380% | 66145.46  | 8.05  |
| Q15835 | sp Q15835 GRK1_HUMAN Rhodopsin kinase GRK1 OS=Homo sapiens OX=9606 GN=GRK1 PE=1 SV=1                                         | 1 | 1 | 1.070% | 63525.14  | 5.63  |
| Q16559 | sp Q16559 TAL2_HUMAN T-cell acute lymphocytic leukemia protein 2 OS=Homo sapiens OX=9606 GN=TAL2 PE=1 SV=1                   | 1 | 1 | 8.330% | 12291.07  | 10.48 |
| Q16625 | sp Q16625 OCLN_HUMAN Occludin OS=Homo sapiens OX=9606 GN=OCLN PE=1 SV=1                                                      | 1 | 1 | 1.530% | 59143.1   | 5.77  |
| Q16643 | sp Q16643 DREB_HUMAN Drebrin OS=Homo sapiens OX=9606 GN=DNB1 PE=1 SV=4                                                       | 1 | 1 | 3.080% | 71428.45  | 4.41  |
| Q2LD37 | sp Q2LD37 K1109_HUMAN Transmembrane protein KIAA1109 OS=Homo sapiens OX=9606 GN=KIAA1109 PE=1 SV=2                           | 1 | 1 | 0.100% | 555475.45 | 6.12  |
| Q2VIQ3 | sp Q2VIQ3 KIF4B_HUMAN Chromosome-associated kinesin KIF4B OS=Homo sapiens OX=9606 GN=KIF4B PE=2 SV=2                         | 1 | 1 | 0.810% | 140033.65 | 5.88  |
| Q3KP66 | sp Q3KP66 INAVA_HUMAN Innate immunity activator protein INAVA OS=Homo sapiens OX=9606 GN=INAVA PE=1 SV=2                     | 1 | 1 | 0.750% | 72913.41  | 9.42  |
| Q3L8U1 | sp Q3L8U1 CHD9_HUMAN Chromodomain-helicase-DNA-binding protein 9 OS=Homo sapiens OX=9606 GN=CHD9 PE=1 CHD9 SV=2              | 1 | 1 | 0.280% | 326018.05 | 6.56  |
| Q3SY52 | sp Q3SY52 ZIK1_HUMAN Zinc finger protein interacting with ribonucleoprotein K OS=Homo sapiens OX=9606 GN=ZIK1 ZIK1 PE=1 SV=1 | 1 | 1 | 1.030% | 54785.69  | 9.1   |

|        |                                                                                                                                    |   |   |        |           |      |
|--------|------------------------------------------------------------------------------------------------------------------------------------|---|---|--------|-----------|------|
| Q4G0X9 | sp Q4G0X9 CCD40_HUMAN Coiled-coil domain-containing protein 40 OS=Homo sapiens OX=9606 GN=CCDC40 PE=1 CCD40 SV=2                   | 1 | 1 | 0.610% | 130111.89 | 5.21 |
| Q4VC05 | sp Q4VC05 BCL7A_HUMAN B-cell CLL/lymphoma 7 protein family member A OS=Homo sapiens OX=9606 GN=BCL7ABCL7A PE=1 SV=1                | 1 | 1 | 2.860% | 22809.65  | 5.01 |
| Q58HT5 | sp Q58HT5 AWAT1_HUMAN Acyl-CoA wax alcohol acyltransferase 1 OS=Homo sapiens OX=9606 GN=AWAT1 AWAT1 PE=1 SV=1                      | 1 | 1 | 1.520% | 37758.6   | 9.06 |
| Q59EK9 | sp Q59EK9 RUN3A_HUMAN RUN domain-containing protein 3A OS=Homo sapiens OX=9606 GN=RUNDC3A PE=1 SV=2 RUNDC3A                        | 1 | 1 | 1.350% | 49746.48  | 5.19 |
| Q5BKZ1 | sp Q5BKZ1 ZN326_HUMAN DBIRD complex subunit ZNF326 OS=Homo sapiens OX=9606 GN=ZNF326 PE=1 SV=2 ZNF326                              | 1 | 1 | 1.890% | 65653.07  | 5.08 |
| Q5FYB1 | sp Q5FYB1 ARSI_HUMAN Arylsulfatase I OS=Homo sapiens OX=9606 GN=ARSI PE=1 SV=1 ARSI                                                | 1 | 1 | 1.050% | 64029.5   | 8.82 |
| Q5JY77 | sp Q5JY77 GASP1_HUMAN G-protein coupled receptor-associated sorting protein 1 OS=Homo sapiens OX=9606 GN=GPRASP1 PE=1 SV=3 GPRASP1 | 1 | 1 | 0.570% | 156863.68 | 4.64 |
| Q5NUL3 | sp Q5NUL3 FFAR4_HUMAN Free fatty acid receptor 4 OS=Homo sapiens OX=9606 GN=FFAR4 PE=1 SV=3 FFAR4                                  | 1 | 1 | 1.660% | 40493.9   | 9.7  |
| Q5SZK8 | sp Q5SZK8 FREM2_HUMAN FRAS1-related extracellular matrix protein 2 OS=Homo sapiens OX=9606 GN=FREM2 PE=1 SV=2 FREM2                | 1 | 1 | 0.280% | 351152.69 | 4.89 |
| Q5TFE4 | sp Q5TFE4 NT5D1_HUMAN 5'-nucleotidase domain-containing protein 1 OS=Homo sapiens OX=9606 GN=NT5DC1 PE=1 SV=1 NT5DC1               | 1 | 1 | 1.980% | 51844.35  | 5.94 |
| Q5TGL8 | sp Q5TGL8 PXDC1_HUMAN PX domain-containing protein 1 OS=Homo sapiens OX=9606 GN=PXDC1 PE=2 SV=3 PXDC1                              | 1 | 1 | 3.030% | 26559.6   | 4.94 |
| Q5THR3 | sp Q5THR3 EFCB6_HUMAN EF-hand calcium-binding domain-containing protein 6 OS=Homo sapiens OX=9606 GN=EFCAB6 PE=1 SV=1 EFCAB6       | 1 | 1 | 0.470% | 172927.77 | 8.67 |
| Q5VT52 | sp Q5VT52 RPRD2_HUMAN Regulation of nuclear pre-mRNA domain-containing protein 2 OS=Homo sapiens OX=9606 GN=RPRD2 PE=1 SV=1 RPRD2  | 1 | 1 | 0.620% | 156017.72 | 6.97 |

|        |                                                                                                                    |         |   |   |        |           |      |
|--------|--------------------------------------------------------------------------------------------------------------------|---------|---|---|--------|-----------|------|
| Q5VTB9 | sp Q5VTB9 RN220_HUMAN E3 ubiquitin-protein ligase RNF220 OS=Homo sapiens OX=9606 GN=RNF220 PE=1 SV=1               | RNF220  | 1 | 1 | 1.060% | 62764.62  | 5.7  |
| Q5W0B1 | sp Q5W0B1 OBI1_HUMAN ORC ubiquitin ligase 1 OS=Homo sapiens OX=9606 GN=OBI1 PE=1 SV=1                              | OBI1    | 1 | 1 | 1.240% | 81115.58  | 5.53 |
| Q6IC98 | sp Q6IC98 GRAM4_HUMAN GRAM domain-containing protein 4 OS=Homo sapiens OX=9606 GN=GRAMD4 PE=1 SV=1                 | GRAMD4  | 1 | 1 | 1.900% | 66407.32  | 8.98 |
| Q6IF00 | sp Q6IF00 OR2T2_HUMAN Olfactory receptor 2T2 OS=Homo sapiens OX=9606 GN=OR2T2 PE=2 SV=1                            | OR2T2   | 1 | 1 | 2.160% | 36227.99  | 9.03 |
| Q6IPR3 | sp Q6IPR3 TYW3_HUMAN tRNA wybutosine-synthesizing protein 3 homolog OS=Homo sapiens OX=9606 GN=TYW3 TYW3 PE=1 SV=2 | TYW3    | 1 | 1 | 2.320% | 29793.81  | 7.59 |
| Q6JVE5 | sp Q6JVE5 LCN12_HUMAN Epididymal-specific lipocalin-12 OS=Homo sapiens OX=9606 GN=LCN12 PE=2 SV=1                  | LCN12   | 1 | 1 | 3.130% | 21499.3   | 5.48 |
| Q6PGP7 | sp Q6PGP7 TTC37_HUMAN Tetratricopeptide repeat protein 37 OS=Homo sapiens OX=9606 GN=TTC37 PE=1 SV=1               | TTC37   | 1 | 1 | 0.640% | 175484.31 | 7.47 |
| Q6TFL3 | sp Q6TFL3 CC171_HUMAN Coiled-coil domain-containing protein 171 OS=Homo sapiens OX=9606 GN=CCDC171 PE=2 SV=1       | CCDC171 | 1 | 1 | 0.450% | 152808.23 | 6.37 |
| Q6UWE0 | sp Q6UWE0 LRSM1_HUMAN E3 ubiquitin-protein ligase LRSAM1 OS=Homo sapiens OX=9606 GN=LRSAM1 PE=1 SV=1               | LRSAM1  | 1 | 1 | 0.690% | 83592.98  | 5.7  |
| Q6UWY0 | sp Q6UWY0 ARSK_HUMAN Arylsulfatase K OS=Homo sapiens OX=9606 GN=ARSK PE=1 SV=1                                     | ARSK    | 1 | 1 | 1.120% | 61449.72  | 9.02 |
| Q6WRI0 | sp Q6WRI0 IGS10_HUMAN Immunoglobulin superfamily member 10 OS=Homo sapiens OX=9606 GN=IGSF10 PE=1 SV=1             | IGSF10  | 1 | 1 | 0.300% | 290834.56 | 9.25 |
| Q6XZF7 | sp Q6XZF7 DNMBP_HUMAN Dynamin-binding protein OS=Homo sapiens OX=9606 GN=DNMBP PE=1 SV=1                           | DNMBP   | 1 | 1 | 0.380% | 177345.03 | 5.26 |
| Q6ZRP7 | sp Q6ZRP7 QSOX2_HUMAN Sulfhydryl oxidase 2 OS=Homo sapiens OX=9606 GN=QSOX2 PE=1 SV=3                              | QSOX2   | 1 | 1 | 0.860% | 77527.82  | 7.64 |

|        |                                                |                                                                                                    |          |   |   |        |           |       |
|--------|------------------------------------------------|----------------------------------------------------------------------------------------------------|----------|---|---|--------|-----------|-------|
| Q709C8 | sp Q709C8 VP13C_HUMAN<br>GN=VPS13C PE=1 SV=1   | Vacuolar protein sorting-associated protein 13C OS=Homo sapiens OX=9606                            | VPS13C   | 1 | 1 | 0.270% | 422385.06 | 6.38  |
| Q70Z35 | sp Q70Z35 PREX2_HUMAN<br>GN=PREX2 PE=1 SV=1    | Phosphatidylinositol 3,4,5-trisphosphate-dependent Rac exchanger 2 protein OS=Homo sapiens OX=9606 | PREX2    | 1 | 1 | 0.560% | 182620    | 7.26  |
| Q719I0 | sp Q719I0 AHSA2_HUMAN<br>GN=AHSA2P PE=5 SV=2   | Putative activator of 90 kDa heat shock protein ATPase homolog 2 OS=Homo sapiens OX=9606           | AHSA2P   | 1 | 1 | 2.680% | 33805.62  | 6.98  |
| Q7Z404 | sp Q7Z404 TMC4_HUMAN<br>GN=TMC4 PE=1 SV=3      | Transmembrane channel-like protein 4 OS=Homo sapiens OX=9606                                       | TMC4     | 1 | 1 | 0.840% | 79206.73  | 9.16  |
| Q86VR8 | sp Q86VR8 FJX1_HUMAN<br>GN=FJX1 PE=2 SV=1      | Four-jointed box protein 1 OS=Homo sapiens OX=9606                                                 | FJX1     | 1 | 1 | 1.370% | 48505.95  | 10.66 |
| Q86WK6 | sp Q86WK6 AMGO1_HUMAN<br>GN=AMIGO1 PE=1 SV=1   | Amphoterin-induced protein 1 OS=Homo sapiens OX=9606                                               | AMIGO1   | 1 | 1 | 2.030% | 55238.6   | 6.22  |
| Q86WS4 | sp Q86WS4 CL040_HUMAN<br>GN=C12orf40 PE=1 SV=3 | Uncharacterized protein C12orf40 OS=Homo sapiens OX=9606                                           | C12orf40 | 1 | 1 | 1.230% | 74503.75  | 8.21  |
| Q86XI2 | sp Q86XI2 CNDG2_HUMAN<br>GN=NCAPG2 PE=1 SV=1   | Condensin-2 complex subunit G2 OS=Homo sapiens OX=9606                                             | NCAPG2   | 1 | 1 | 0.870% | 130958.77 | 6.43  |
| Q86Y56 | sp Q86Y56 DAAF5_HUMAN<br>GN=DNAAF5 PE=1 SV=4   | Dynein axonemal assembly factor 5 OS=Homo sapiens OX=9606                                          | DNAAF5   | 1 | 1 | 1.400% | 93520.07  | 5.98  |
| Q8IU60 | sp Q8IU60 DCP2_HUMAN<br>GN=DCP2 PE=1 SV=3      | m7GpppN-mRNA hydrolase OS=Homo sapiens OX=9606                                                     | DCP2     | 1 | 1 | 1.670% | 48422.58  | 8.21  |
| Q8IWI9 | sp Q8IWI9 MGAP_HUMAN<br>GN=MGA PE=1 SV=4       | MAX gene-associated protein OS=Homo sapiens OX=9606                                                | MGA      | 1 | 1 | 0.330% | 336155.56 | 6.48  |
| Q8IX94 | sp Q8IX94 CTGE4_HUMAN<br>GN=CTAGE4 PE=2 SV=3   | cTAGE family member 4 OS=Homo sapiens OX=9606                                                      | CTAGE4   | 1 | 1 | 0.640% | 87987.88  | 5.18  |
| Q8IXQ8 | sp Q8IXQ8 PDZD9_HUMAN<br>GN=PDZD9 PE=2 SV=2    | PDZ domain-containing protein 9 OS=Homo sapiens OX=9606                                            | PDZD9    | 1 | 1 | 2.270% | 29903.61  | 8.99  |

|        |                                                                                                                     |          |   |   |        |           |       |
|--------|---------------------------------------------------------------------------------------------------------------------|----------|---|---|--------|-----------|-------|
| Q8IYB3 | sp Q8IYB3 SRRM1_HUMAN Serine/arginine repetitive matrix protein 1 OS=Homo sapiens OX=9606 GN=SRRM1 PE=1 SV=2        | SRRM1    | 1 | 1 | 1.330% | 102333.88 | 11.84 |
| Q8IYE0 | sp Q8IYE0 CC146_HUMAN Coiled-coil domain-containing protein 146 OS=Homo sapiens OX=9606 GN=CCDC146 PE=1 SV=2        | CCDC146  | 1 | 1 | 0.630% | 112805.18 | 8.59  |
| Q8IYM2 | sp Q8IYM2 SLN12_HUMAN Schlafen family member 12 OS=Homo sapiens OX=9606 GN=SLFN12 PE=1 SV=2                         | SLFN12   | 1 | 1 | 1.210% | 66971.77  | 8.84  |
| Q8IZC6 | sp Q8IZC6 CORA1_HUMAN Collagen alpha-1(XXVII) chain OS=Homo sapiens OX=9606 GN=COL27A1 PE=1 SV=1                    | COL27A1  | 1 | 1 | 0.540% | 186890.15 | 9.83  |
| Q8IZF6 | sp Q8IZF6 AGRG4_HUMAN Adhesion G-protein coupled receptor G4 OS=Homo sapiens OX=9606 GN=ADGRG4 PE=2 SV=2            | ADGRG4   | 1 | 1 | 0.190% | 333364.23 | 5.82  |
| Q8IZH2 | sp Q8IZH2 XRN1_HUMAN 5'-3' exoribonuclease 1 OS=Homo sapiens OX=9606 GN=XRN1 PE=1 SV=1                              | XRN1     | 1 | 1 | 0.470% | 194105    | 6.78  |
| Q8N158 | sp Q8N158 GPC2_HUMAN Glypican-2 OS=Homo sapiens OX=9606 GN=GPC2 PE=1 SV=1                                           | GPC2     | 1 | 1 | 1.040% | 62828.9   | 8.33  |
| Q8N3C0 | sp Q8N3C0 ASCC3_HUMAN Activating signal cointegrator 1 complex subunit 3 OS=Homo sapiens OX=9606 GN=ASCC3 PE=1 SV=3 | ASCC3    | 1 | 1 | 0.450% | 251457.36 | 6.64  |
| Q8N456 | sp Q8N456 LRC18_HUMAN Leucine-rich repeat-containing protein 18 OS=Homo sapiens OX=9606 GN=LRR18 PE=1 SV=2          | LRR18    | 1 | 1 | 2.300% | 29736.5   | 9.83  |
| Q8N999 | sp Q8N999 C12orf29_HUMAN Uncharacterized protein C12orf29 OS=Homo sapiens OX=9606 GN=C12orf29 PE=1 SV=2             | C12orf29 | 1 | 1 | 3.080% | 37489.59  | 6.6   |
| Q8N9F0 | sp Q8N9F0 NAT8L_HUMAN N-acetylaspartate synthetase OS=Homo sapiens OX=9606 GN=NAT8L PE=1 SV=3                       | NAT8L    | 1 | 1 | 2.980% | 32836.86  | 9.05  |
| Q8NB90 | sp Q8NB90 AFG2H_HUMAN ATPase family protein 2 homolog OS=Homo sapiens OX=9606 GN=SPATA5 PE=1 SV=3                   | SPATA5   | 1 | 1 | 1.340% | 97903.29  | 5.5   |
| Q8NDB2 | sp Q8NDB2 BANK1_HUMAN B-cell scaffold protein with ankyrin repeats OS=Homo sapiens OX=9606 GN=BANK1 PE=1 SV=3       | BANK1    | 1 | 1 | 1.270% | 89280.86  | 5.28  |

|        |                                                                                                                         |         |   |   |        |           |      |
|--------|-------------------------------------------------------------------------------------------------------------------------|---------|---|---|--------|-----------|------|
| Q8NEJ9 | sp Q8NEJ9 NGDN_HUMAN Neuroguidin OS=Homo sapiens<br>OX=9606 GN=NGDN PE=1 SV=1                                           | NGDN    | 1 | 1 | 5.710% | 35893.68  | 9.57 |
| Q8NEP3 | sp Q8NEP3 DAAF1_HUMAN Dynein axonemal assembly factor<br>1 OS=Homo sapiens OX=9606 GN=DAAF1 PE=1 SV=5                   | DNAAF1  | 1 | 1 | 1.100% | 80025.22  | 4.57 |
| Q8NEZ4 | sp Q8NEZ4 KMT2C_HUMAN Histone-lysine N-<br>methyltransferase 2C OS=Homo sapiens OX=9606 GN=KMT2C<br>PE=1 SV=3           | KMT2C   | 1 | 1 | 0.140% | 541363.8  | 6.07 |
| Q8NFW9 | sp Q8NFW9 MYRIP_HUMAN Rab effector MyRIP OS=Homo<br>sapiens OX=9606 GN=MYRIP PE=1 SV=2                                  | MYRIP   | 1 | 1 | 1.750% | 95705.17  | 5.44 |
| Q8NFZ8 | sp Q8NFZ8 CADM4_HUMAN Cell adhesion molecule 4<br>OS=Homo sapiens OX=9606 GN=CADM4 PE=1 SV=1                            | CADM4   | 1 | 1 | 3.610% | 42784.82  | 5.92 |
| Q8TAT5 | sp Q8TAT5 NEIL3_HUMAN Endonuclease 8-like 3 OS=Homo<br>sapiens OX=9606 GN=NEIL3 PE=1 SV=3                               | NEIL3   | 1 | 1 | 2.150% | 67768.38  | 9.23 |
| Q8TAT6 | sp Q8TAT6 NPLOC4_HUMAN Nuclear protein localization protein 4<br>homolog OS=Homo sapiens OX=9606 GN=NPLOC4 PE=1<br>SV=3 | NPLOC4  | 1 | 1 | 1.320% | 68119.46  | 5.94 |
| Q8TC07 | sp Q8TC07 TBC15_HUMAN TBC1 domain family member 15<br>OS=Homo sapiens OX=9606 GN=TBC1D15 PE=1 SV=2                      | TBC1D15 | 1 | 1 | 1.740% | 79489.78  | 5.44 |
| Q8TCG1 | sp Q8TCG1 CIP2A_HUMAN Protein CIP2A OS=Homo sapiens<br>OX=9606 GN=CIP2A PE=1 SV=2                                       | CIP2A   | 1 | 1 | 0.880% | 102183.83 | 5.85 |
| Q8TDW7 | sp Q8TDW7 FAT3_HUMAN Protocadherin Fat 3 OS=Homo<br>sapiens OX=9606 GN=FAT3 PE=2 SV=3                                   | FAT3    | 1 | 1 | 0.200% | 501972.22 | 4.72 |
| Q8TEC5 | sp Q8TEC5 SH3RF2_HUMAN E3 ubiquitin-protein ligase<br>SH3RF2 OS=Homo sapiens OX=9606 GN=SH3RF2 PE=1<br>SV=3             | SH3RF2  | 1 | 1 | 0.820% | 79318.8   | 9.96 |
| Q8TEQ6 | sp Q8TEQ6 GEMI5_HUMAN Gem-associated protein 5<br>OS=Homo sapiens OX=9606 GN=GEMIN5 PE=1 SV=3                           | GEMIN5  | 1 | 1 | 0.600% | 168587.45 | 6.17 |
| Q8WU90 | sp Q8WU90 ZC3HF_HUMAN Zinc finger CCCH domain-<br>containing protein 15 OS=Homo sapiens OX=9606 GN=ZC3H15<br>PE=1 SV=1  | ZC3H15  | 1 | 1 | 3.990% | 48601.91  | 5.22 |
